# Supplementary material for: Synthesis and electrochemical properties of molybdenum nitrido complexes supported by redox-active NHC and MIC ligands
Source: Royal Society of Chemistry journal article supplement (doi:10.1039/d4dt02405b), 2024-11-01
Supplement: d4dt02405b1.pdf [file d4dt02405b1.pdf]

## Supplementary Information for

# Synthesis and Electrochemical Properties of Molybdenum Nitrido Complexes Supported by Redox-Active NHC and MIC Ligands

Daniel Leitner,<sup>a</sup> Florian R. Neururer<sup>a</sup> and Stephan Hohloch<sup>a\*</sup>

### Table of contents:

|                                      |     |
|--------------------------------------|-----|
| 1. NMR spectroscopy .....            | 2   |
| 2. IR spectroscopy .....             | 82  |
| 3. UV-Vis Spectroscopy.....          | 87  |
| 4. Cyclic Voltammetry .....          | 94  |
| 5. Computational Details.....        | 100 |
| 6. Crystallographic Information..... | 104 |

---

<sup>a</sup>Department of General, Inorganic and Theoretical Chemistry, University of Innsbruck, Innrain 80-82, 6020 Innsbruck, Austria, E-Mail: [Stephan.Hohloch@uibk.ac.at](mailto:Stephan.Hohloch@uibk.ac.at)

Electronic Supplementary Information (ESI) available: [details of any supplementary information available should be included here]. See DOI: 10.1039/x0xx00000x

# 1. NMR spectroscopy

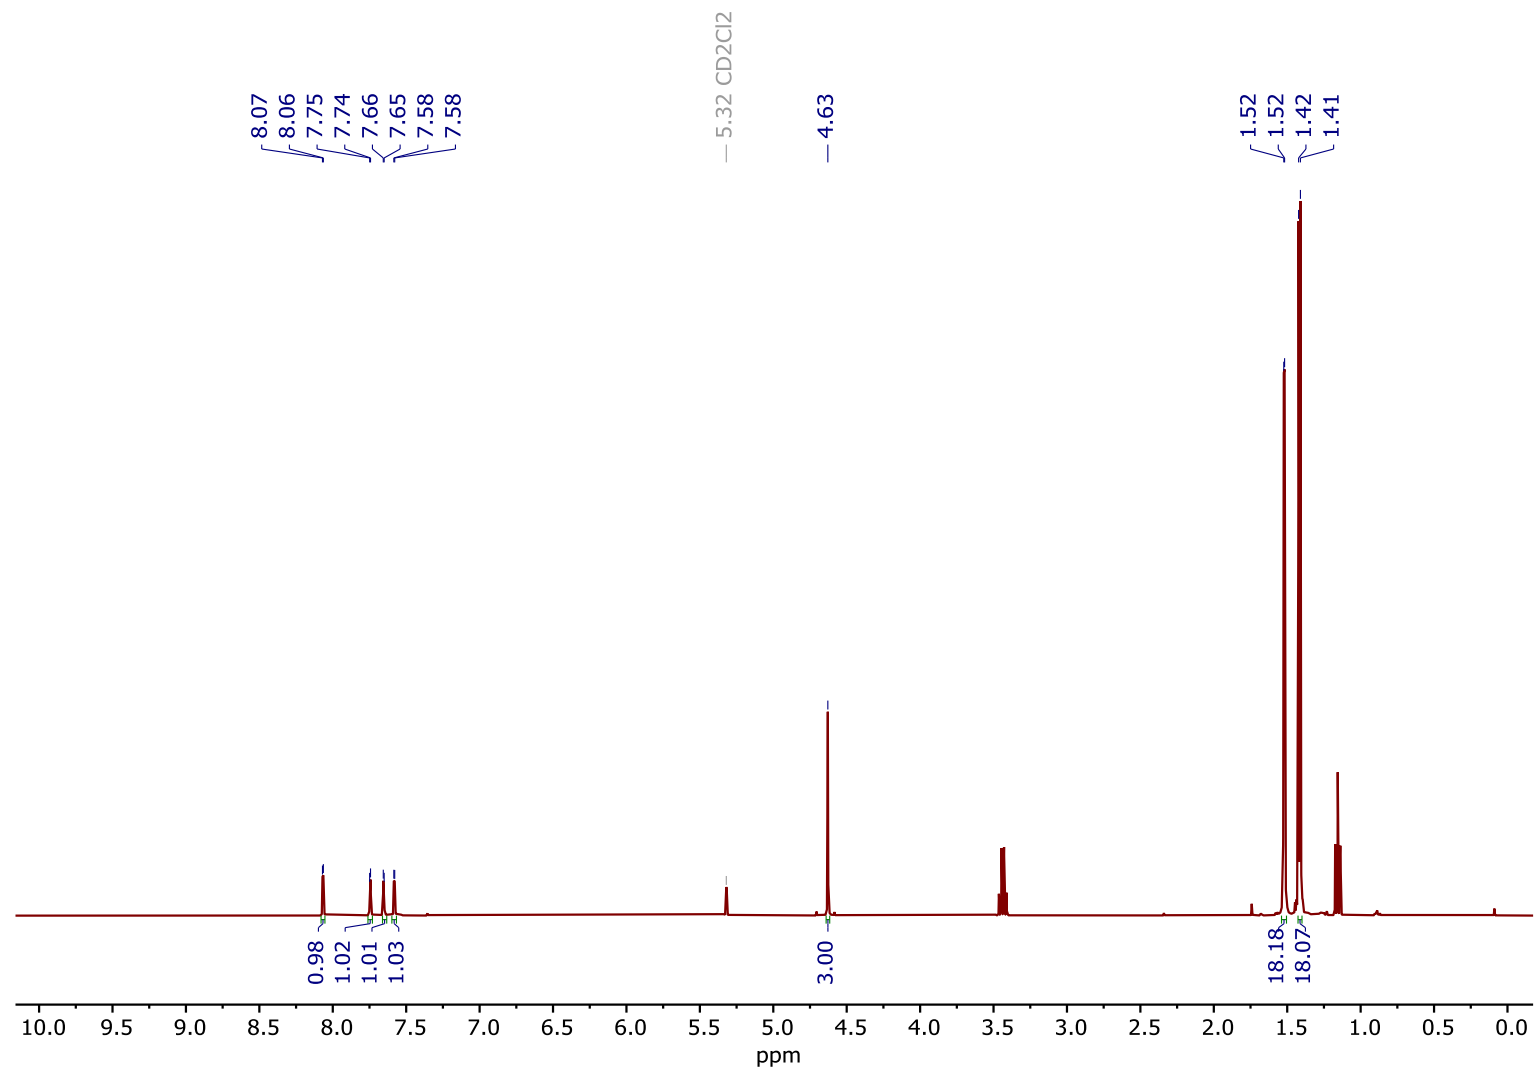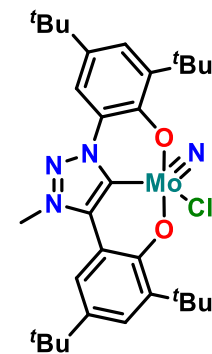

Figure S 1: <sup>1</sup>H NMR of 1-Cl in CD<sub>2</sub>Cl<sub>2</sub> at 298 K.

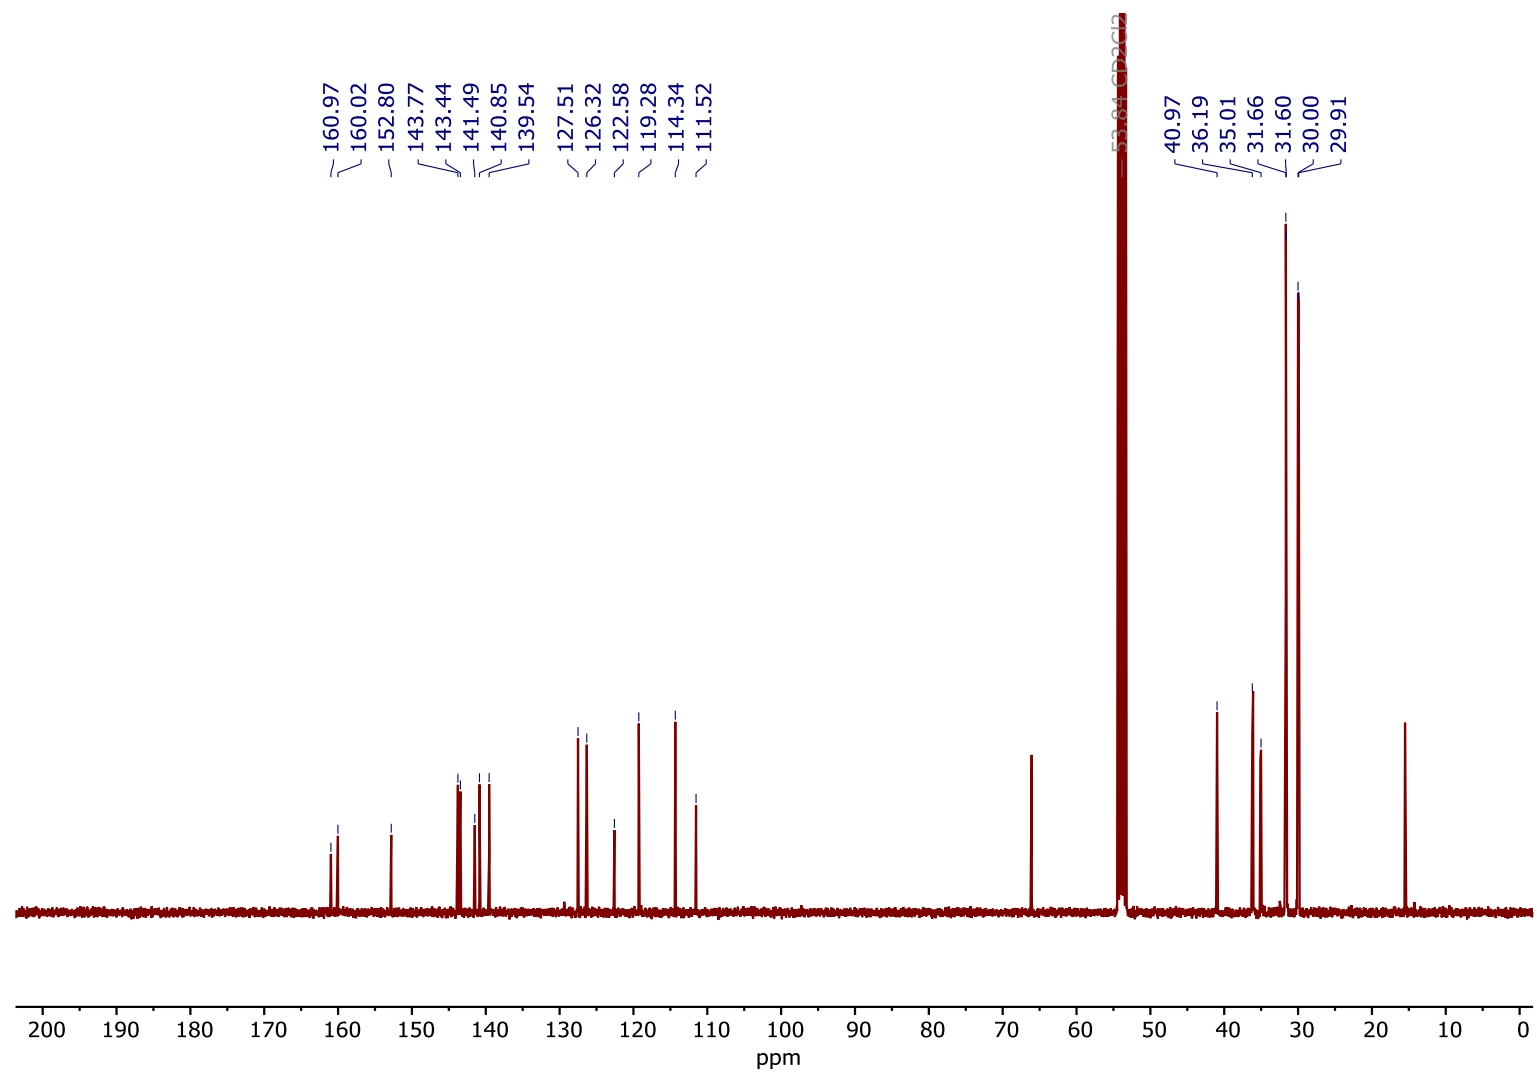

Figure S 2: <sup>13</sup>C NMR of **1-Cl** in CD<sub>2</sub>Cl<sub>2</sub> at 298 K.

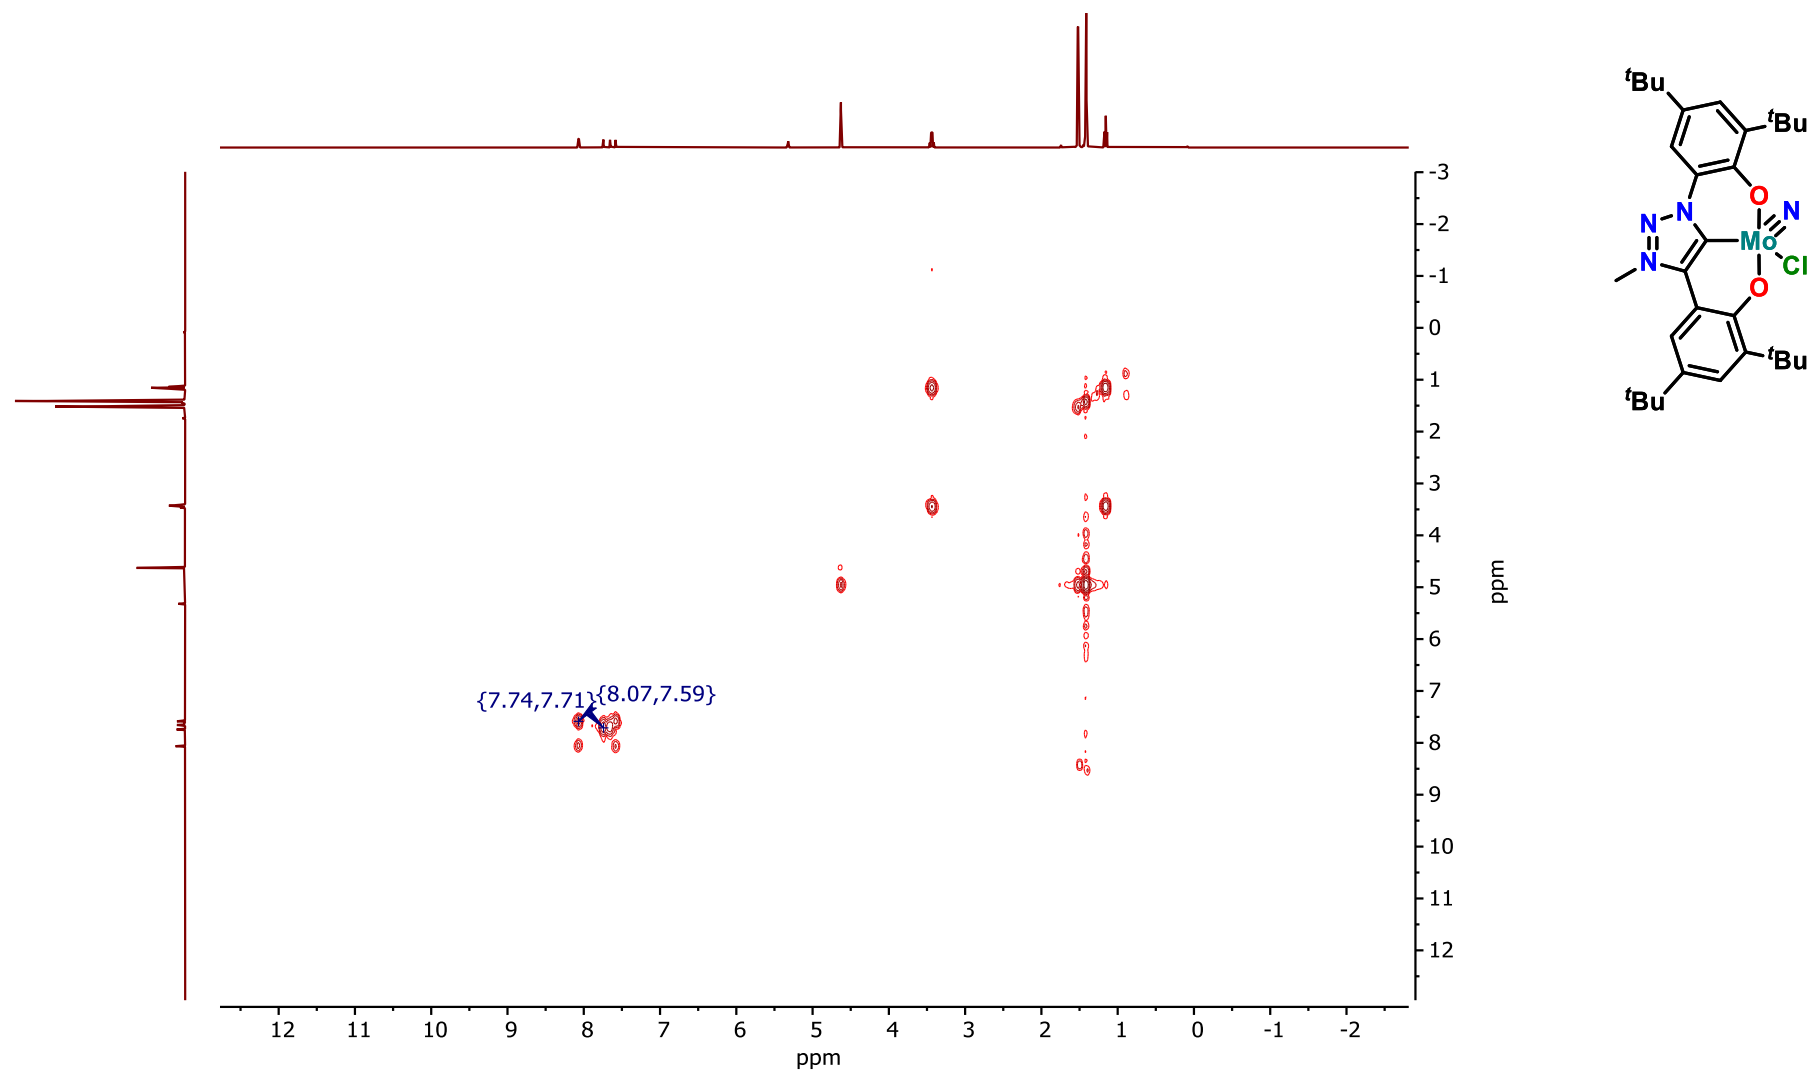

Figure S 3:  $^1\text{H}$  -  $^1\text{H}$  COSY of **1-Cl** in  $\text{CD}_2\text{Cl}_2$  at 298 K.



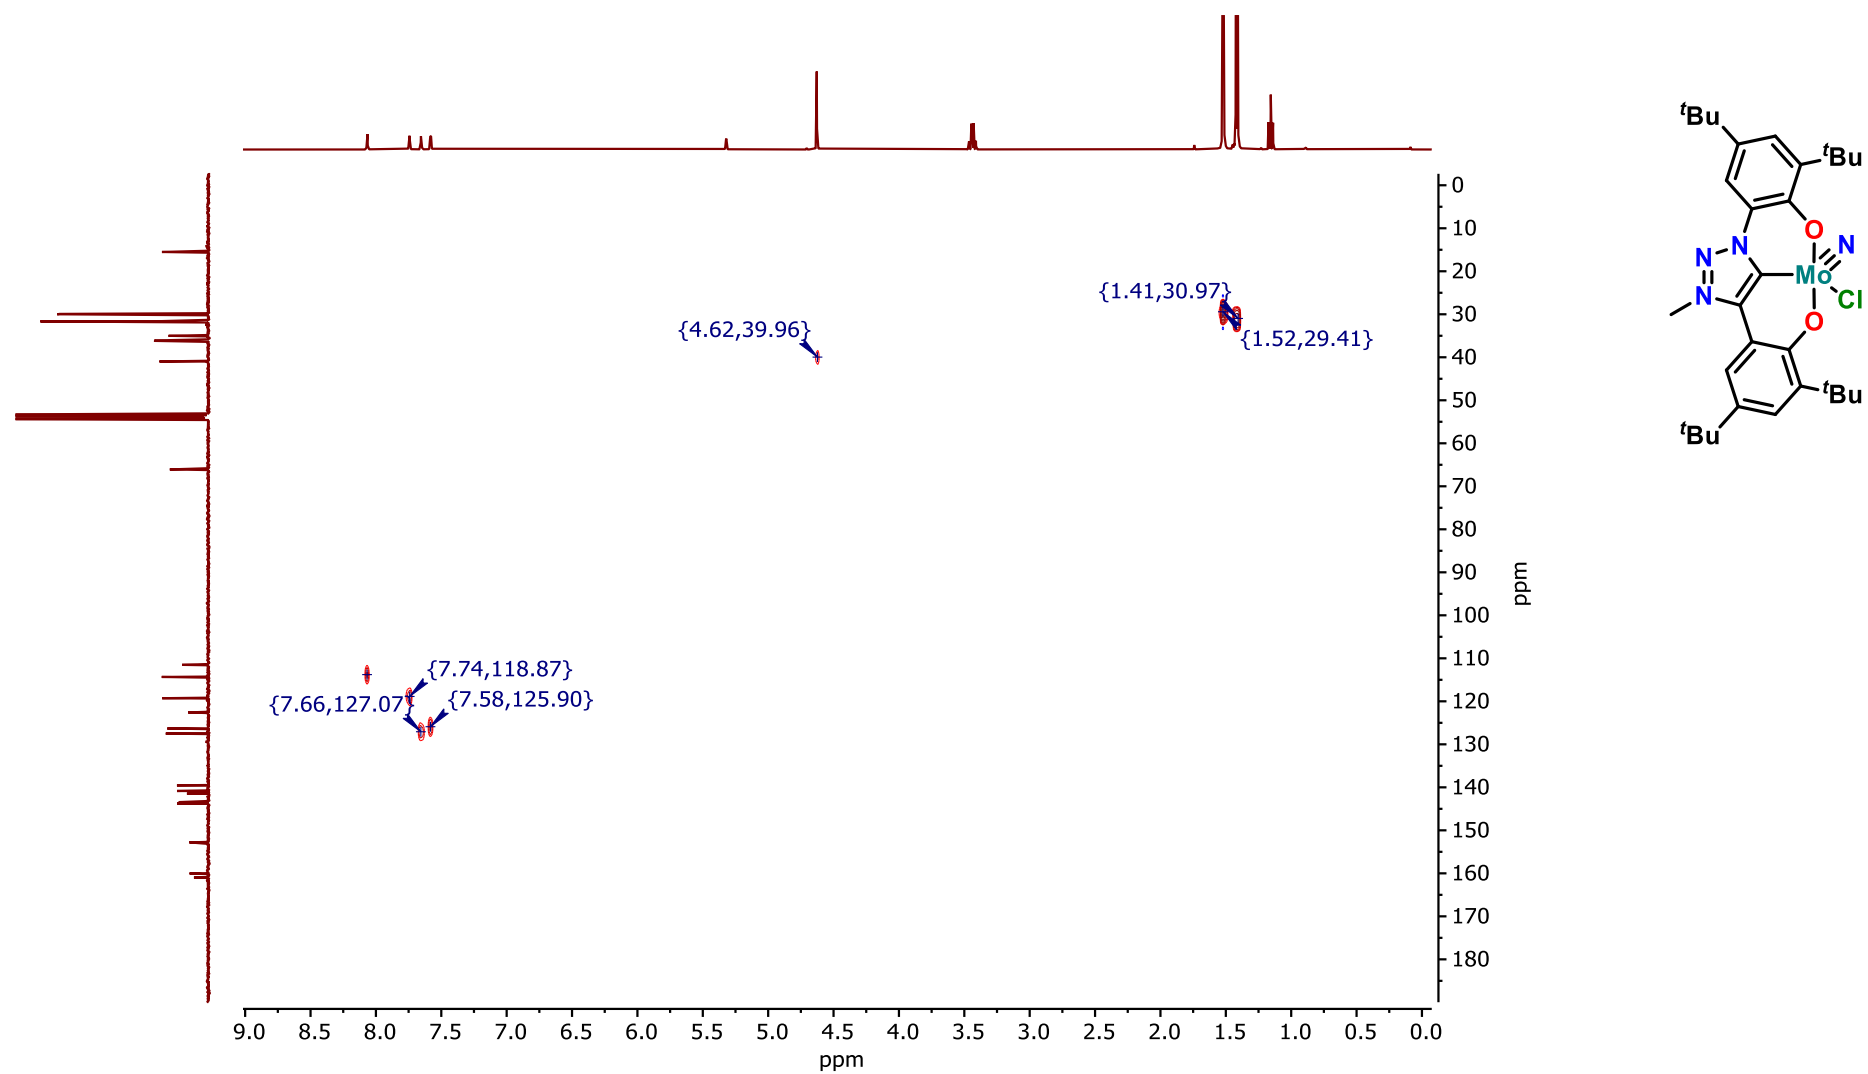

Figure S 4:  $^1\text{H} - ^{13}\text{C}$  HSQC of **1-Cl** in  $\text{CD}_2\text{Cl}_2$  at 298 K.

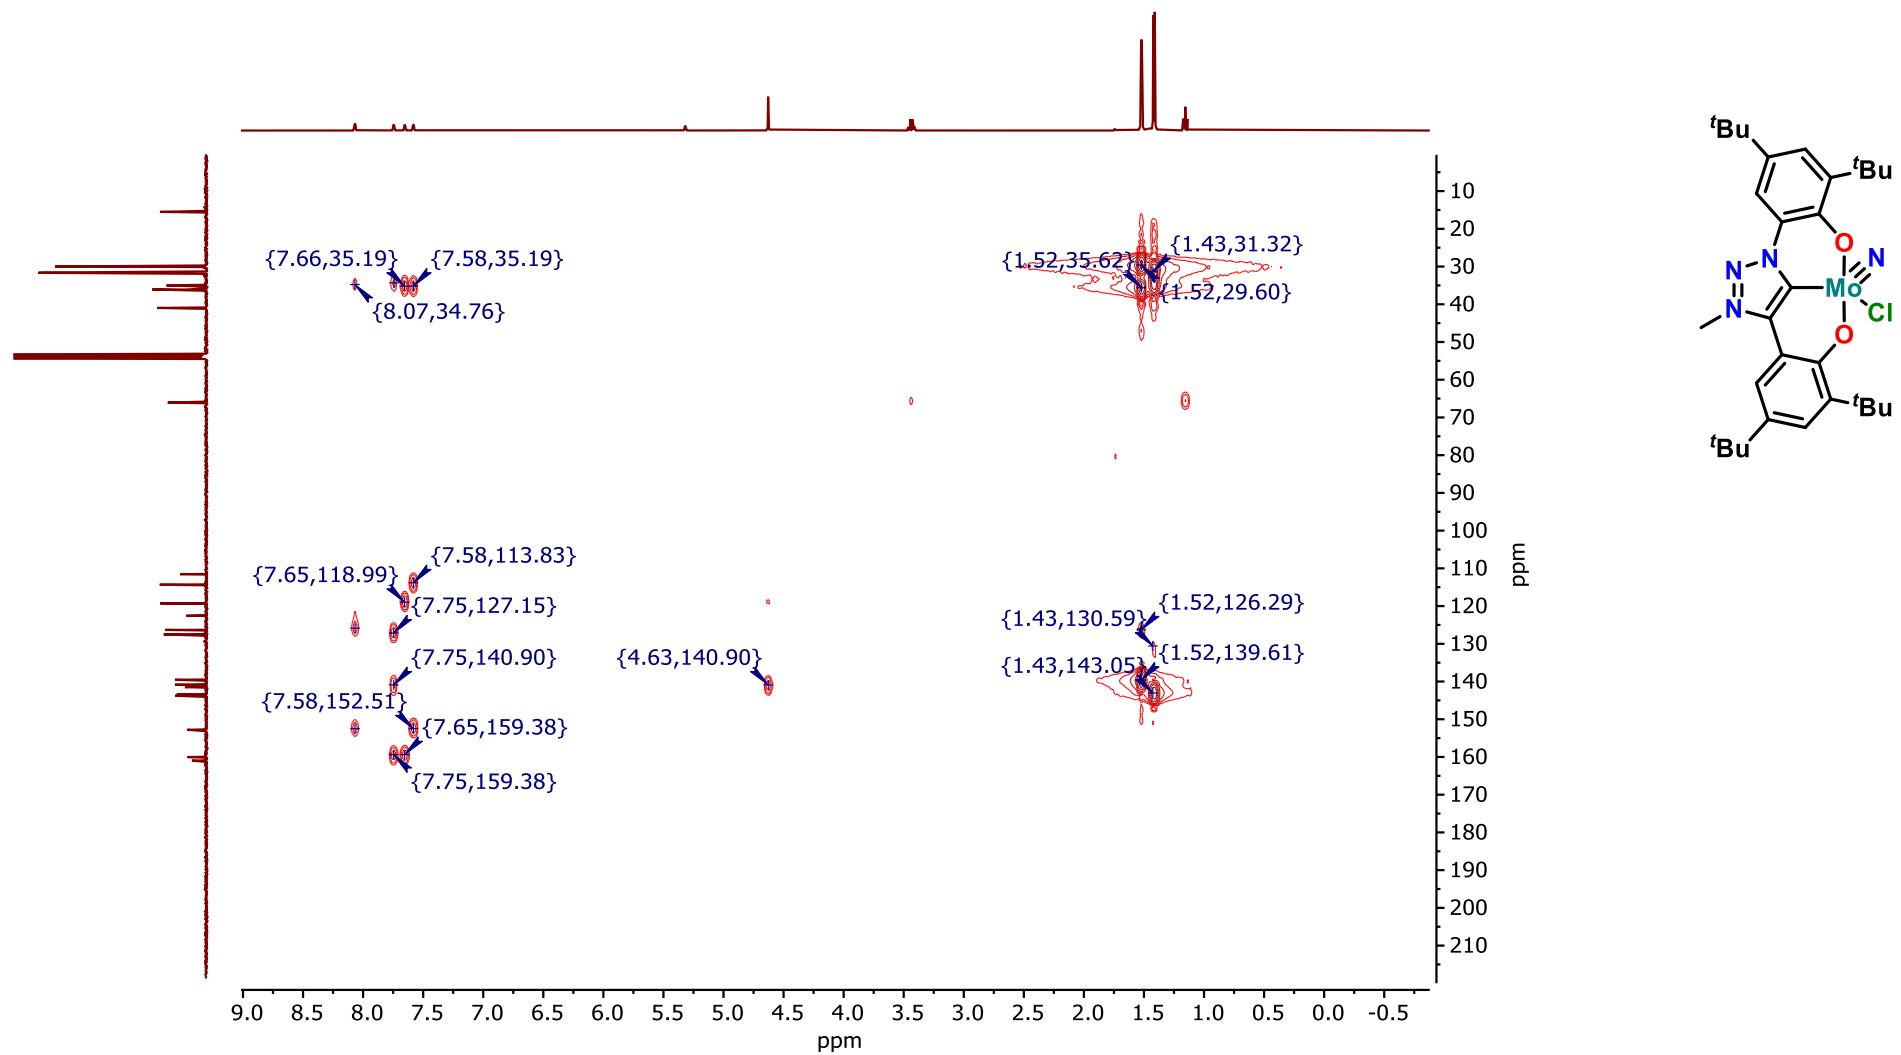

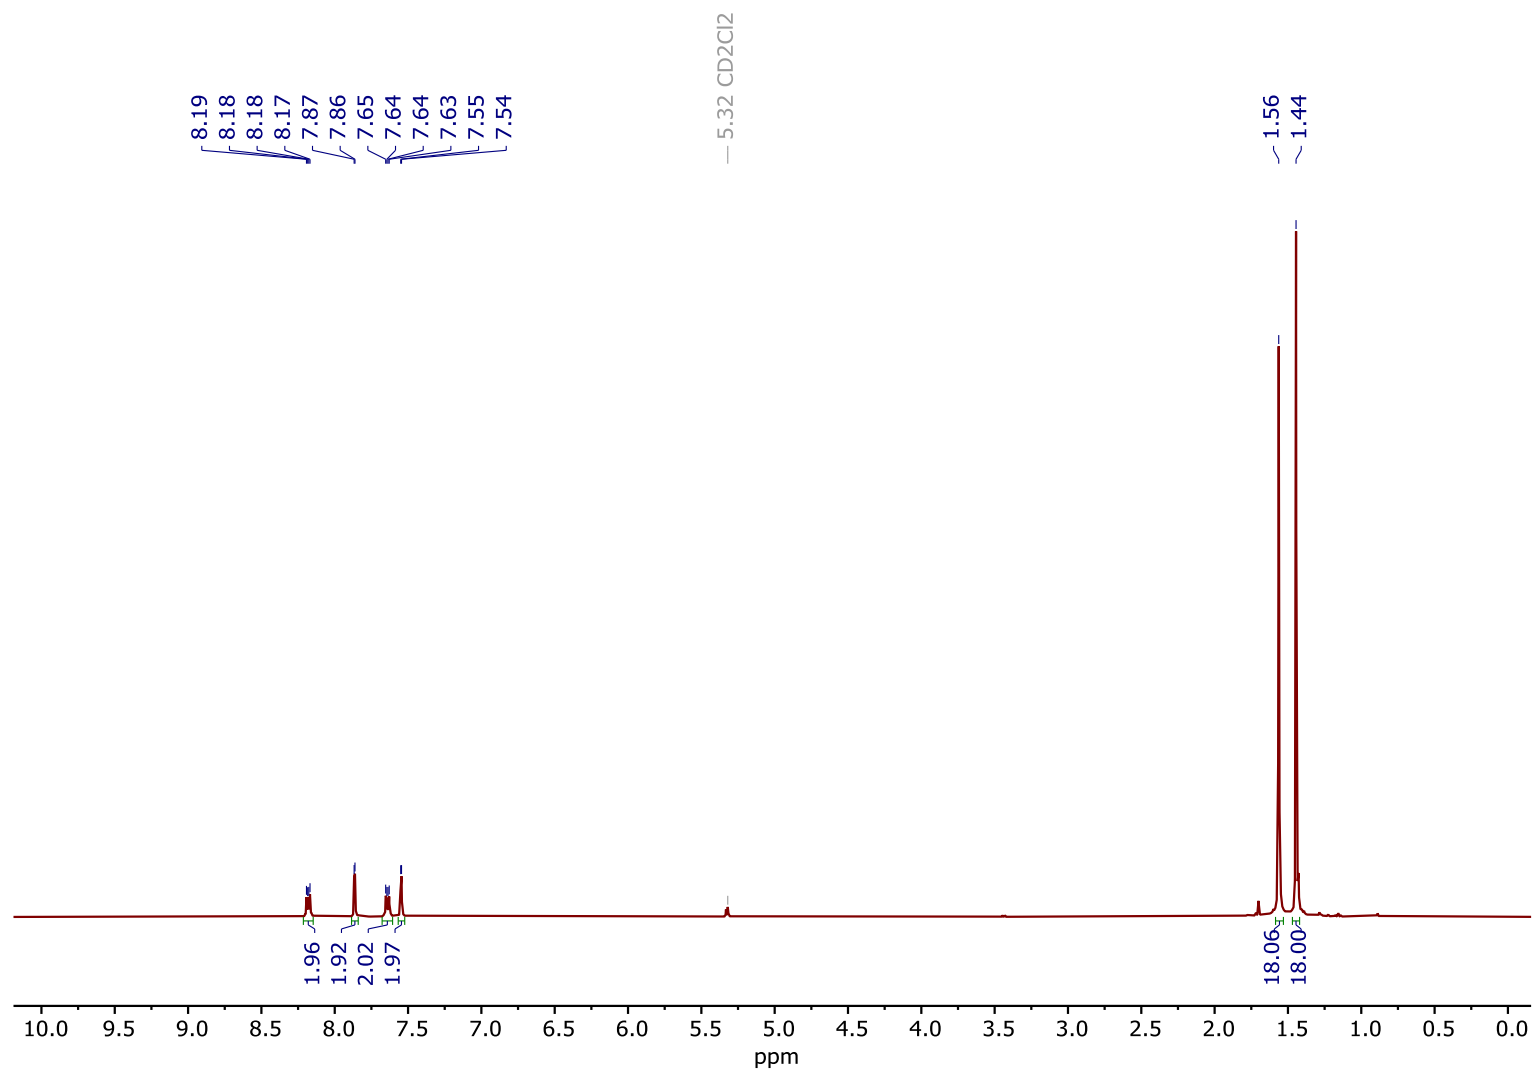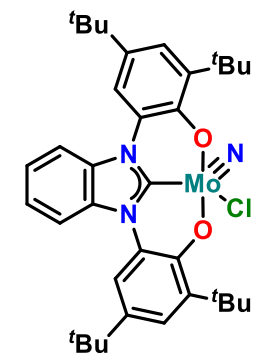

Figure S 6: <sup>1</sup>H NMR of **2-Cl** in CD<sub>2</sub>Cl<sub>2</sub> at 298 K.

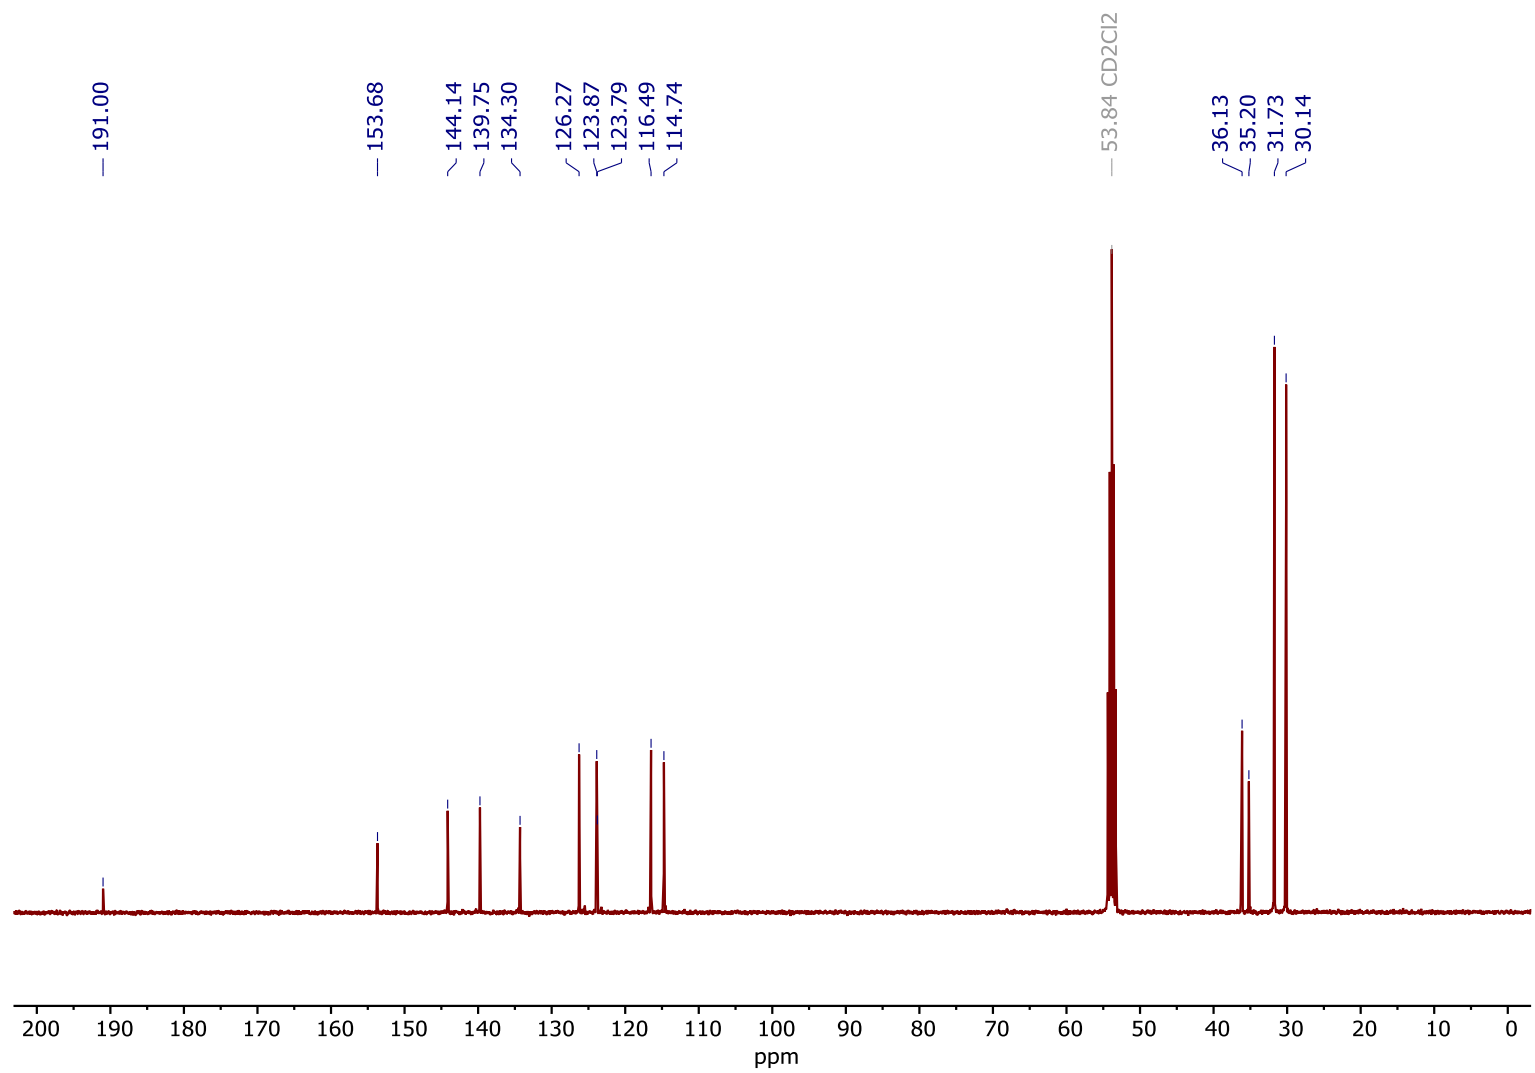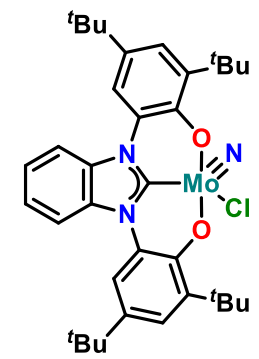

Figure S 7: <sup>13</sup>C NMR of **2-Cl** in CD<sub>2</sub>Cl<sub>2</sub> at 298 K.

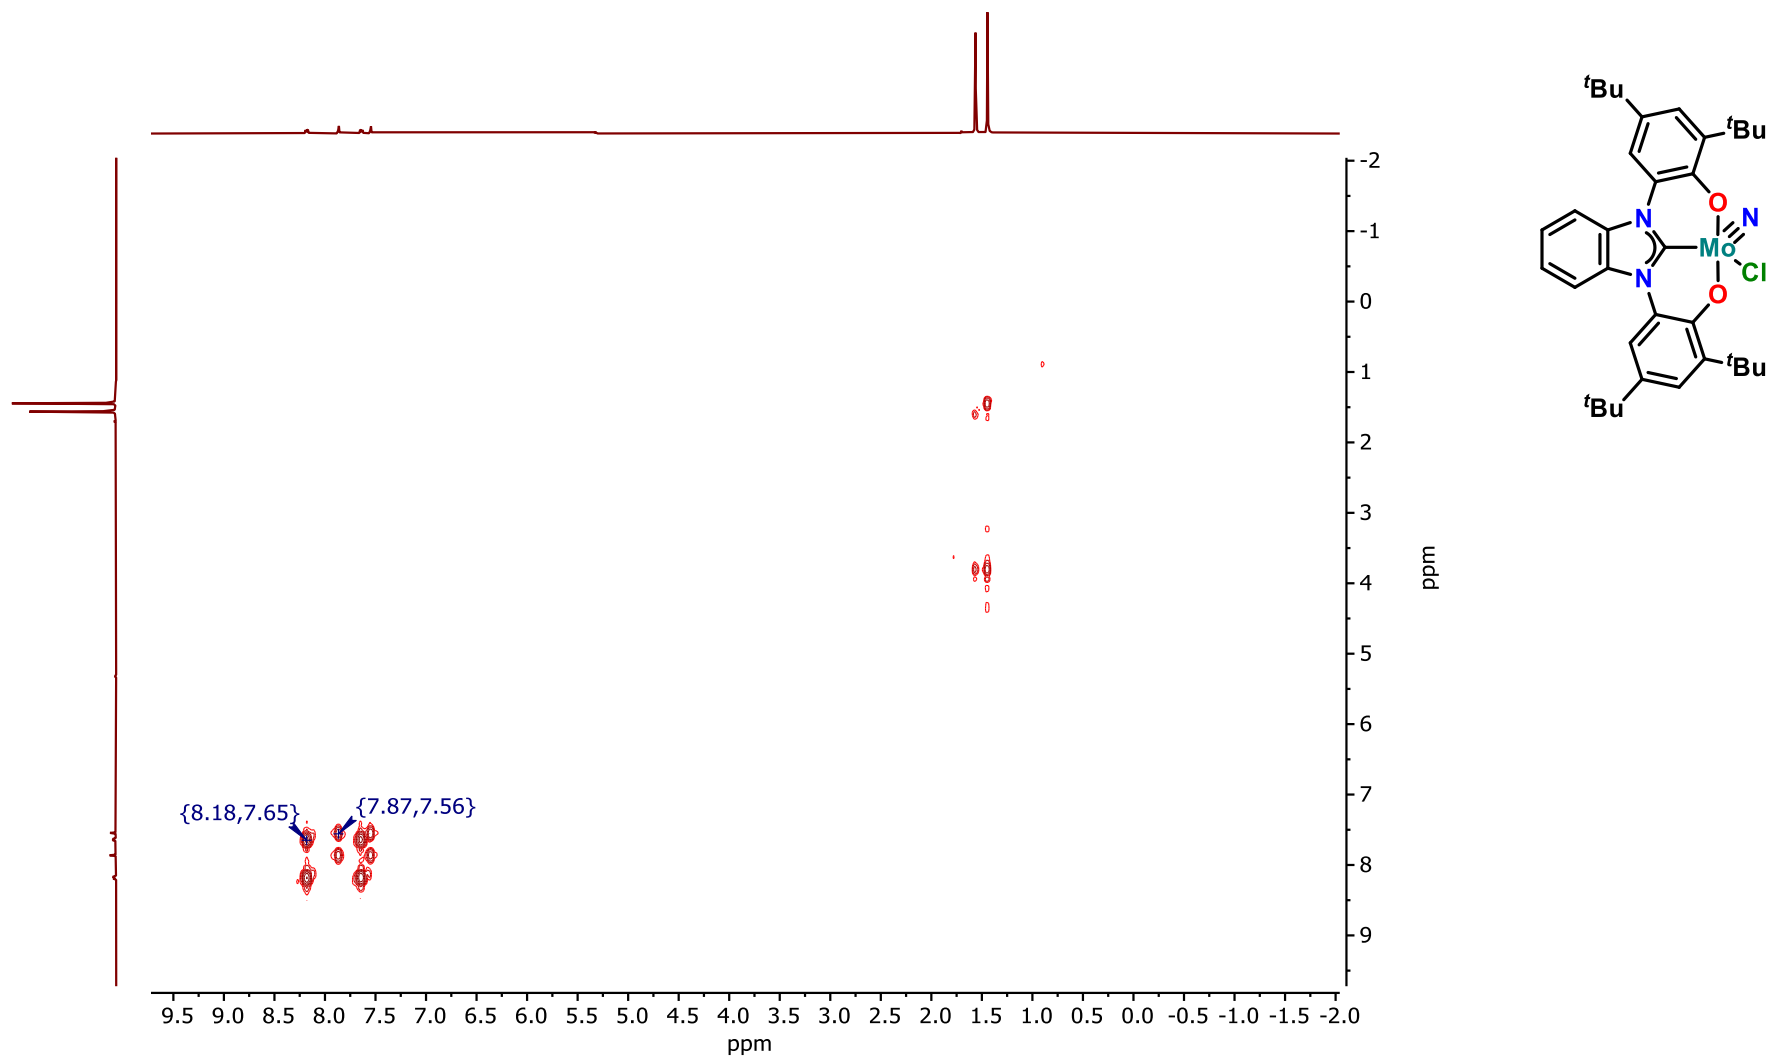

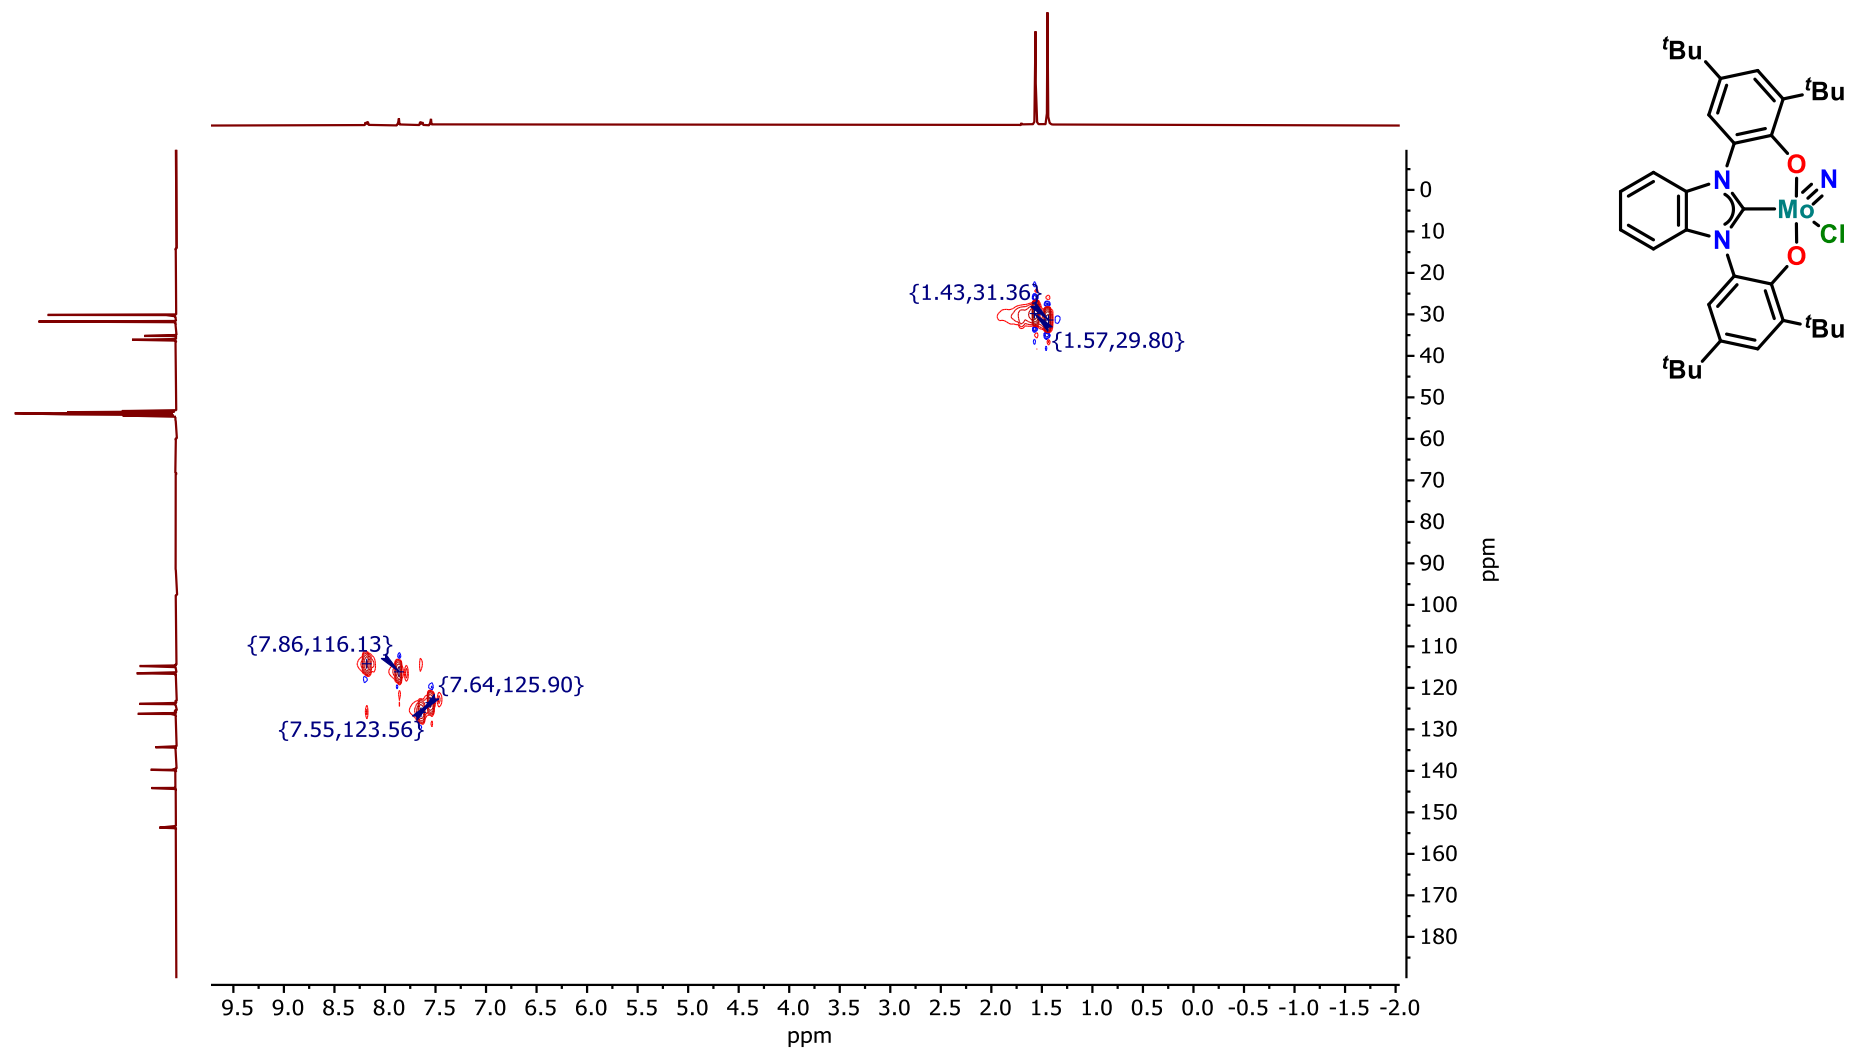

Figure S 9:  $^1\text{H} - ^{13}\text{C}$  HSQC of **2-Cl** in  $\text{CD}_2\text{Cl}_2$  at 298 K.

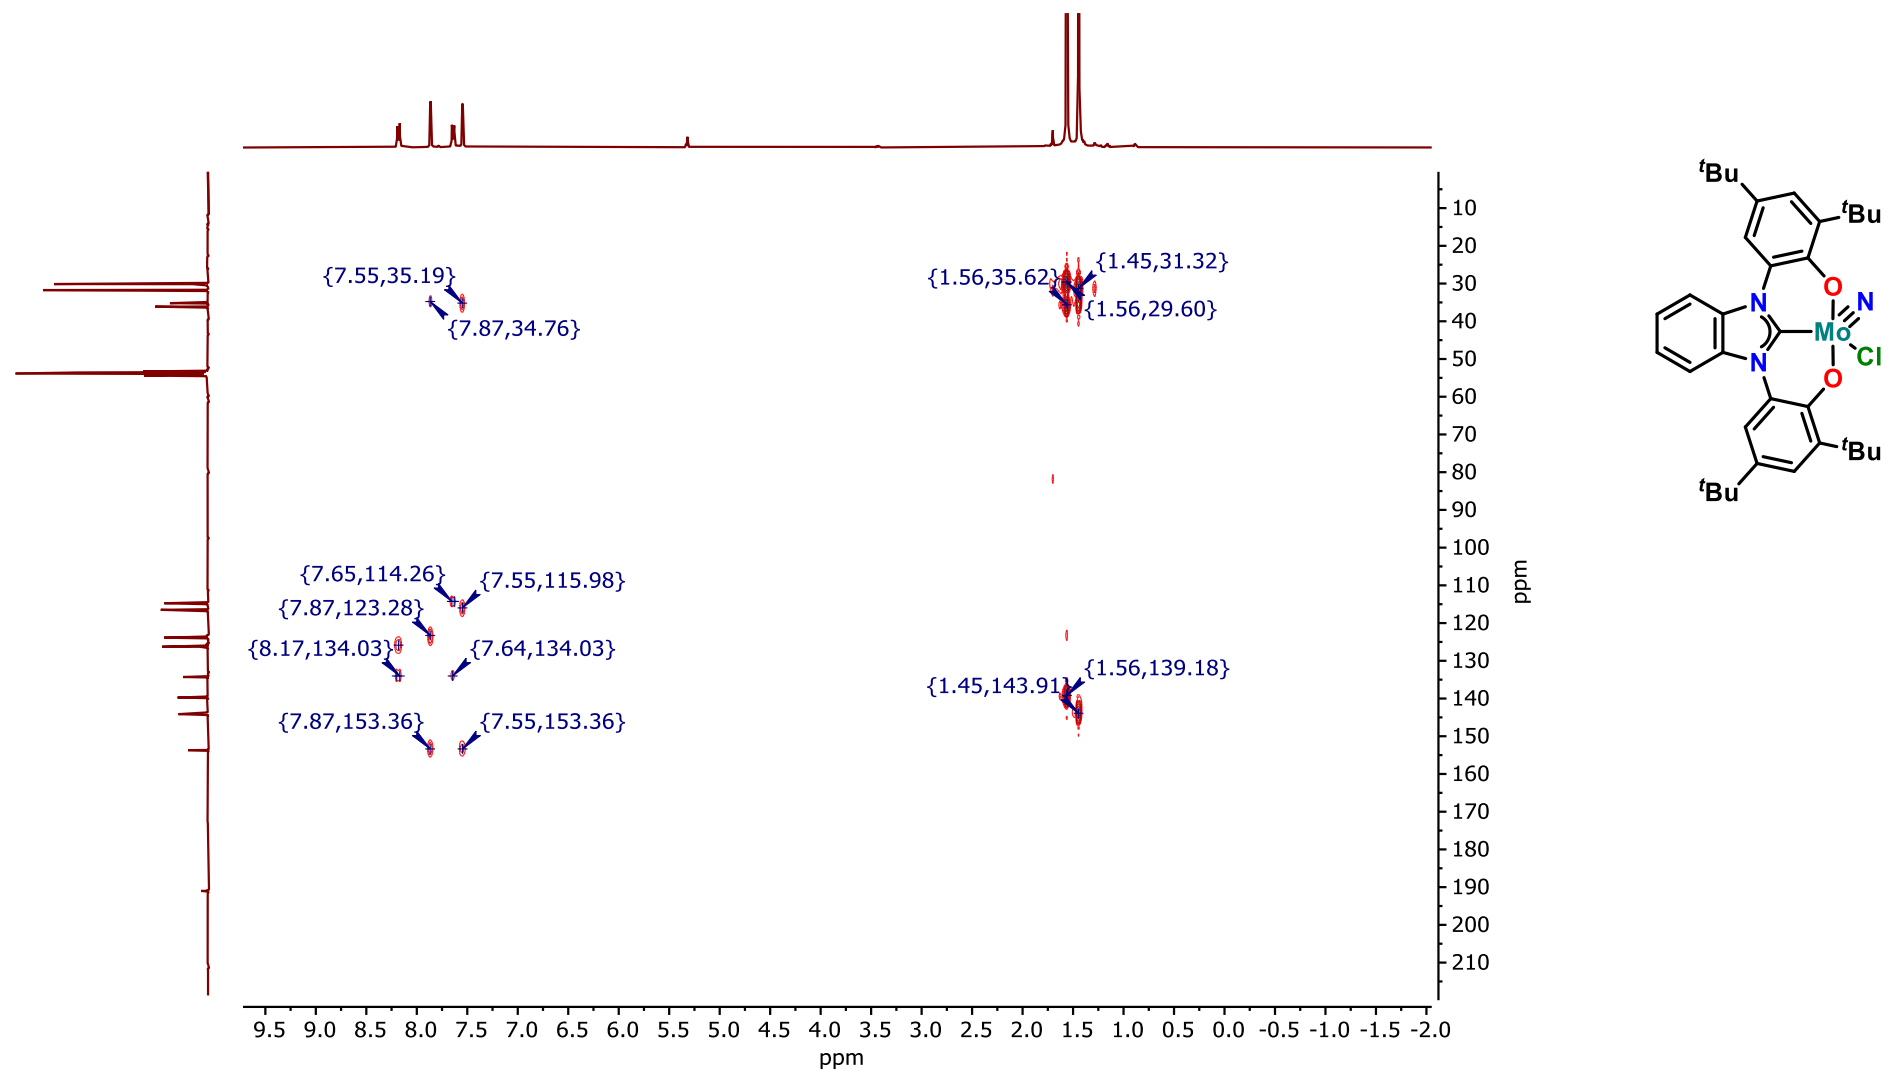

Figure S 10:  $^1\text{H} - ^{13}\text{C}$  HMBC of **2-Cl** in  $\text{CD}_2\text{Cl}_2$  at 298 K.

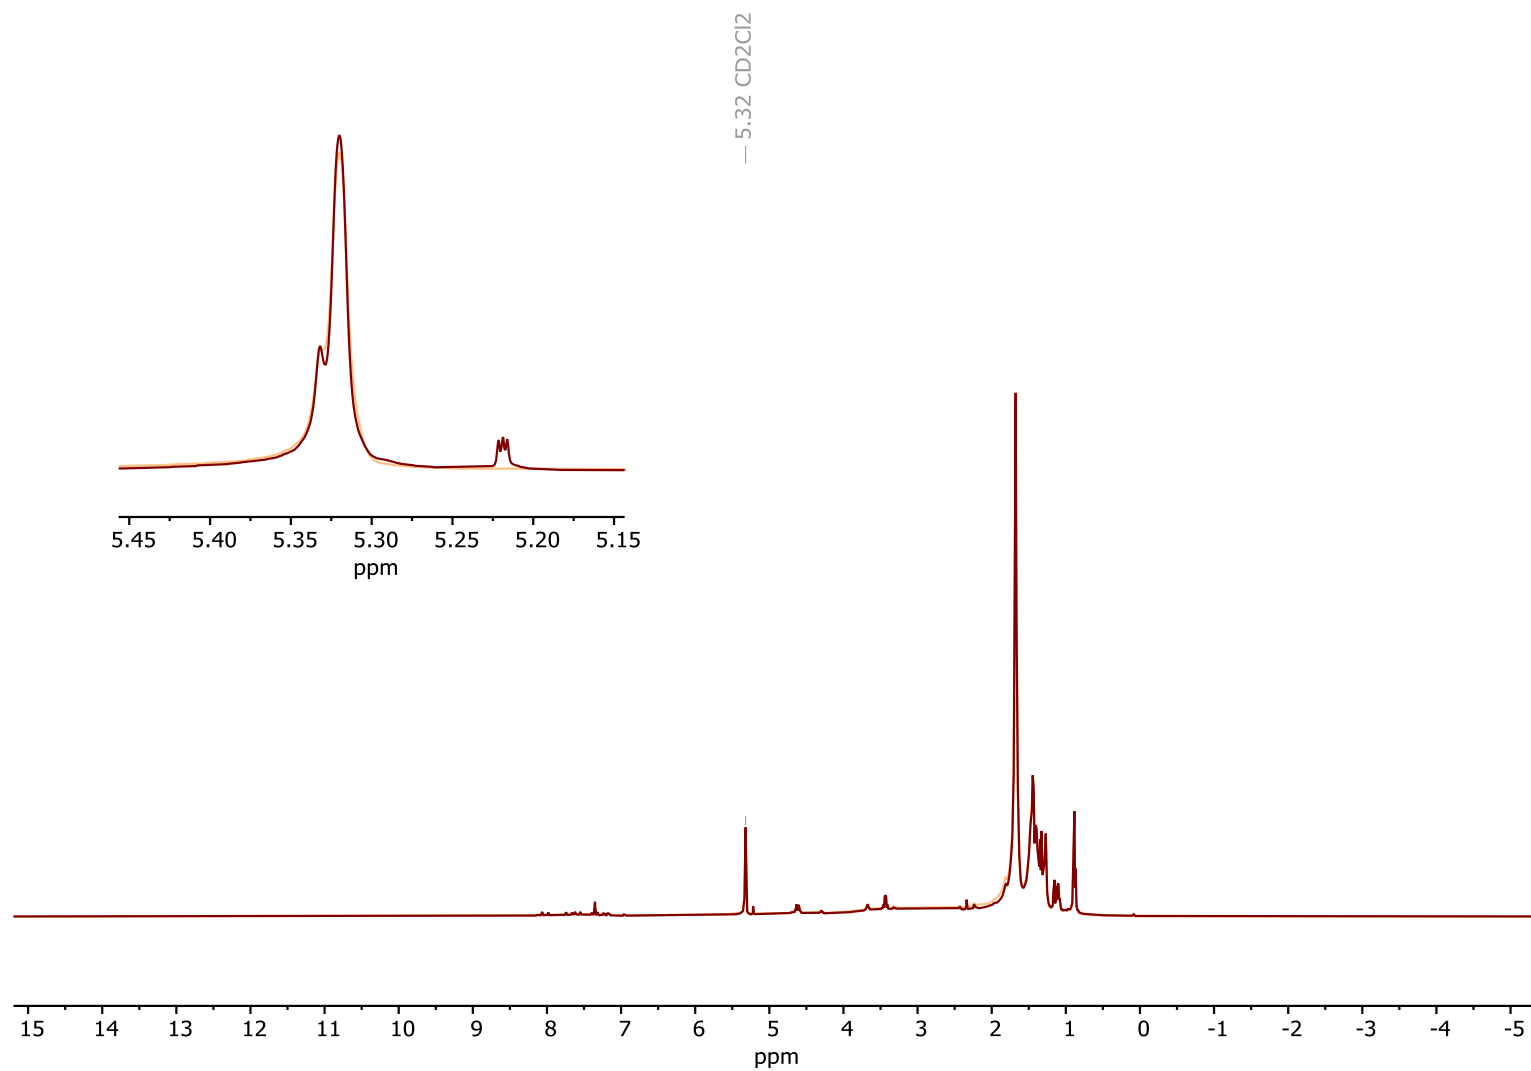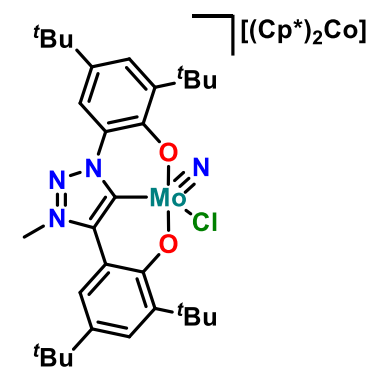

Figure S 11: <sup>1</sup>H NMR of **[1]<sup>-</sup>** without (orange) and with (maroon) a CD<sub>2</sub>Cl<sub>2</sub> capillary in CD<sub>2</sub>Cl<sub>2</sub> at 298 K.



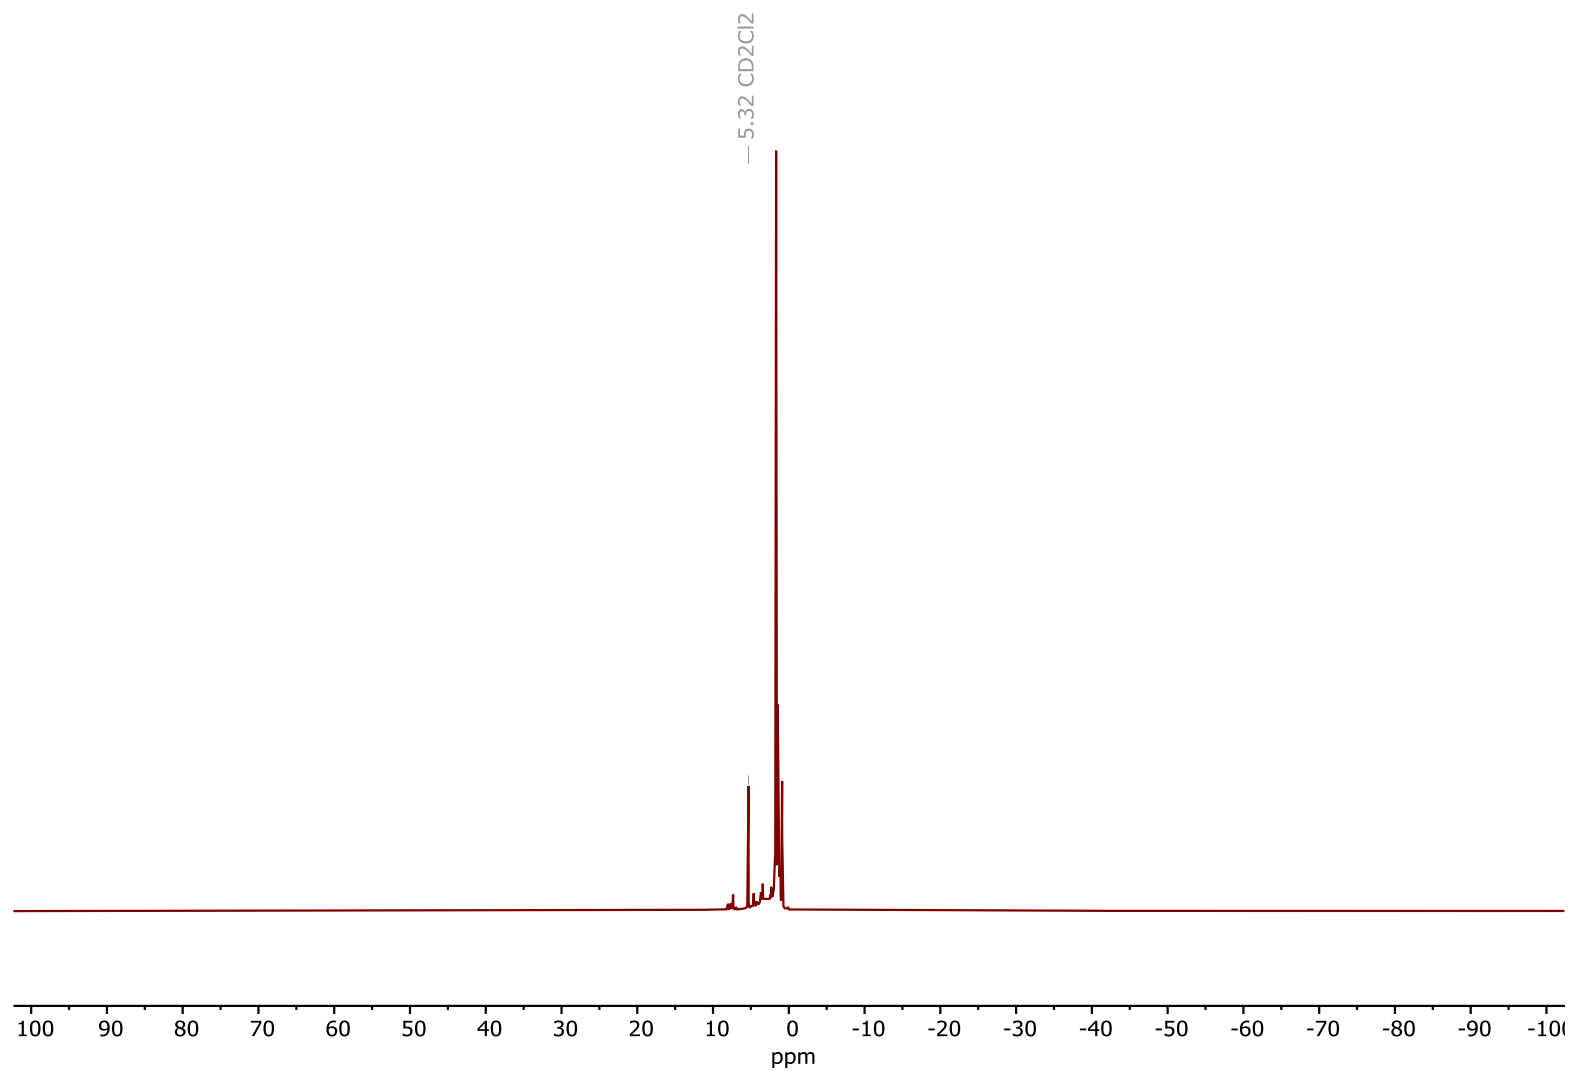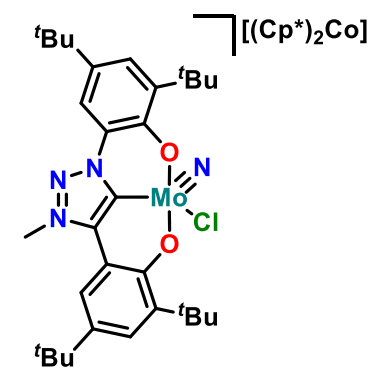

Figure S 12: <sup>1</sup>H NMR of **[1]** from -100 to 100 ppm in CD<sub>2</sub>Cl<sub>2</sub> at 298 K.

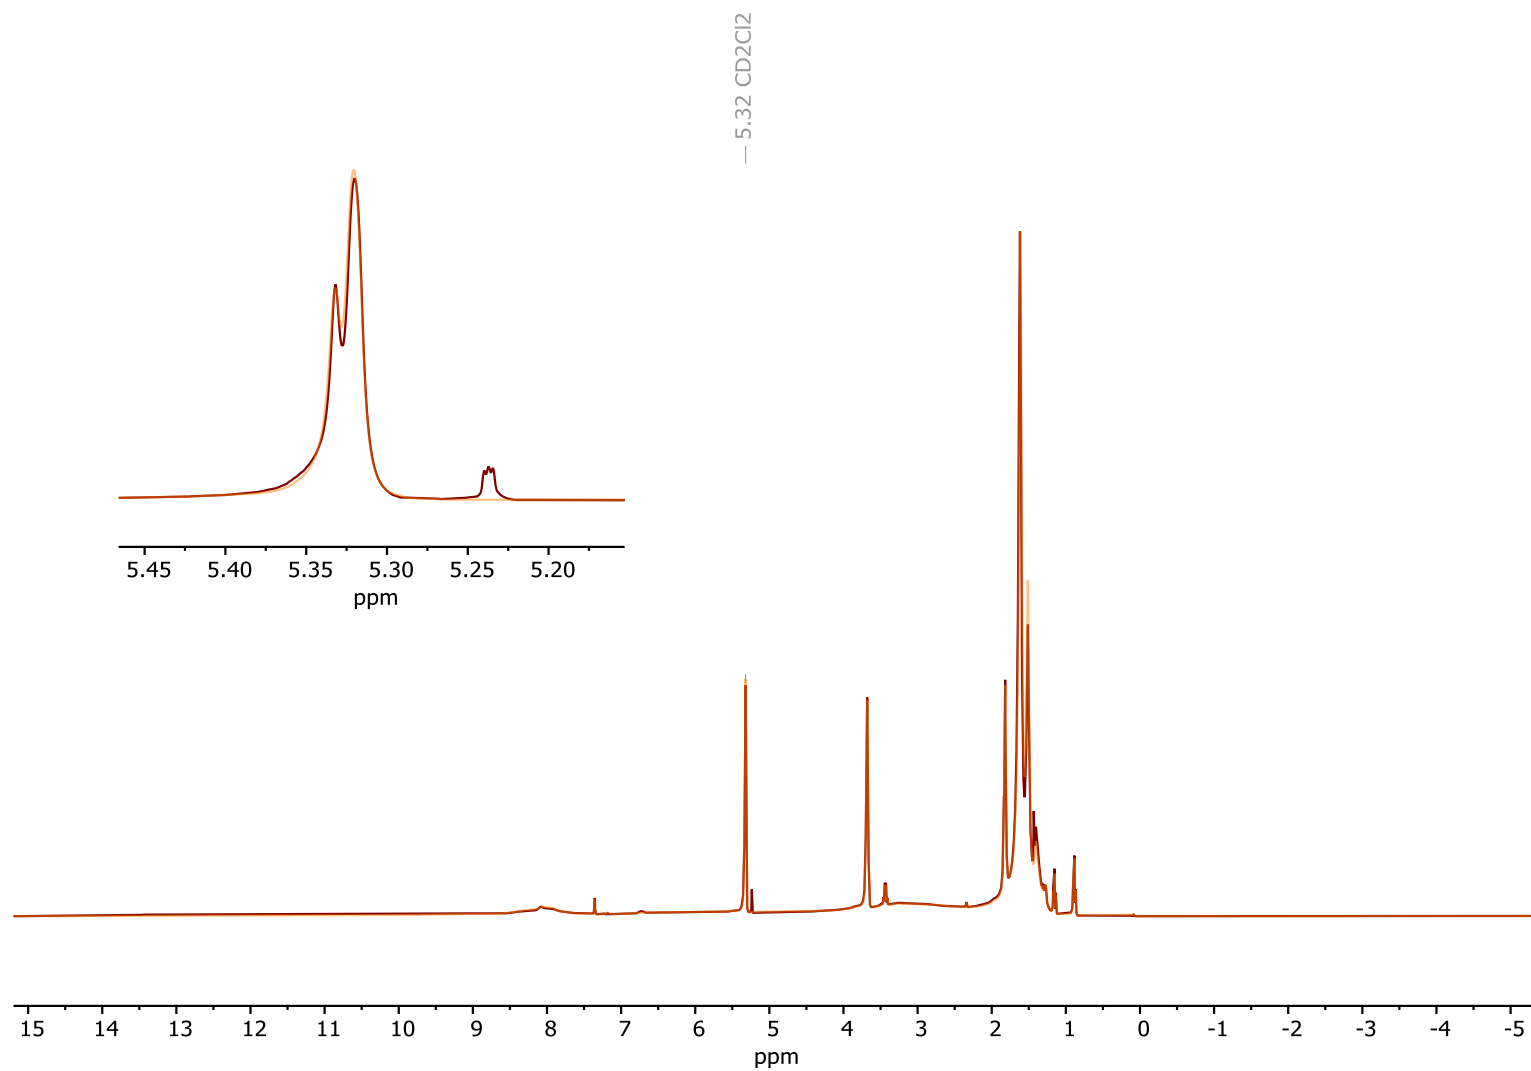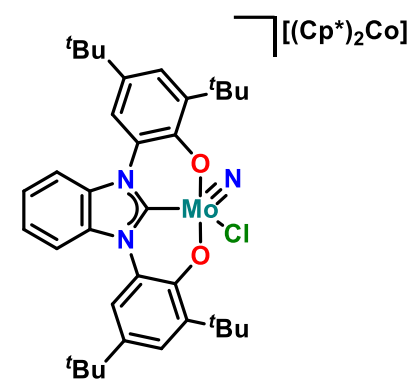

Figure S 13: <sup>1</sup>H NMR of **[2]** without (orange) and with (maroon) a CD<sub>2</sub>Cl<sub>2</sub> capillary in CD<sub>2</sub>Cl<sub>2</sub> at 298 K.

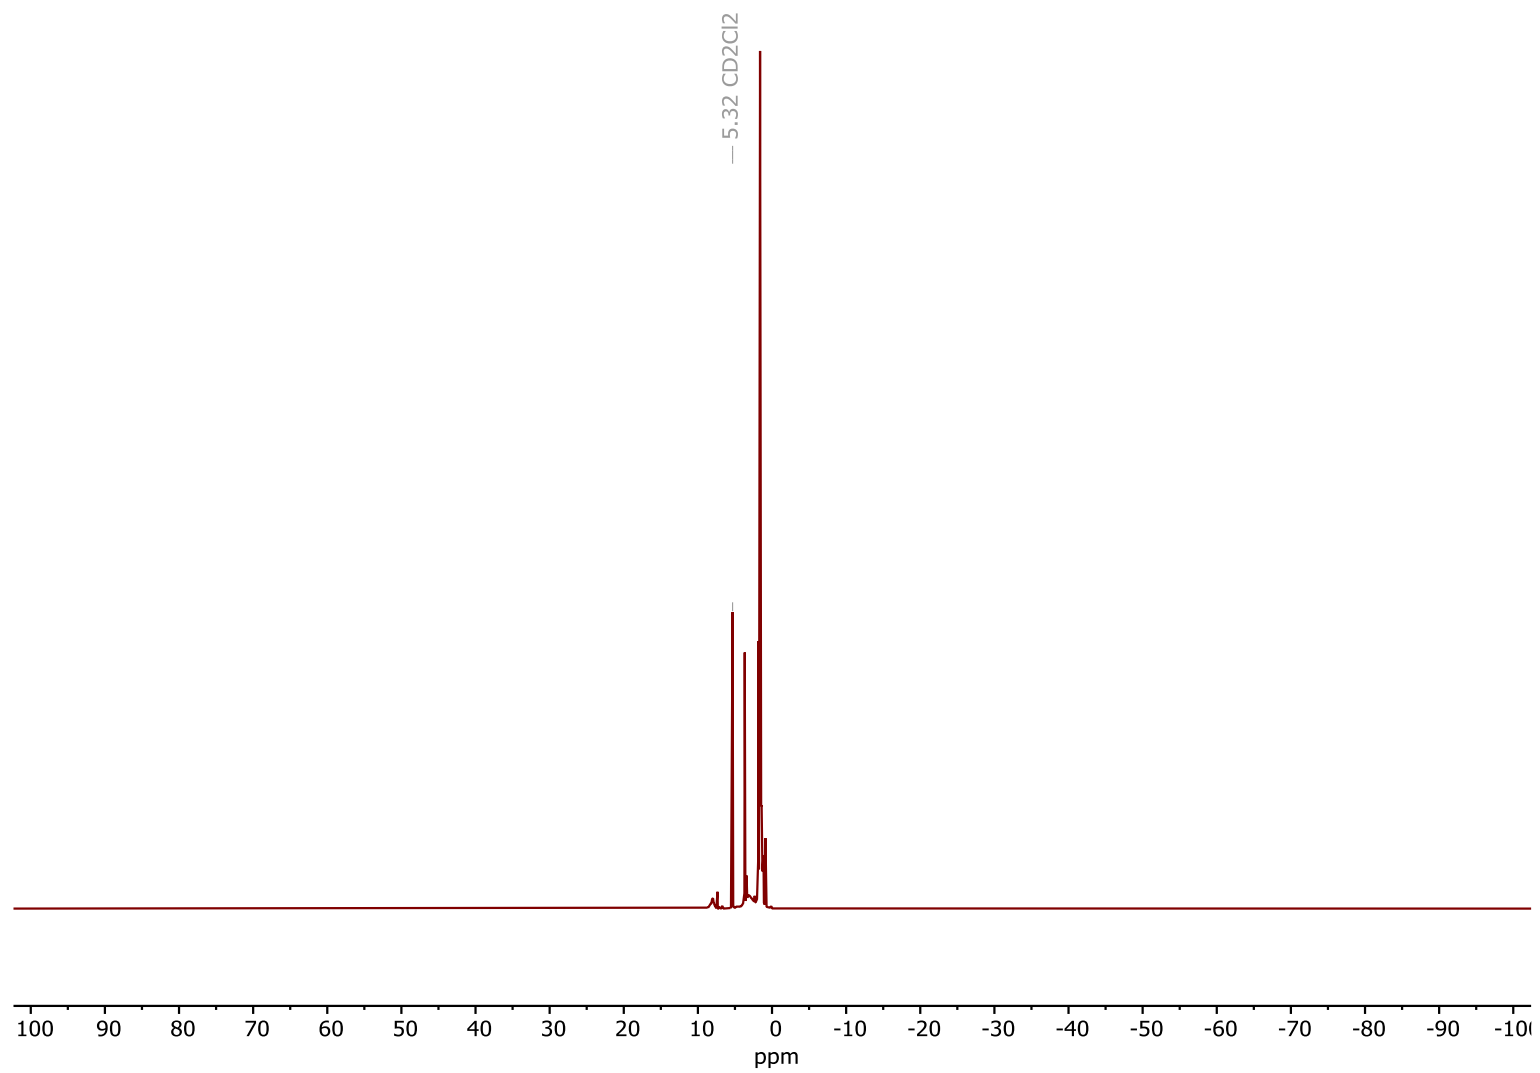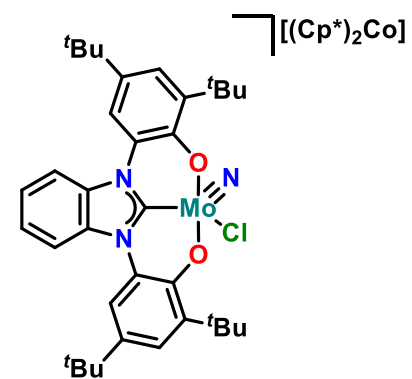

Figure S 14: <sup>1</sup>H NMR of **[2]** from -100 to 100 ppm in CD<sub>2</sub>Cl<sub>2</sub> at 298 K.

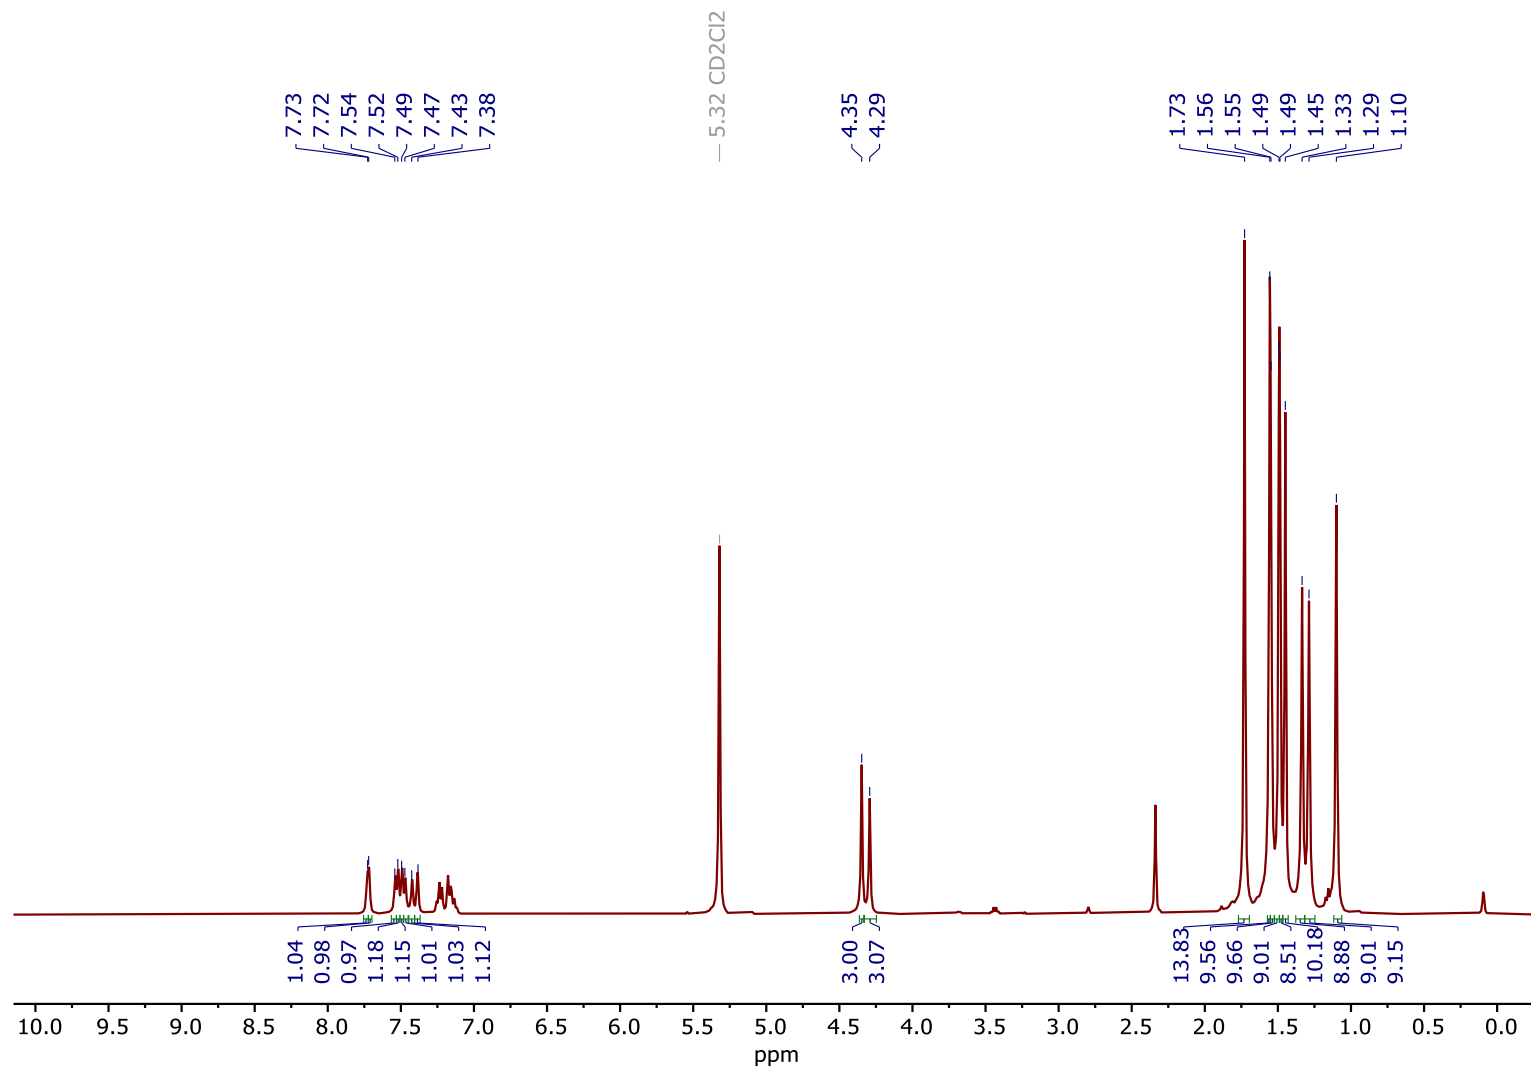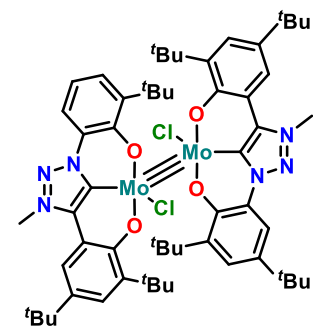

Figure S 15: <sup>1</sup>H NMR of dimer **3** in CD<sub>2</sub>Cl<sub>2</sub> at 298 K. The spectrum includes toluene from the crystallization and residual dcamethylcobaltocenium triflate (1.73 ppm, 13H).

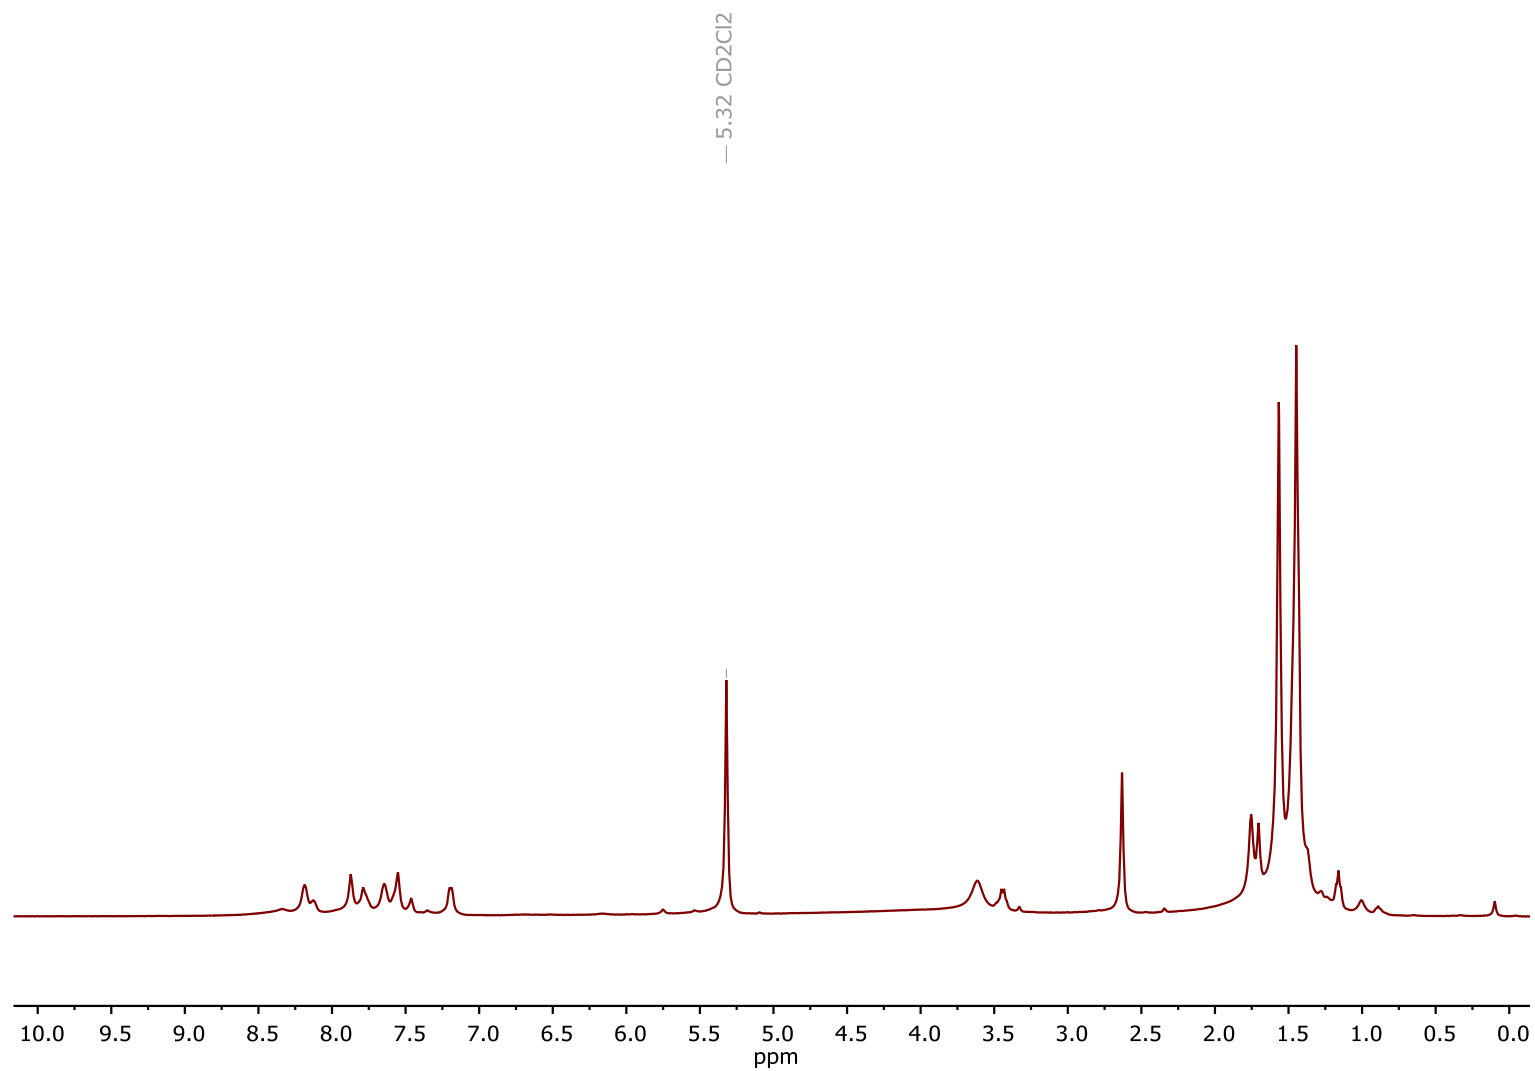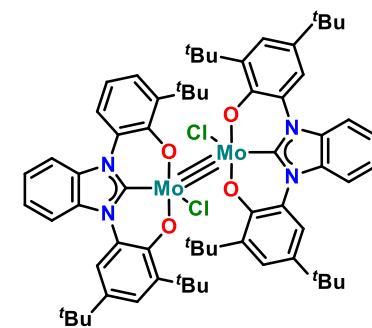

Figure S 16: Crude  $^1\text{H}$  NMR after reduction of **2-Cl** under protic conditions. The line broadening is attributed to paramagnetic impurities and no single species can be identified.

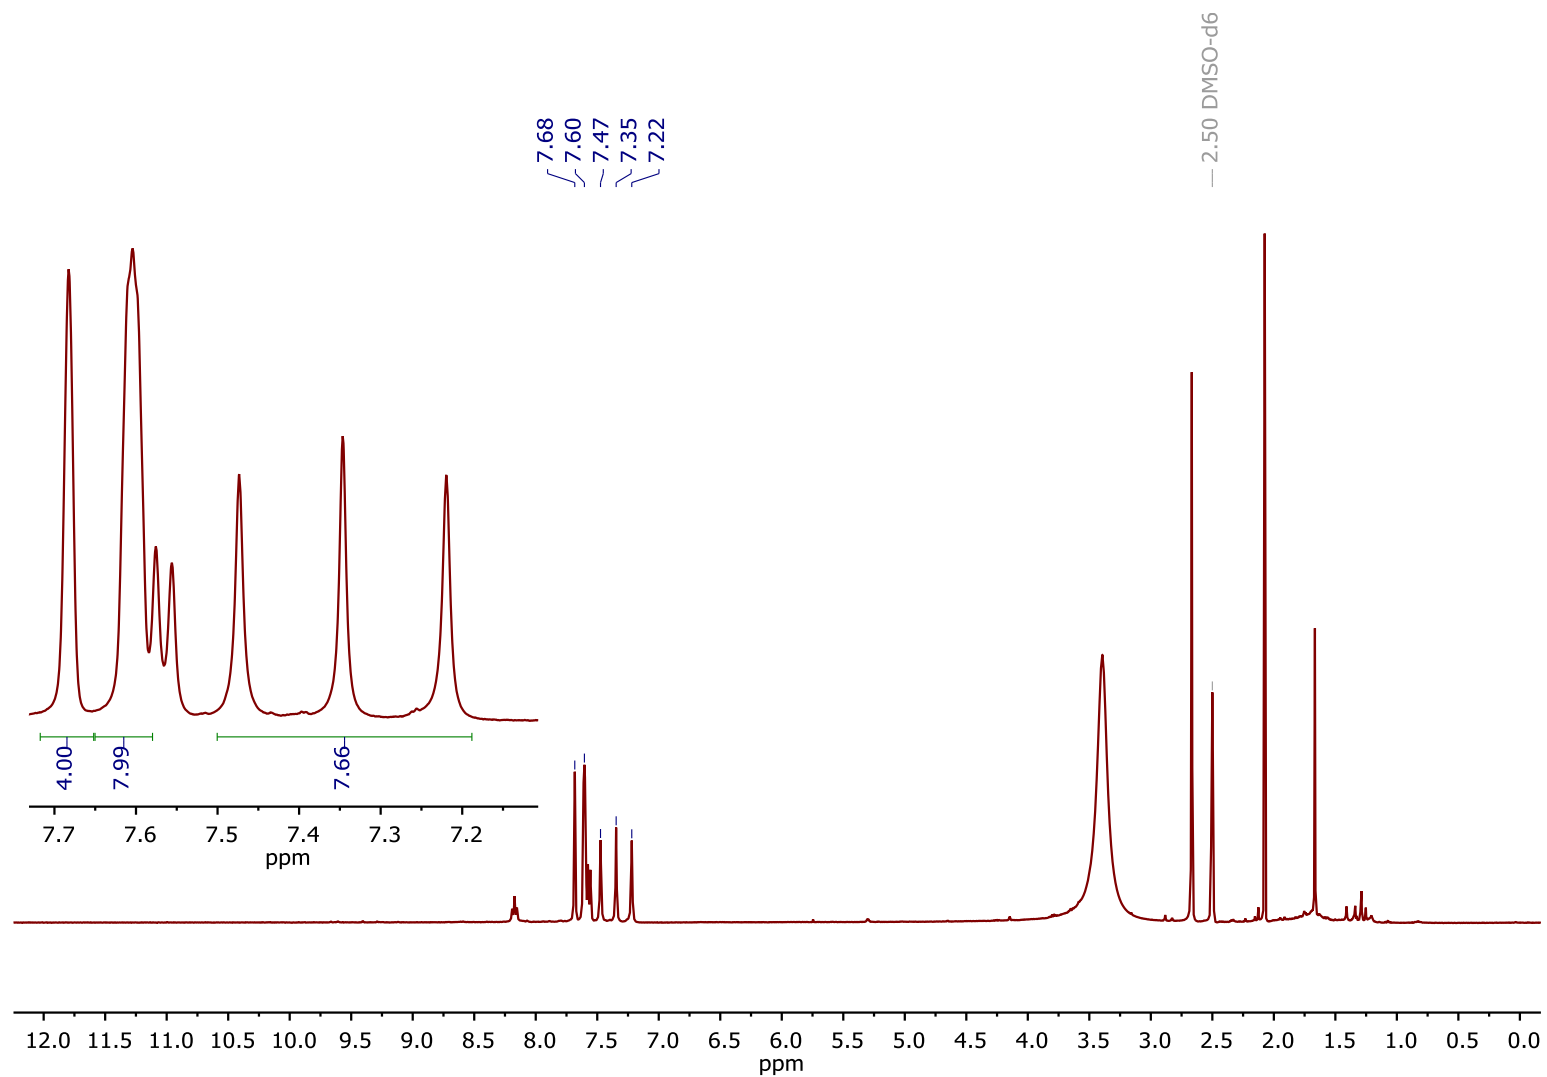

Figure S 17:  $^1\text{H}$  NMR in  $\text{DMSO-d}_6$  for ammonium quantification after aqueous workup of the reduction of **1-Cl** ( $39\ \mu\text{mol}$ ) under protic conditions. The inlay shows the characteristic ammonium triplet and  $\text{NaBARF}_{24}$  is used as an internal standard ( $17.7\ \text{mg}$ ,  $20\ \mu\text{mol}$ ). The signals at 8.17, 7.57 and 2.67 result from residual lutidine, the signals at 2.07 belongs to residual acetone, while the signal at 1.66 is an unknown impurity.

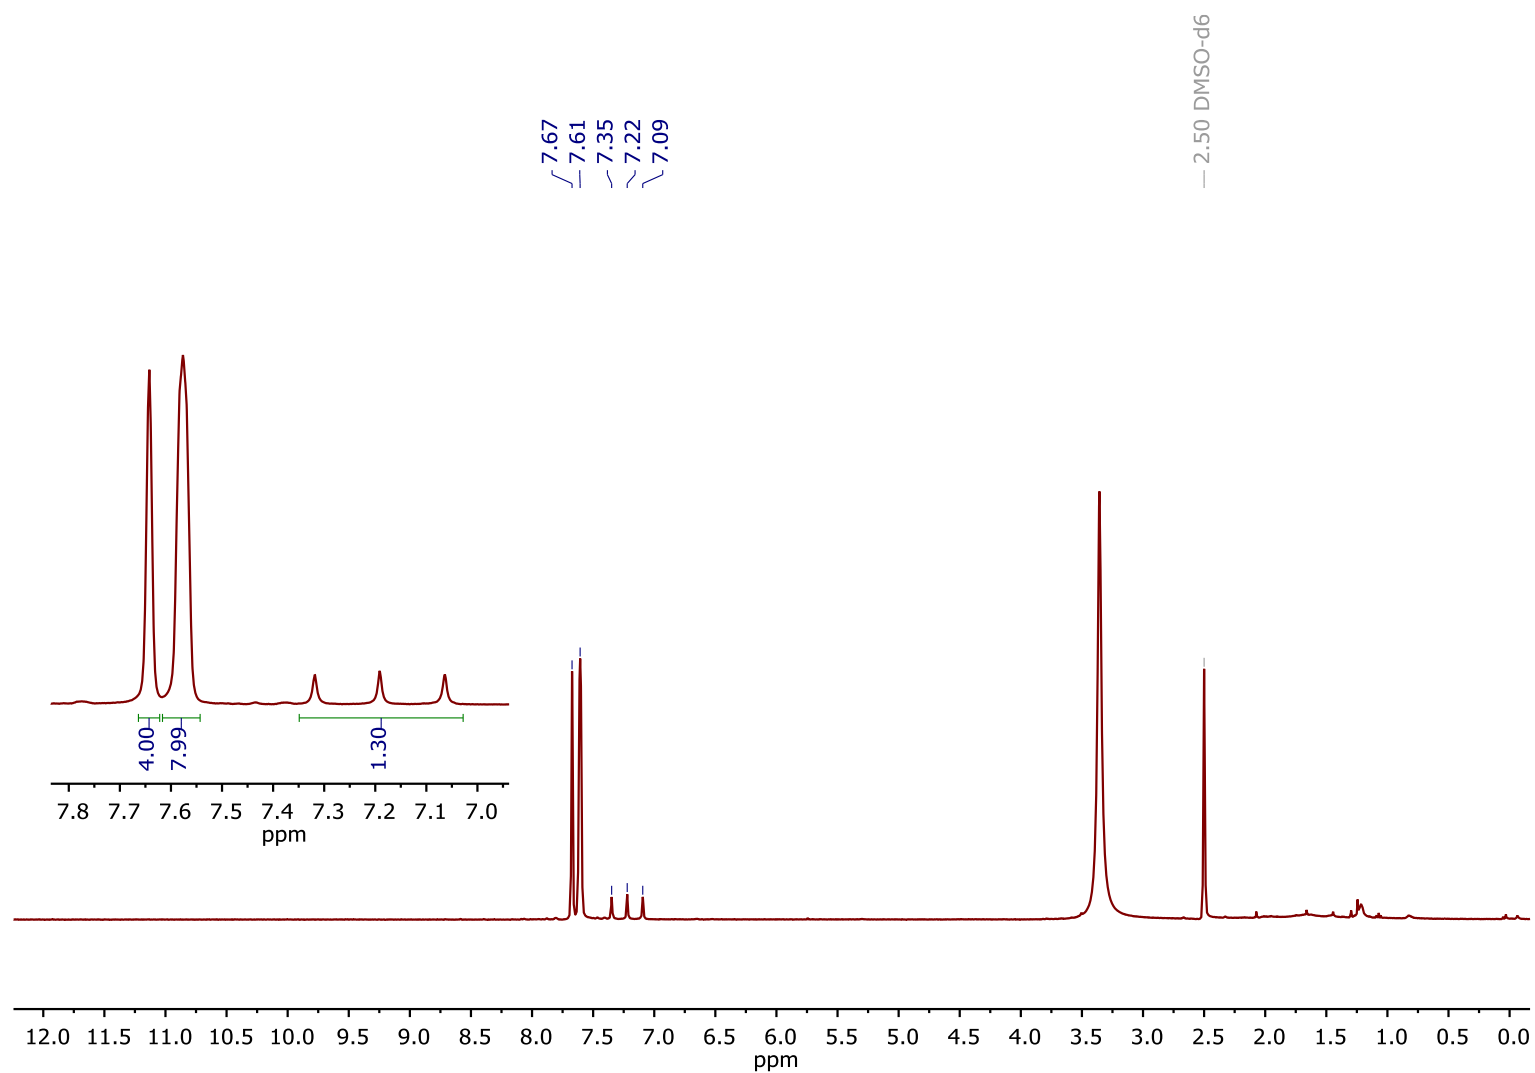

Figure S 18:  $^1\text{H}$  NMR in  $\text{DMSO-d}_6$  for ammonium quantification after aqueous workup of the reduction of **2-Cl** ( $37\ \mu\text{mol}$ ) under protic conditions. The inset shows the characteristic ammonium triplet and  $\text{NaBARF}_{24}$  is used as an internal standard ( $17.7\ \text{mg}$ ,  $20\ \mu\text{mol}$ ).

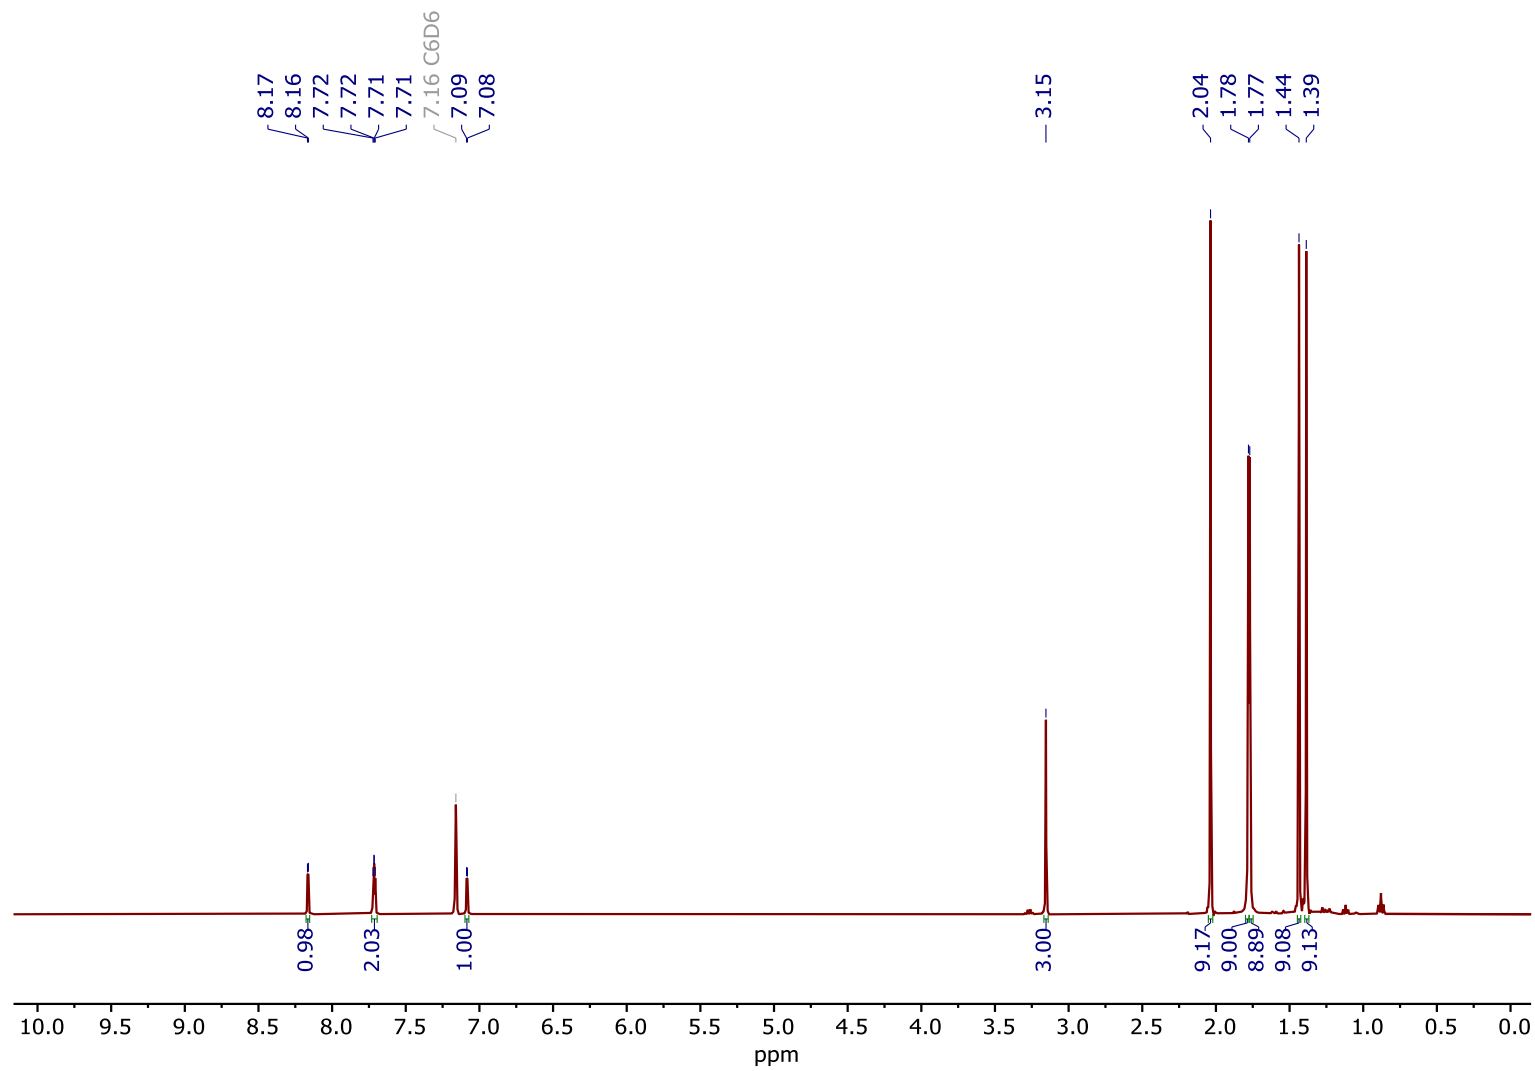

Figure S 19:  $^1\text{H}$  NMR of **1-O<sup>t</sup>Bu** in  $\text{C}_6\text{D}_6$  at 298 K.

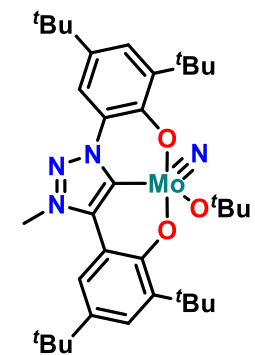



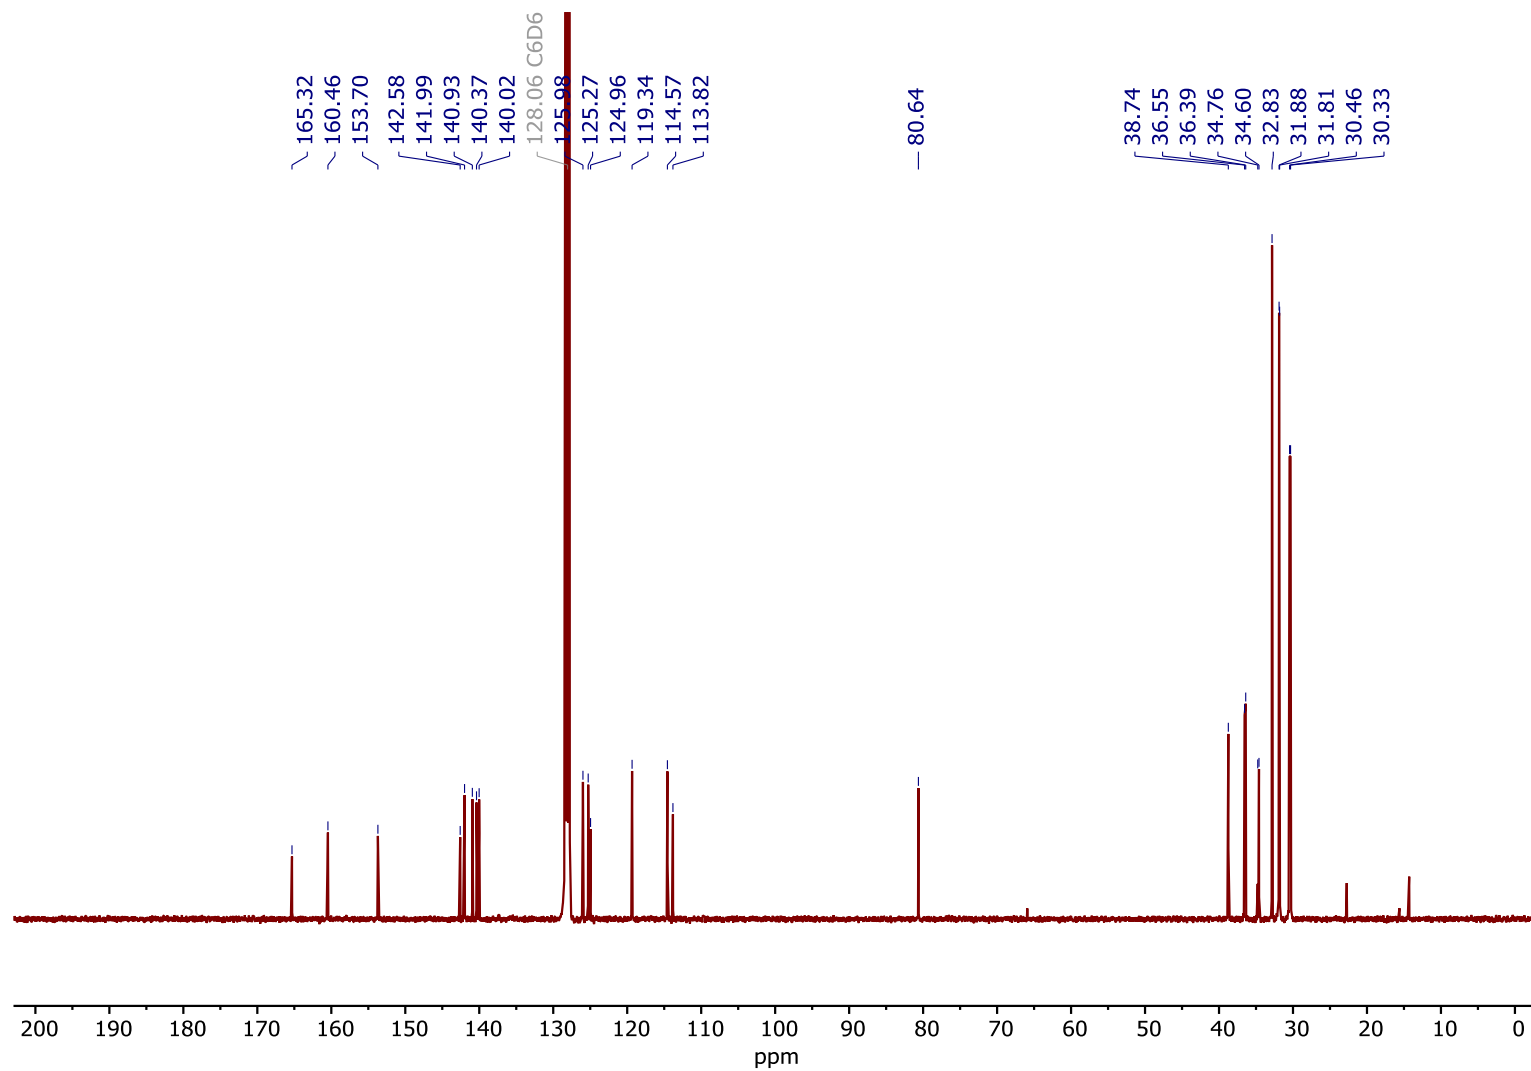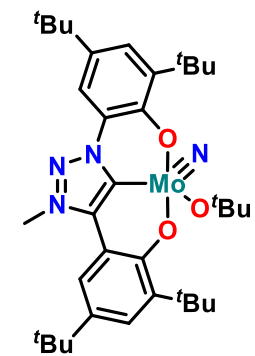

Figure S 20:  $^{13}\text{C}$  NMR of **1-O<sup>t</sup>Bu** in  $\text{C}_6\text{D}_6$  at 298 K.

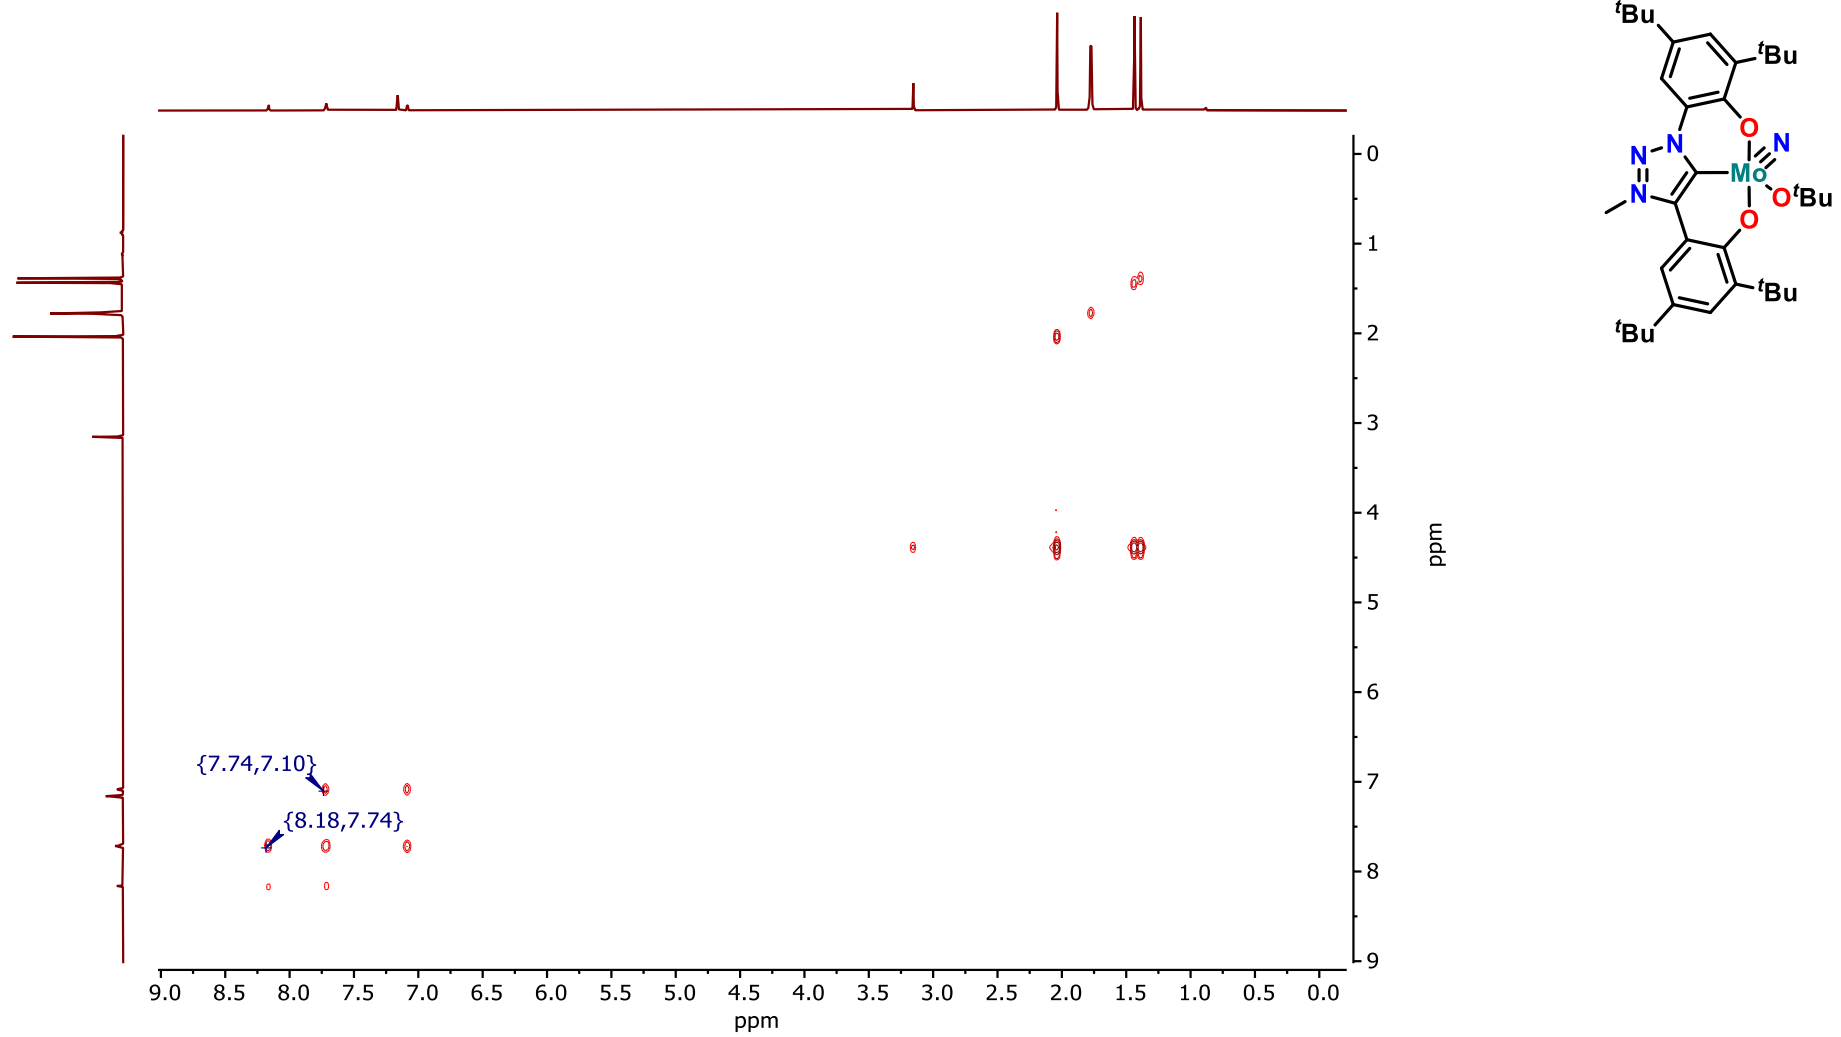

Figure S 21:  $^1\text{H}$  -  $^1\text{H}$  COSY of **1-O<sup>t</sup>Bu** in  $\text{C}_6\text{D}_6$  at 298 K.

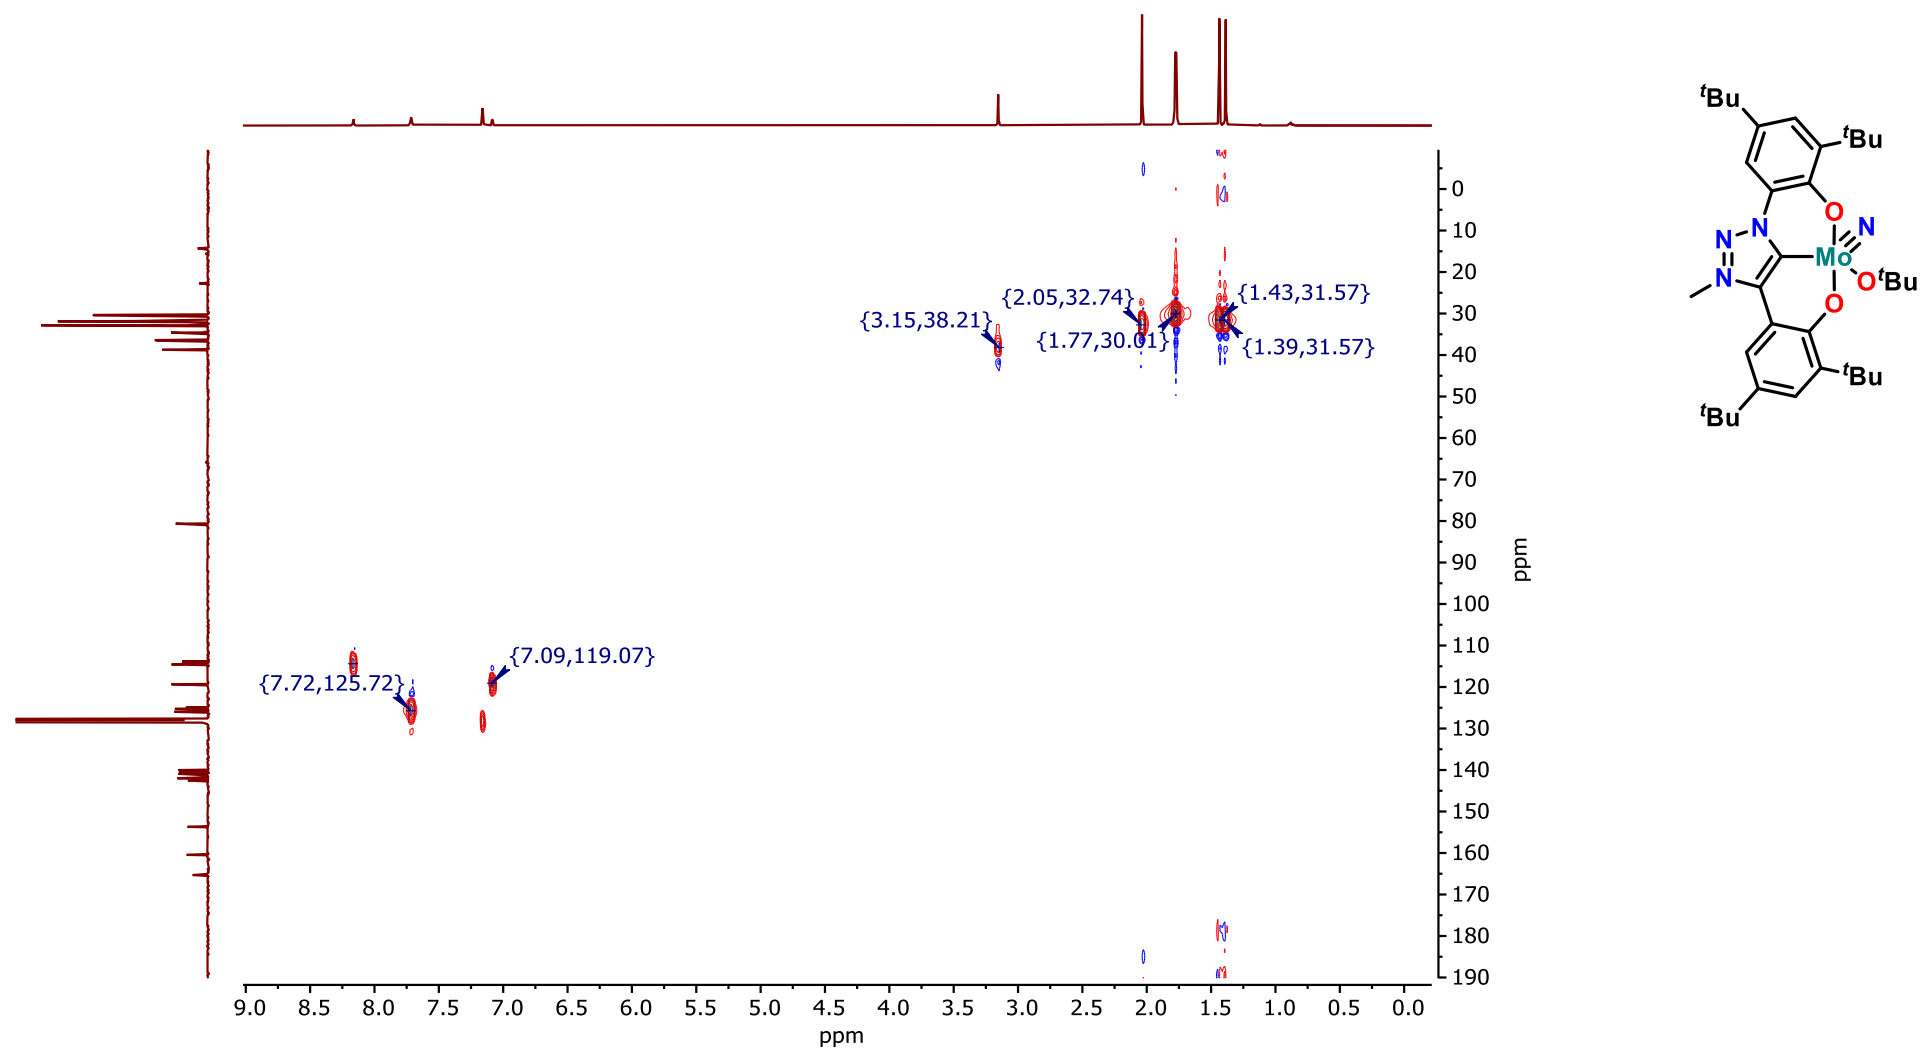

Figure S 22:  $^1\text{H} - ^{13}\text{C}$  HSQC of **1-O<sup>t</sup>Bu** in  $\text{C}_6\text{D}_6$  at 298 K.

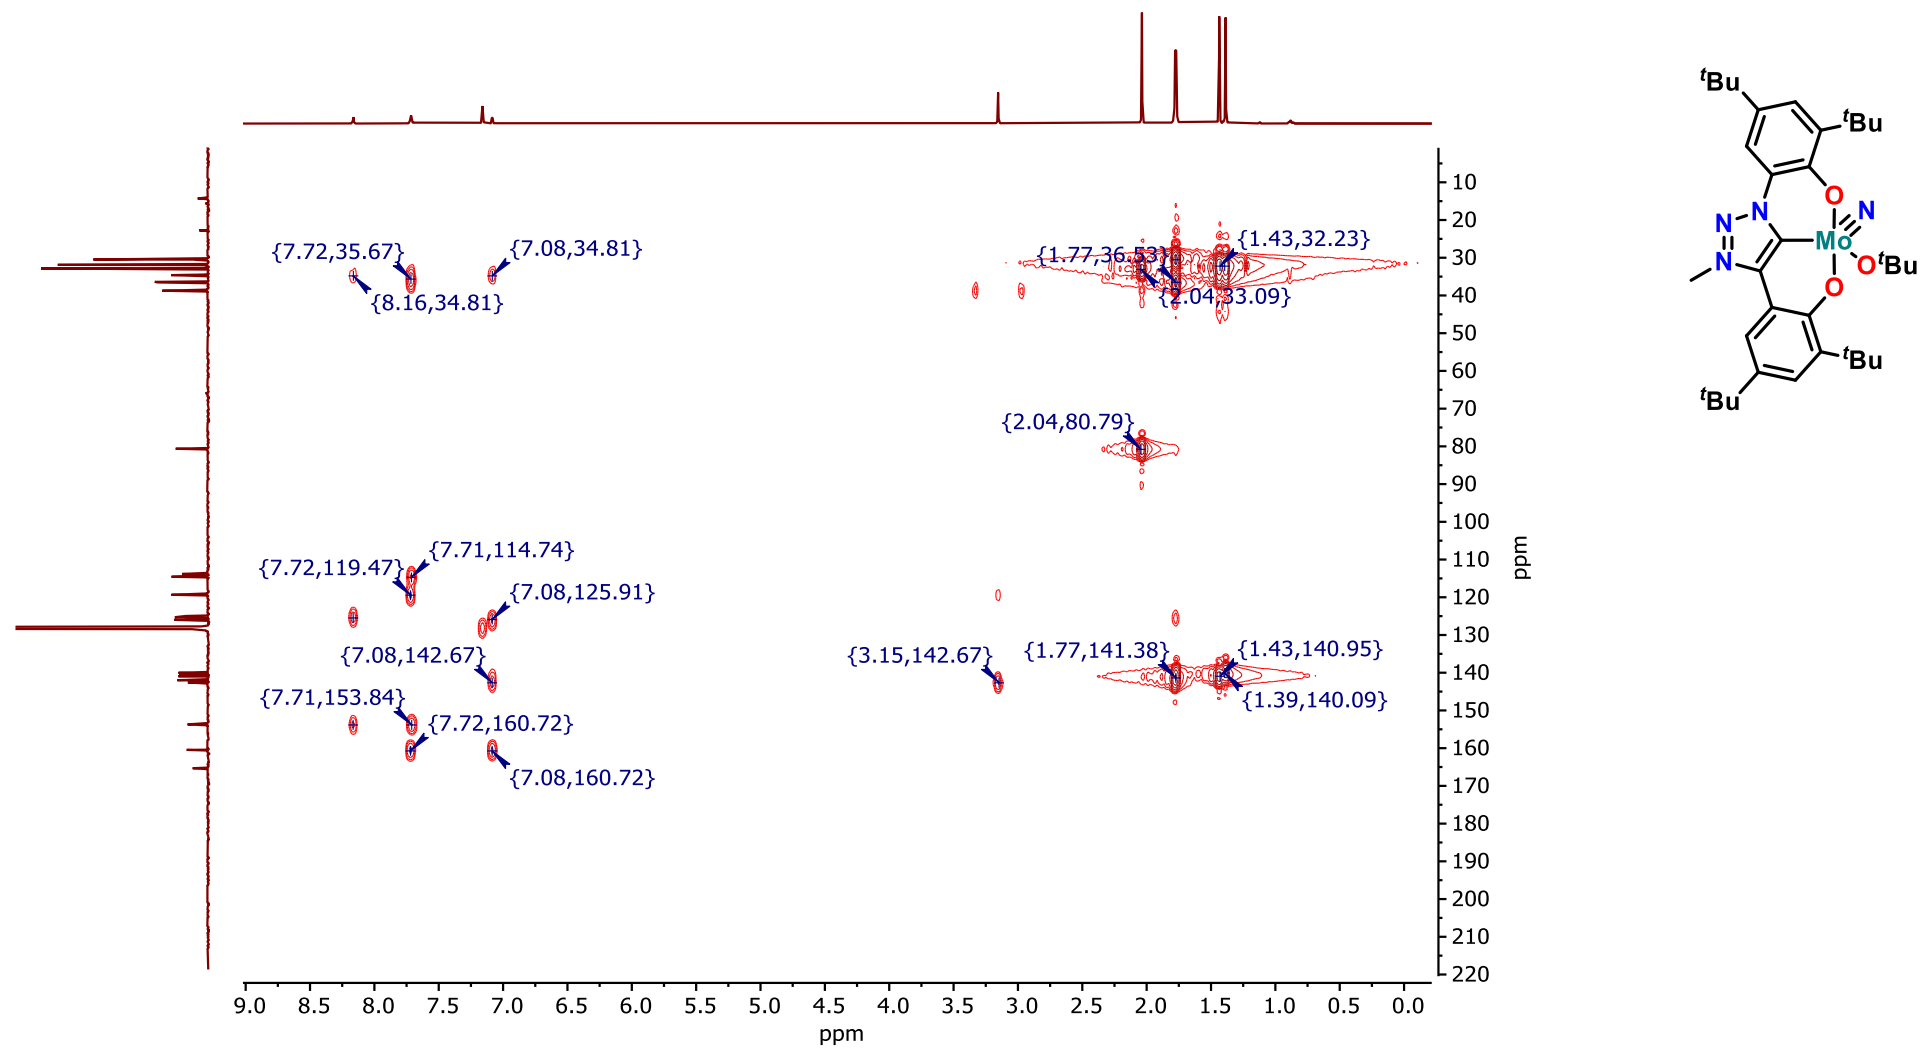

Figure S 23:  $^1\text{H} - ^{13}\text{C}$  HMBC of **1-O<sup>t</sup>Bu** in  $\text{C}_6\text{D}_6$  at 298 K.

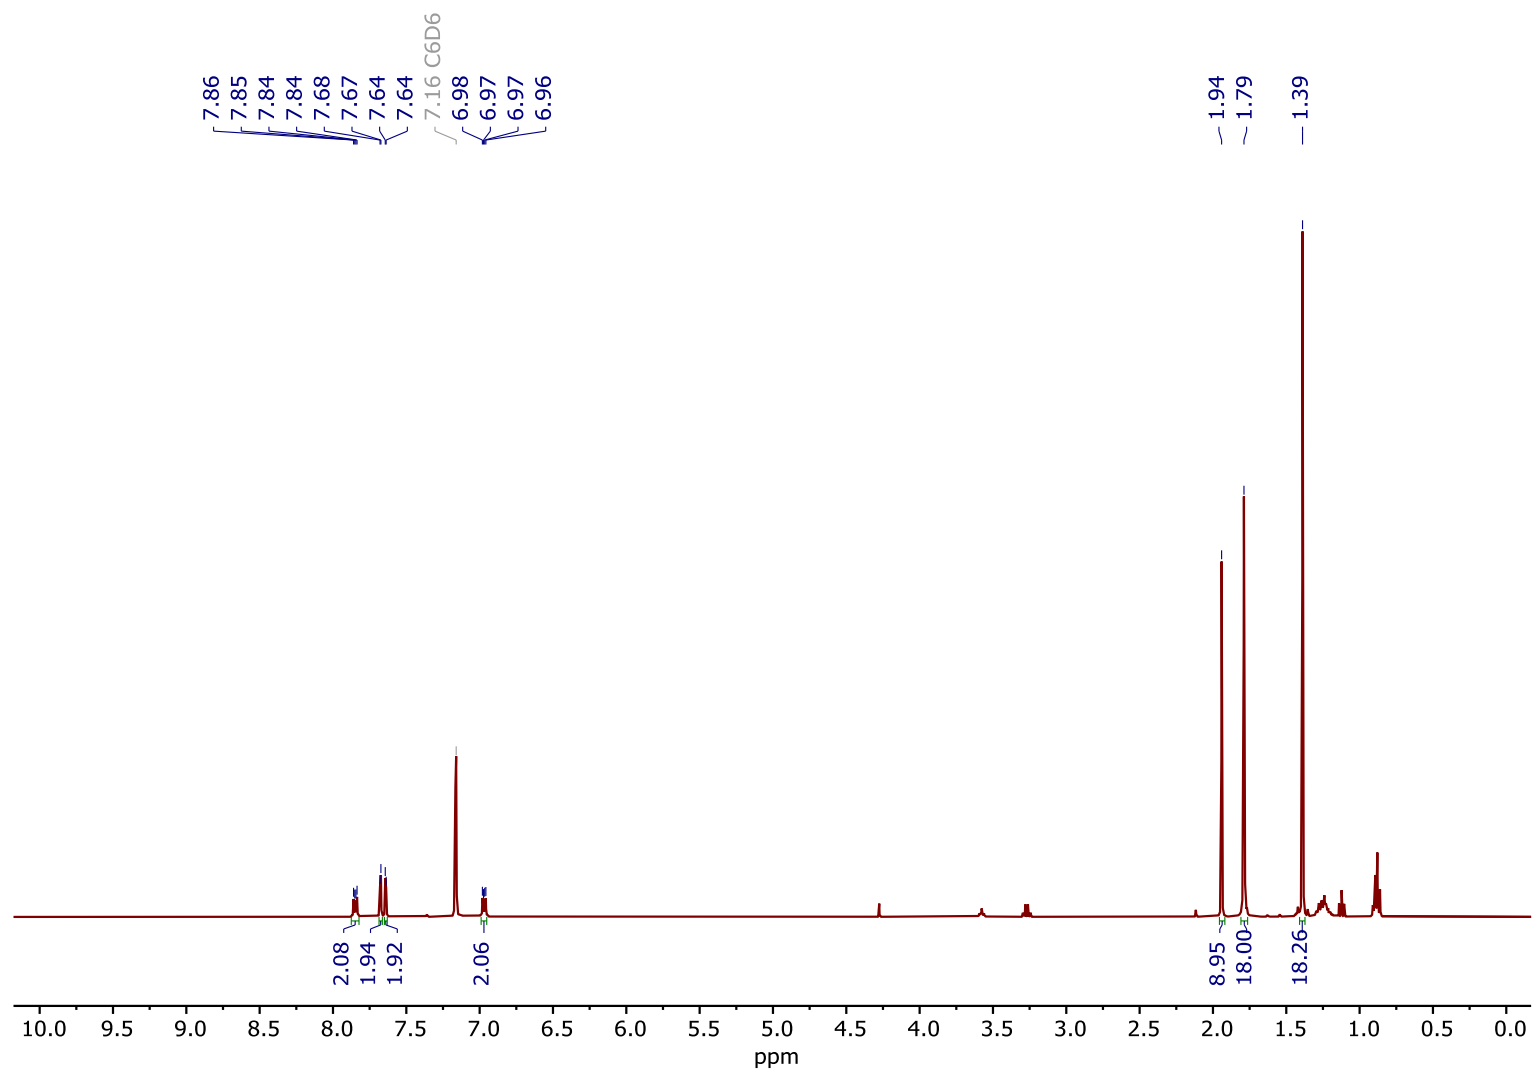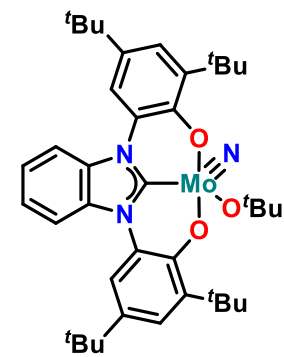

Figure S 24:  $^1\text{H}$  NMR of **2-O<sup>t</sup>Bu** in  $\text{C}_6\text{D}_6$  at 298 K.

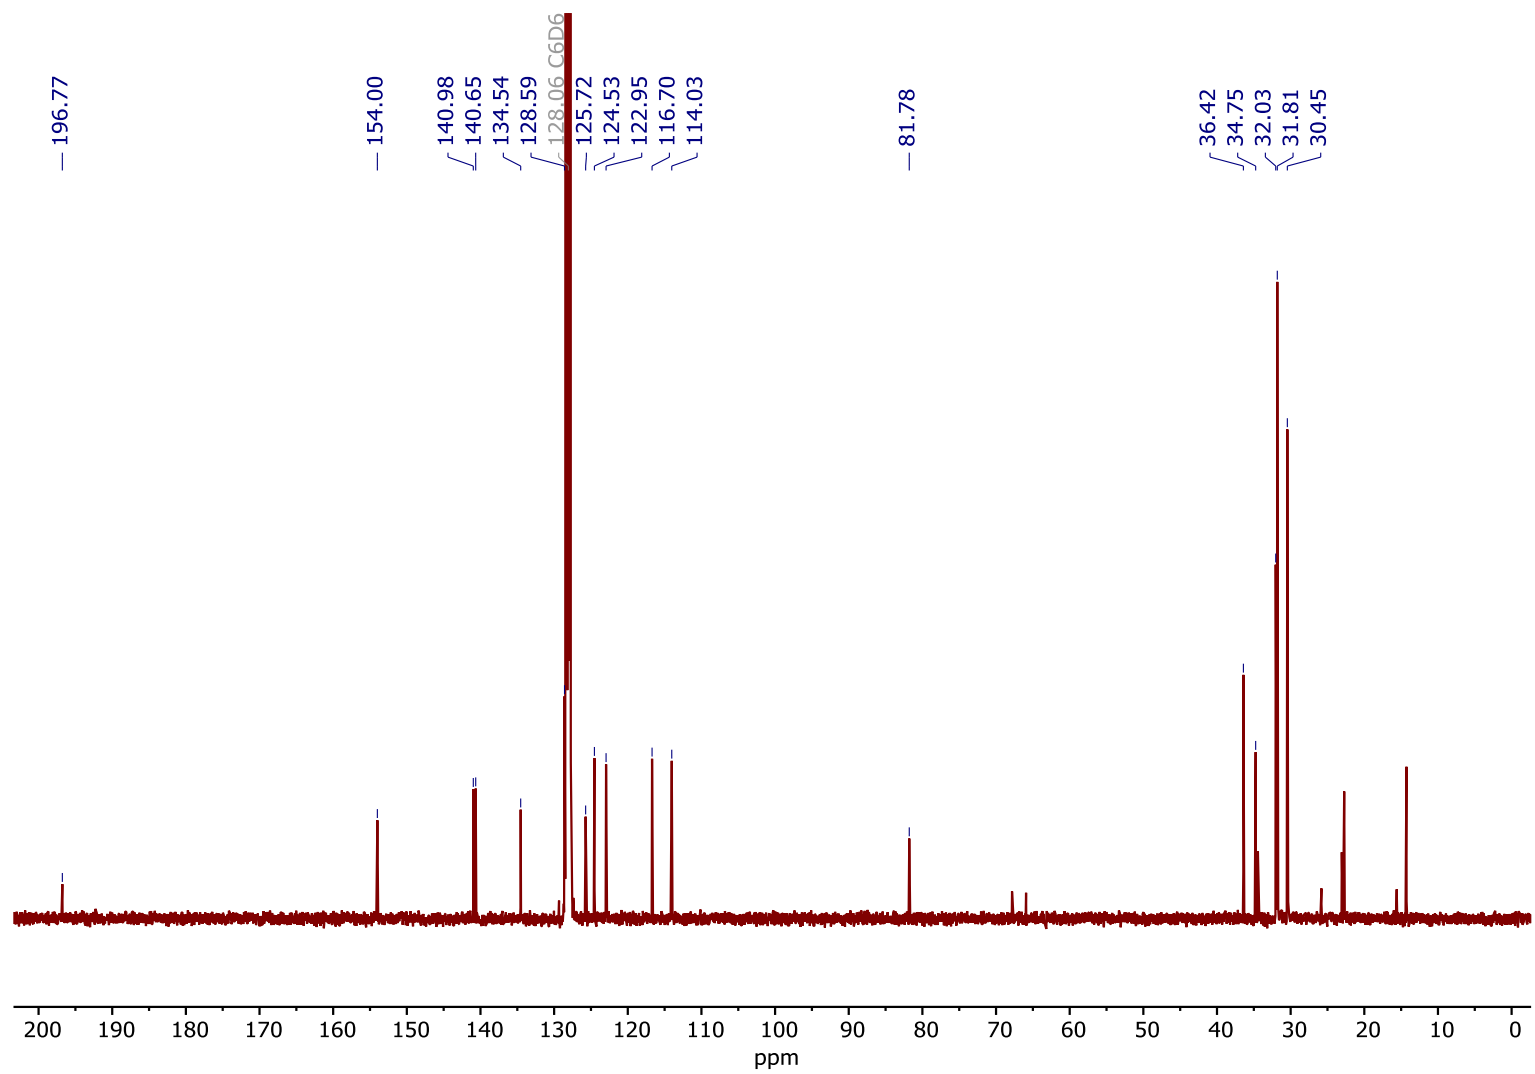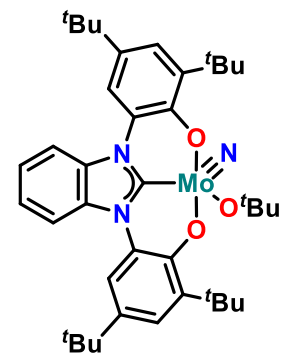

Figure S 25:  $^{13}\text{C}$  NMR of **2-O<sup>t</sup>Bu** in  $\text{C}_6\text{D}_6$  at 298 K.

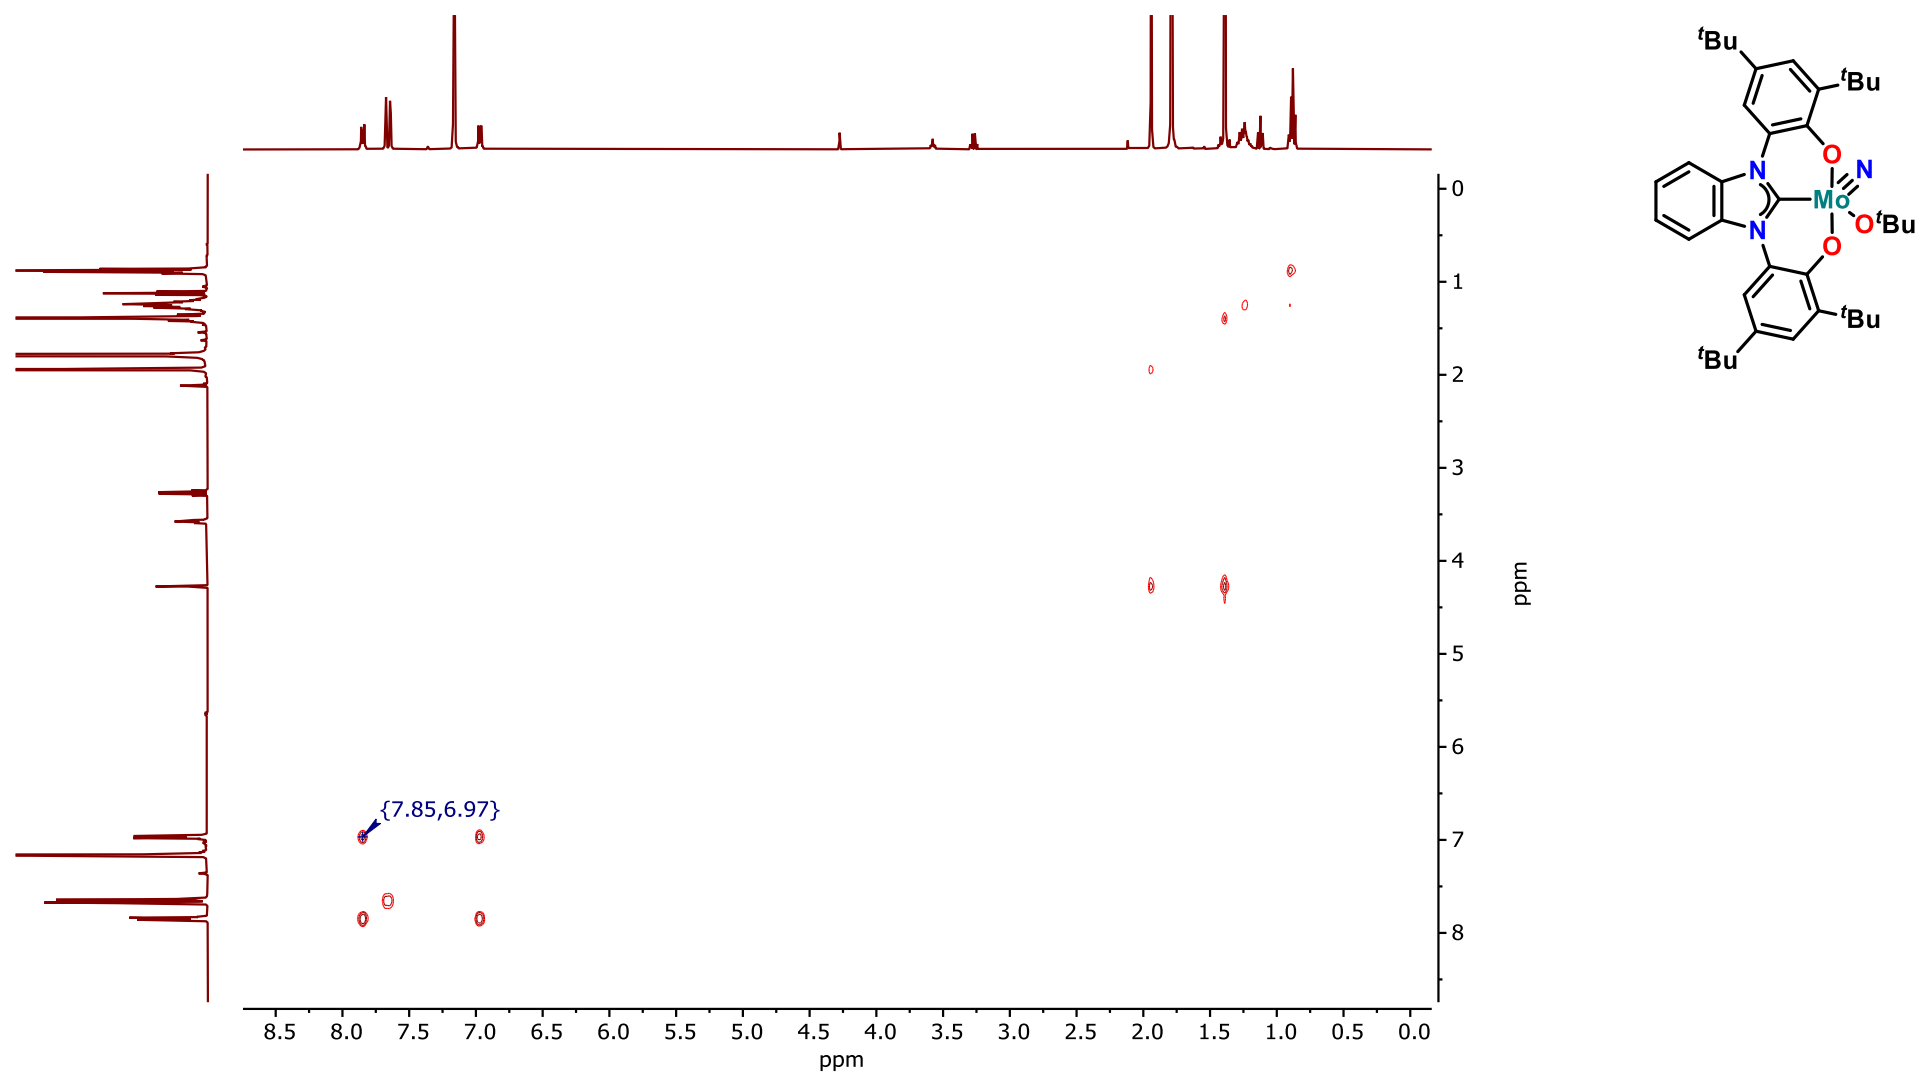

Figure S 26:  $^1\text{H}$  -  $^1\text{H}$  COSY of **2-O<sup>t</sup>Bu** in  $\text{C}_6\text{D}_6$  at 298 K.

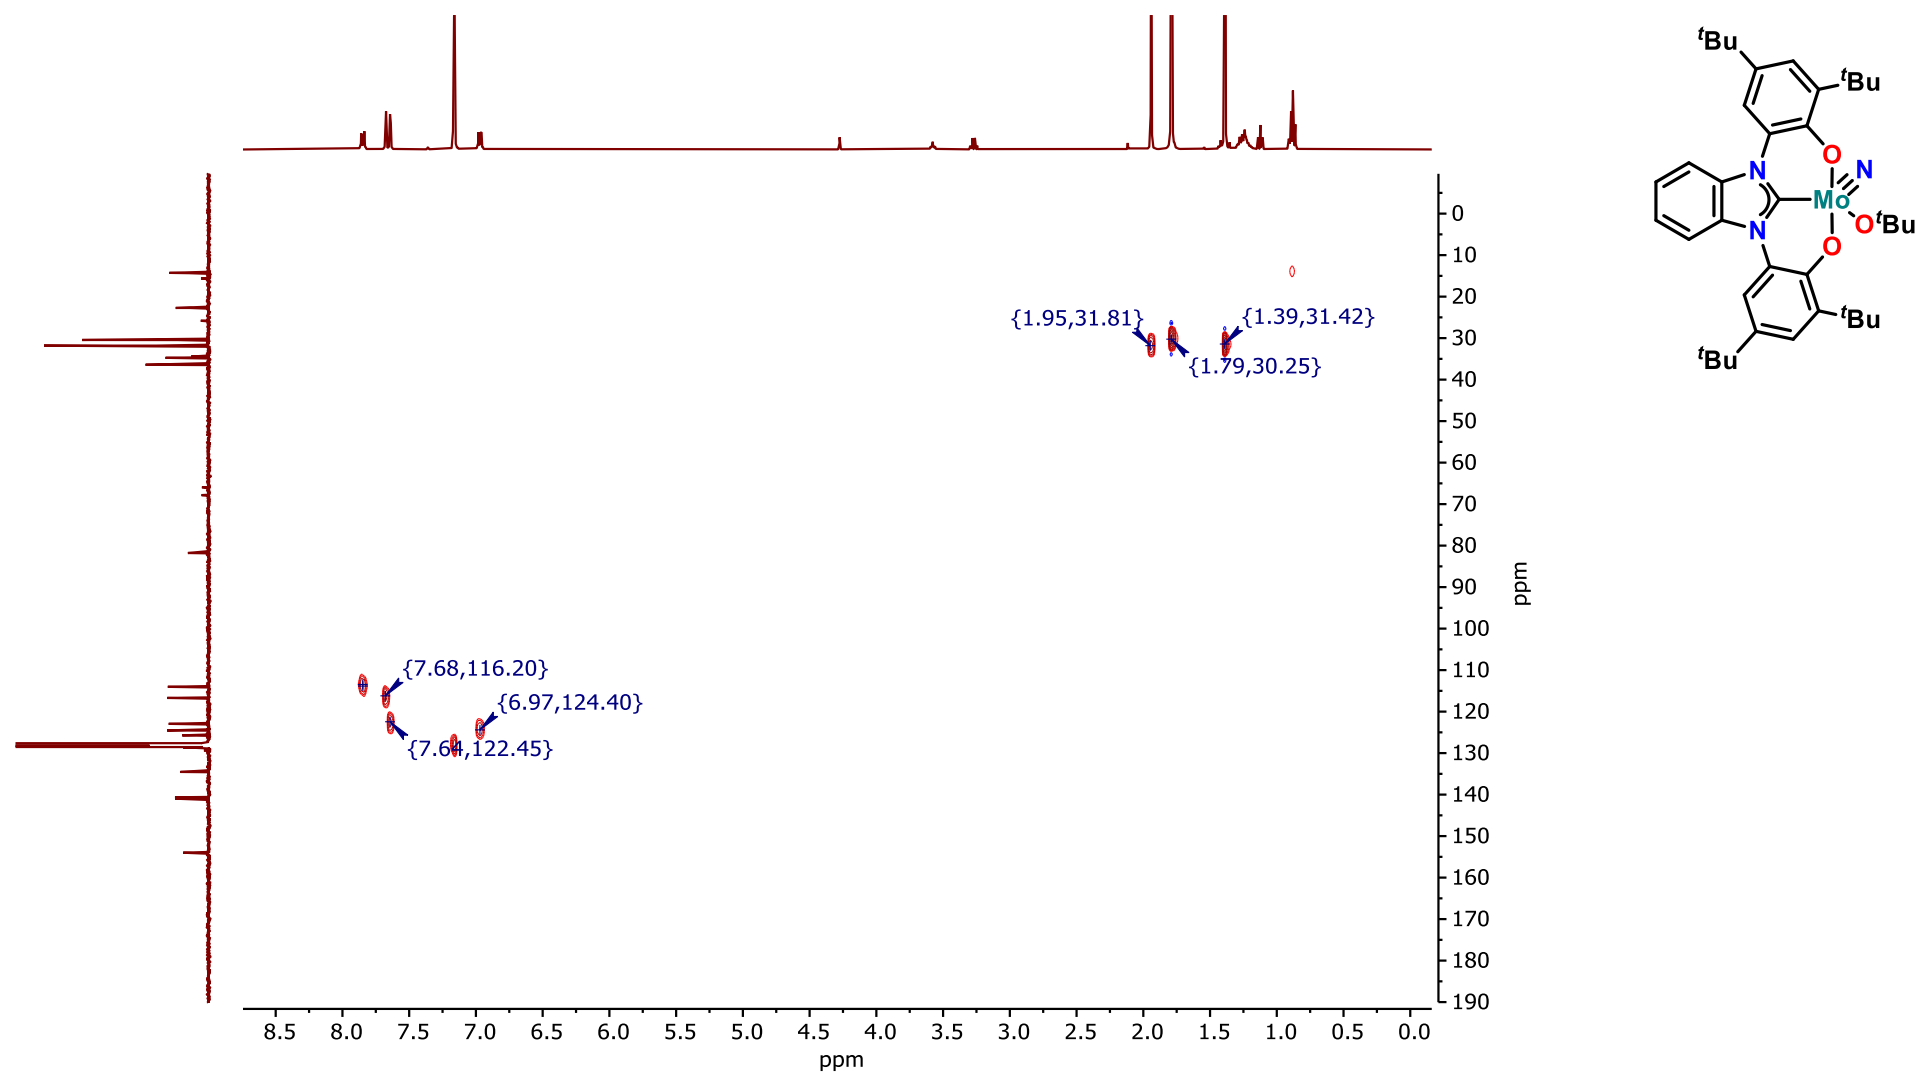

Figure S 27:  $^1\text{H}$  -  $^{13}\text{C}$  HSQC of **2-O<sup>t</sup>Bu** in  $\text{C}_6\text{D}_6$  at 298 K.



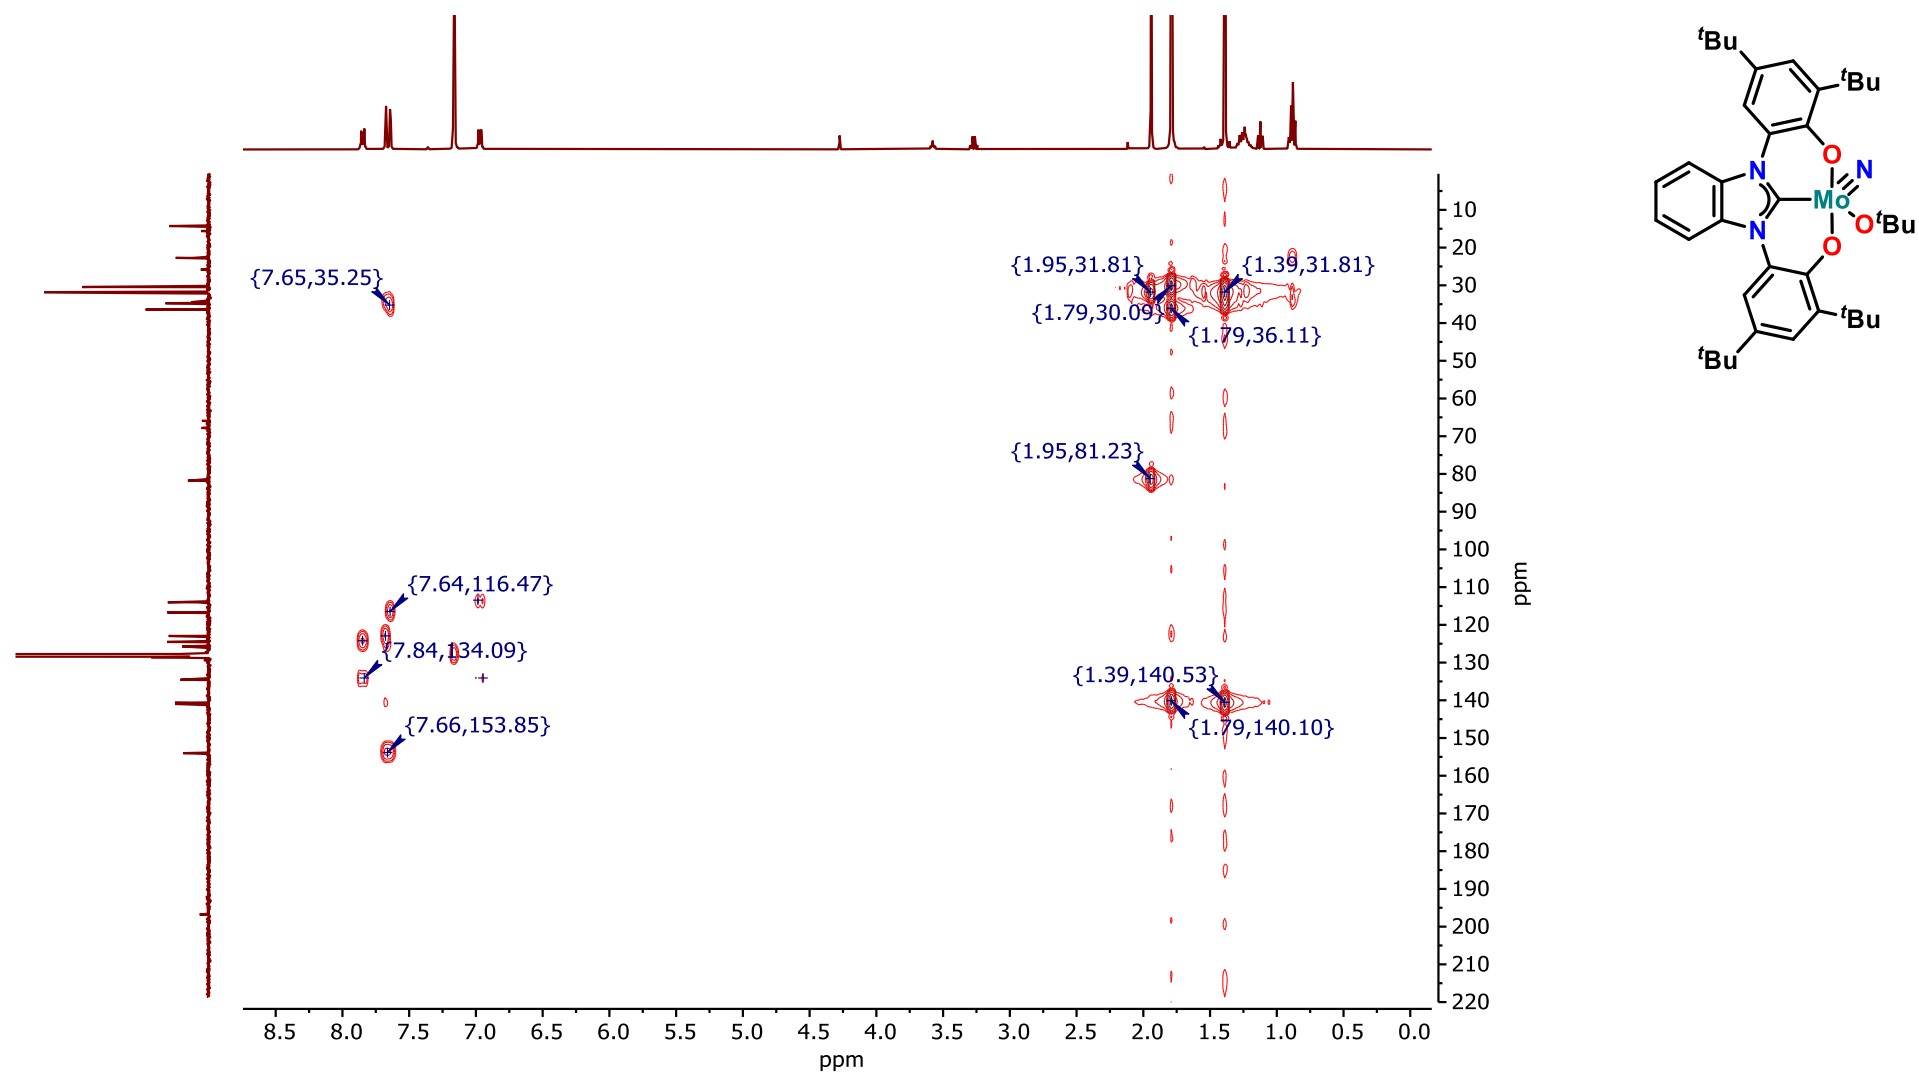

Figure S 28:  $^1\text{H} - ^{13}\text{C}$  HMBC of **2-O<sup>t</sup>Bu** in  $\text{C}_6\text{D}_6$  at 298 K.

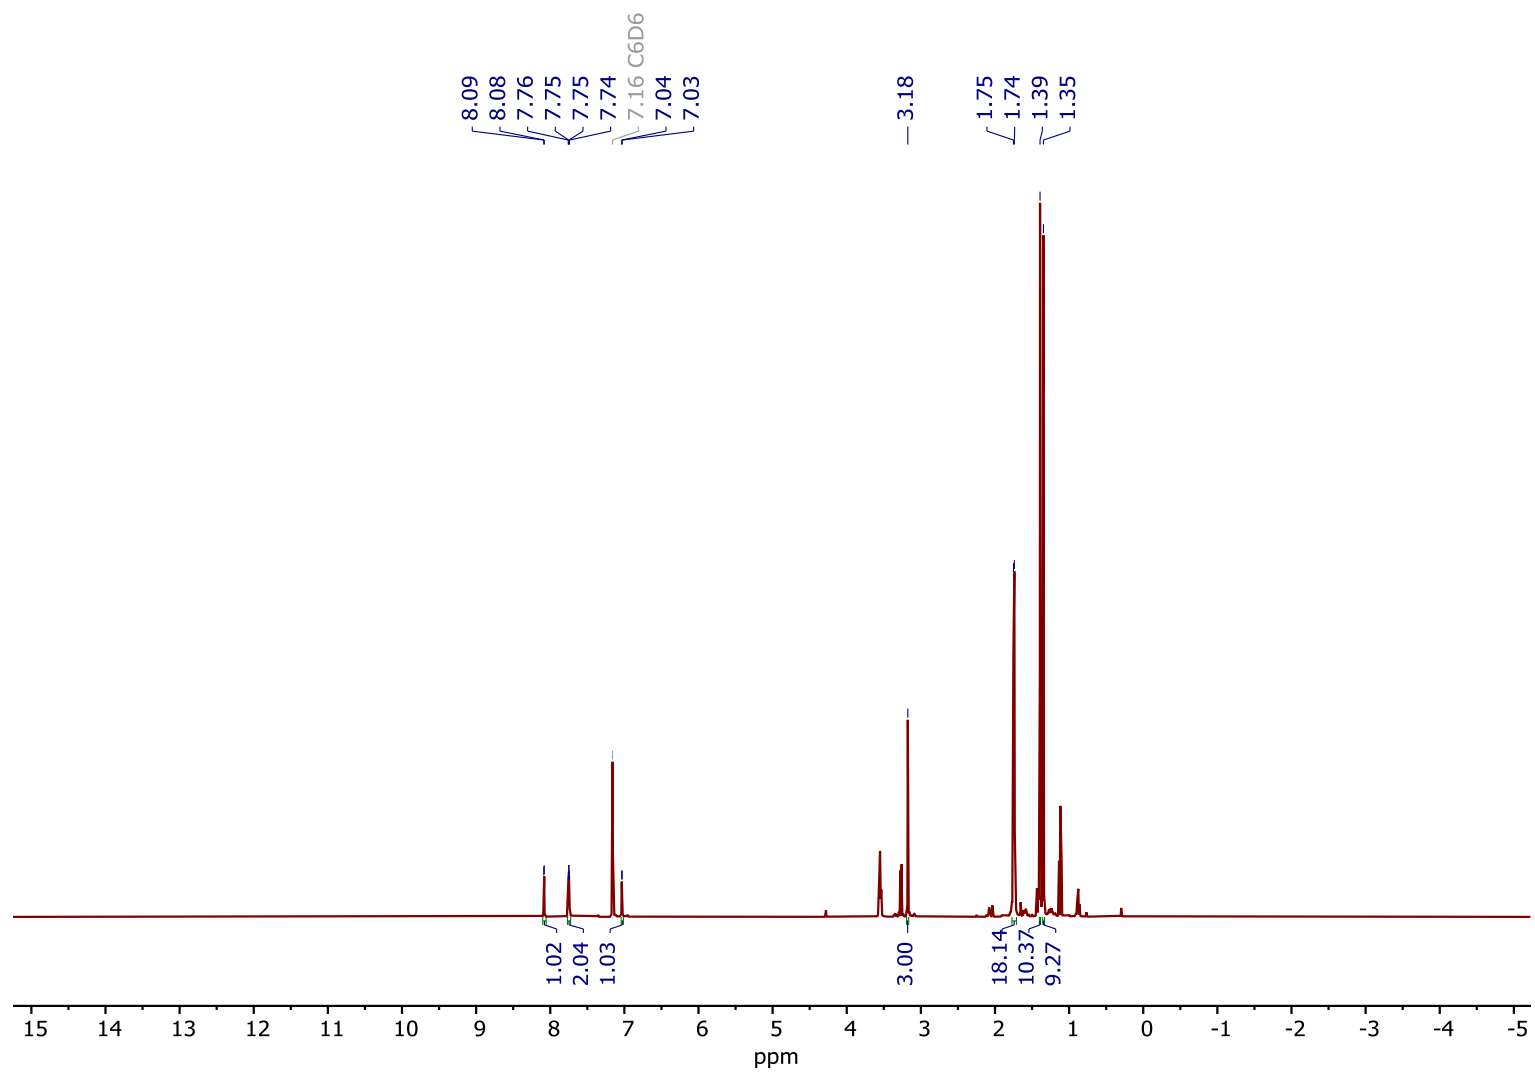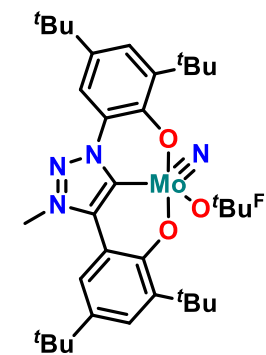

Figure S 29:  $^1\text{H}$  NMR of **1-O<sup>t</sup>BuF<sub>9</sub>** in  $\text{C}_6\text{D}_6$  at 298 K.

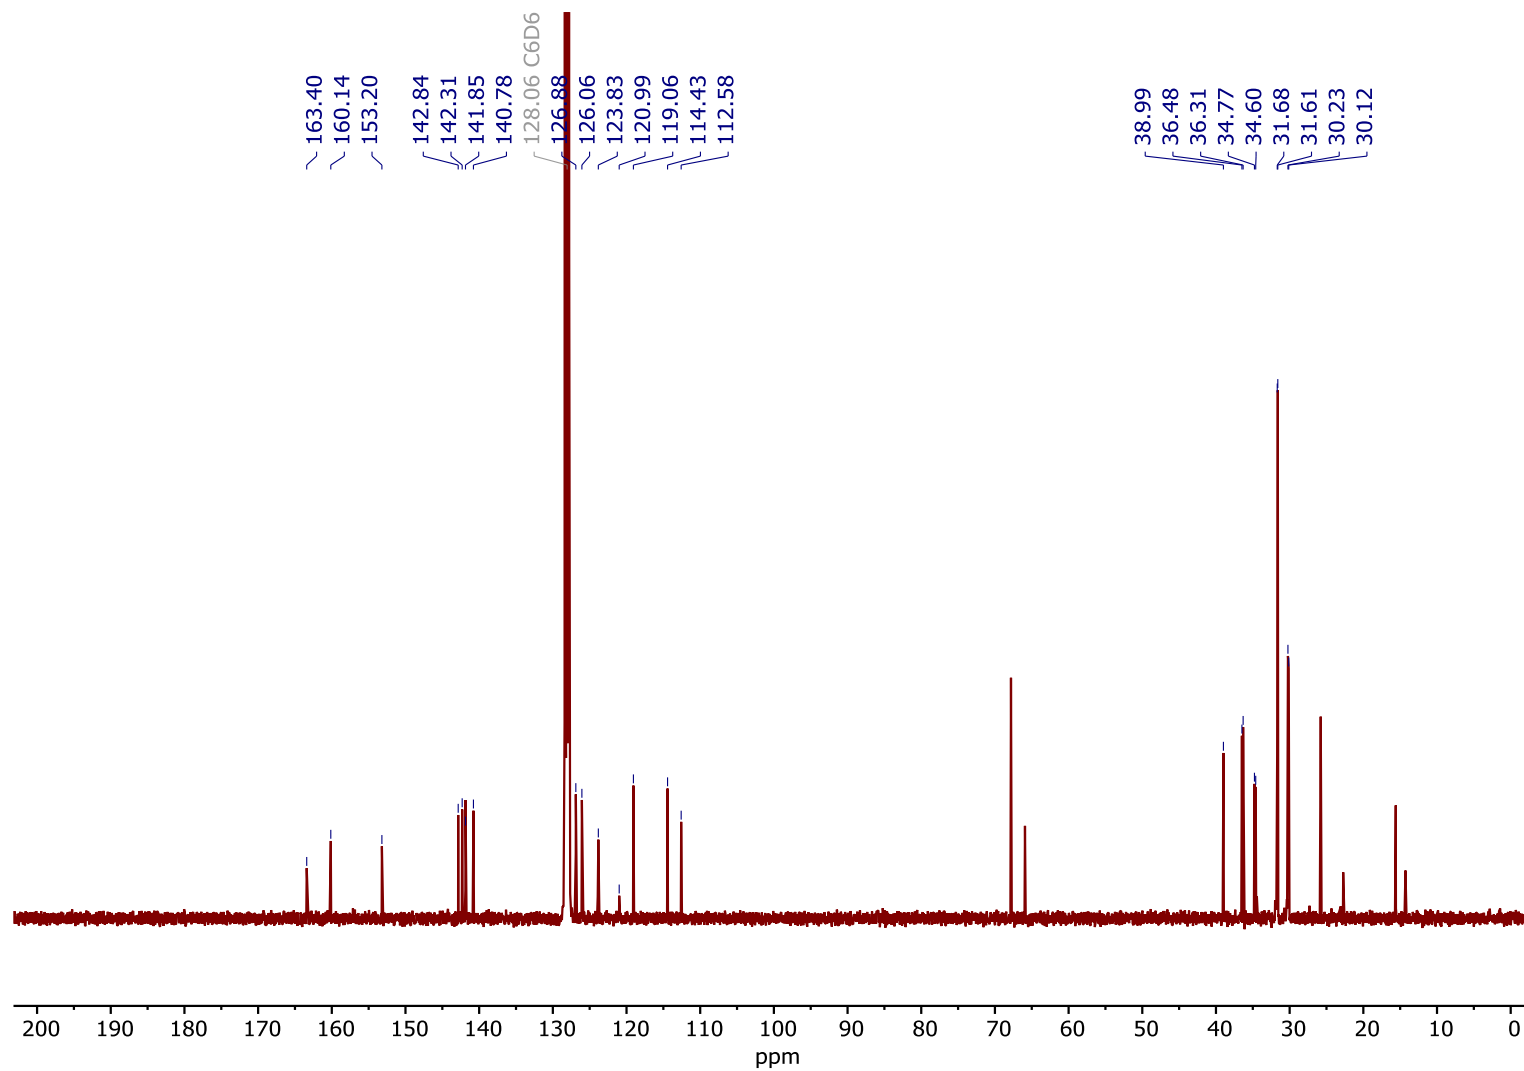

Figure S 30:  $^{13}\text{C}$  NMR of **1-O<sup>t</sup>Bu<sup>F</sup>9** in  $\text{C}_6\text{D}_6$  at 298 K.



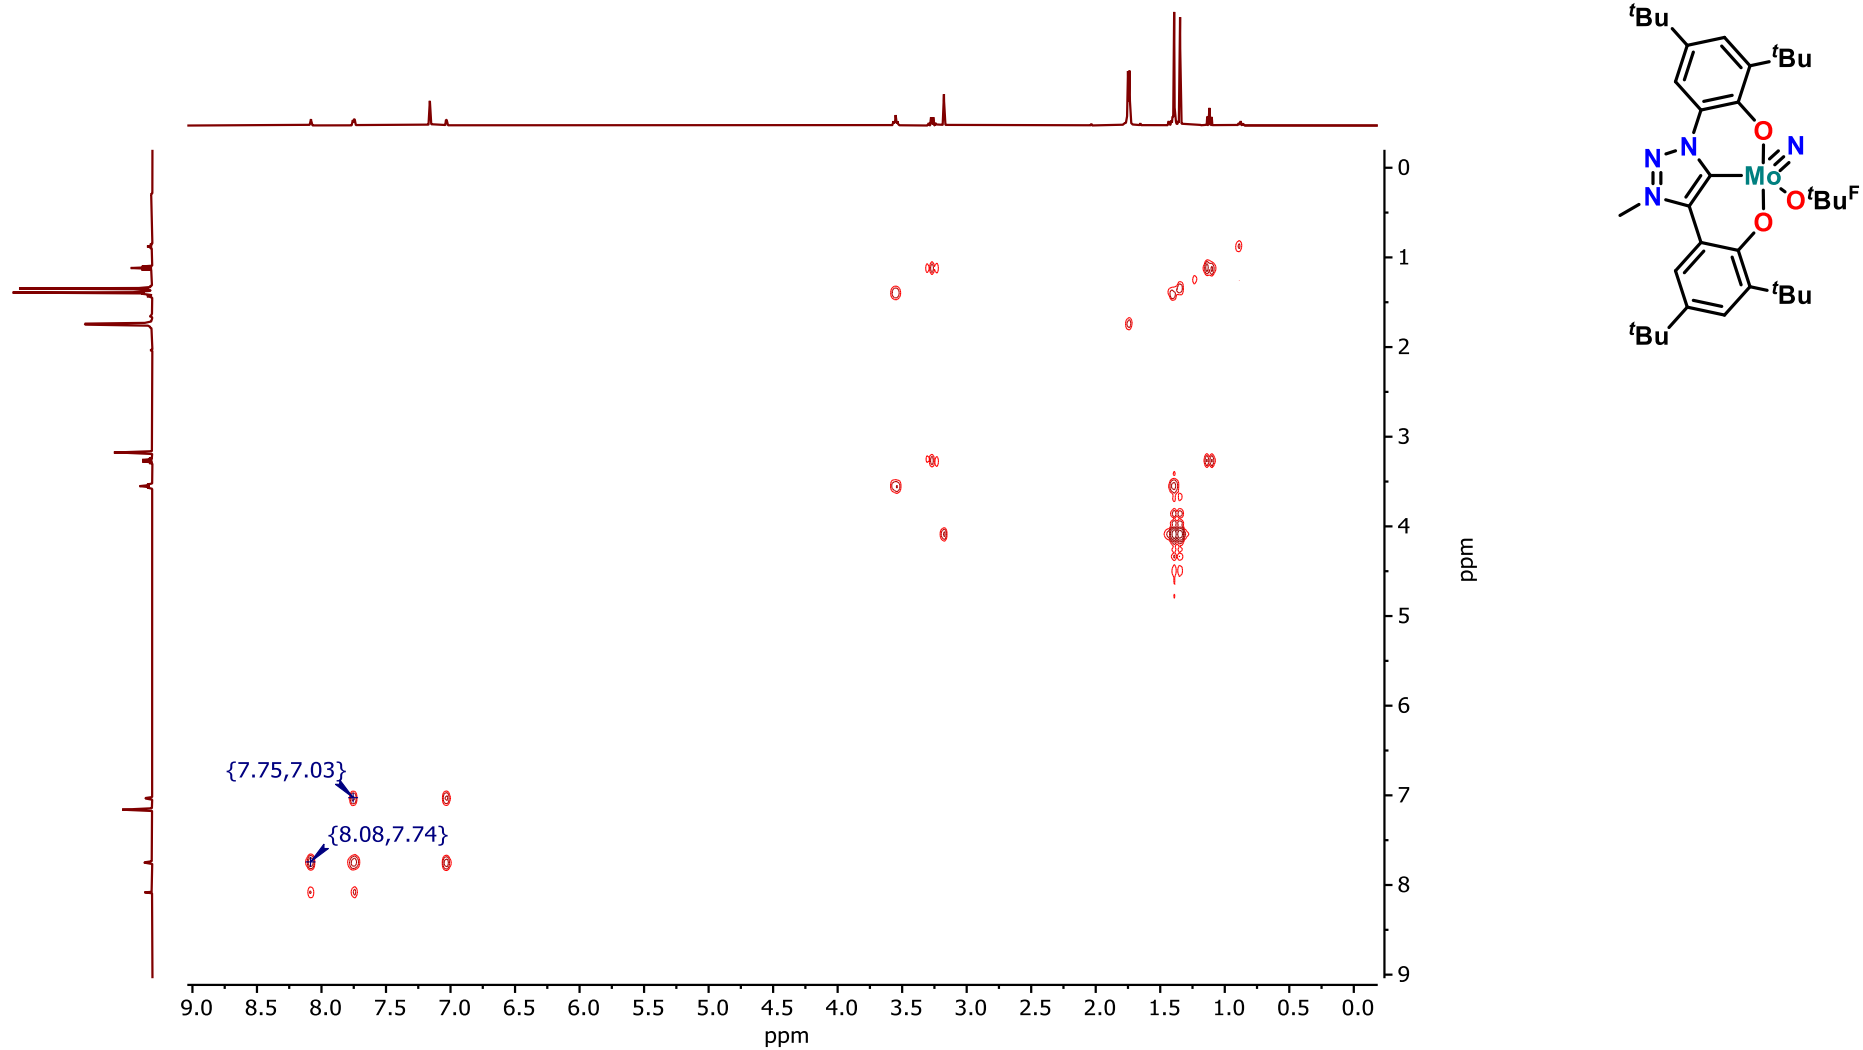

Figure S 32:  $^1\text{H} - ^1\text{H}$  COSY of  $1\text{-O}^t\text{BuF}_9$  in  $\text{C}_6\text{D}_6$  at 298 K.

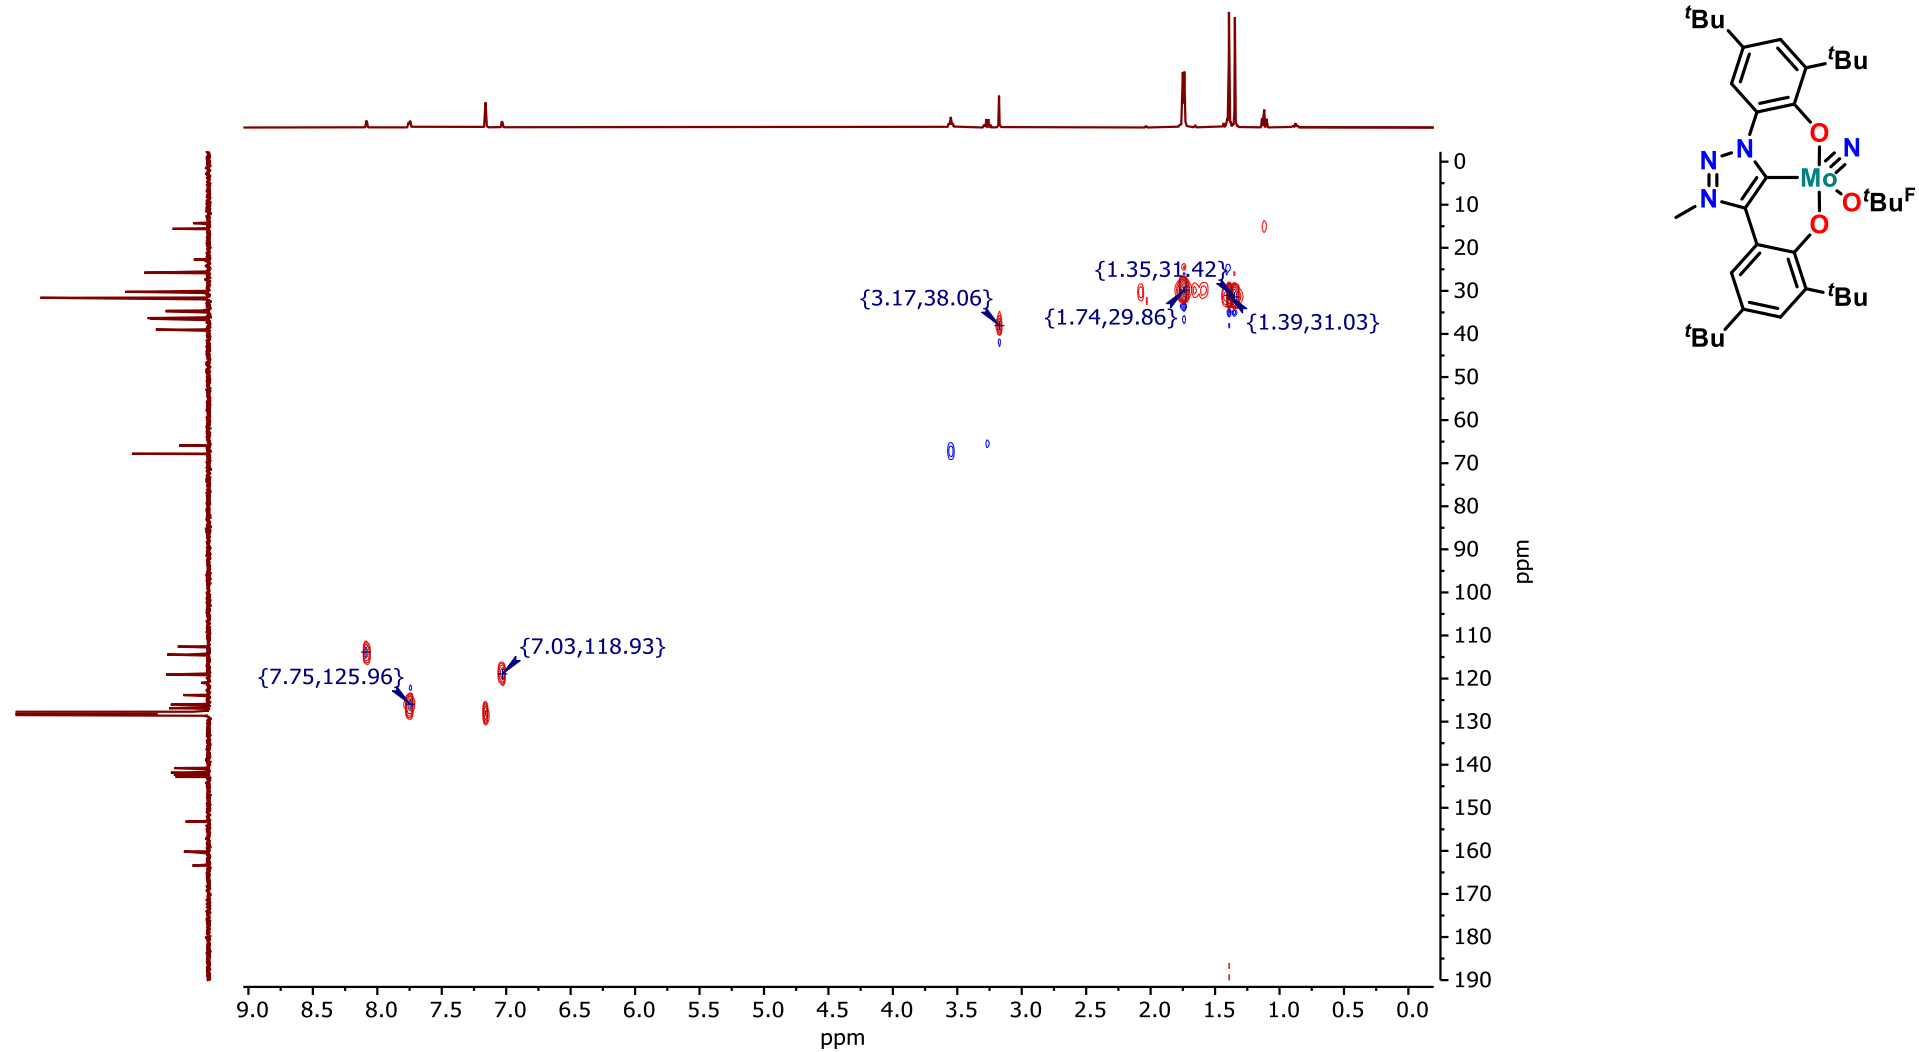

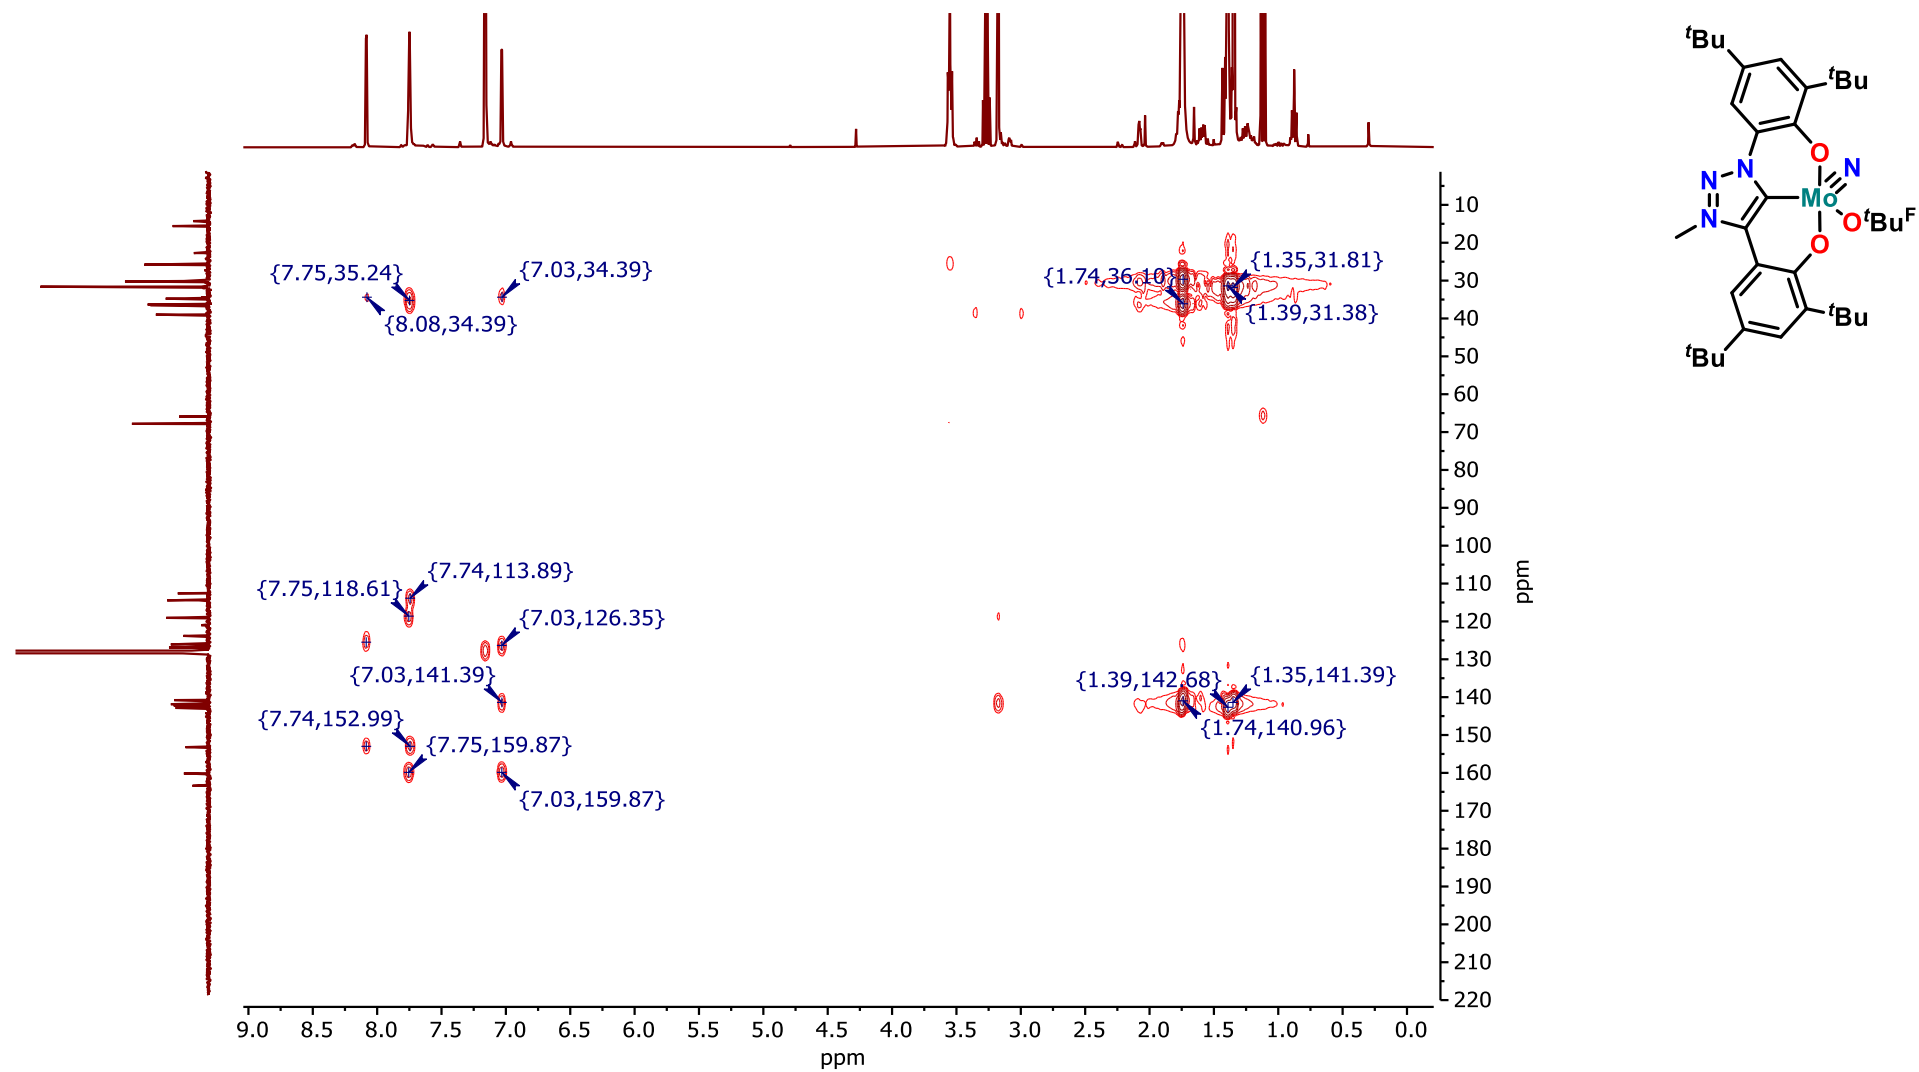

Figure S 34:  $^1\text{H} - ^{13}\text{C}$  HMBC of **1-O<sup>t</sup>Bu<sup>F</sup>9** in  $\text{C}_6\text{D}_6$  at 298 K.

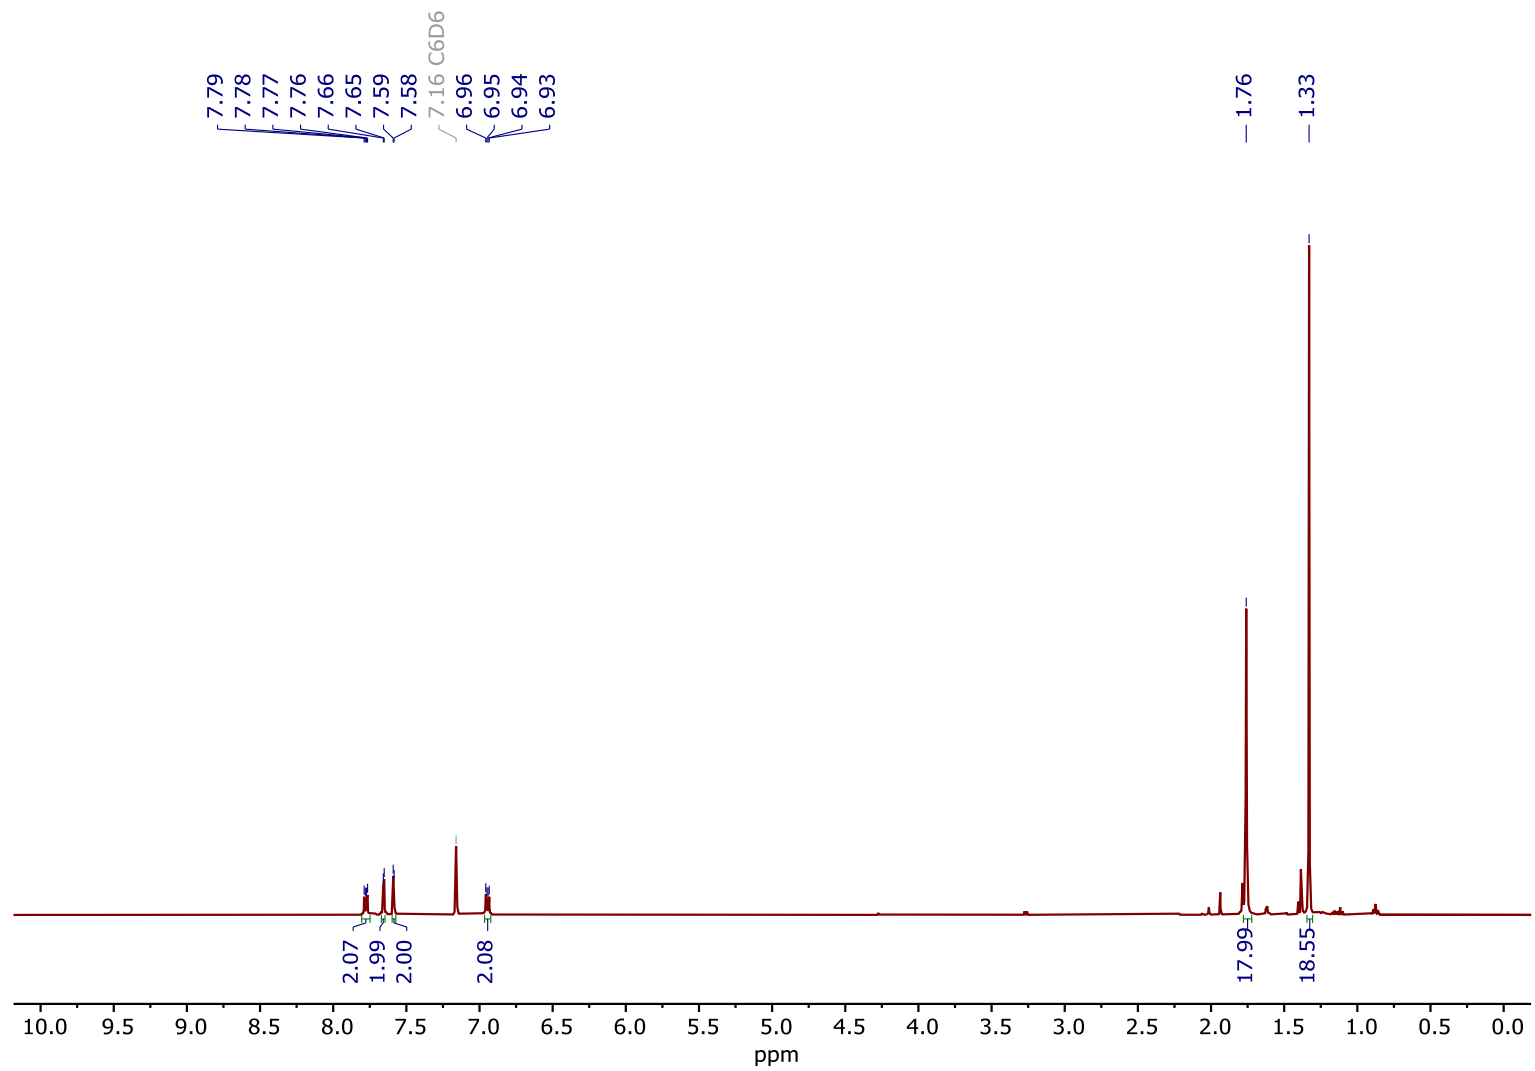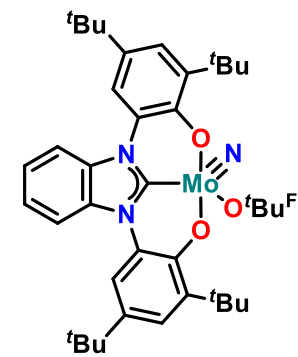

Figure S 35:  $^1\text{H}$  NMR of  $2\text{-O}^t\text{BuF}_9$  in  $\text{C}_6\text{D}_6$  at 298 K.



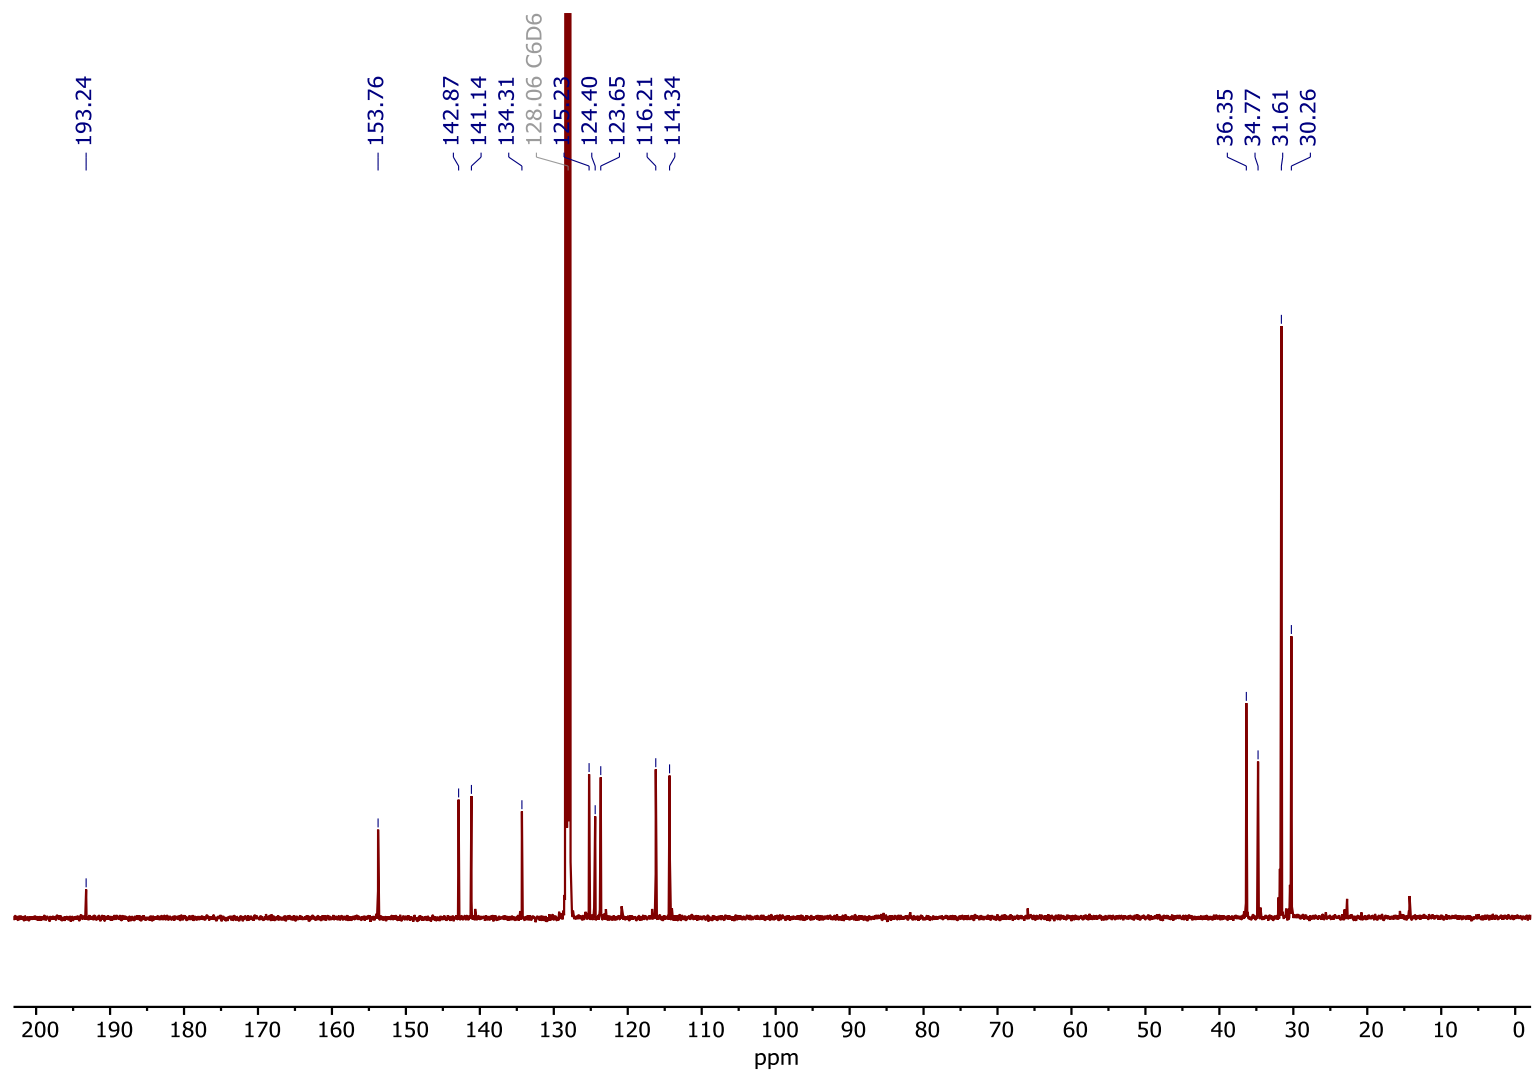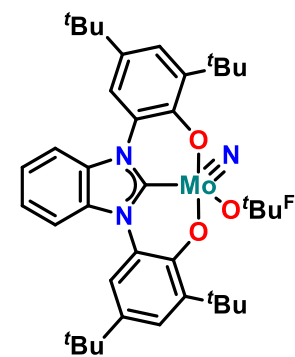

Figure S 36:  $^{13}\text{C}$  NMR of **2-O<sup>t</sup>BuF<sup>9</sup>** in  $\text{C}_6\text{D}_6$  at 298 K.

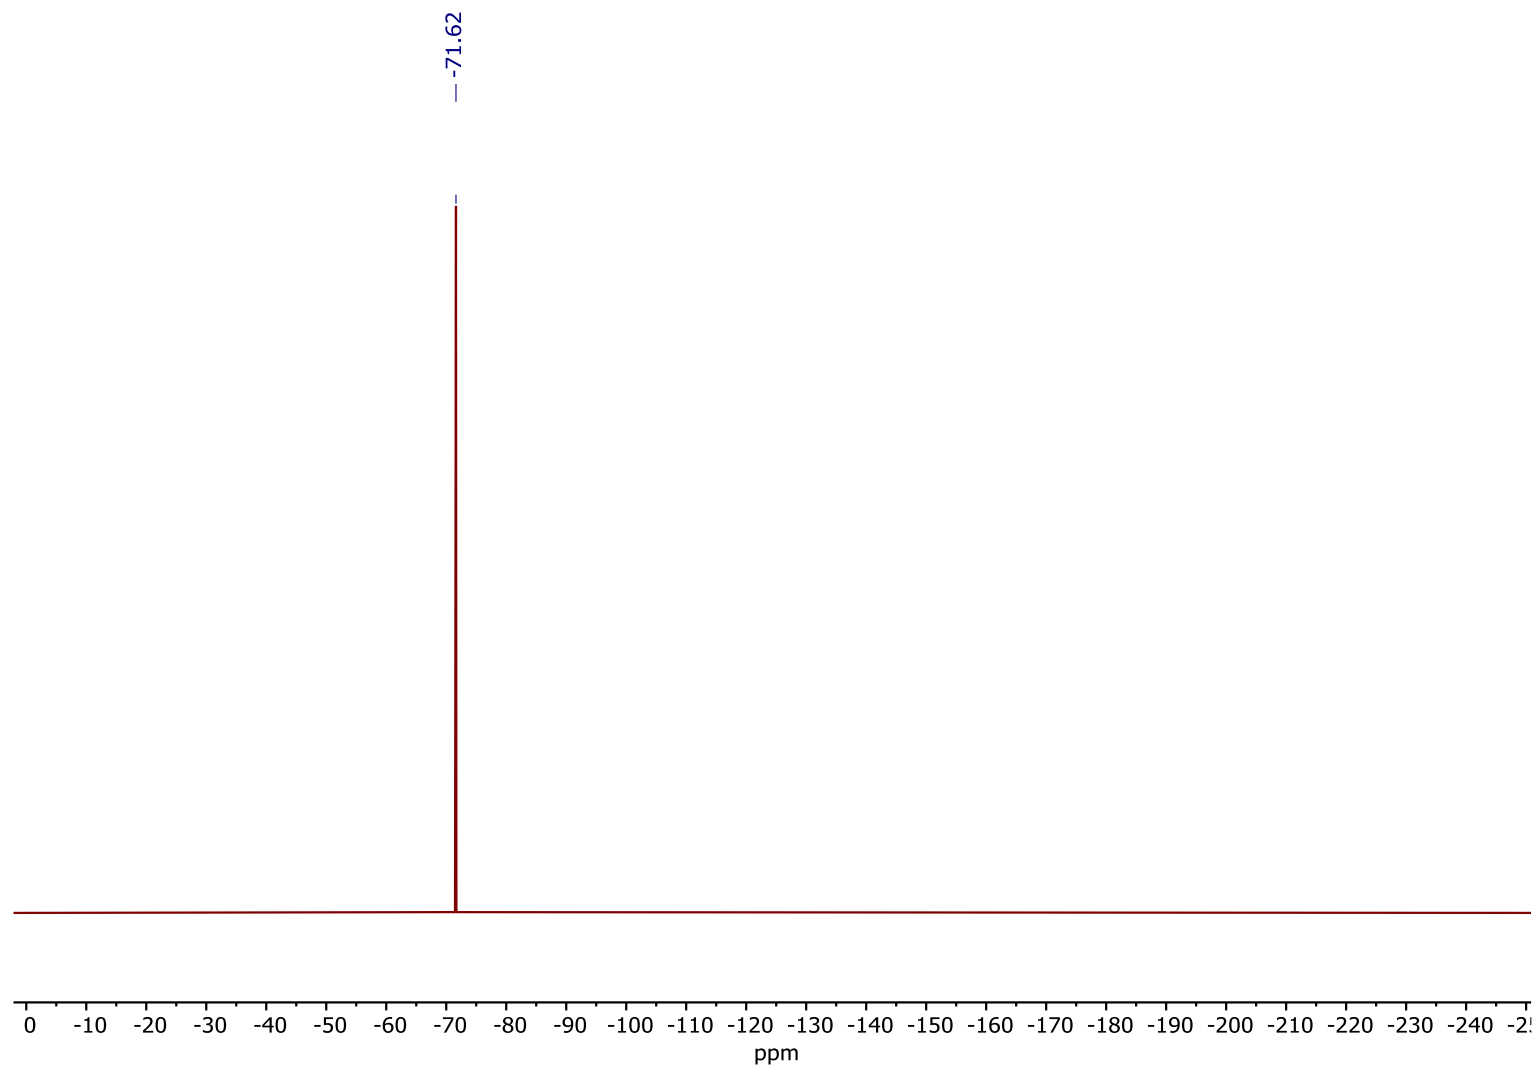

Figure S 37:  $^{19}\text{F}$  NMR of **2-O<sup>t</sup>BuF<sup>9</sup>** in  $\text{C}_6\text{D}_6$  at 298 K.

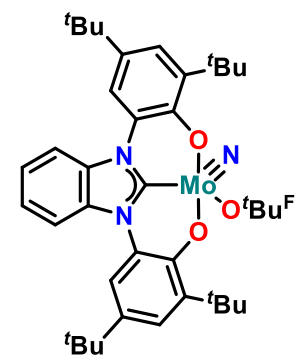

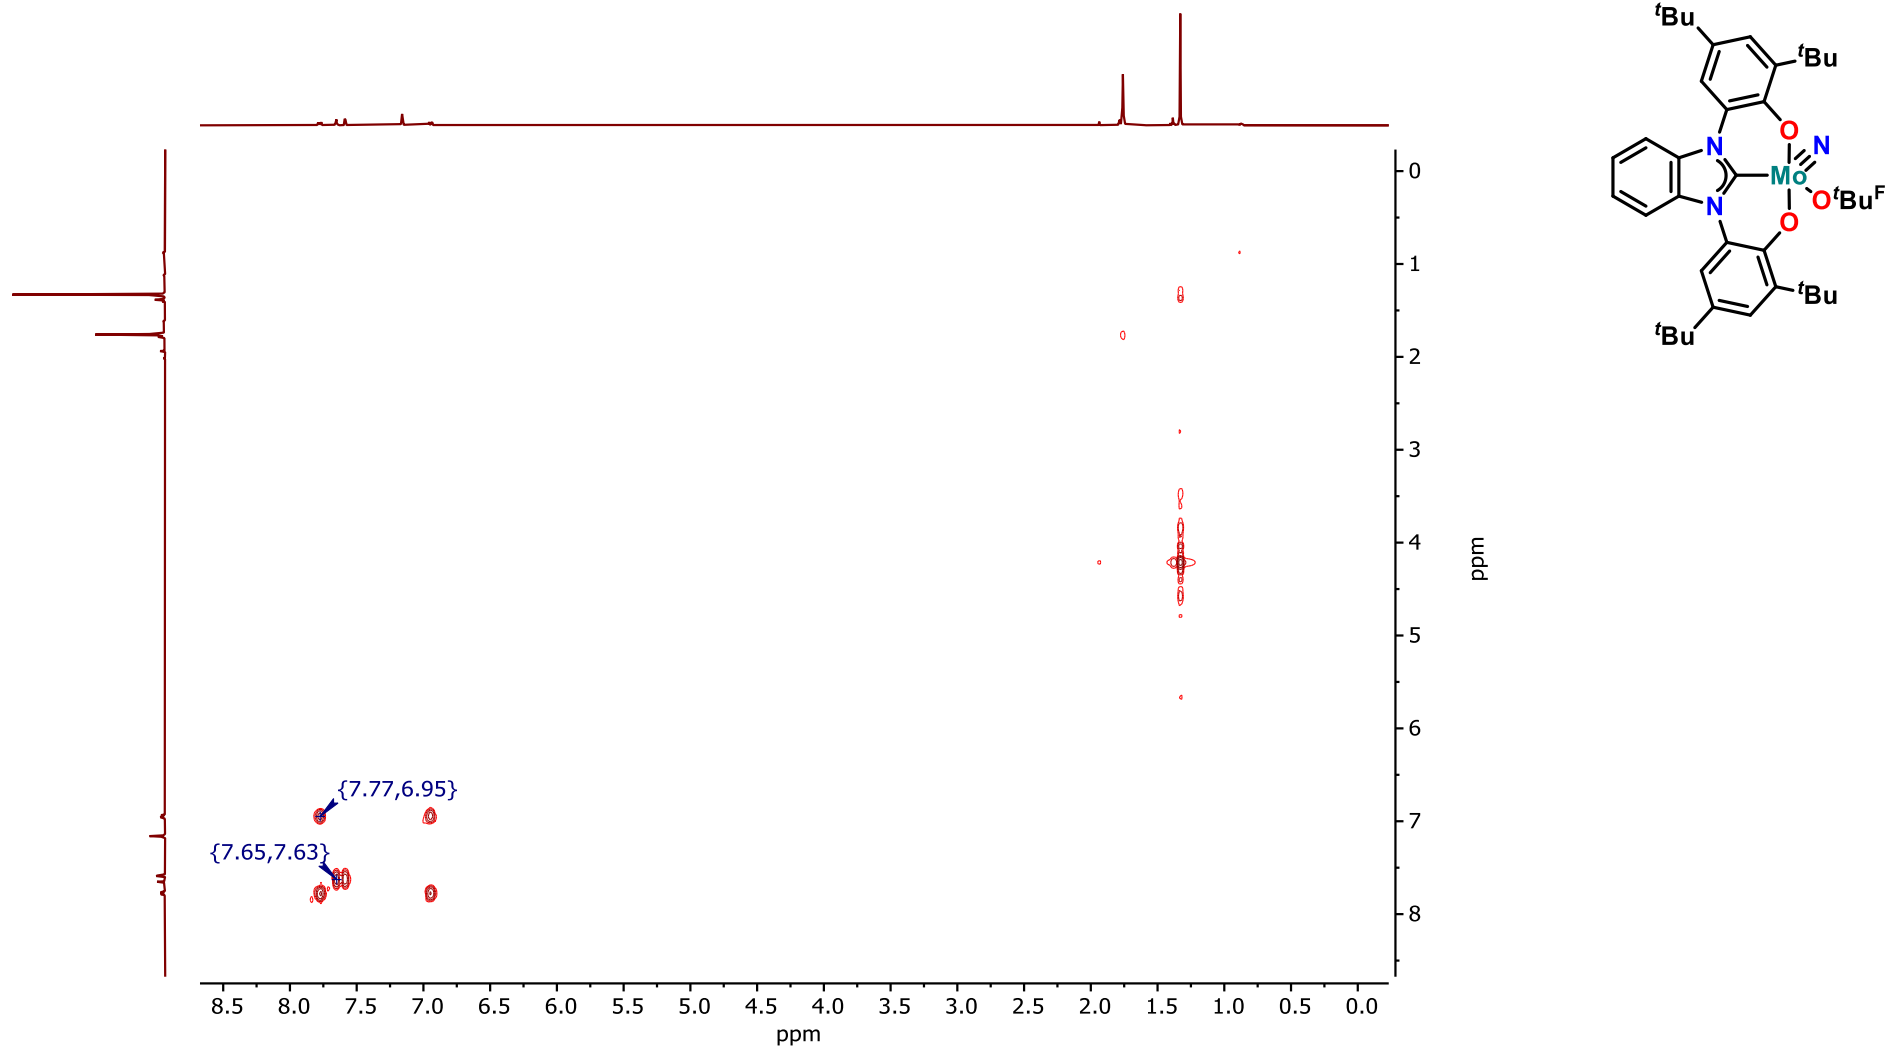

Figure S 38:  $^1\text{H} - ^1\text{H}$  COSY of **2-O<sup>t</sup>BuF<sup>9</sup>** in  $\text{C}_6\text{D}_6$  at 298 K.

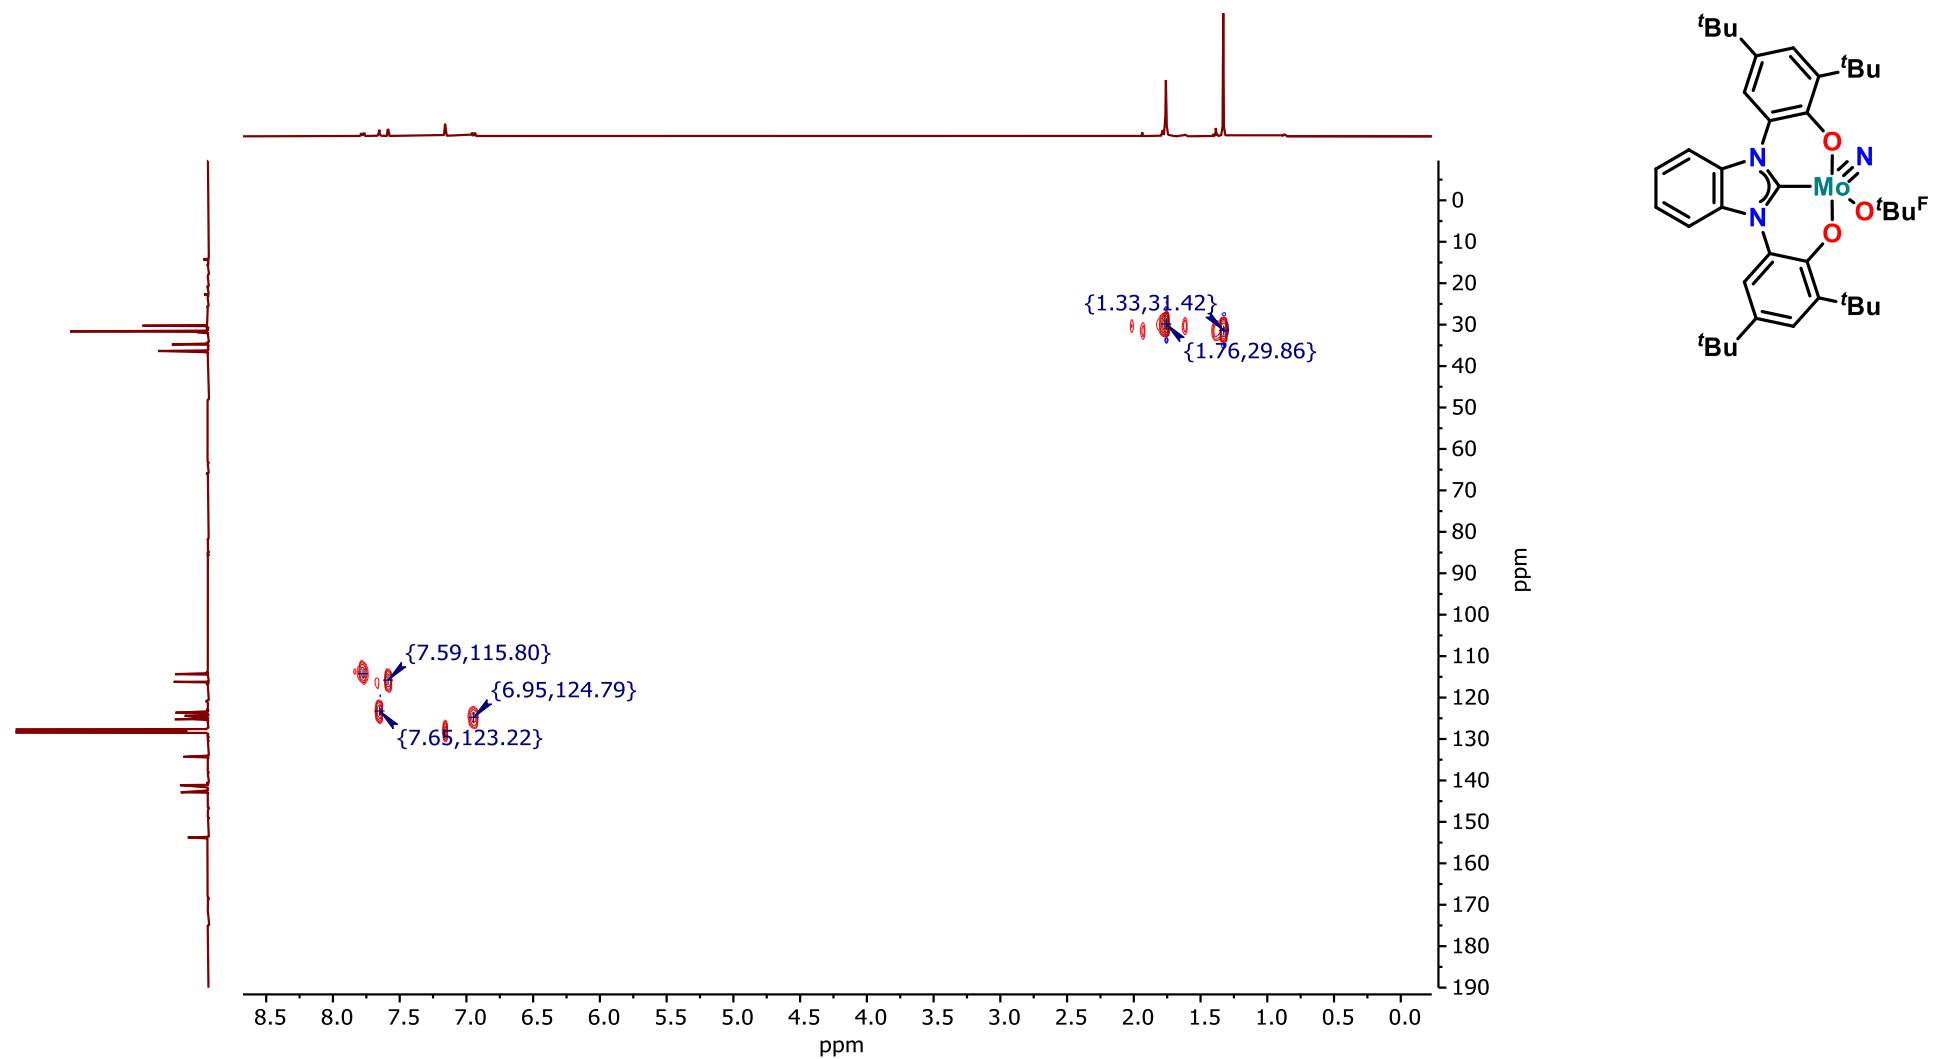

Figure S 39:  $^1\text{H}$  -  $^{13}\text{C}$  HSQC of **2-O<sup>t</sup>BuF<sup>9</sup>** in  $\text{C}_6\text{D}_6$  at 298 K.

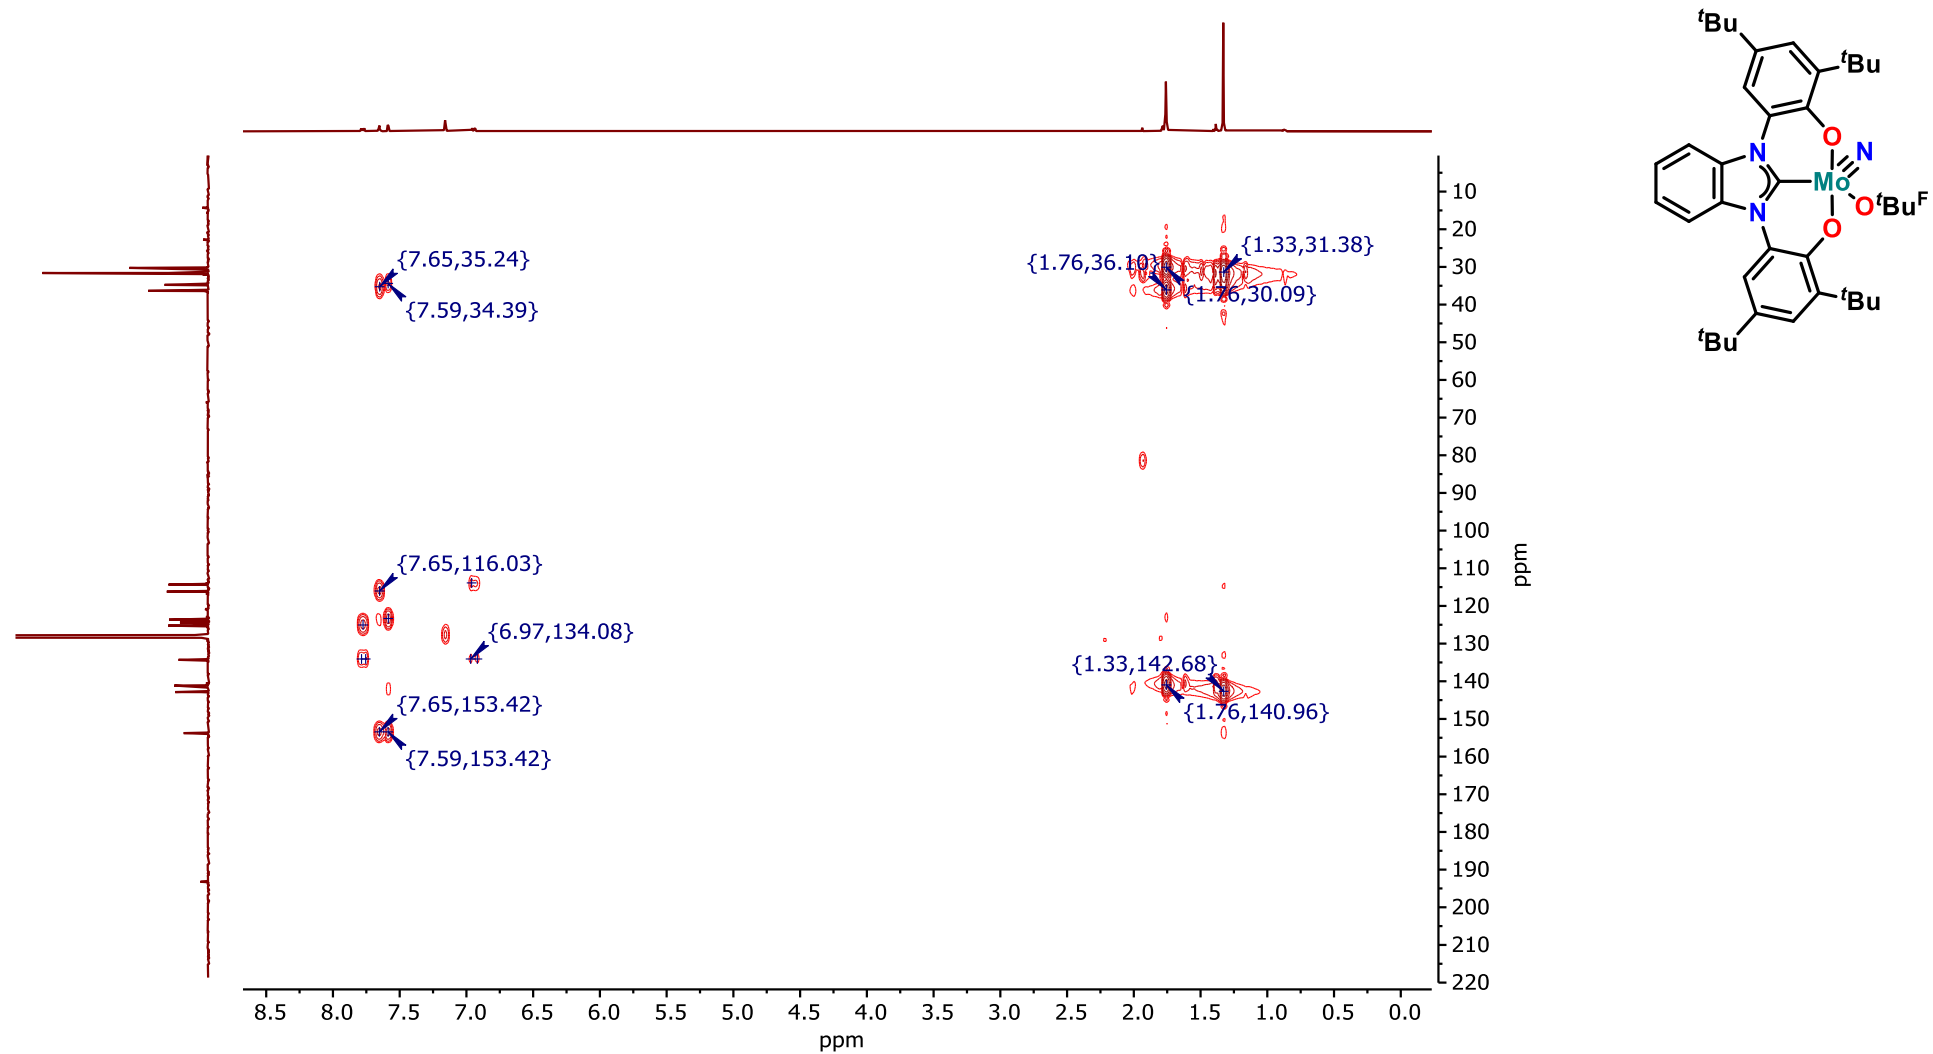

Figure S 40:  $^1\text{H} - ^{13}\text{C}$  HMBC of **2-O<sup>t</sup>BuF<sup>9</sup>** in  $\text{C}_6\text{D}_6$  at 298 K.

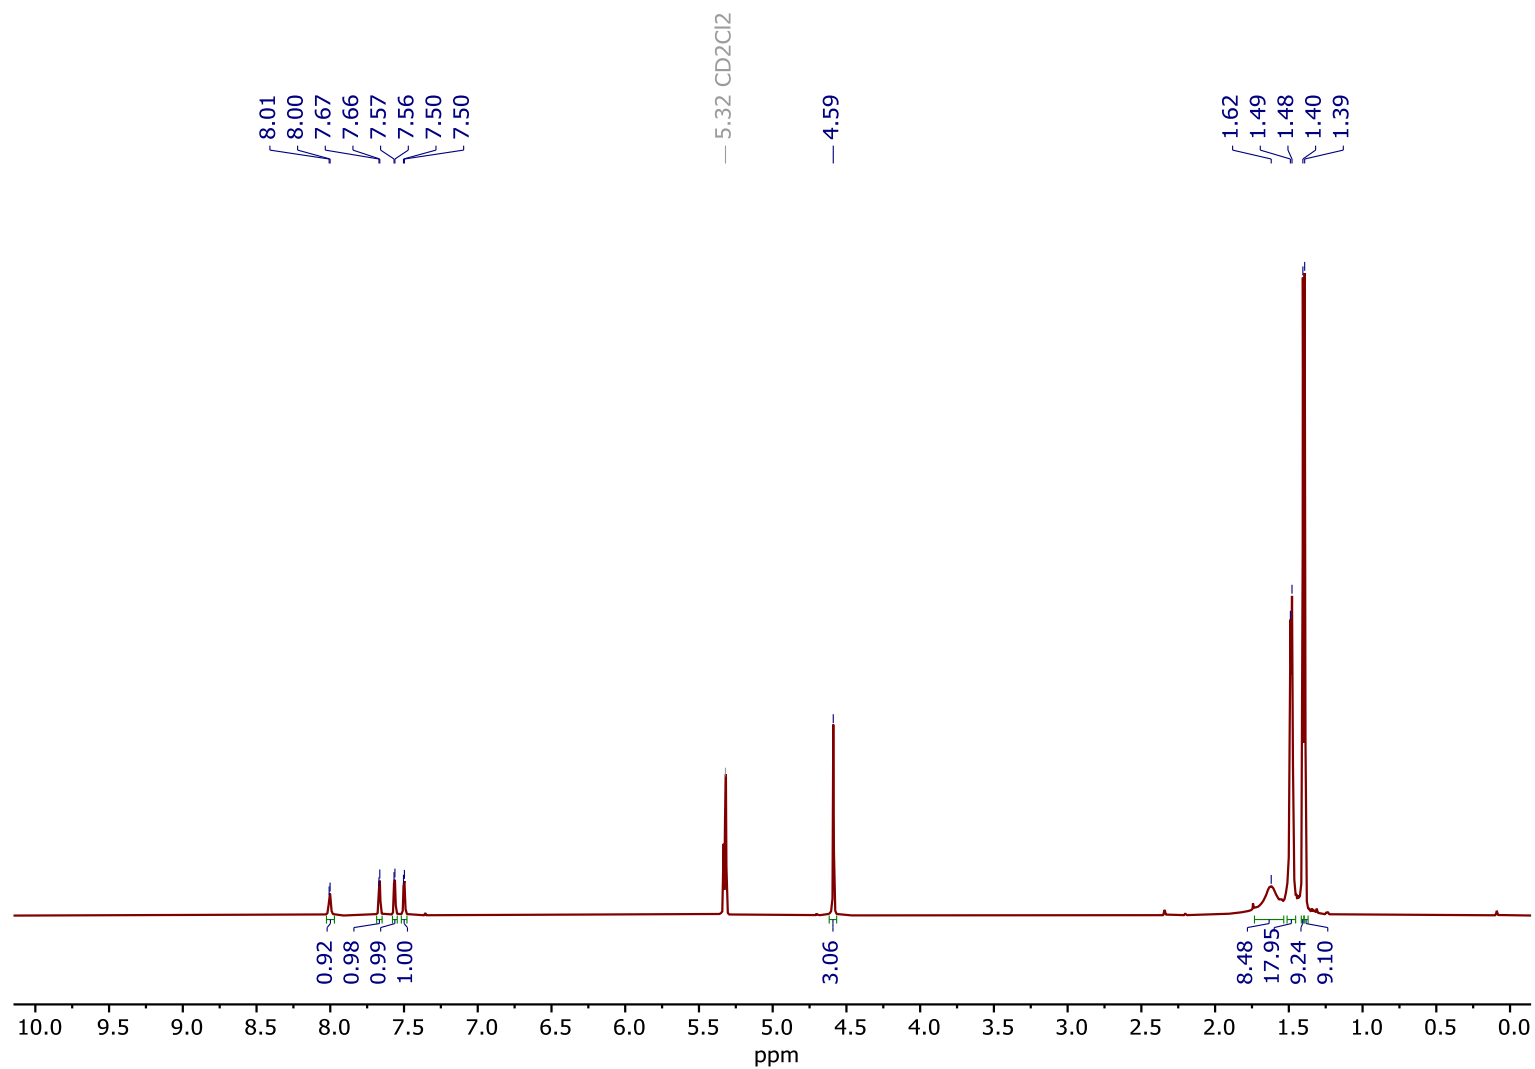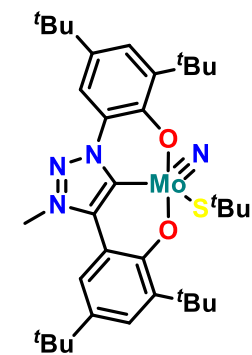

Figure S 41: <sup>1</sup>H NMR of **1-S<sup>t</sup>Bu** in CD<sub>2</sub>Cl<sub>2</sub> at 298 K.

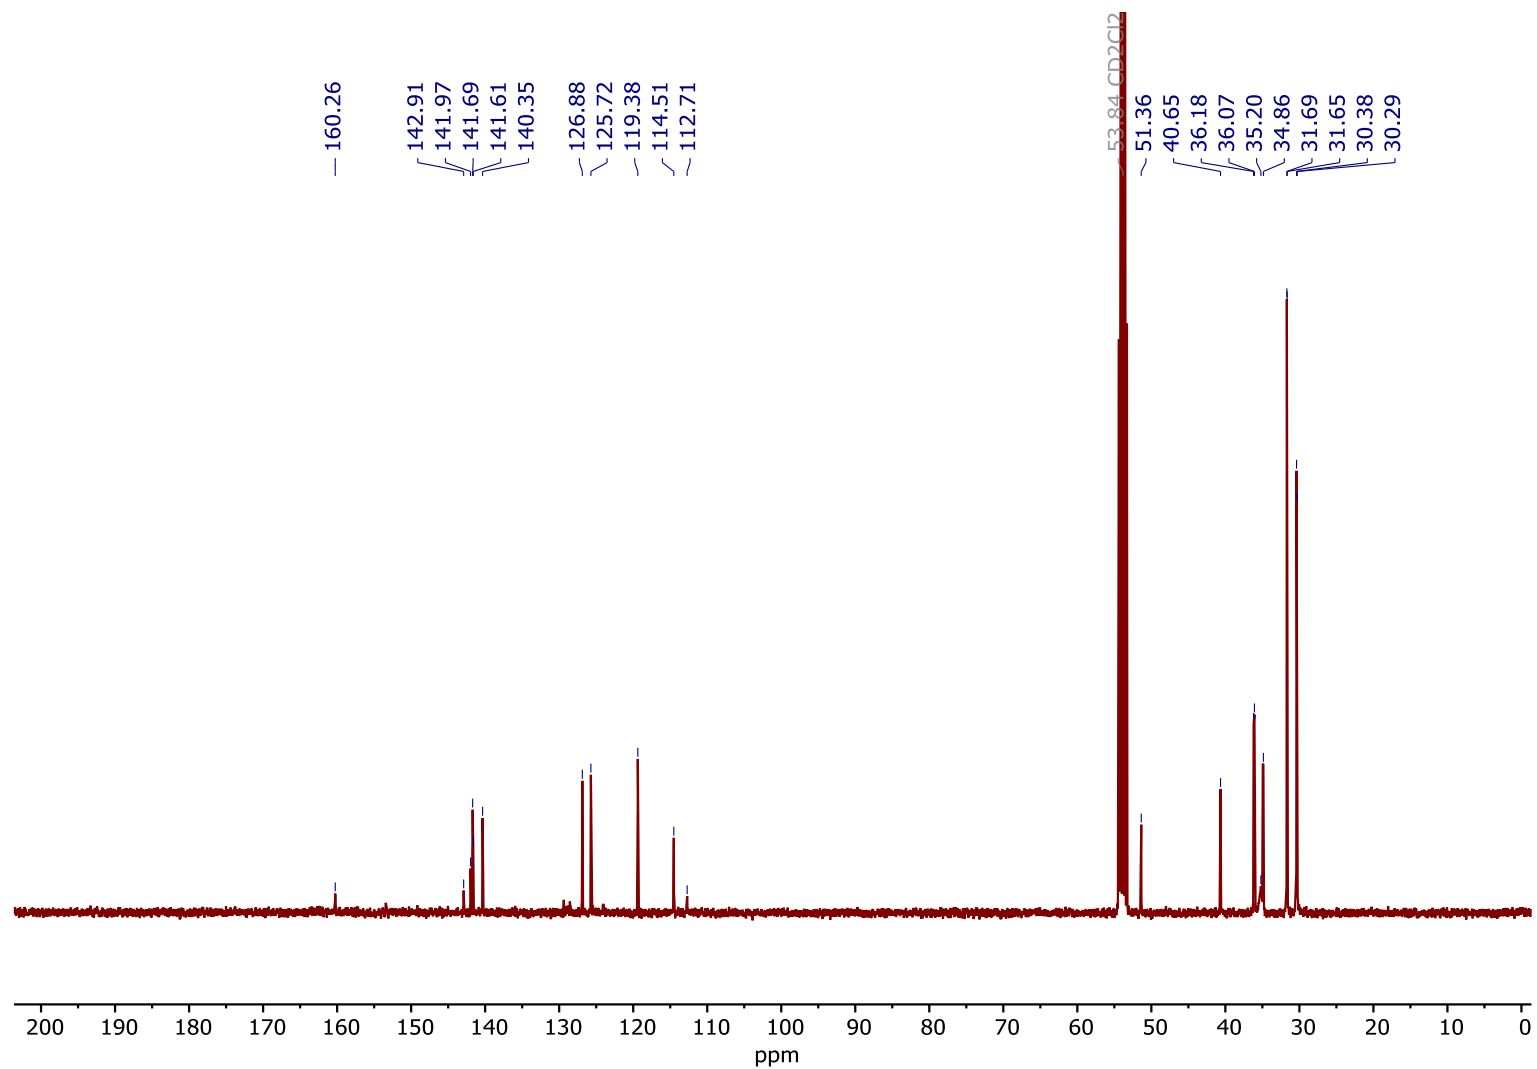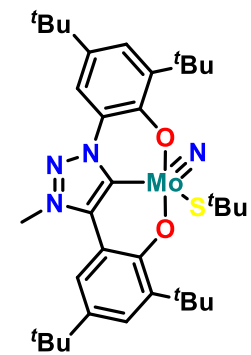

Figure S 42: <sup>13</sup>C NMR of **1-tBu** in CD<sub>2</sub>Cl<sub>2</sub> at 298 K.

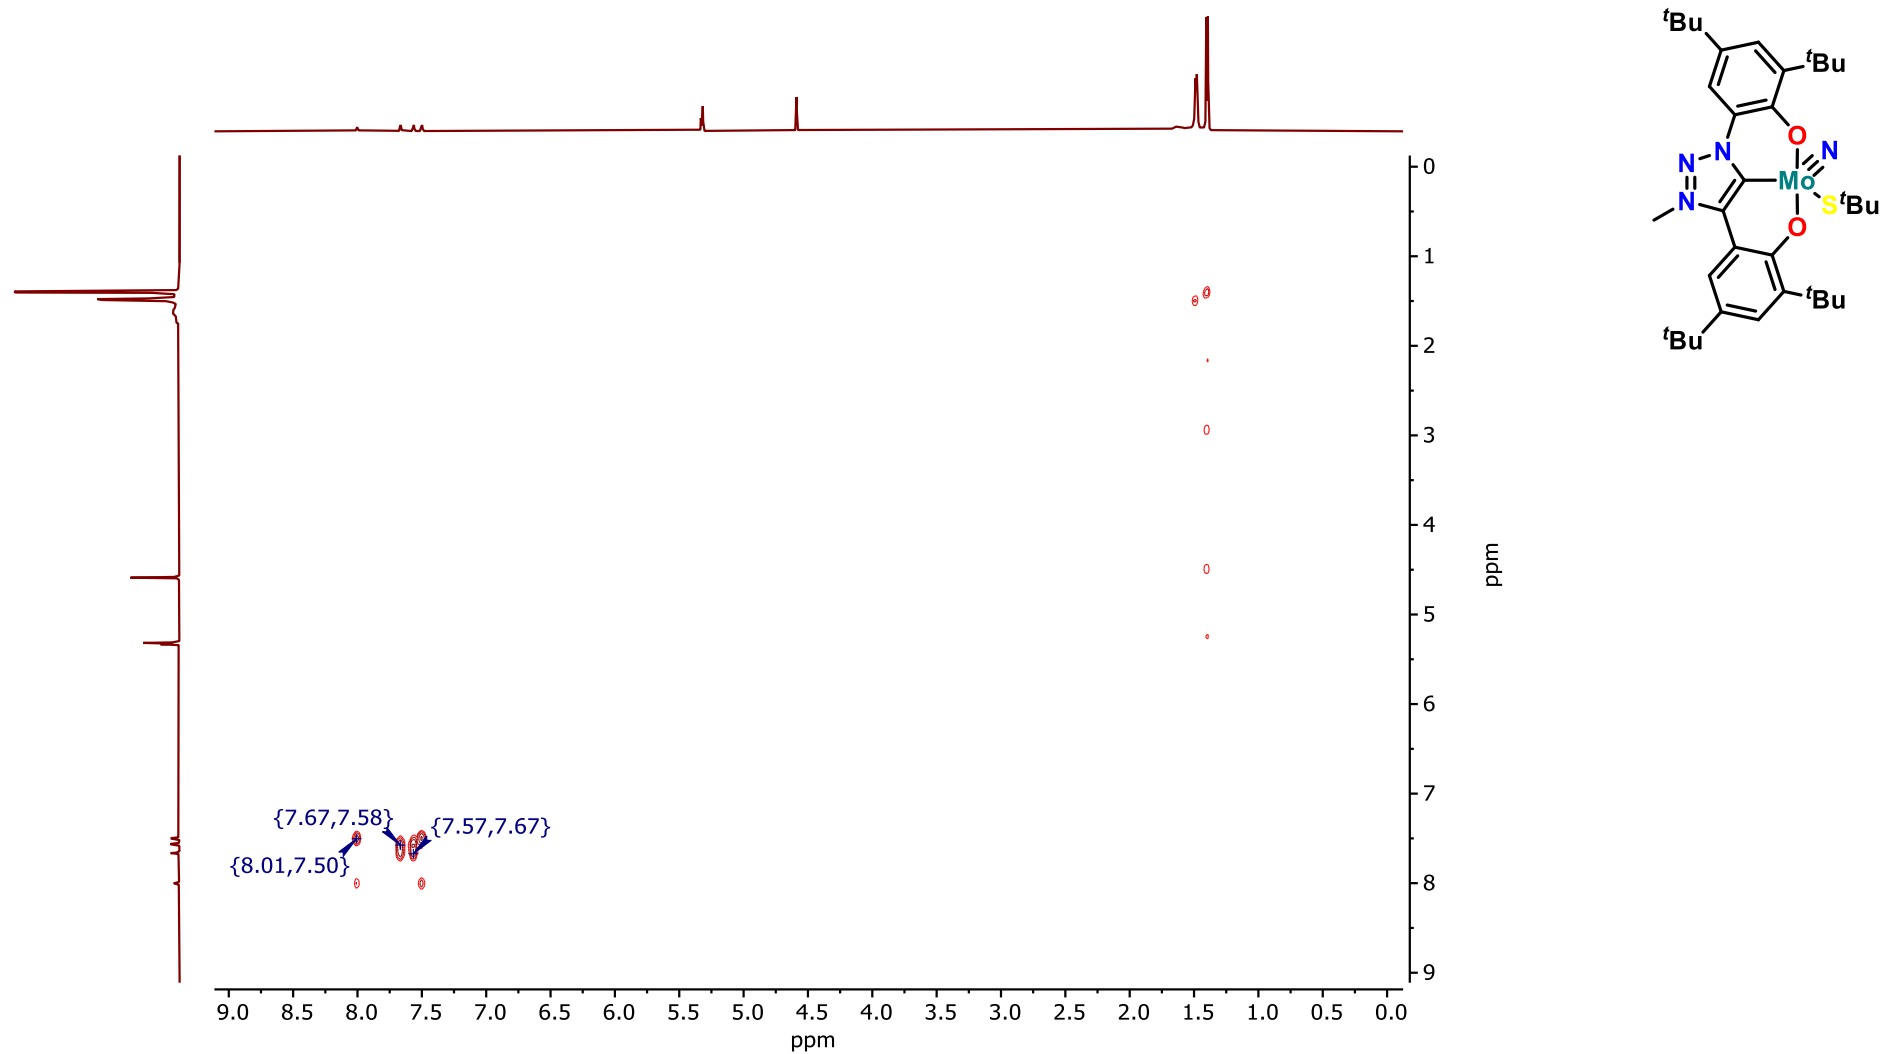

Figure S 43:  $^1\text{H}$  -  $^1\text{H}$  COSY of **1-tBu** in  $\text{CD}_2\text{Cl}_2$  at 298 K.



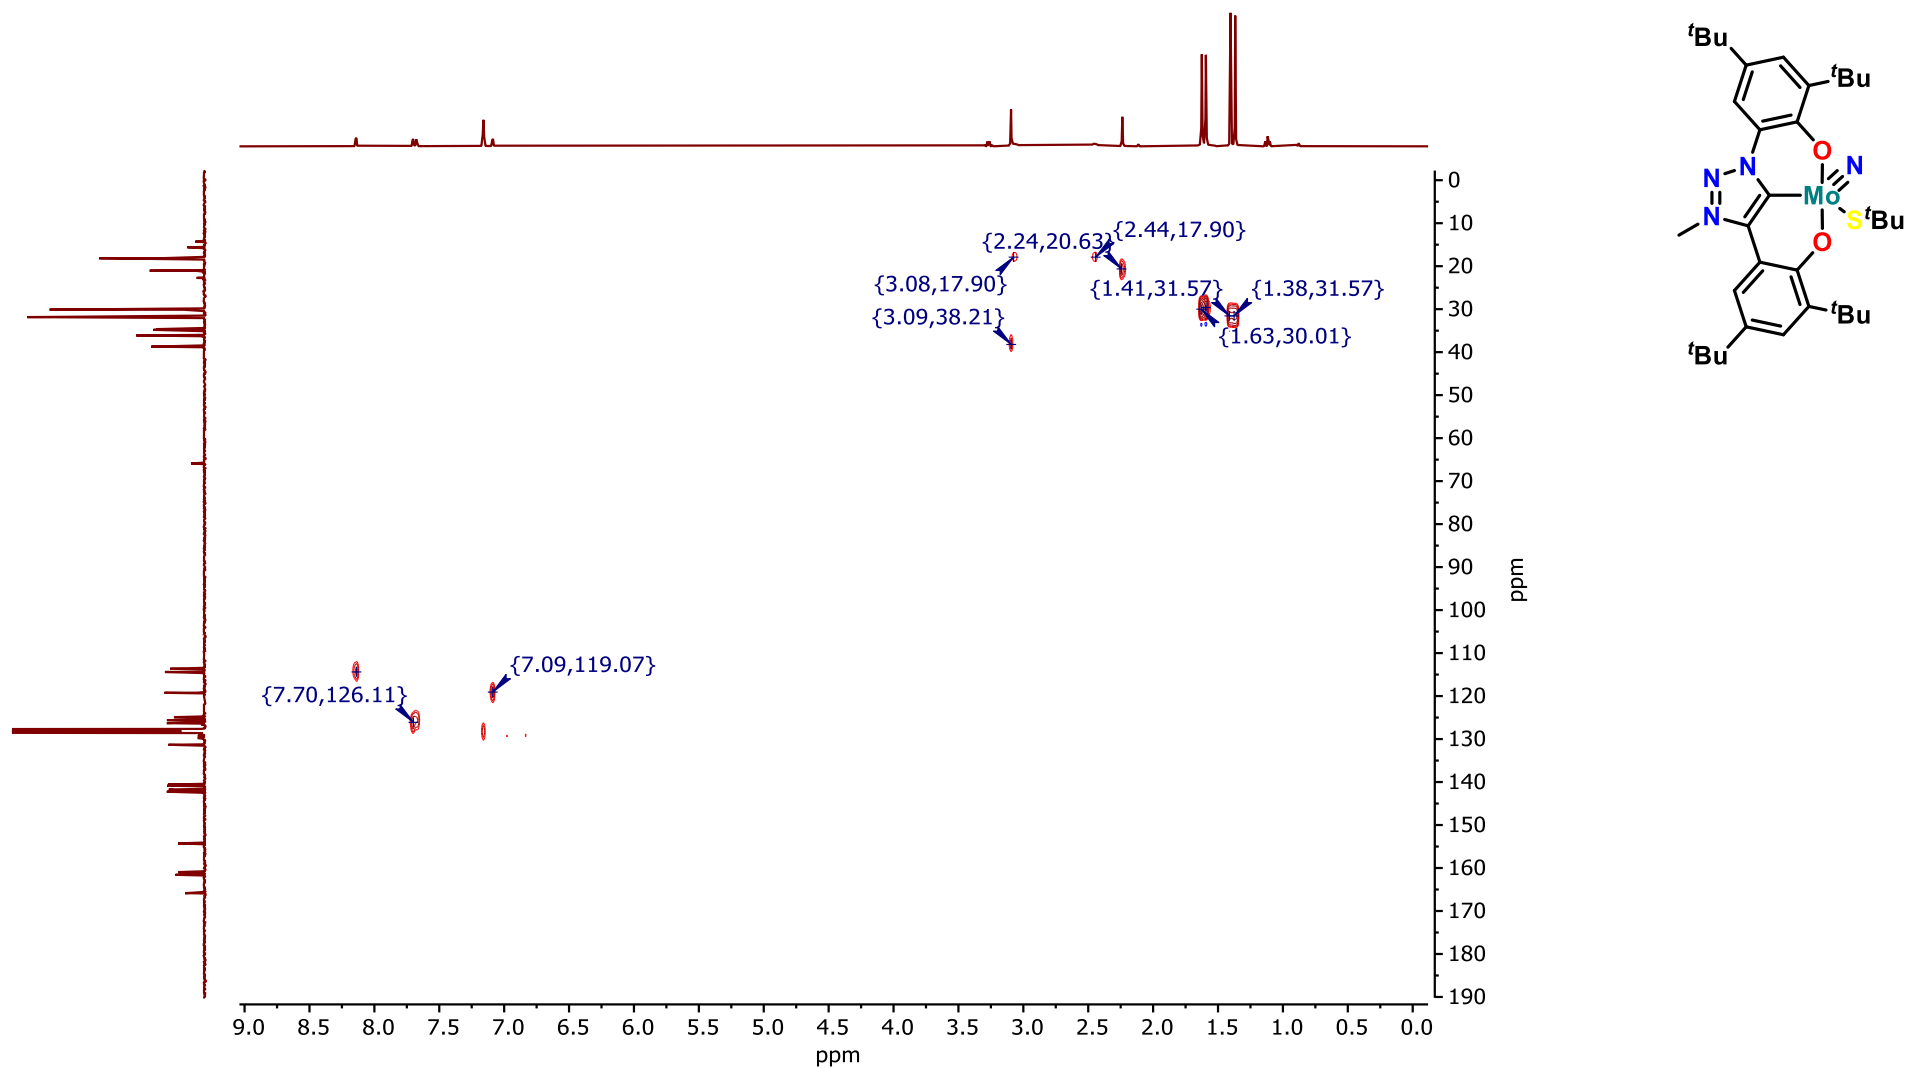

Figure S 44:  $^1\text{H}$  -  $^{13}\text{C}$  HSQC of **1-tBu** in  $\text{CD}_2\text{Cl}_2$  at 298 K.

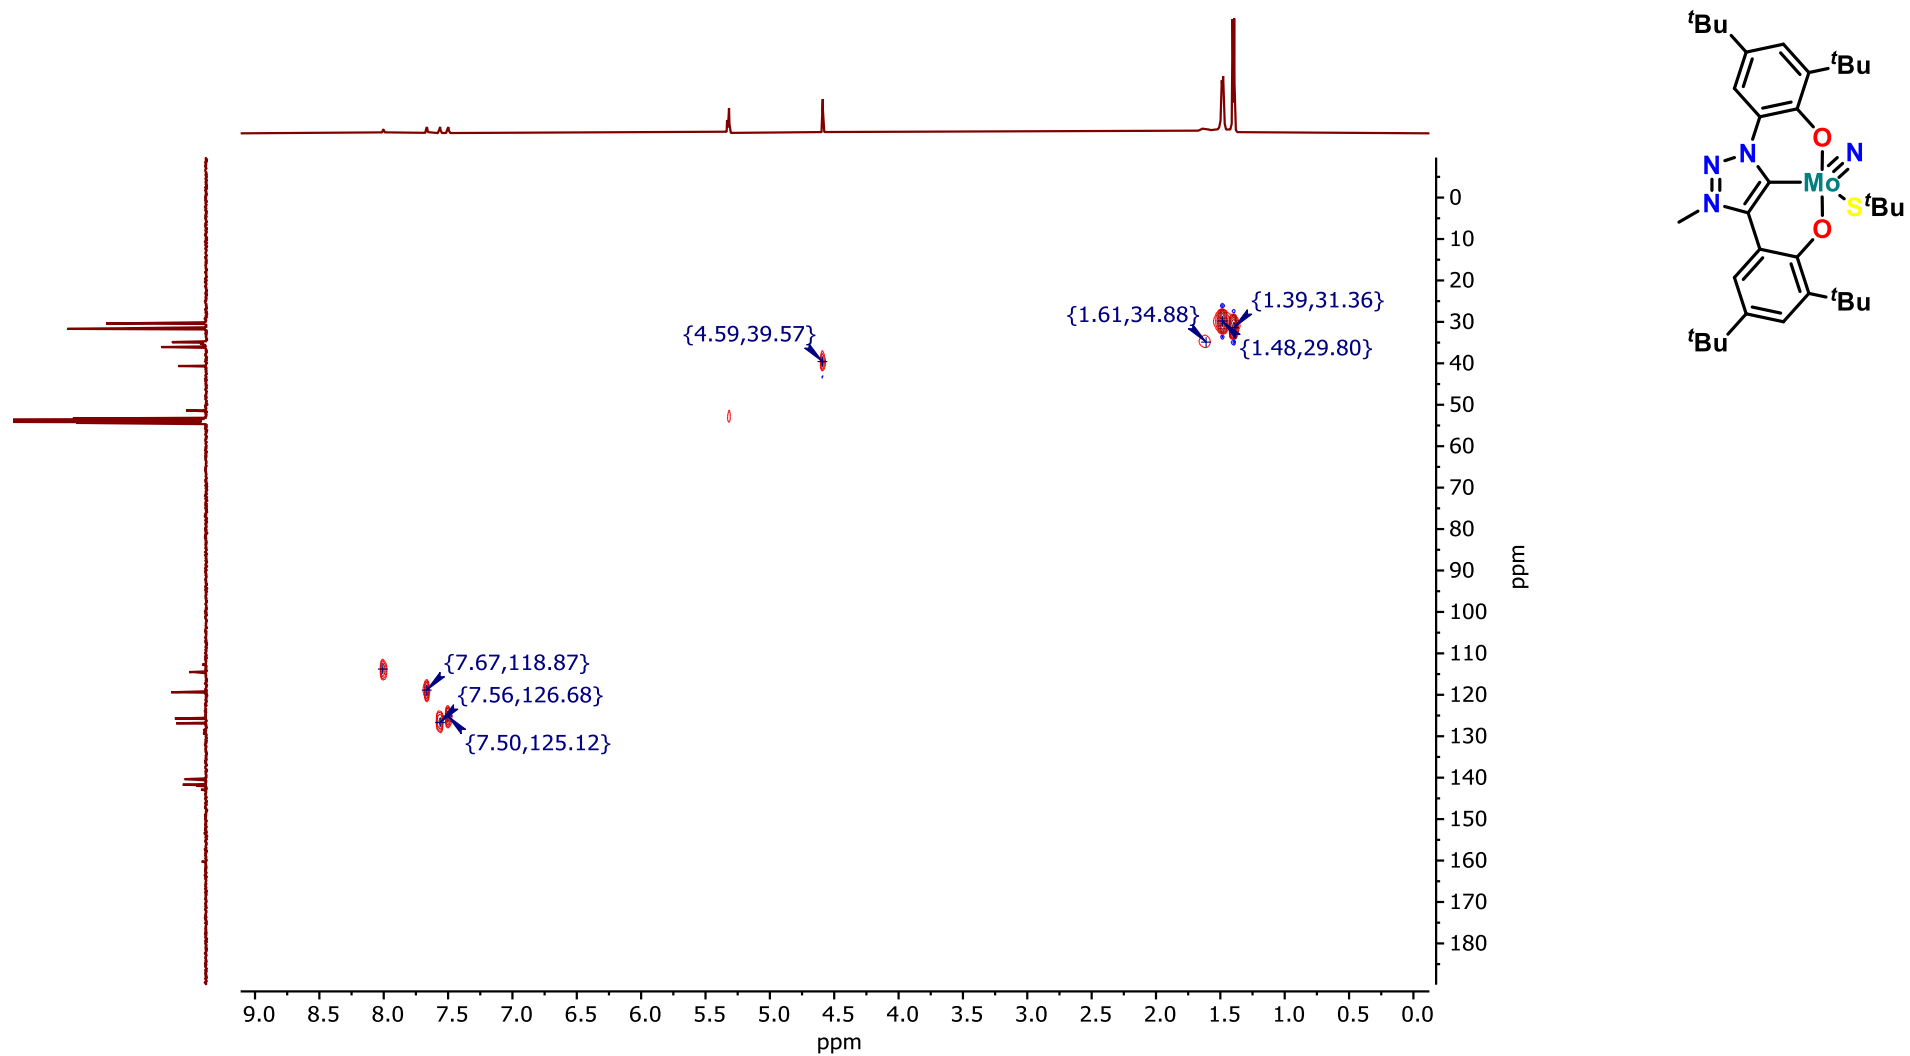

Figure S 45:  $^1\text{H} - ^{13}\text{C}$  HMBC of **1-S'Bu** in  $\text{CD}_2\text{Cl}_2$  at 298 K.

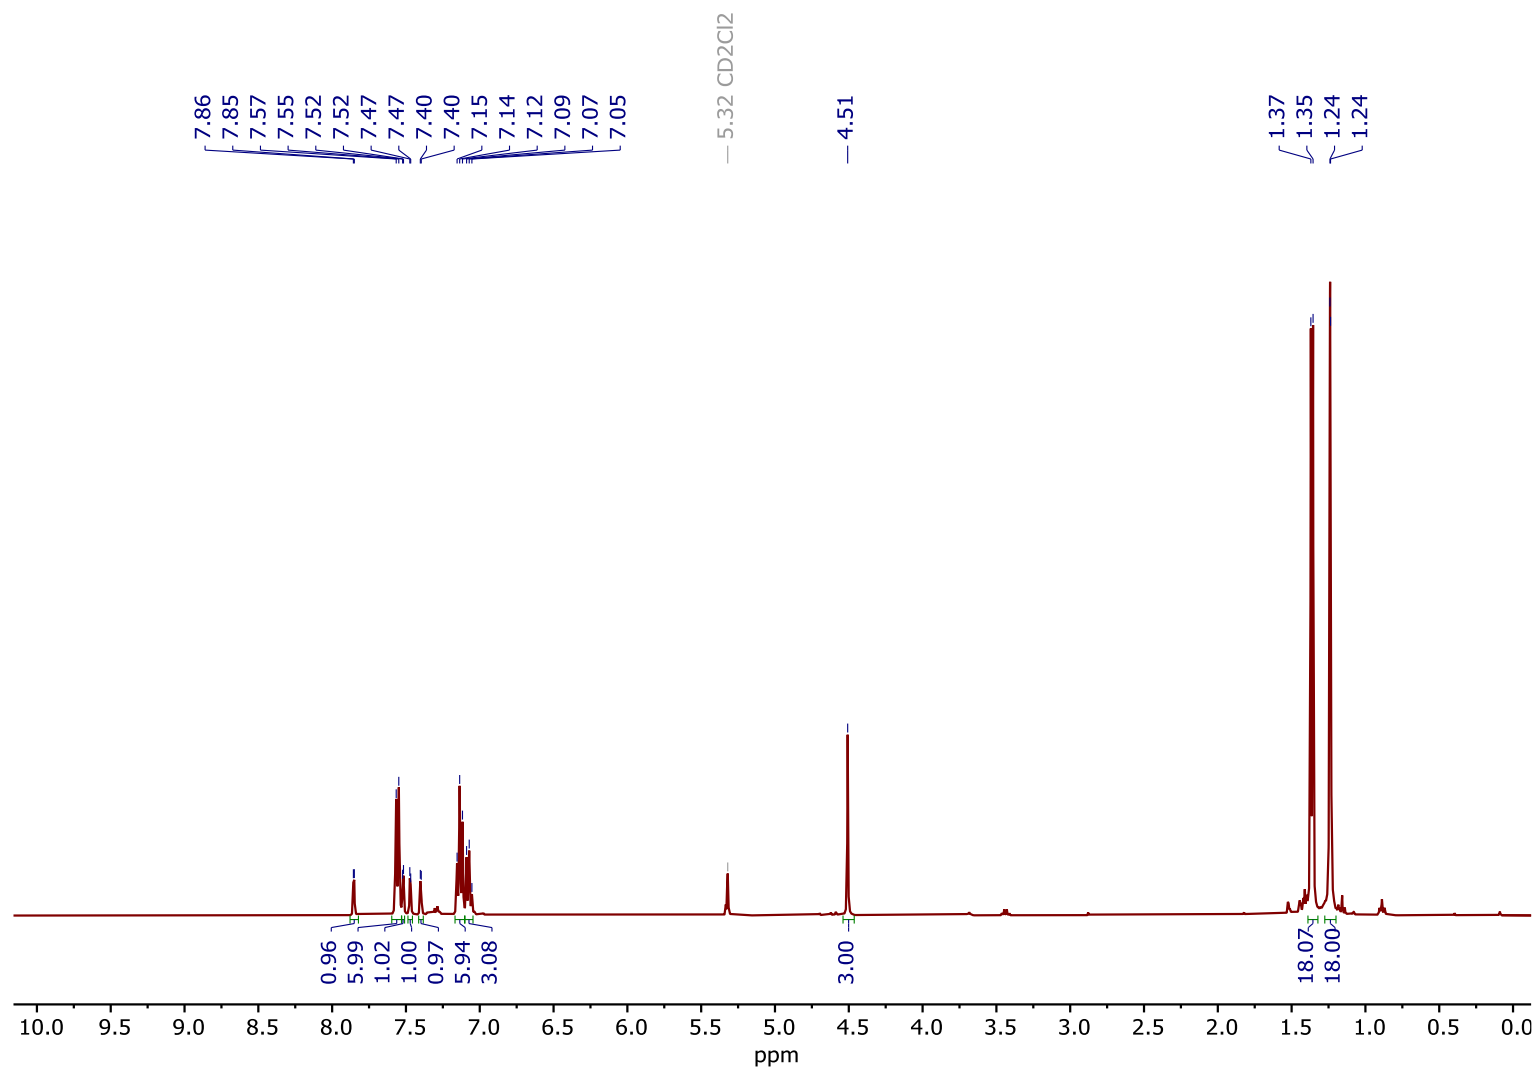

Figure S 46:  $^1\text{H}$  NMR of **1-OCPh<sub>3</sub>** in  $\text{CD}_2\text{Cl}_2$  at 298 K.

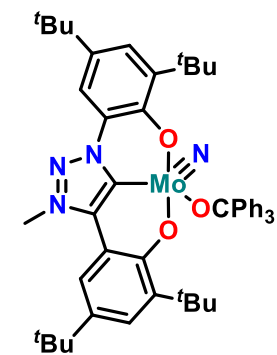

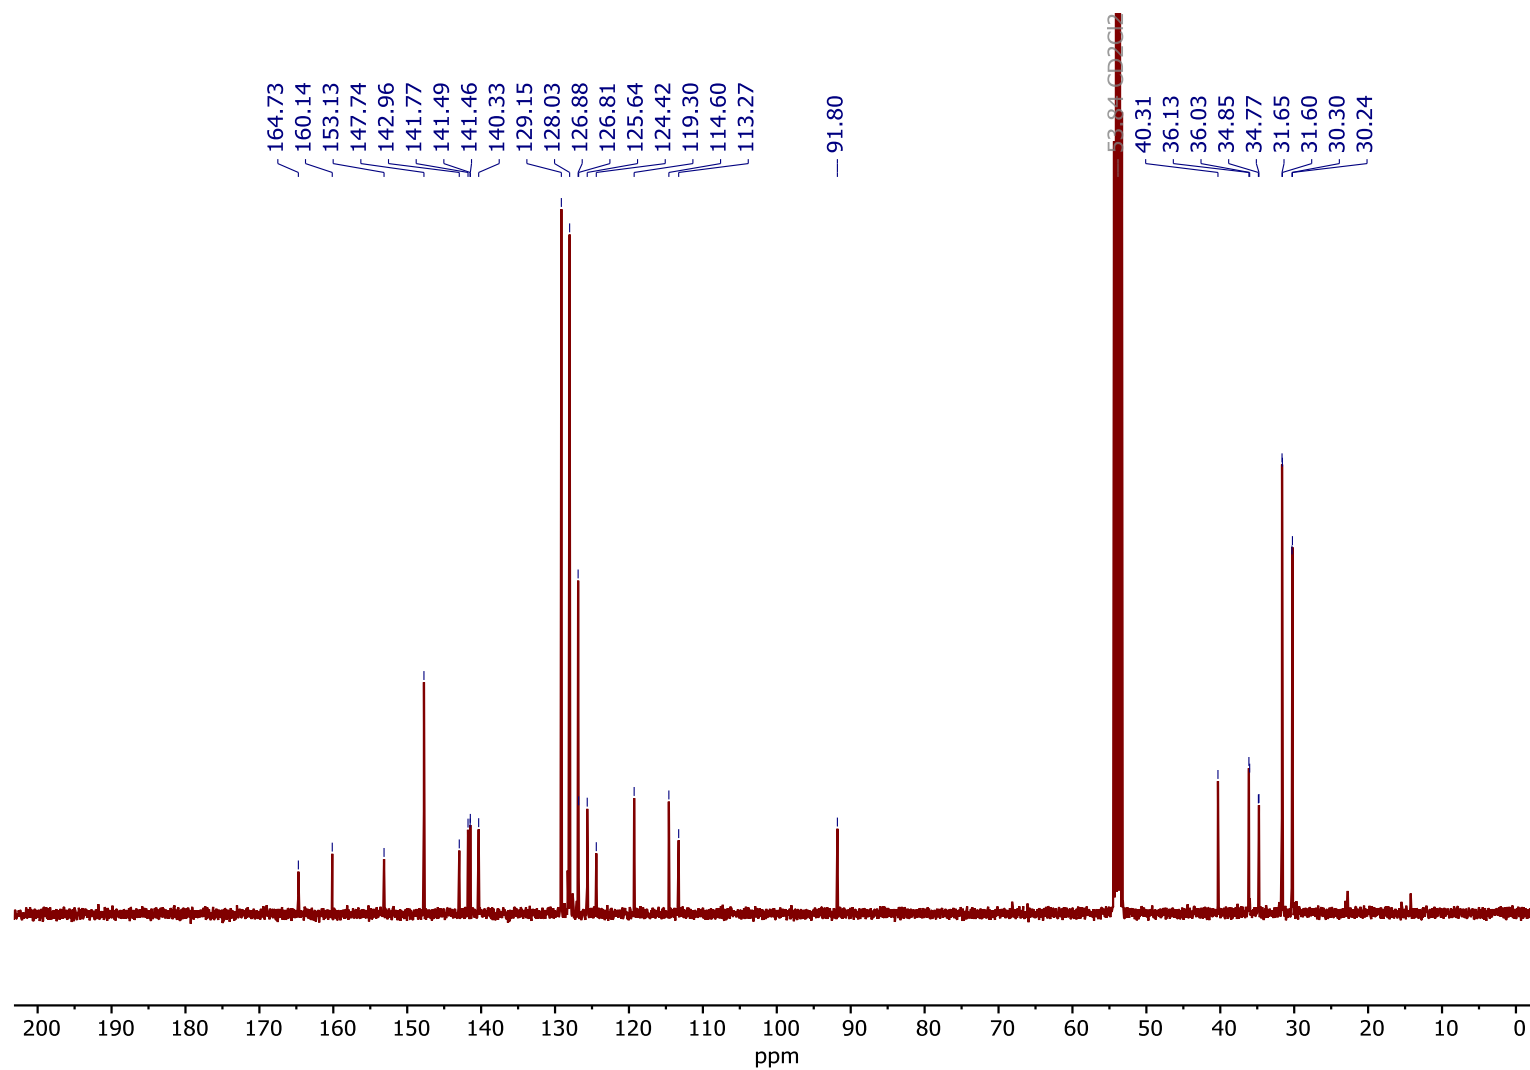

Figure S 47: <sup>13</sup>C NMR of **1-OCPh<sub>3</sub>** in CD<sub>2</sub>Cl<sub>2</sub> at 298 K.

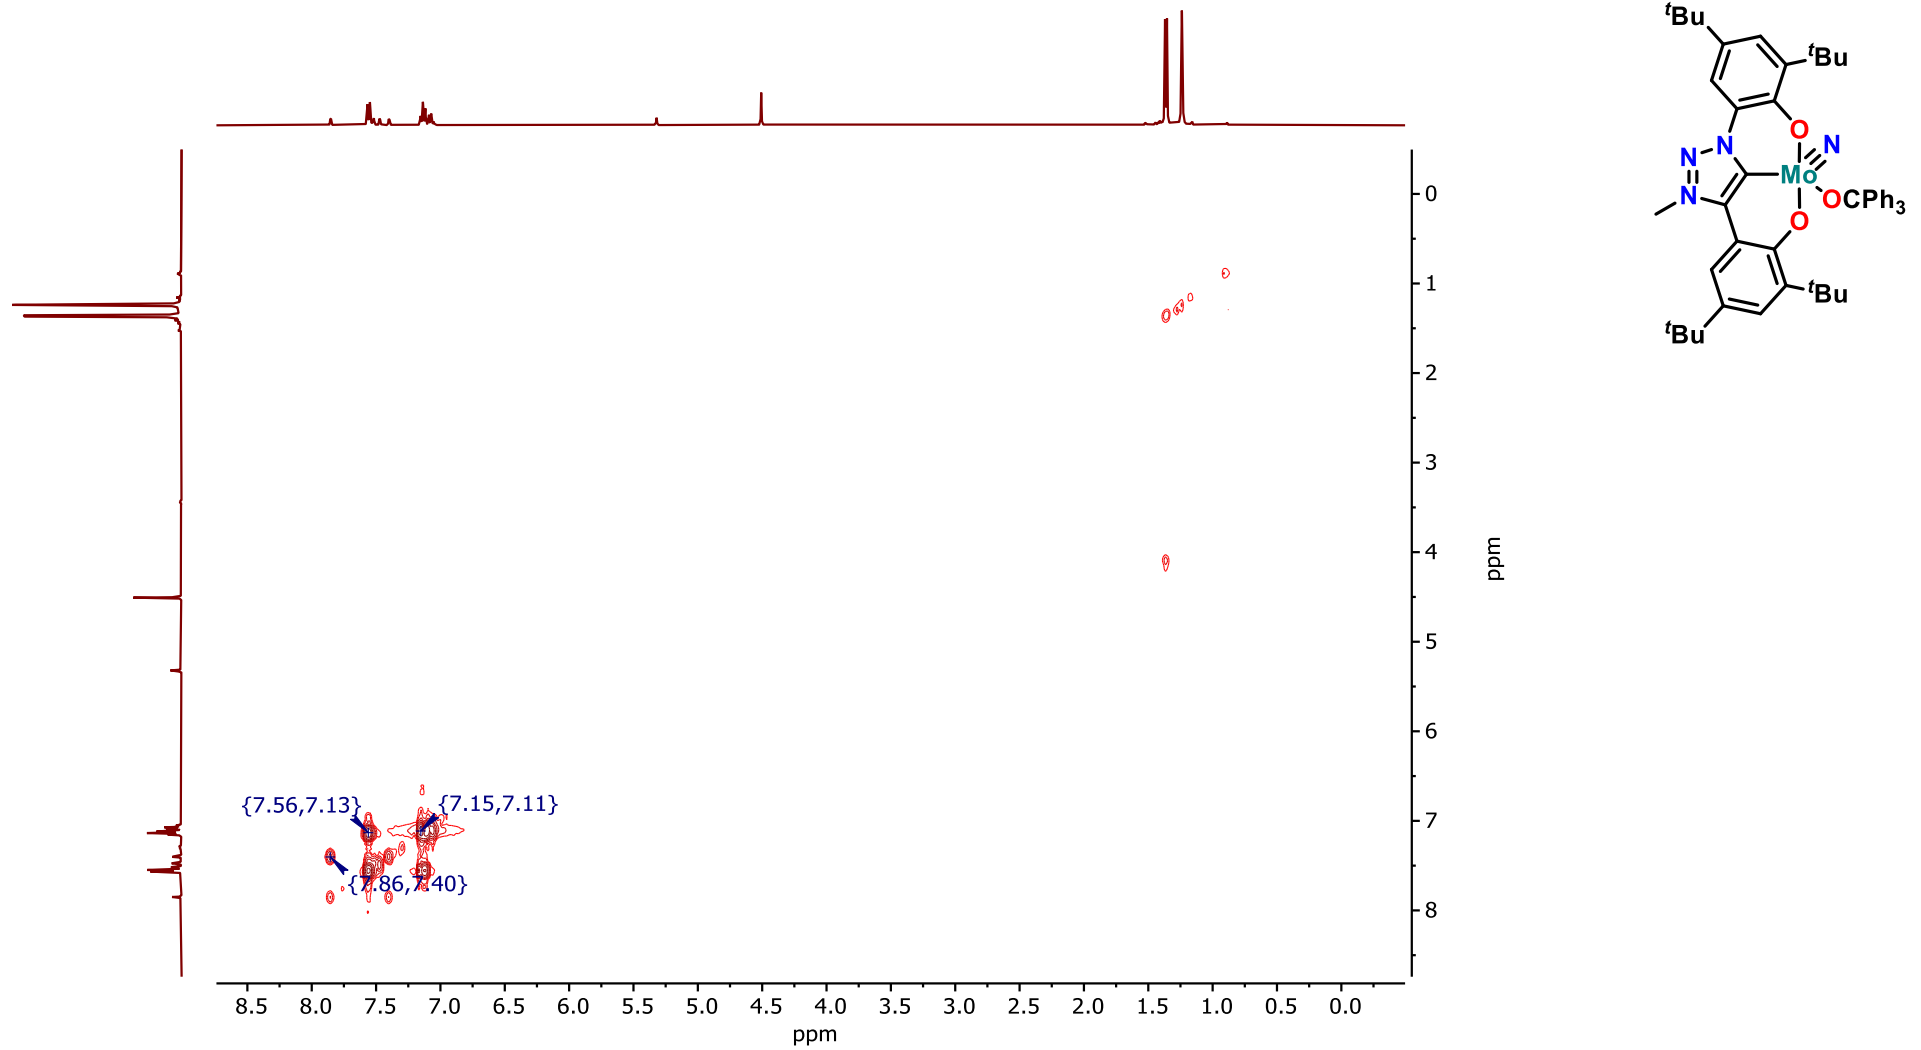

Figure S 48:  $^1\text{H} - ^1\text{H}$  COSY of **1-OCPh<sub>3</sub>** in  $\text{CD}_2\text{Cl}_2$  at 298 K.

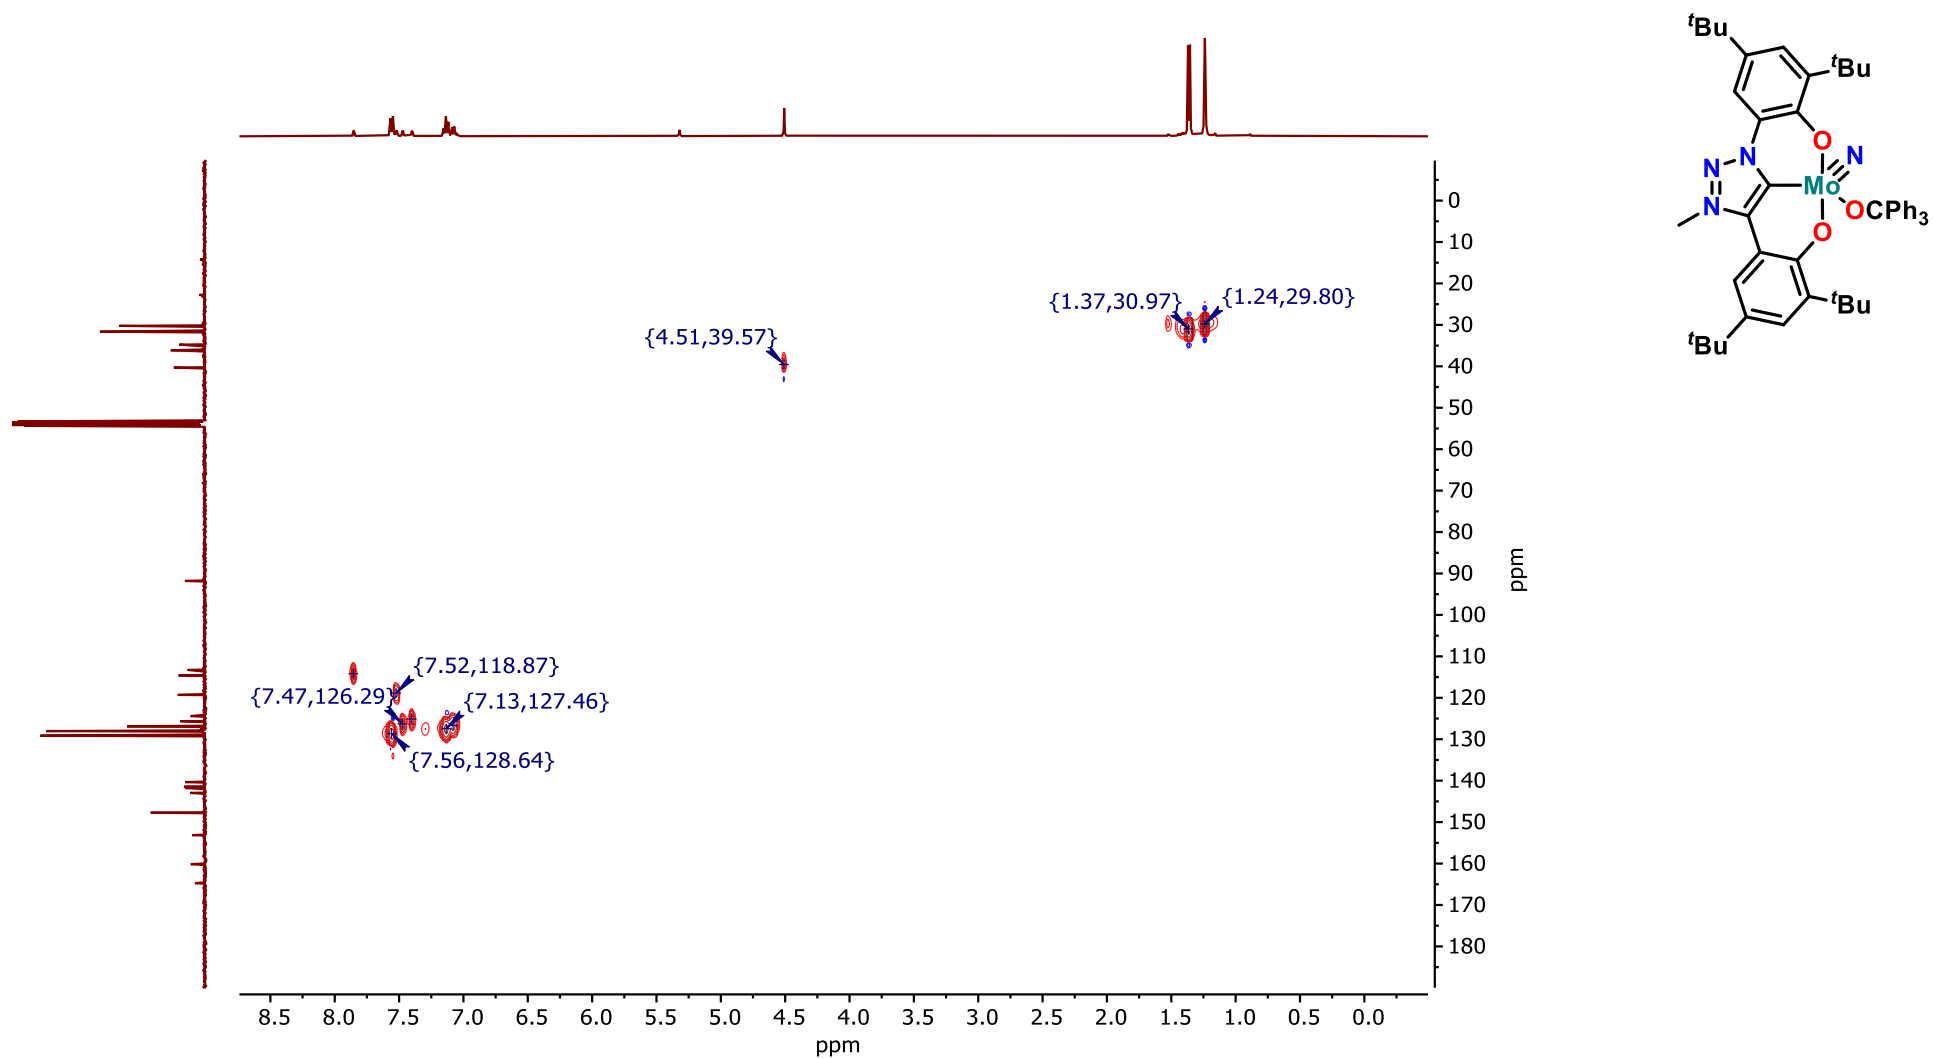

Figure S 49: <sup>1</sup>H – <sup>13</sup>C HSQC of **1-OCPh<sub>3</sub>** in CD<sub>2</sub>Cl<sub>2</sub> at 298 K.

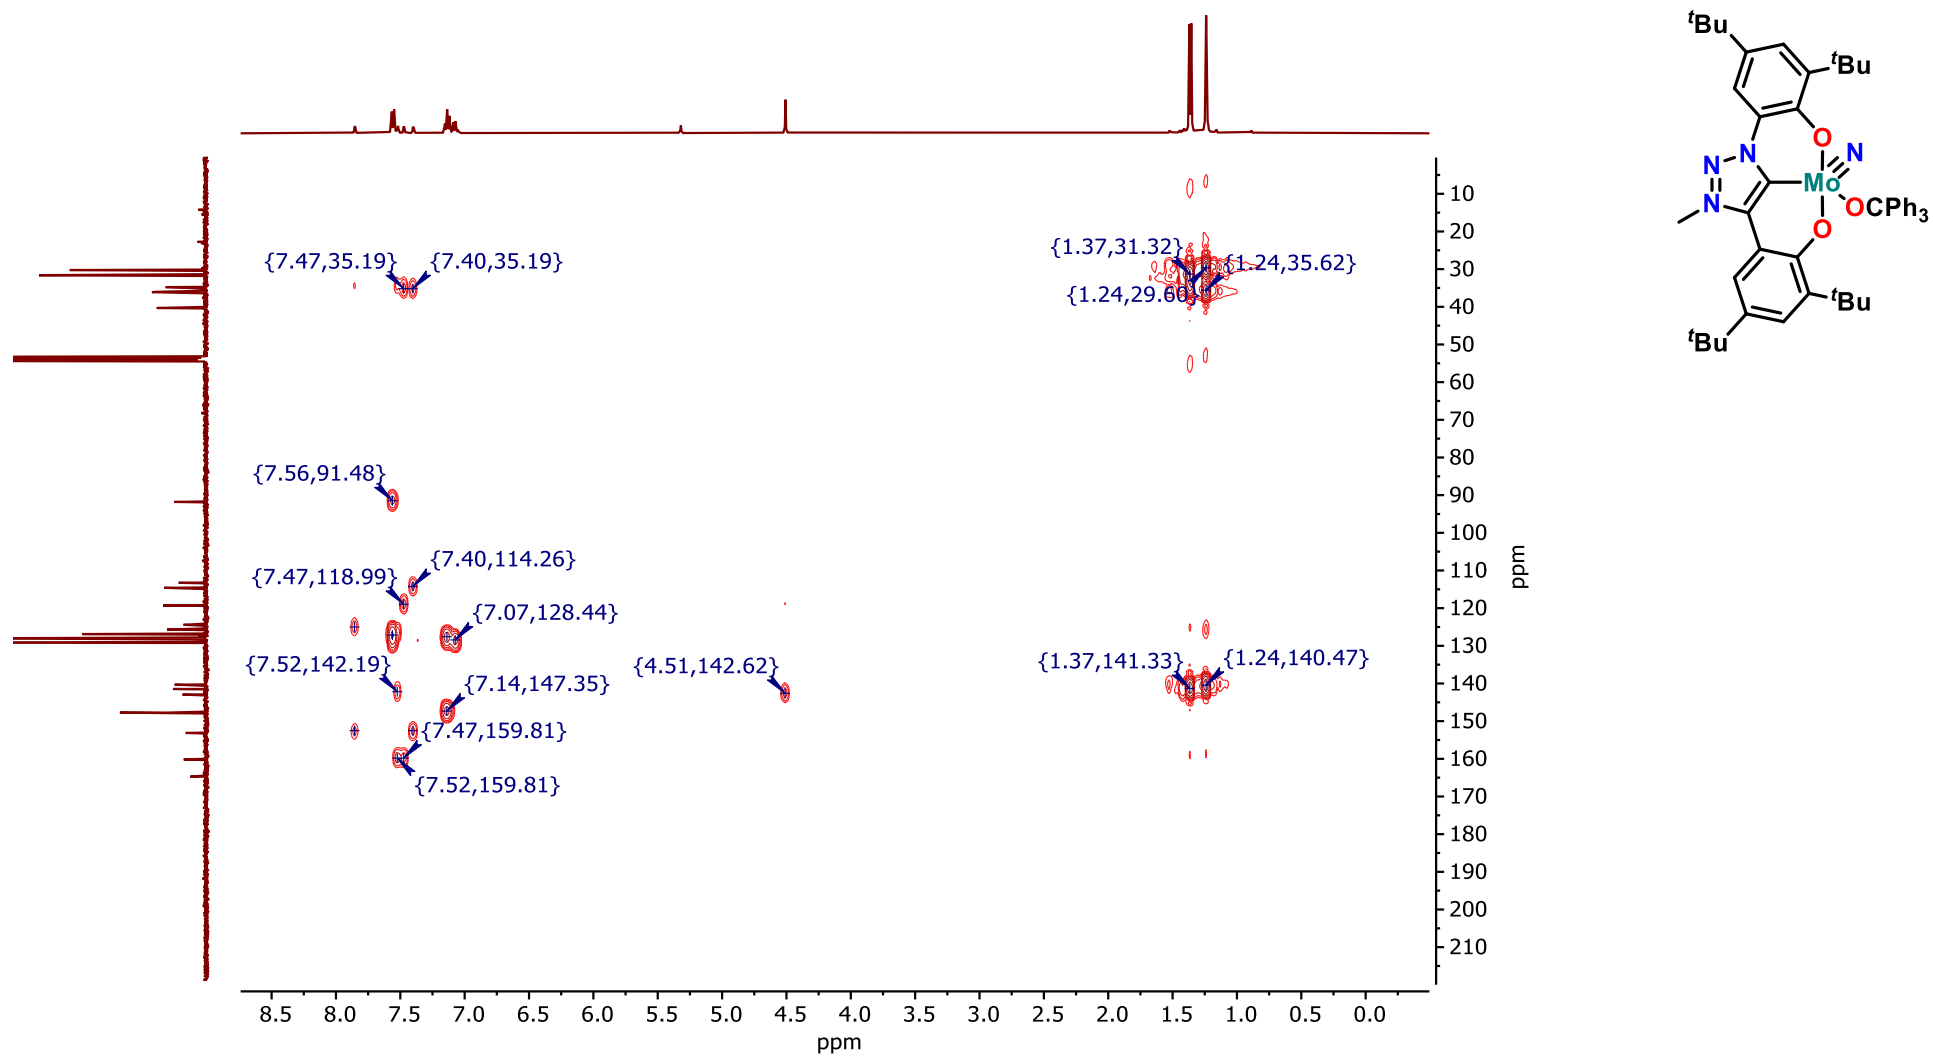

Figure S 50:  $^1\text{H} - ^{13}\text{C}$  HMBC of **1-OCPh<sub>3</sub>** in  $\text{CD}_2\text{Cl}_2$  at 298 K.

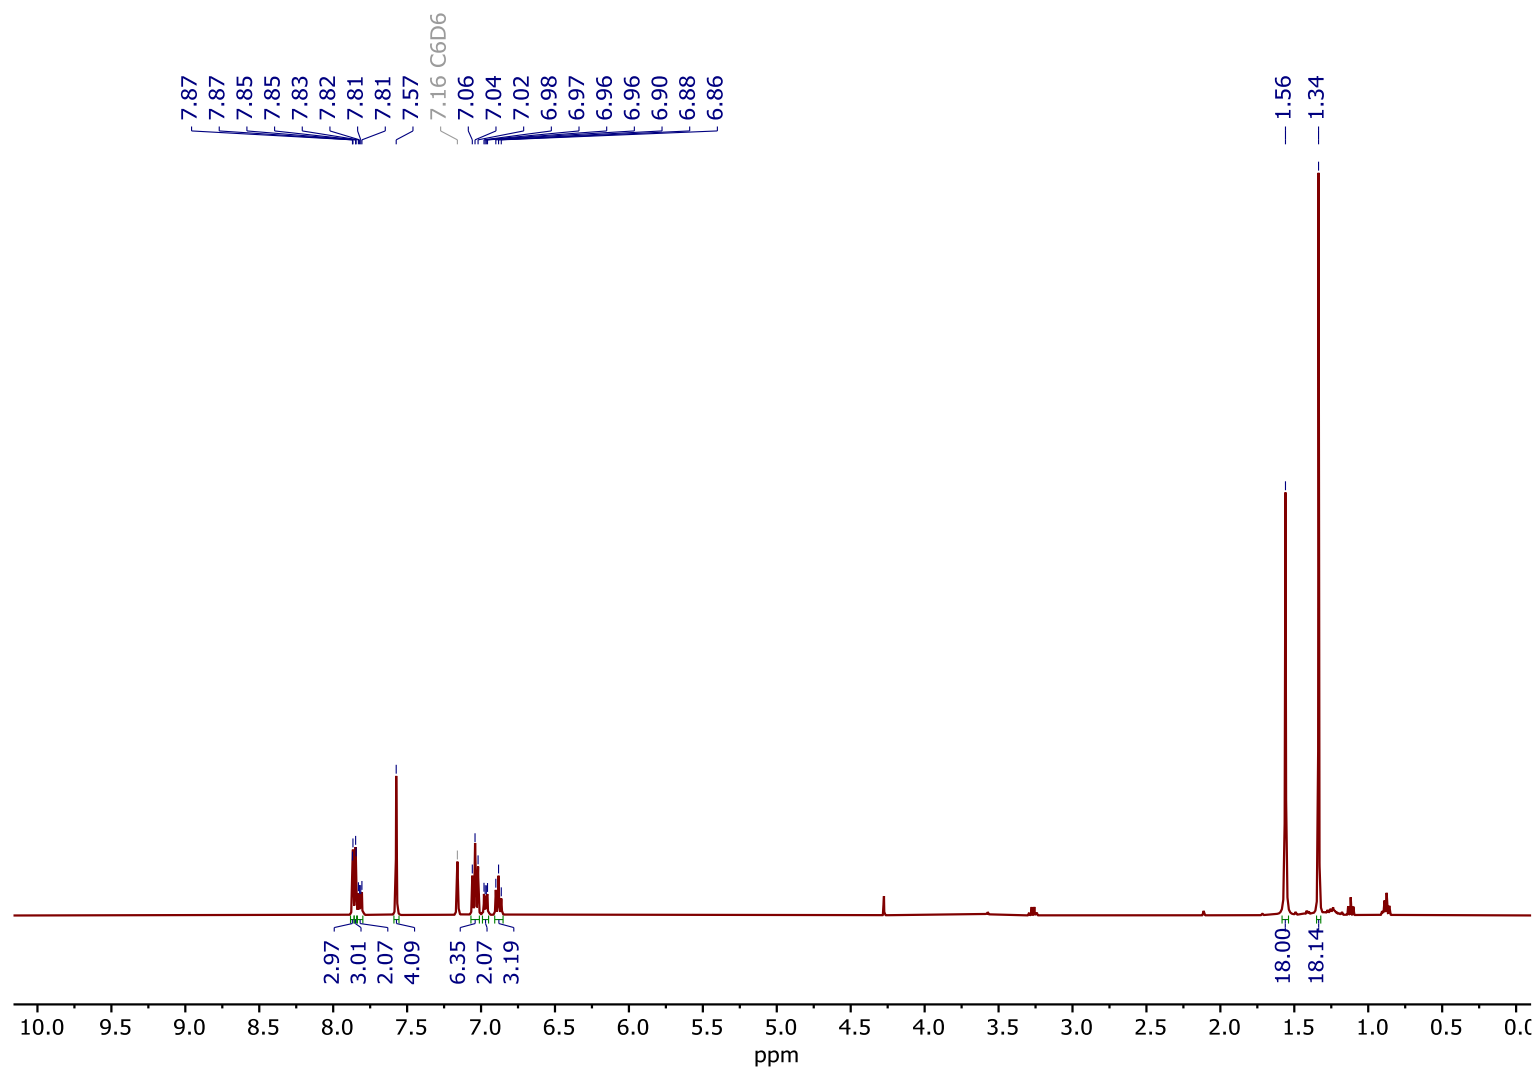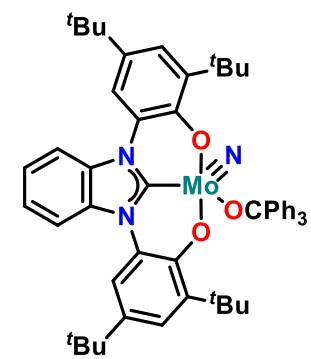

Figure S 51:  $^1\text{H}$  NMR of **2-OCPh<sub>3</sub>** in  $\text{C}_6\text{D}_6$  at 298 K.



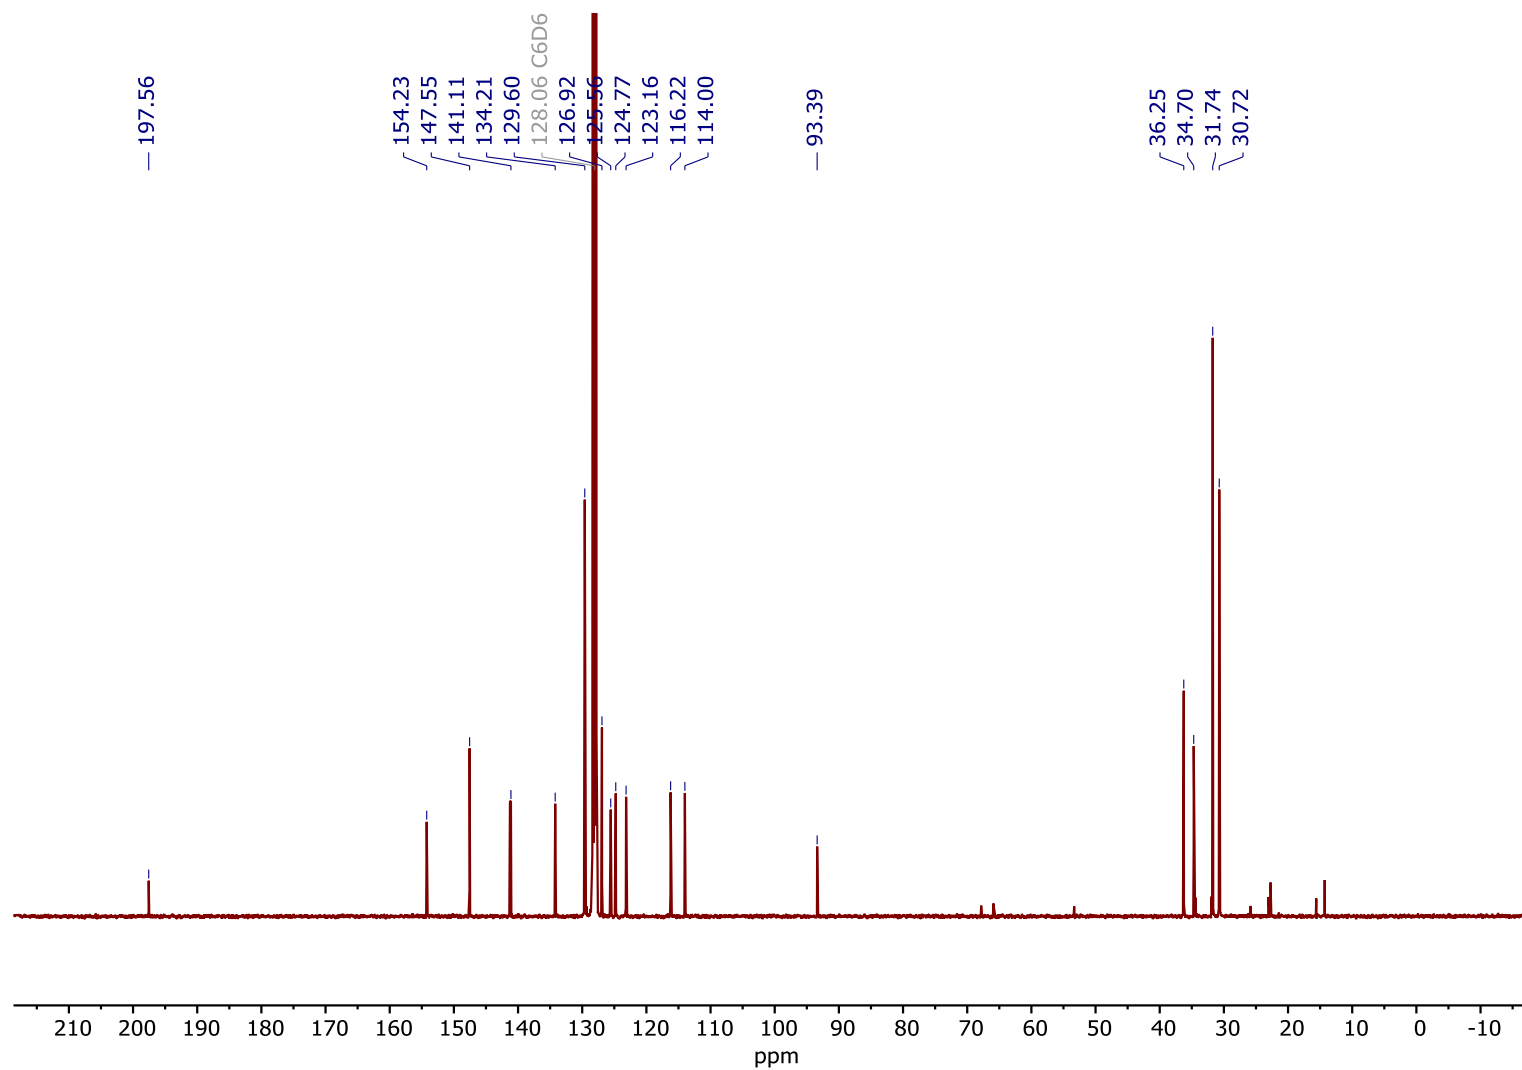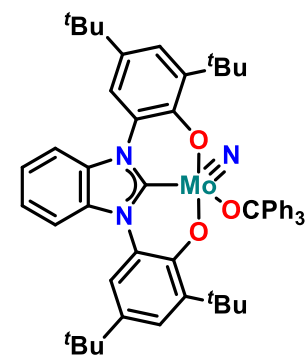

Figure S 52:  $^{13}\text{C}$  NMR of **2-OCPh<sub>3</sub>** in  $\text{C}_6\text{D}_6$  at 298 K.

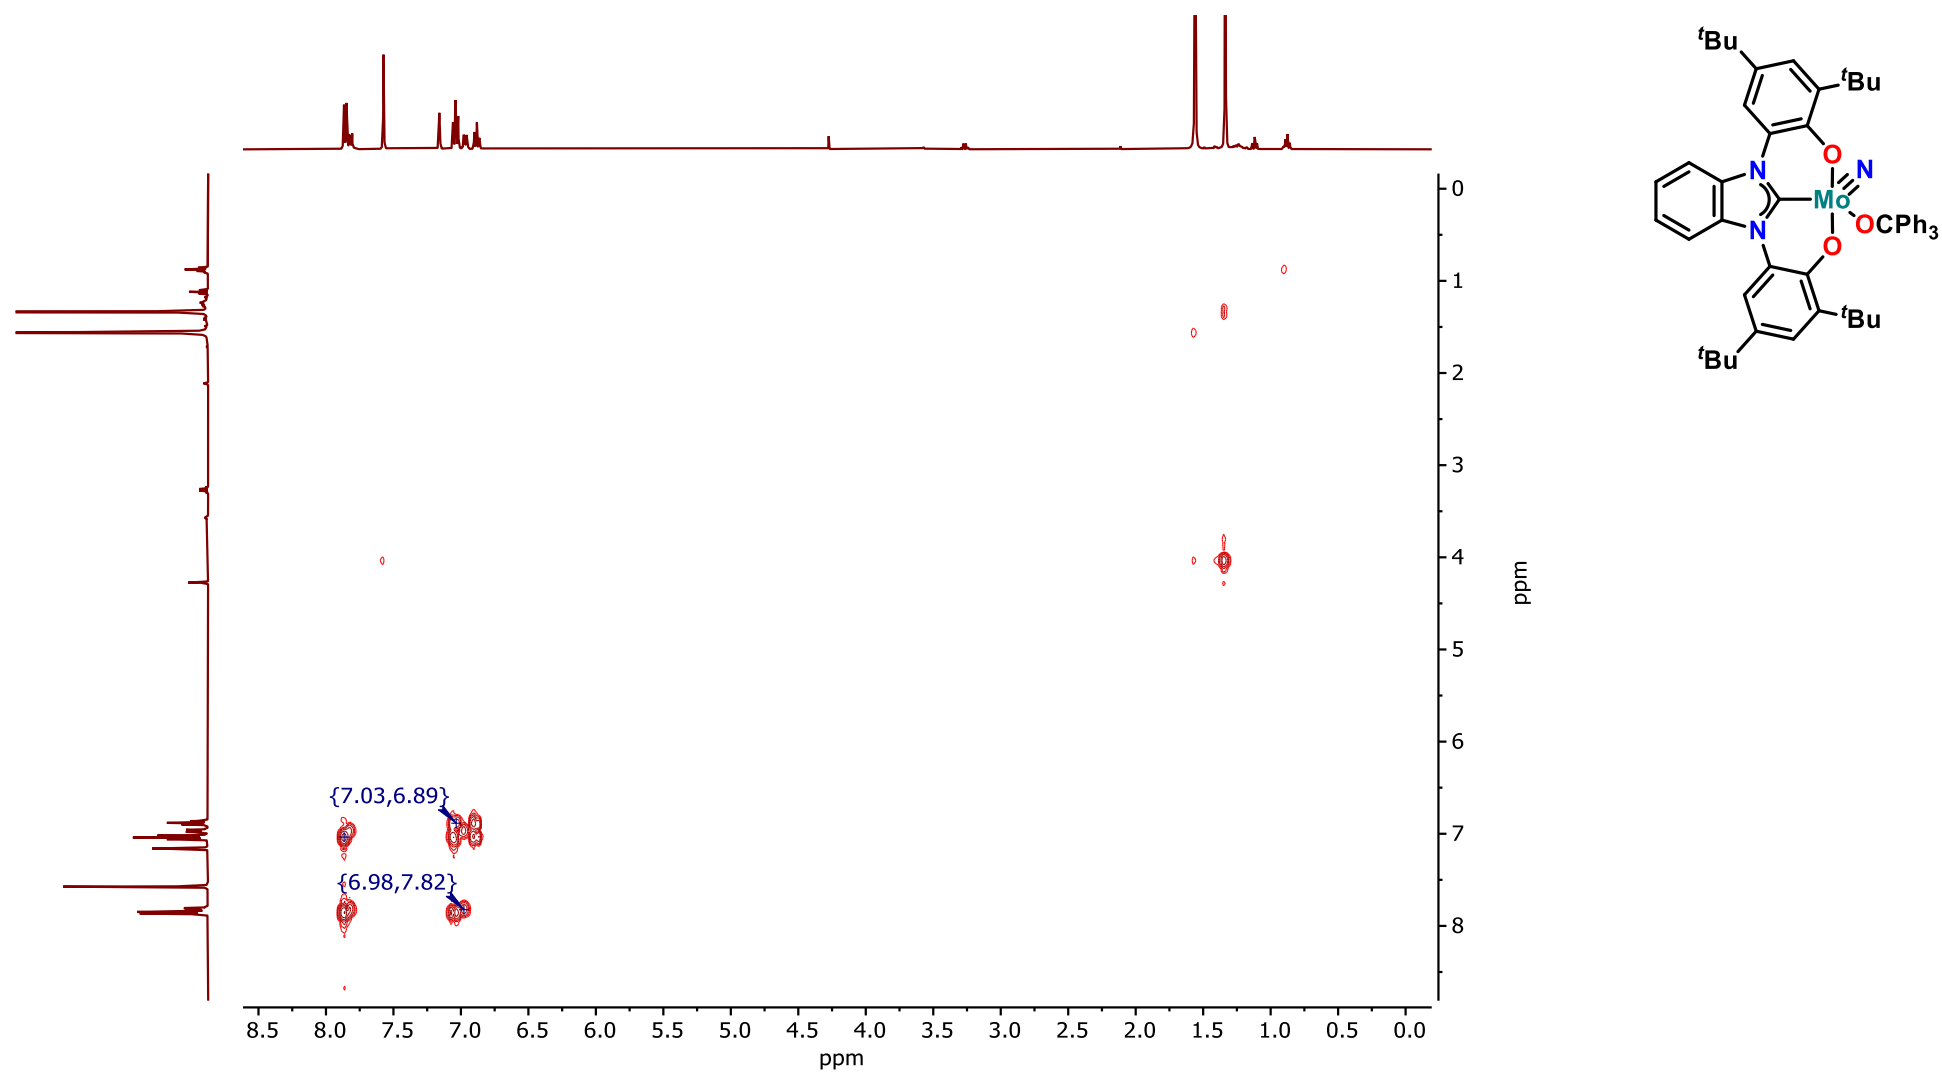

Figure S 53:  $^1\text{H} - ^1\text{H}$  COSY of **2-OCPh<sub>3</sub>** in  $\text{C}_6\text{D}_6$  at 298 K.

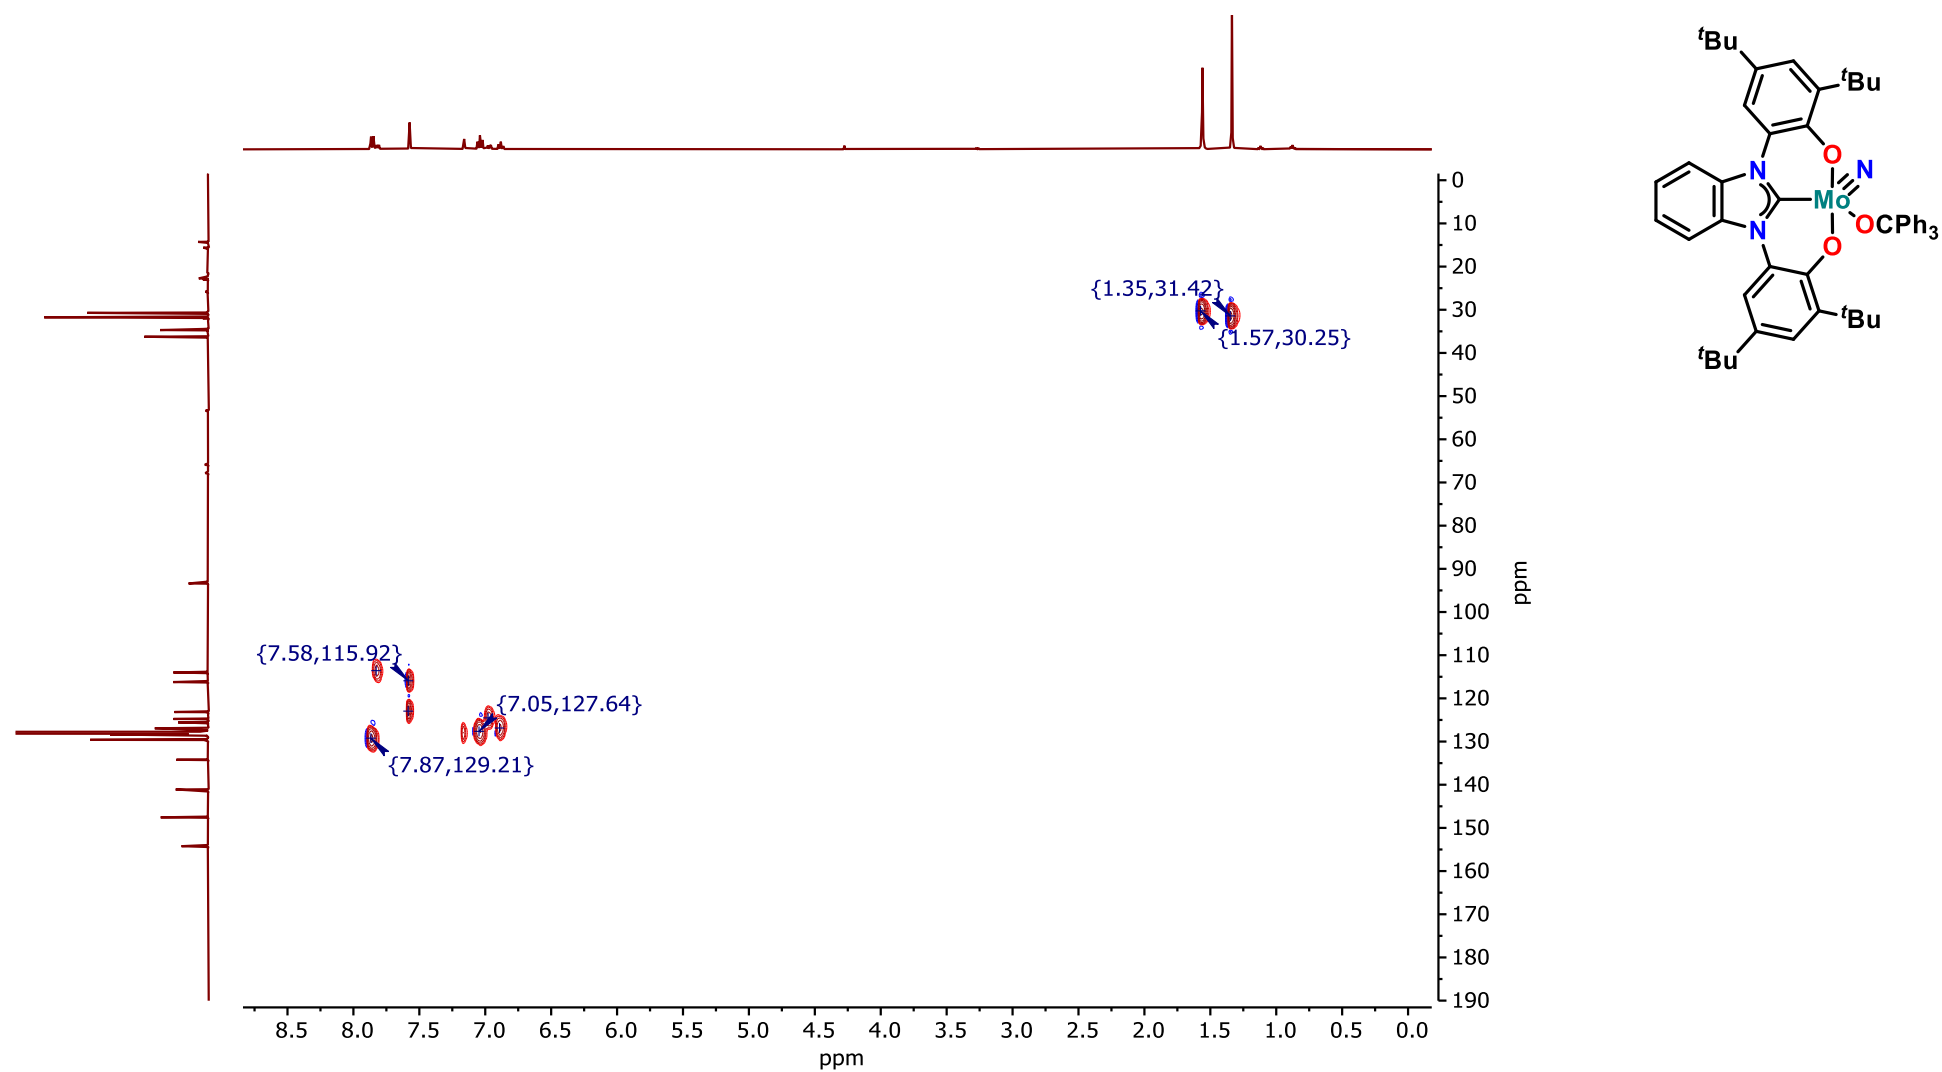

Figure S 54:  $^1\text{H}$  -  $^{13}\text{C}$  HSQC of **2-OCPh<sub>3</sub>** in  $\text{C}_6\text{D}_6$  at 298 K.

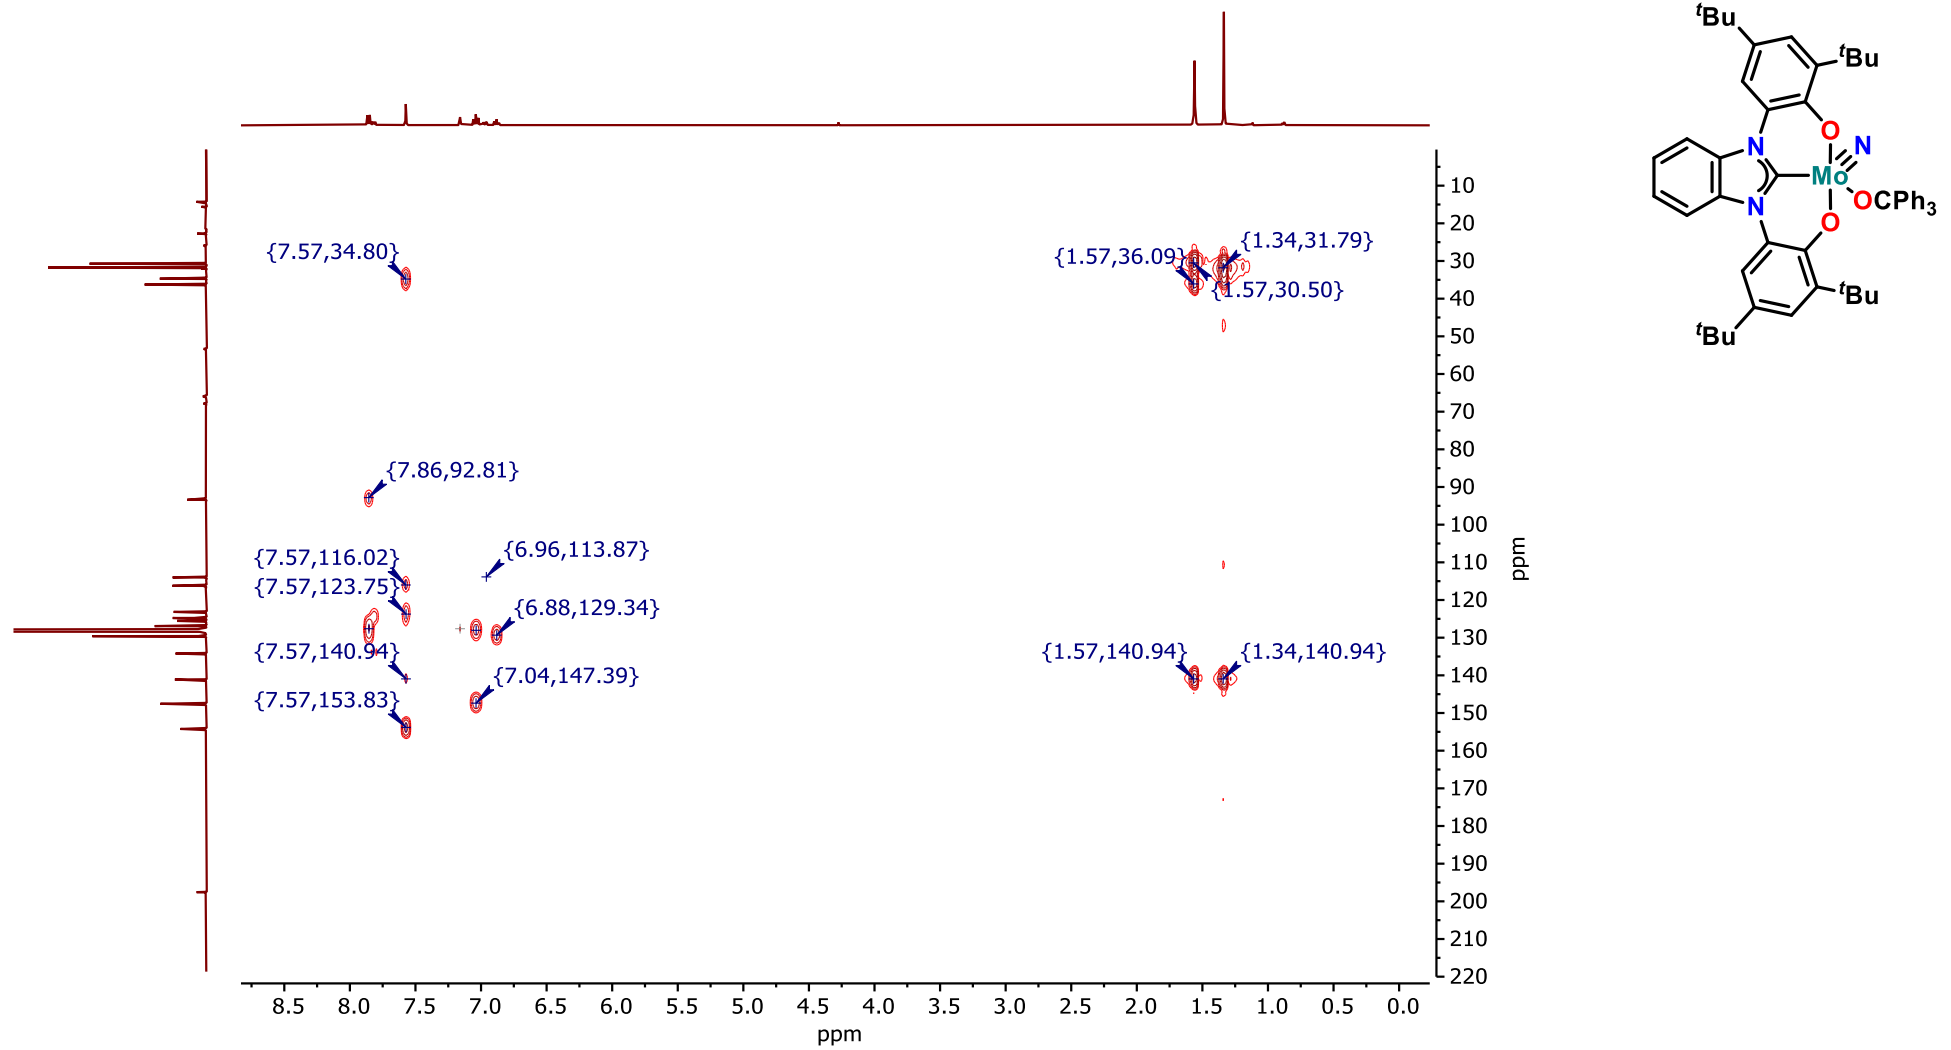

Figure S 55:  $^1\text{H}$  -  $^{13}\text{C}$  HMBC of **2-OCPh<sub>3</sub>** in  $\text{C}_6\text{D}_6$  at 298 K.

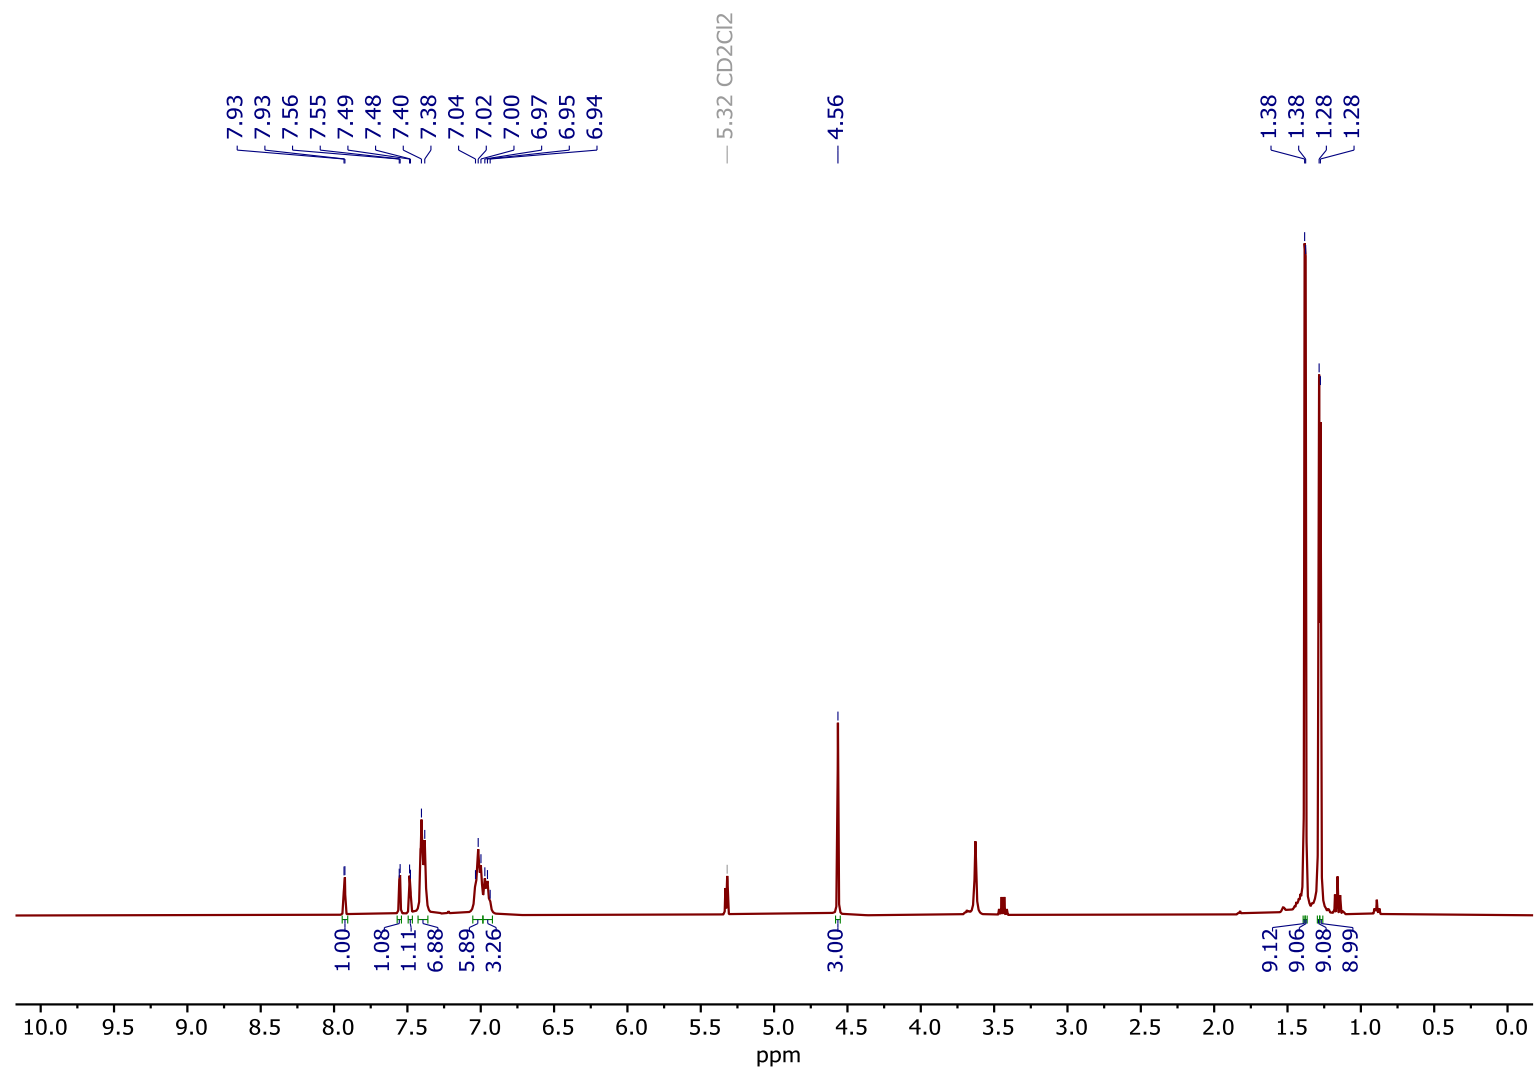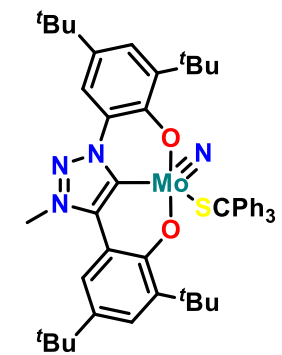

Figure S 56:  $^1\text{H}$  NMR of **1-SCPh<sub>3</sub>** in  $\text{CD}_2\text{Cl}_2$  at 298 K.

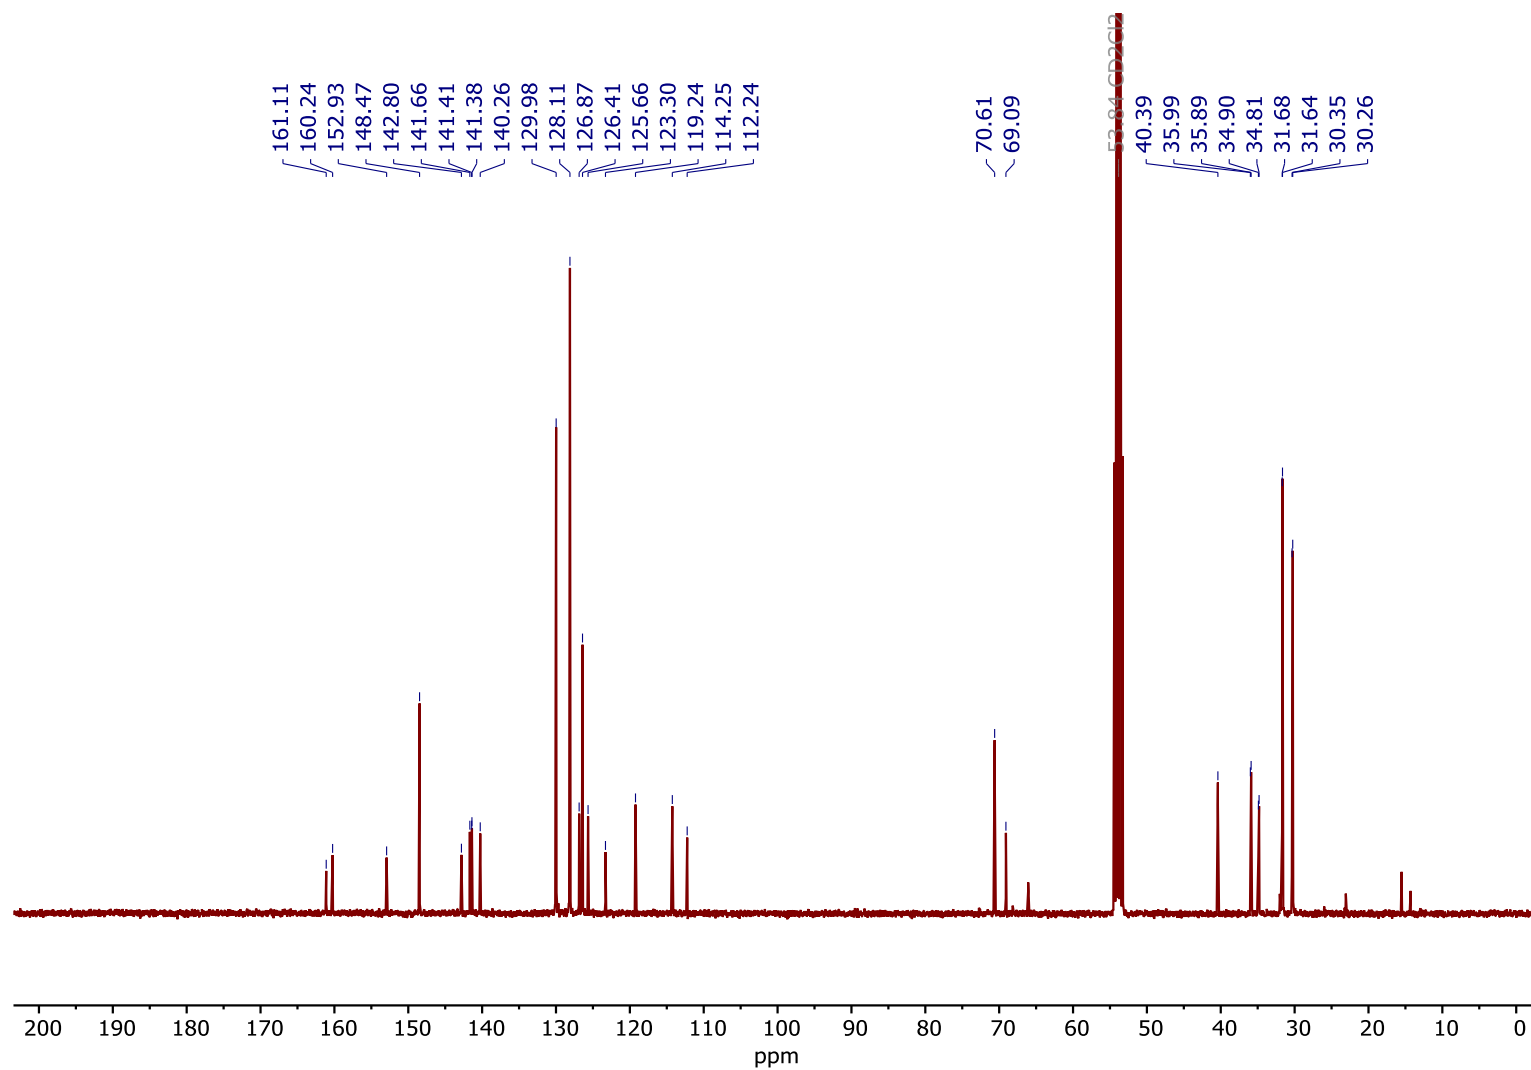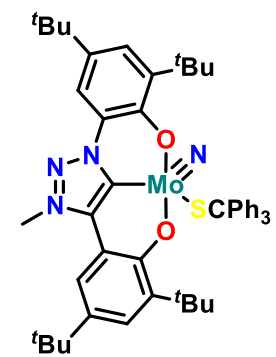

Figure S 57:  $^{13}\text{C}$  NMR of **1-SCPh<sub>3</sub>** in  $\text{CD}_2\text{Cl}_2$  at 298 K.

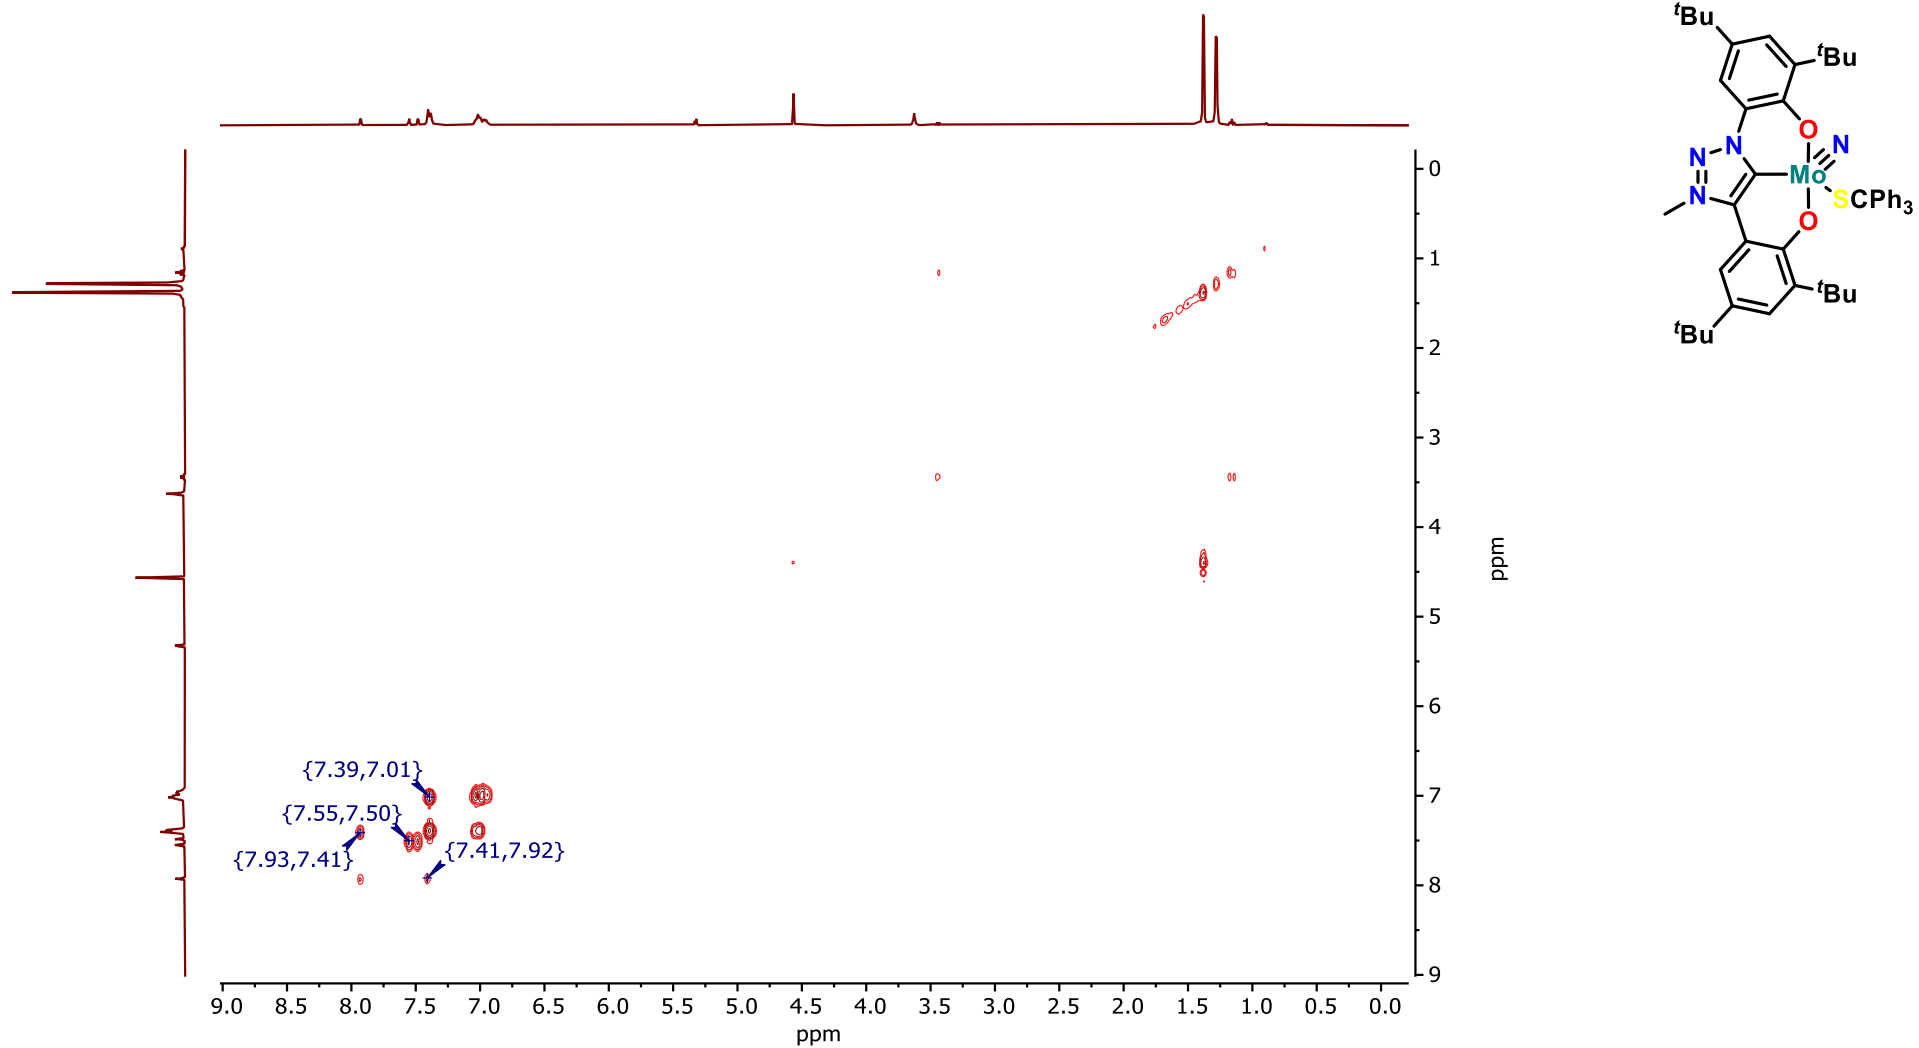

Figure S 58:  $^1\text{H} - ^1\text{H}$  COSY of **1-SCPh<sub>3</sub>** in  $\text{CD}_2\text{Cl}_2$  at 298 K.

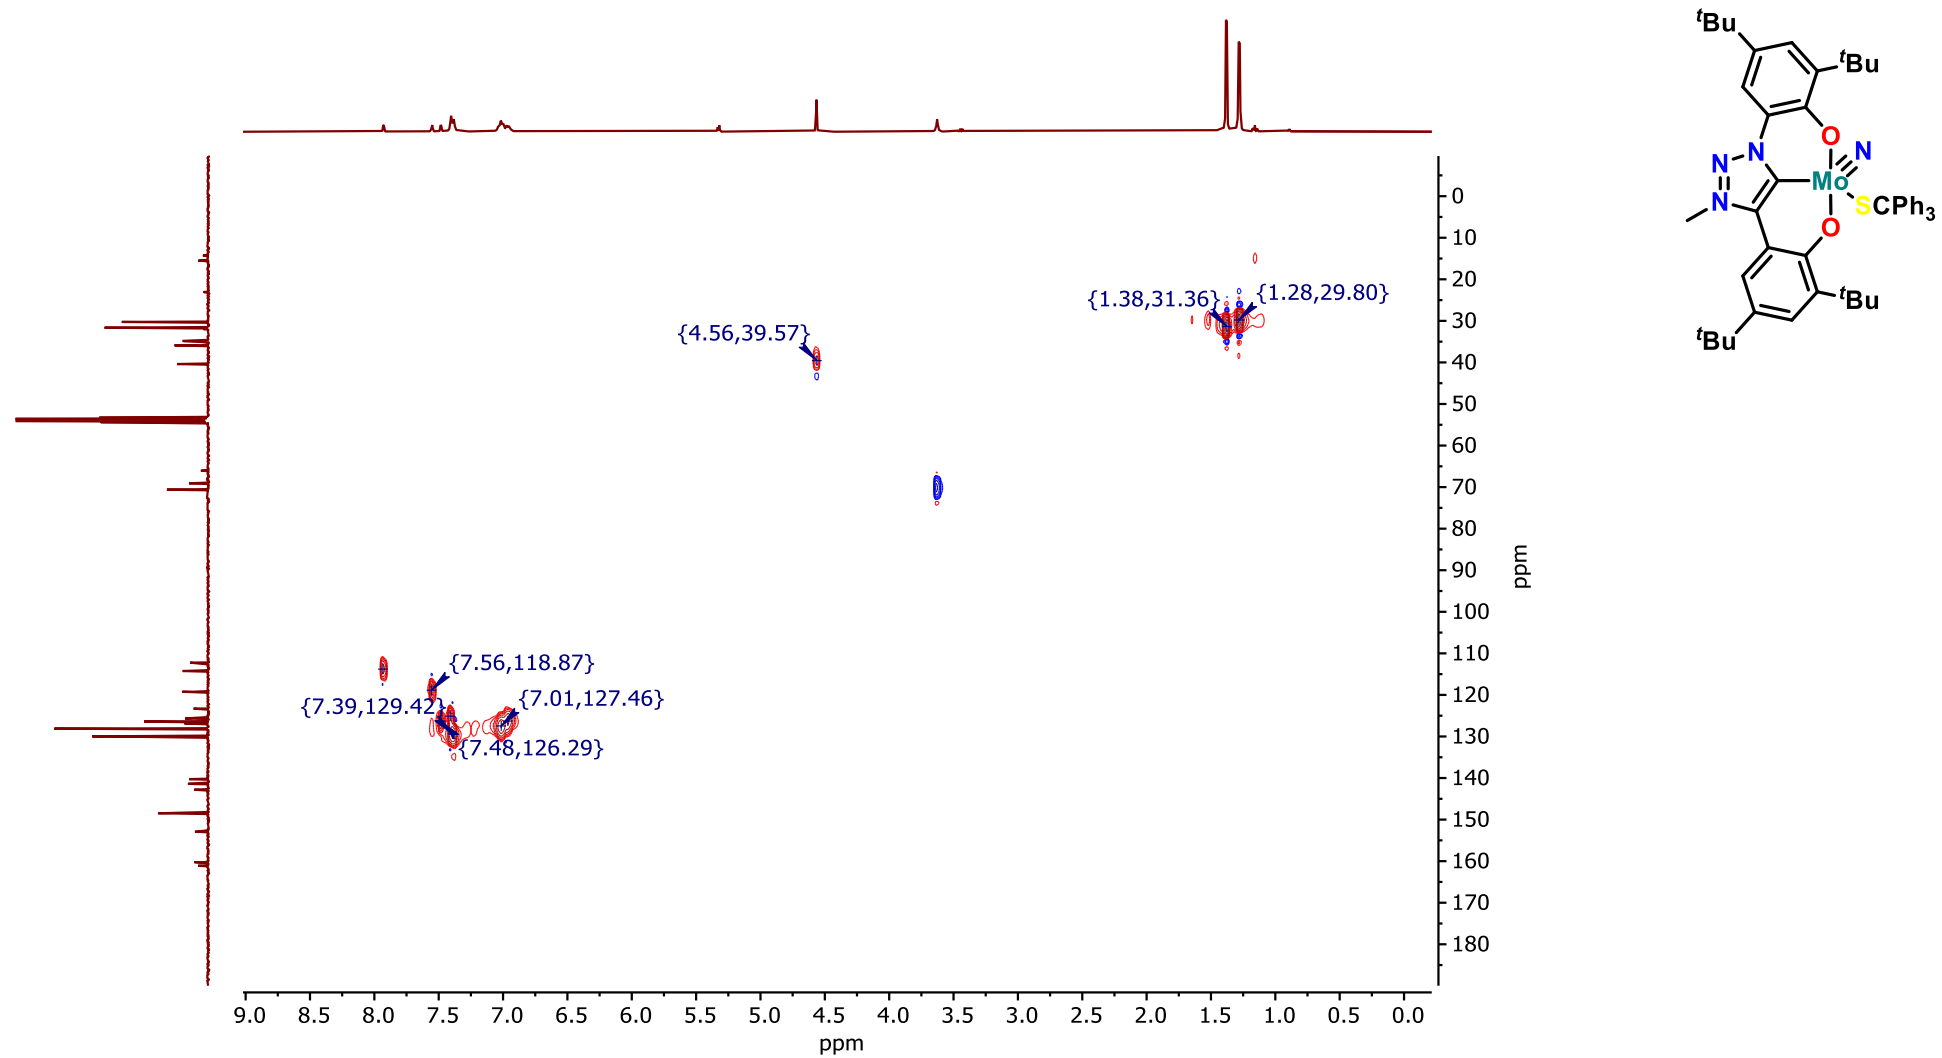

Figure S 59:  $^1\text{H} - ^{13}\text{C}$  HSQC of **1-SCPh<sub>3</sub>** in  $\text{CD}_2\text{Cl}_2$  at 298 K.



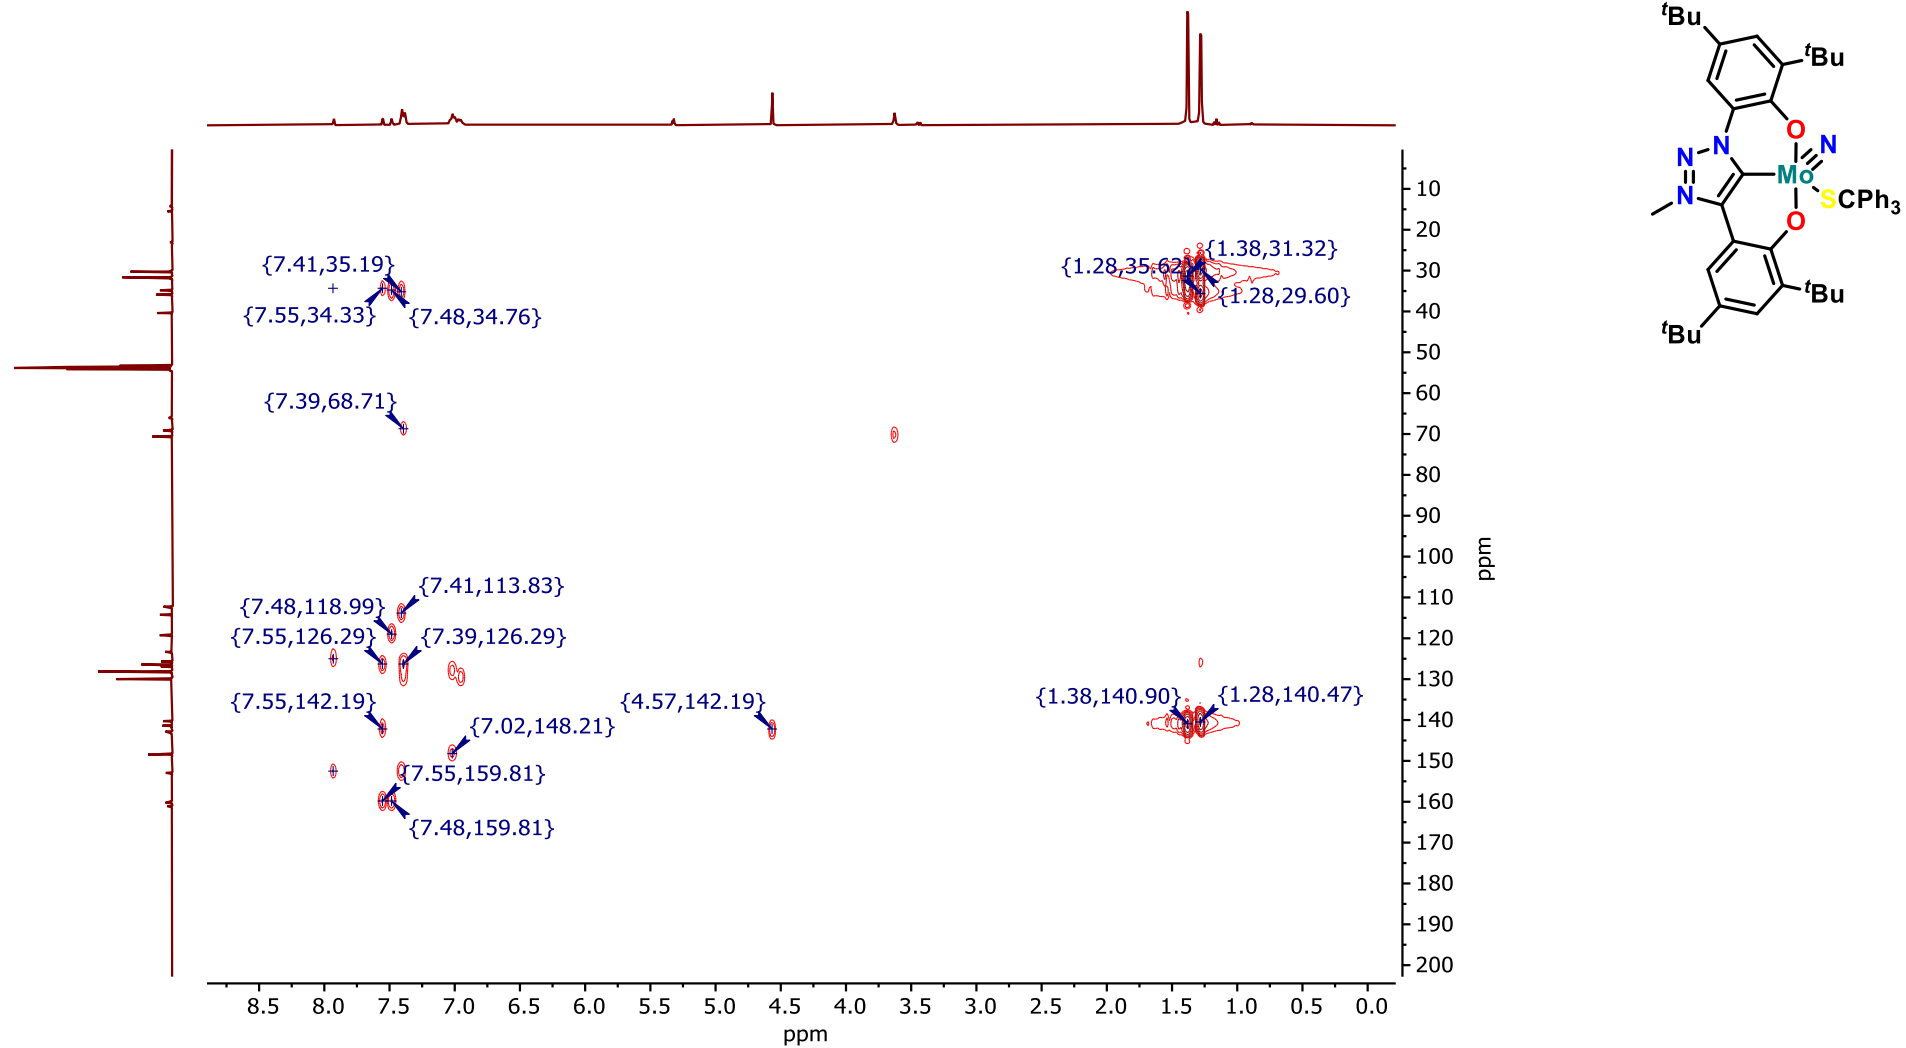

Figure S 60:  $^1\text{H}$  -  $^{13}\text{C}$  HMBC of **1-SCPh<sub>3</sub>** in  $\text{CD}_2\text{Cl}_2$  at 298 K.

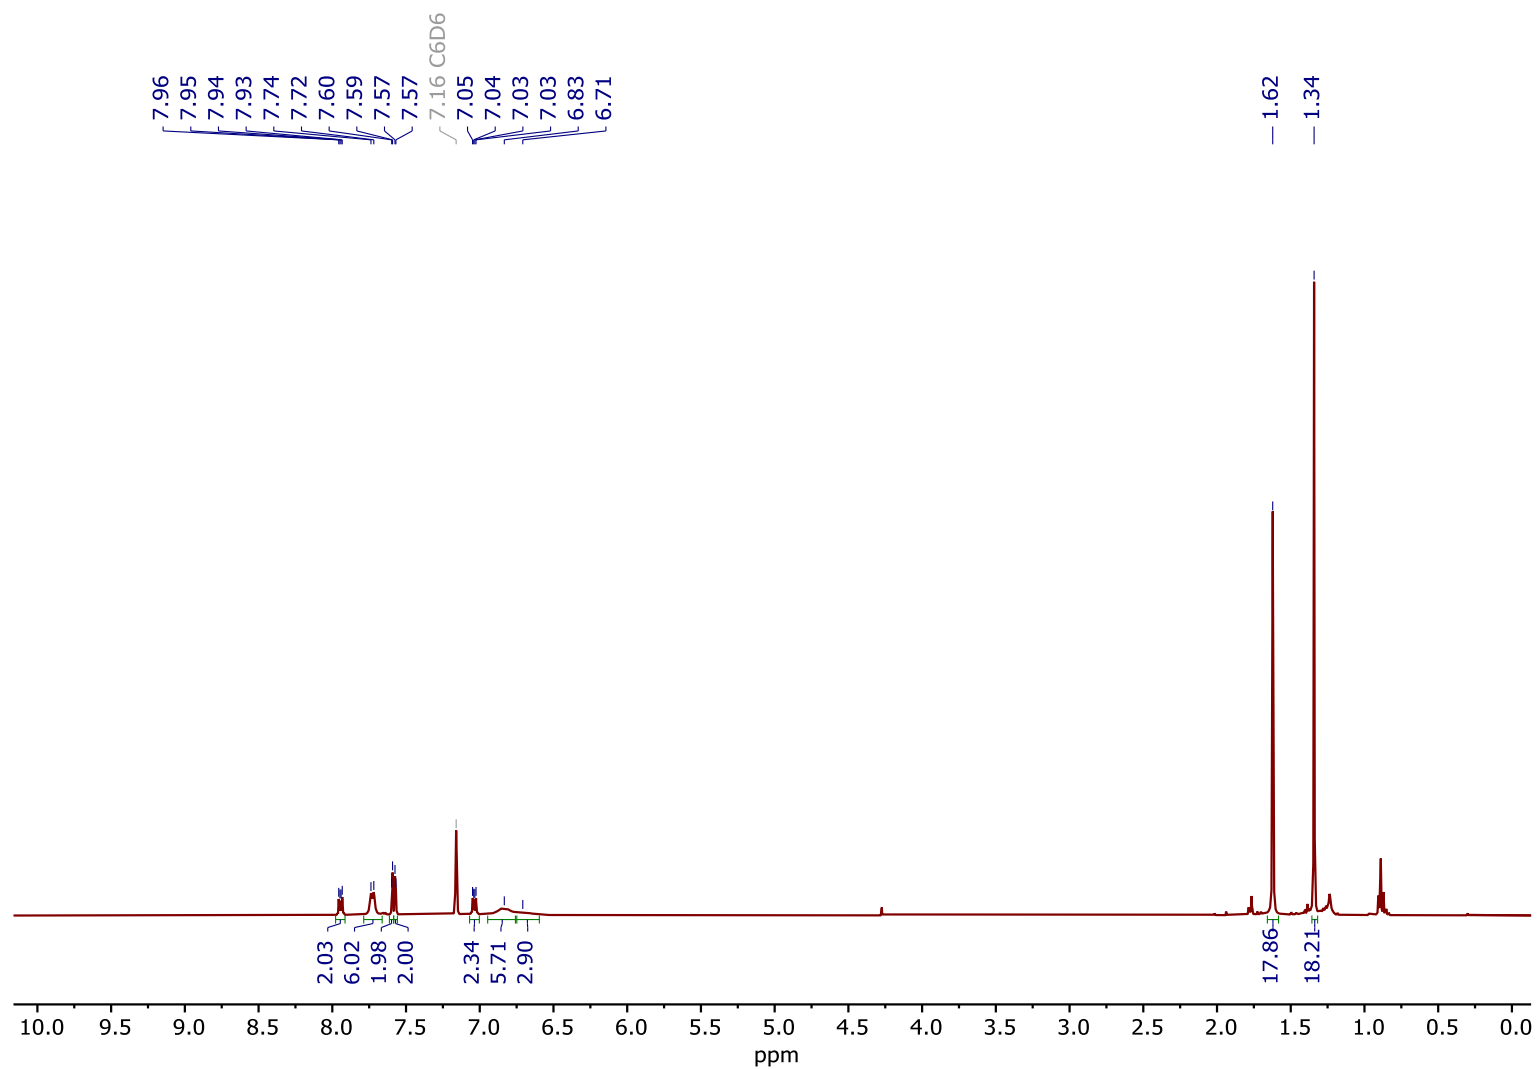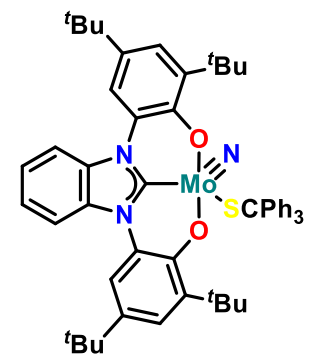

Figure S 61:  $^1\text{H}$  NMR of **2-SCPh<sub>3</sub>** in  $\text{C}_6\text{D}_6$  at 298 K.

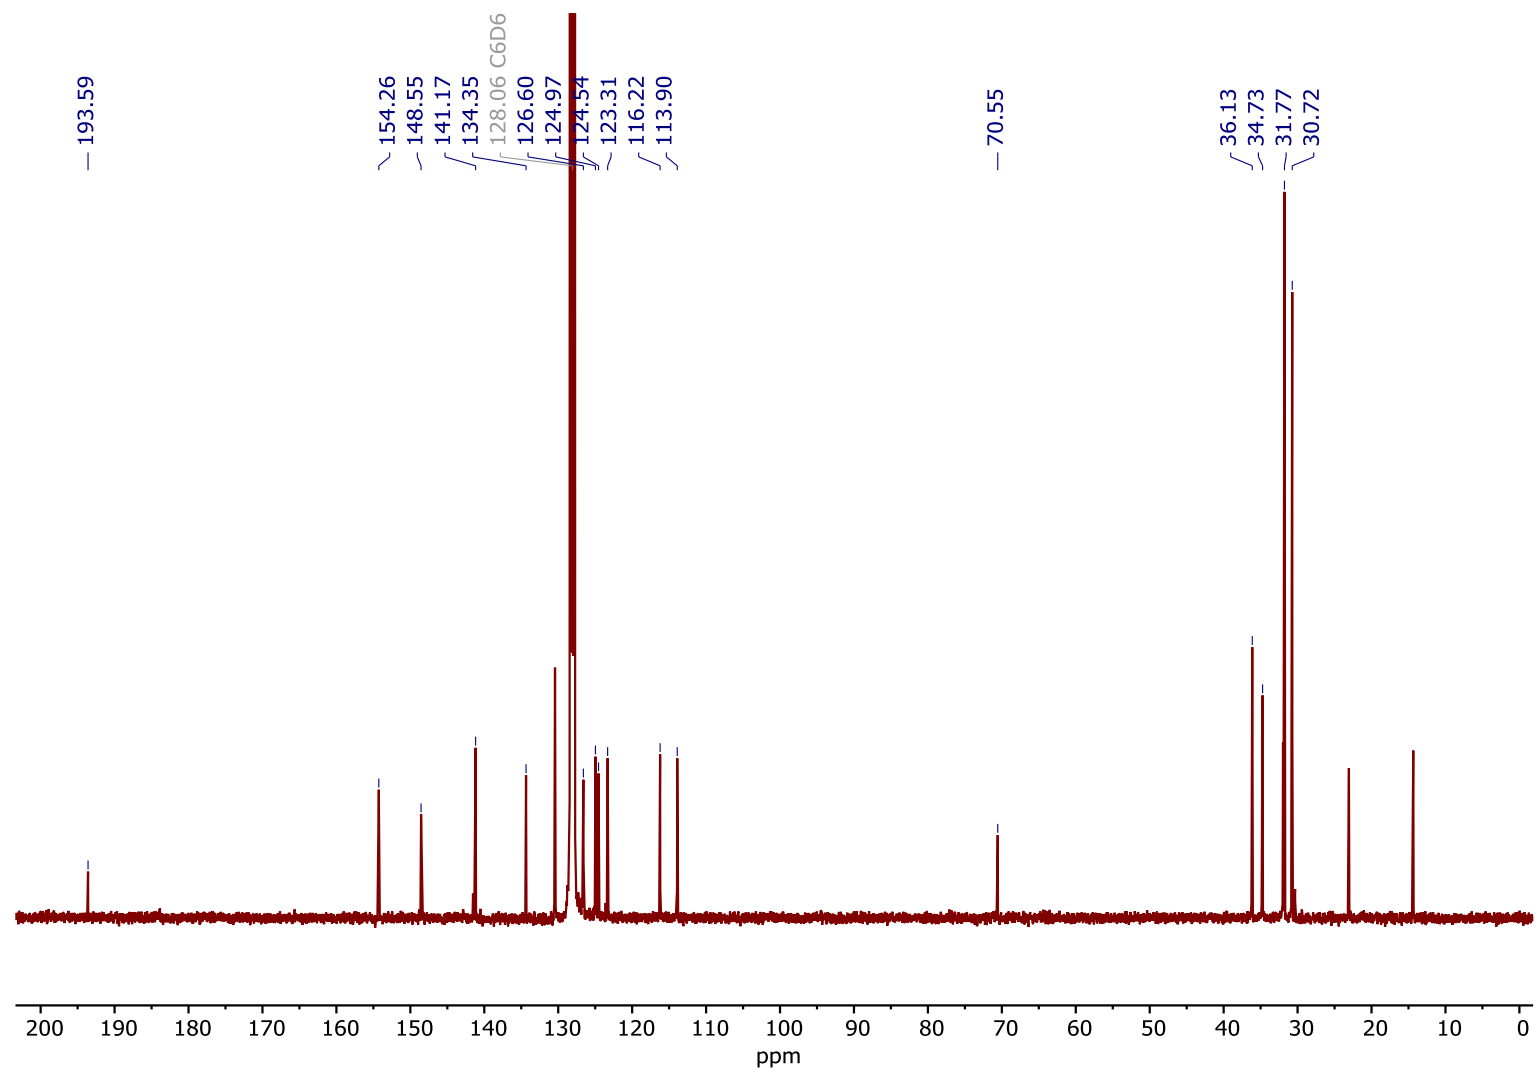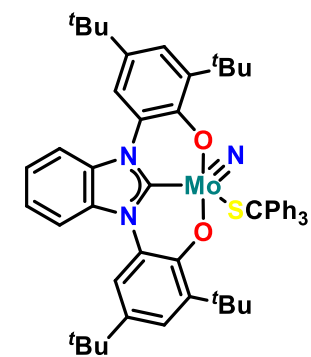

Figure S 62:  $^{13}\text{C}$  NMR of **2-SCPh<sub>3</sub>** in  $\text{C}_6\text{D}_6$  at 298 K.

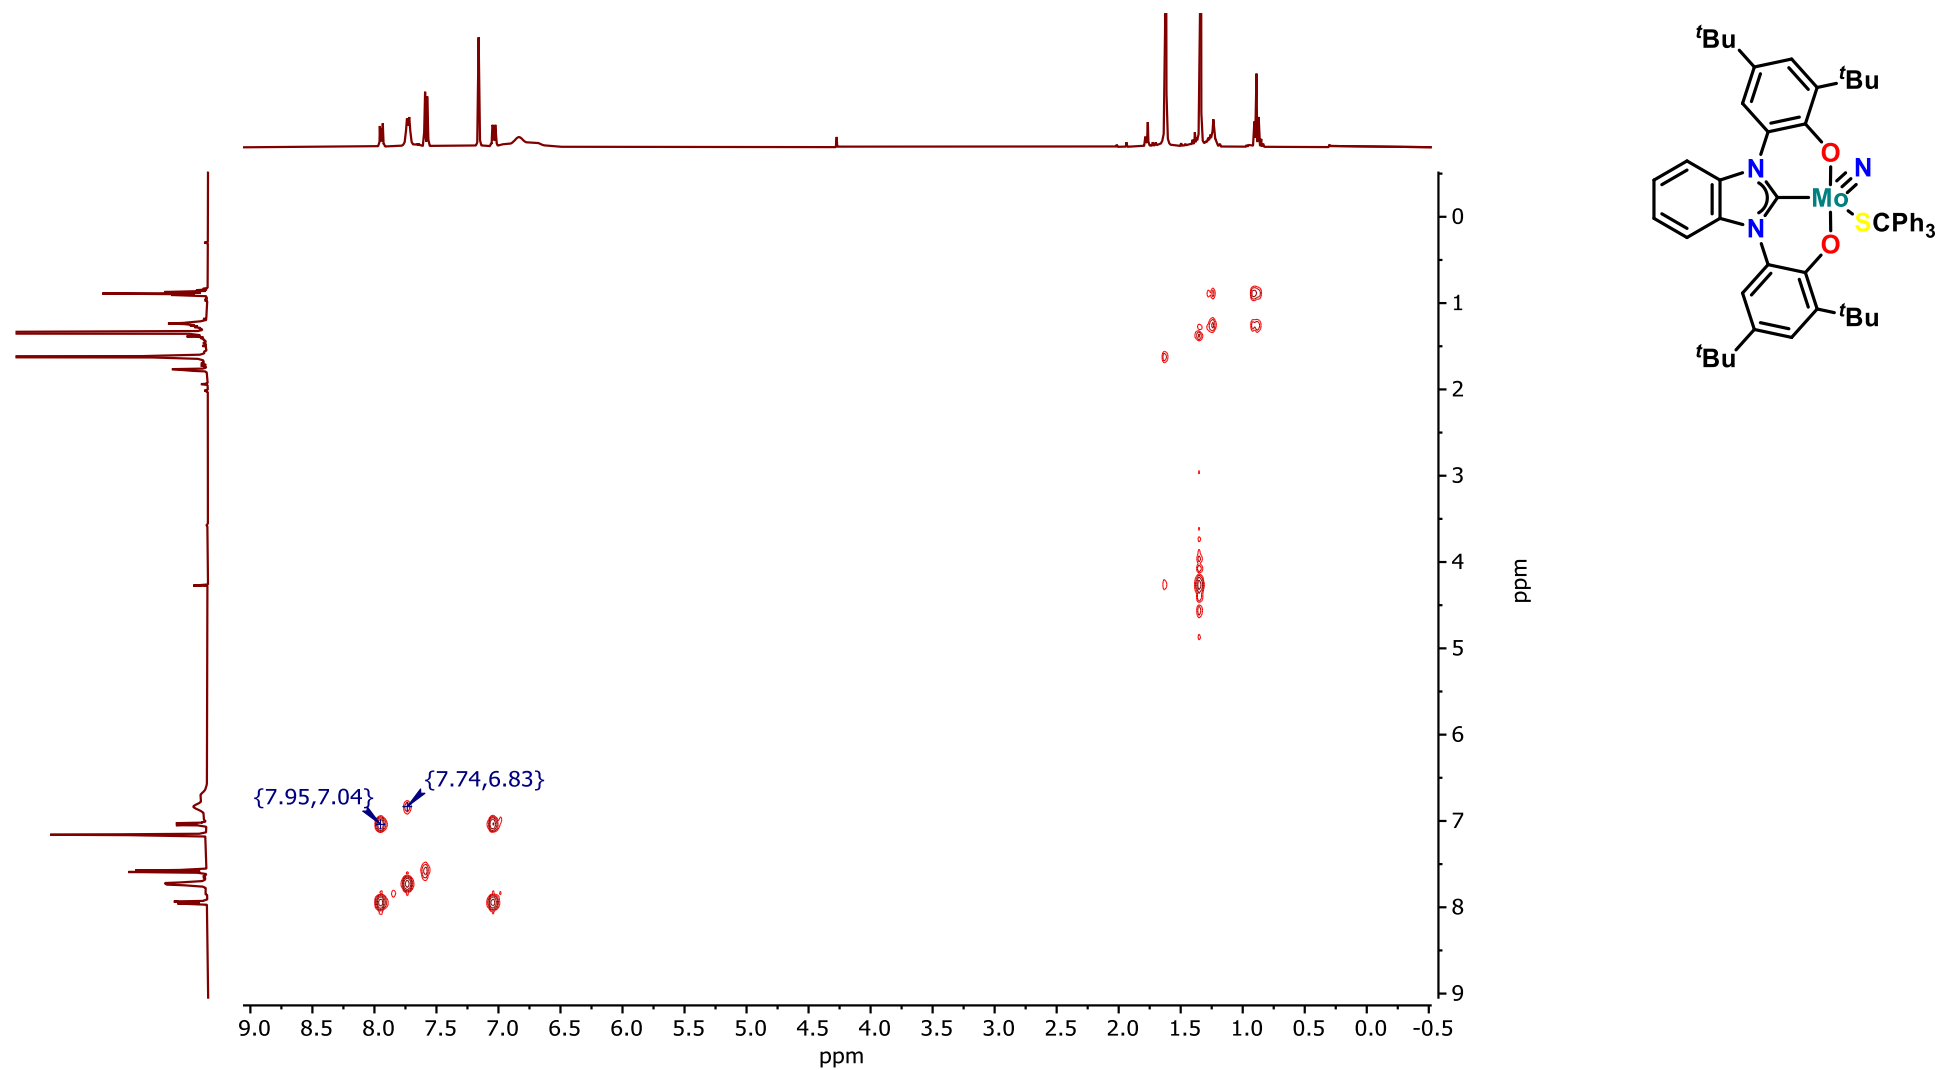

Figure S 63:  $^1\text{H}$  -  $^1\text{H}$  COSY of **2-SCPh<sub>3</sub>** in  $\text{C}_6\text{D}_6$  at 298 K.

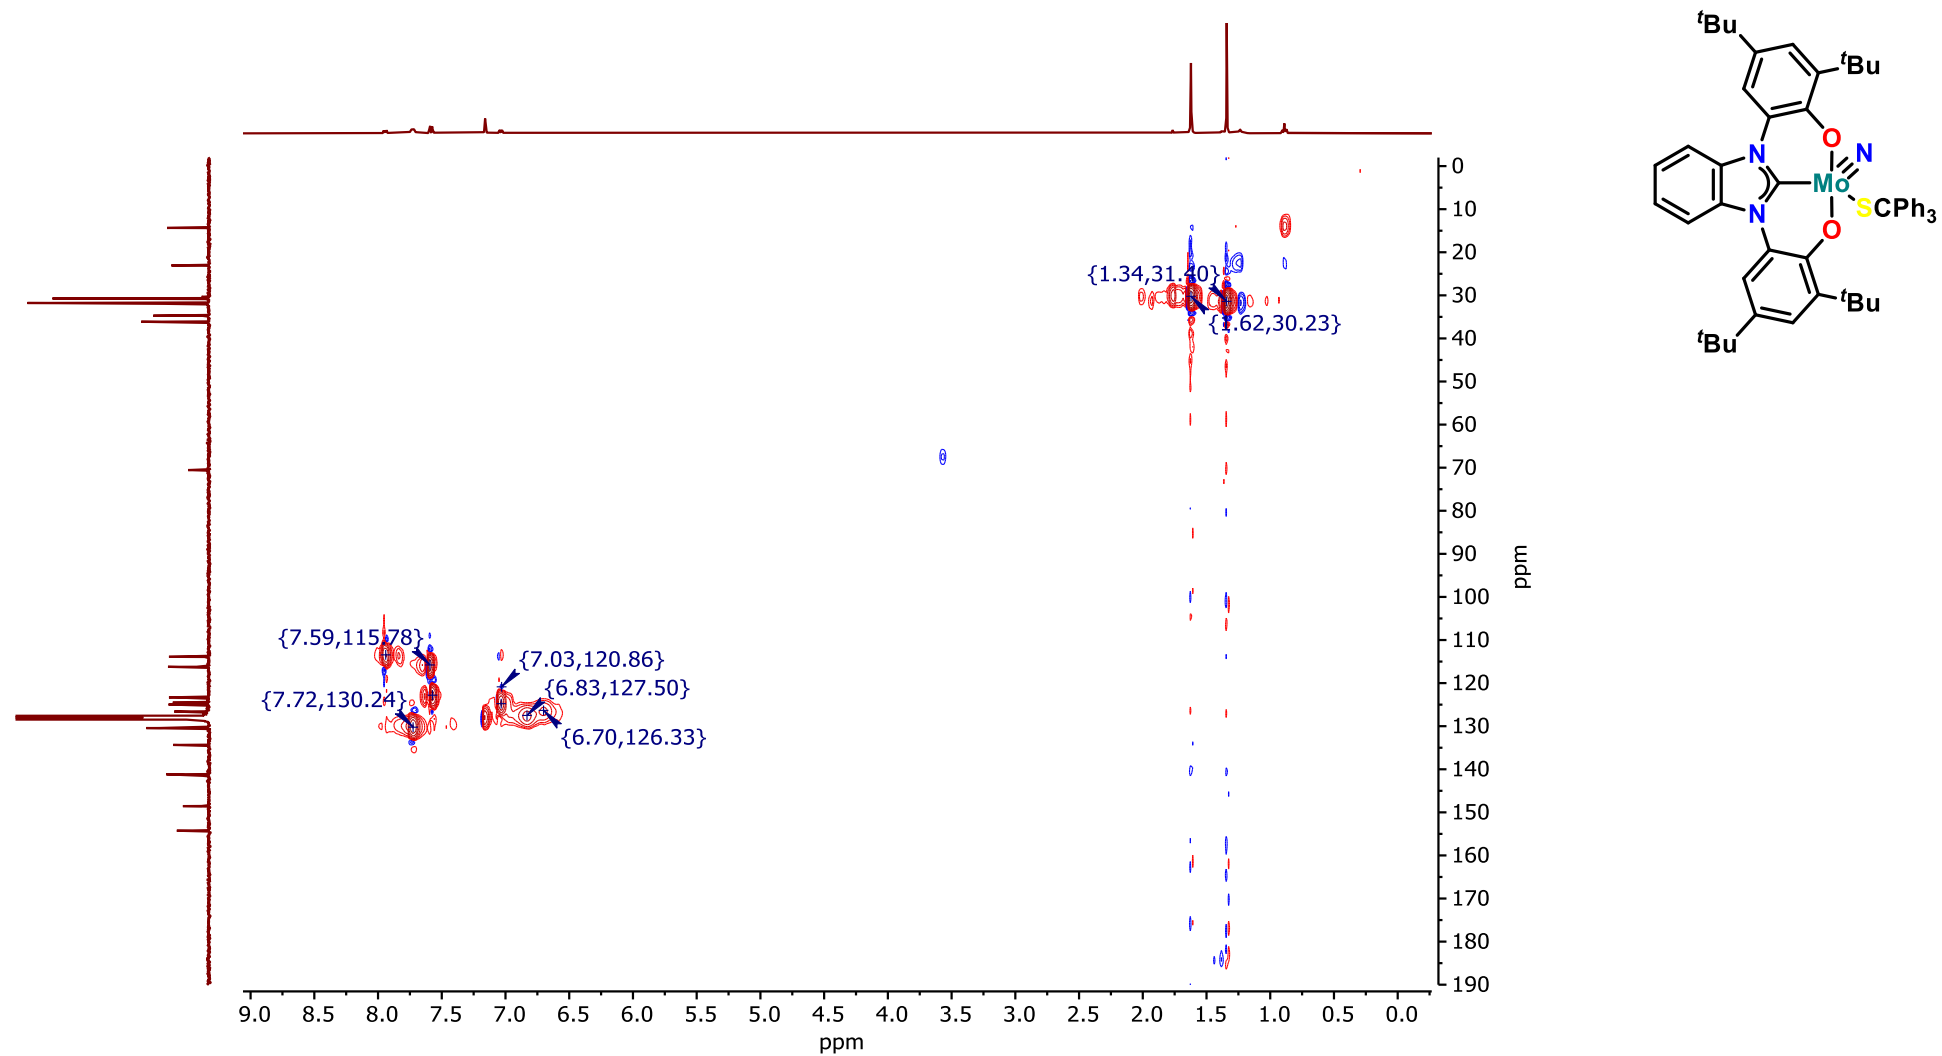

Figure S 64:  $^1\text{H}$  -  $^{13}\text{C}$  HSQC of **2-SCPh<sub>3</sub>** in  $\text{C}_6\text{D}_6$  at 298 K.

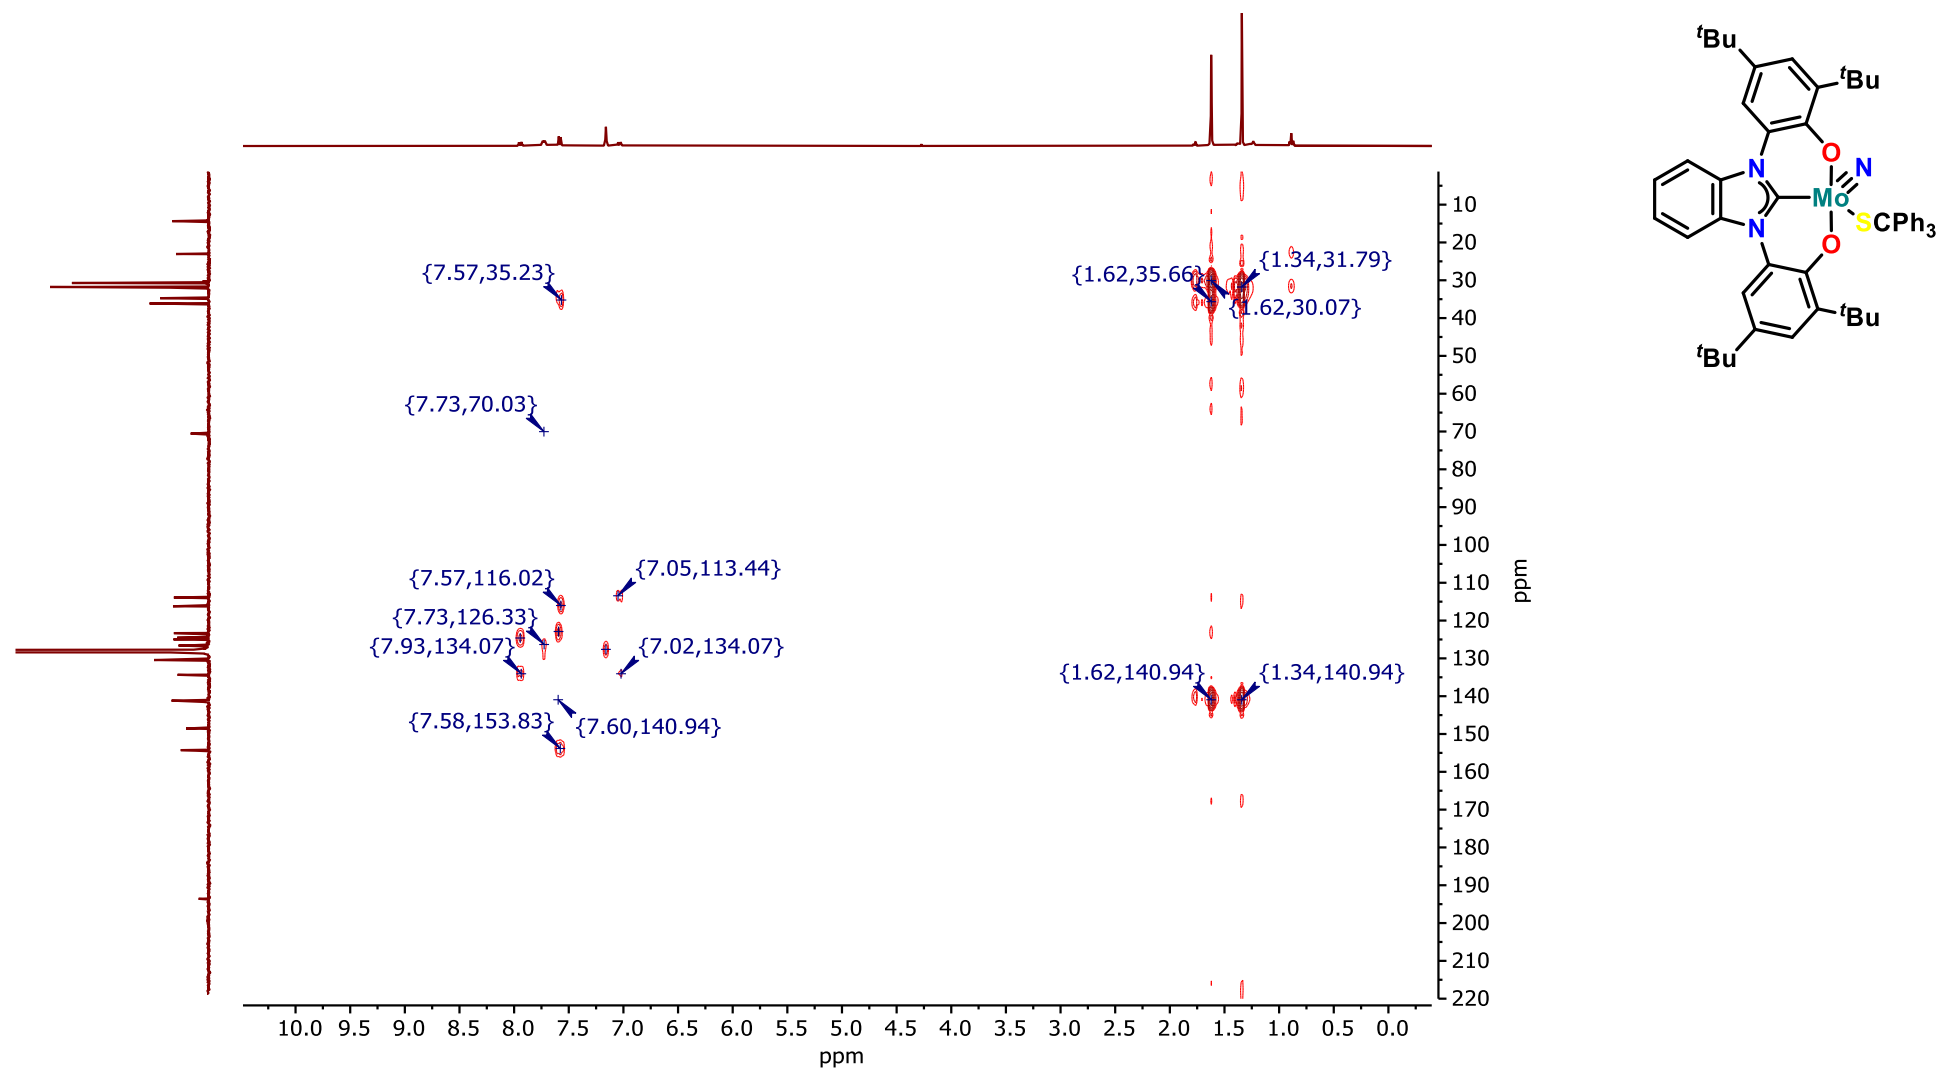

Figure S 65:  $^1\text{H}$  -  $^{13}\text{C}$  HMBC of **2-SCPh<sub>3</sub>** in  $\text{C}_6\text{D}_6$  at 298 K.

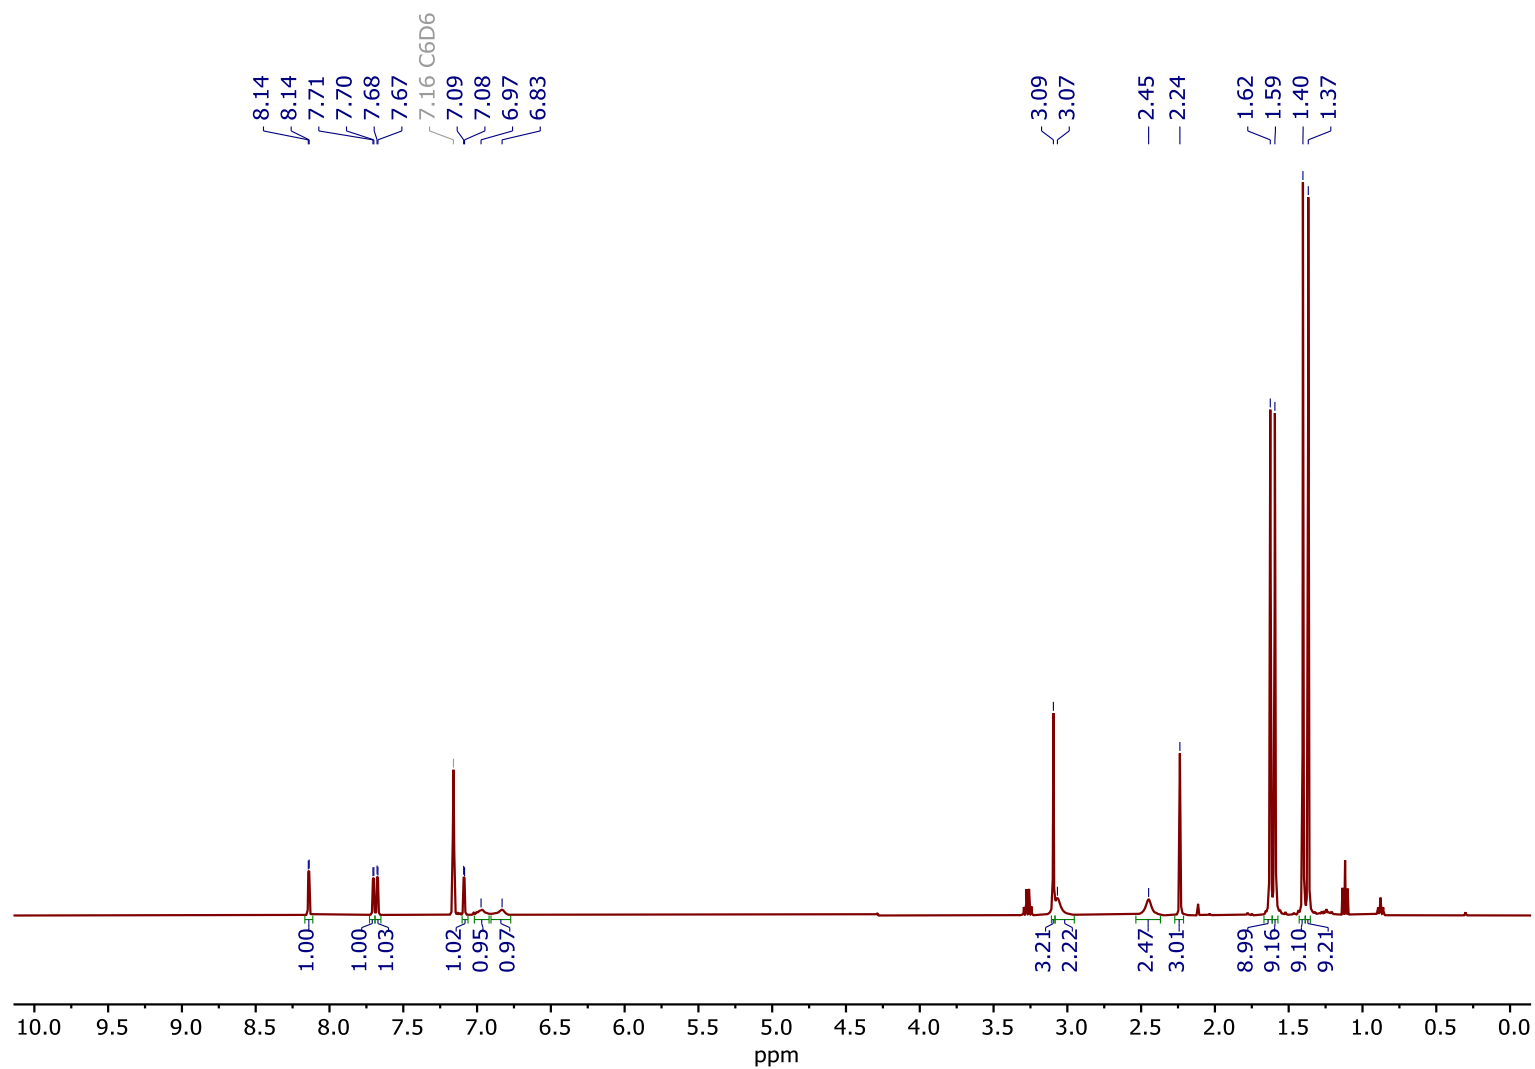

Figure S 66:  $^1\text{H}$  NMR of **1-OMes** in  $\text{C}_6\text{D}_6$  at 298 K.

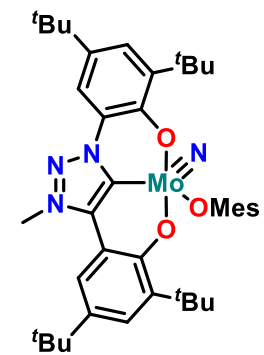

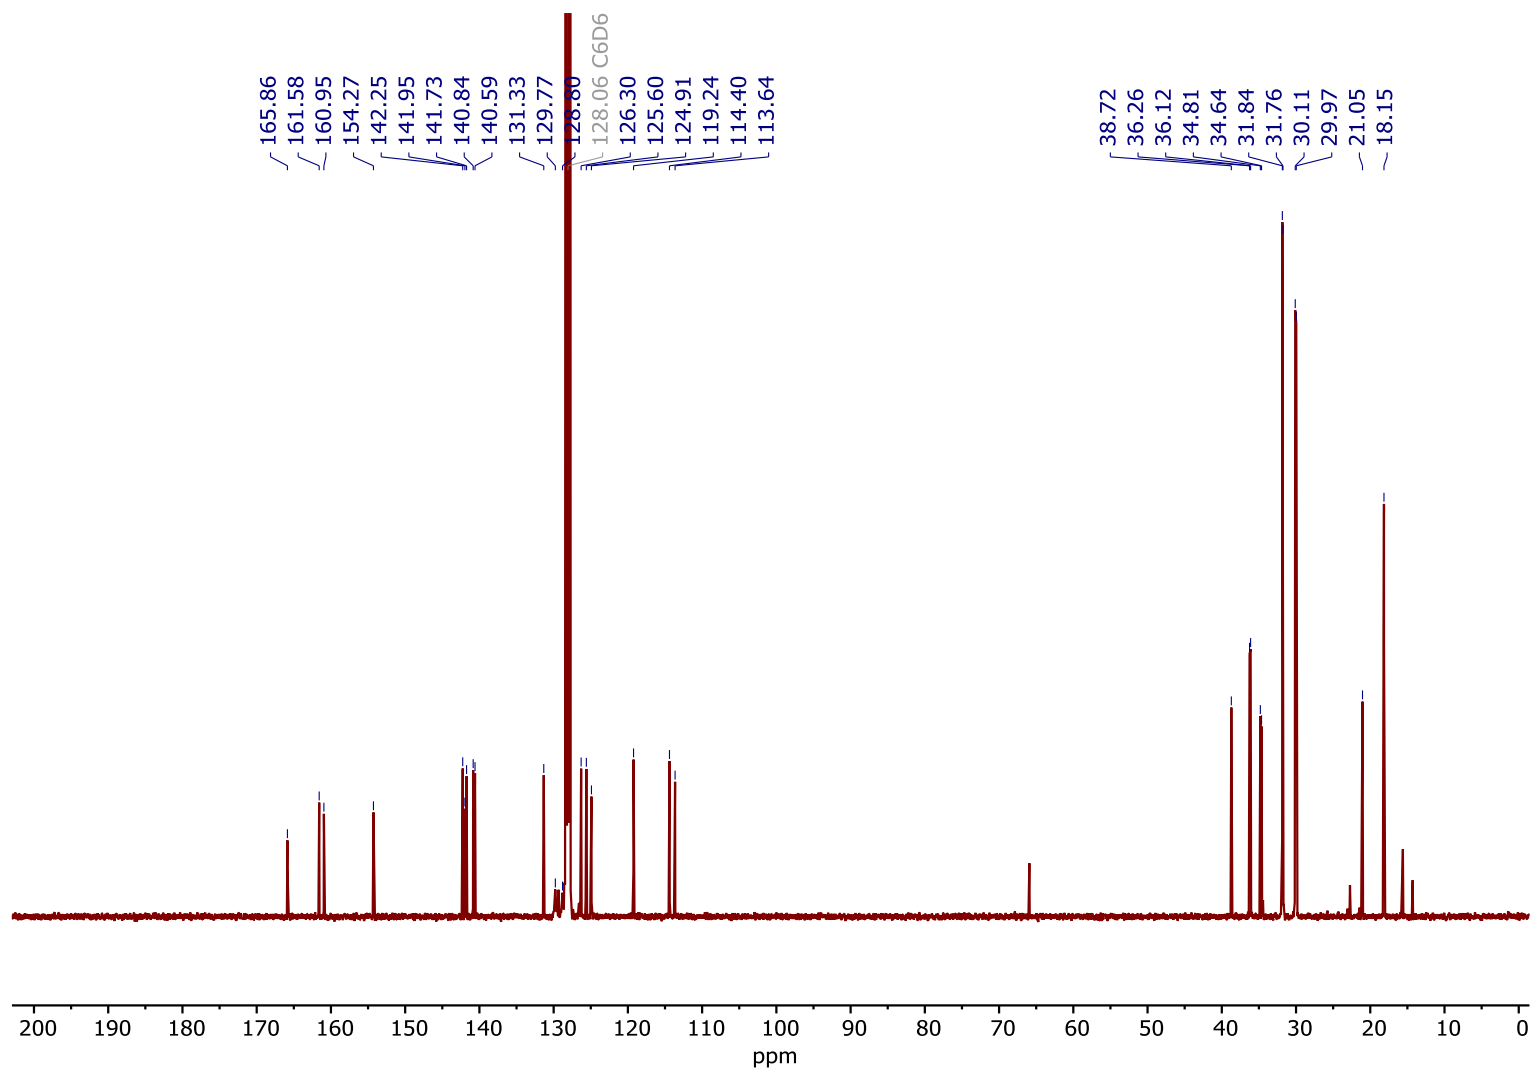

Figure S 67:  $^{13}\text{C}$  NMR of **1-OMes** in  $\text{C}_6\text{D}_6$  at 298 K.

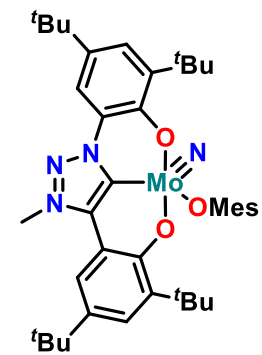



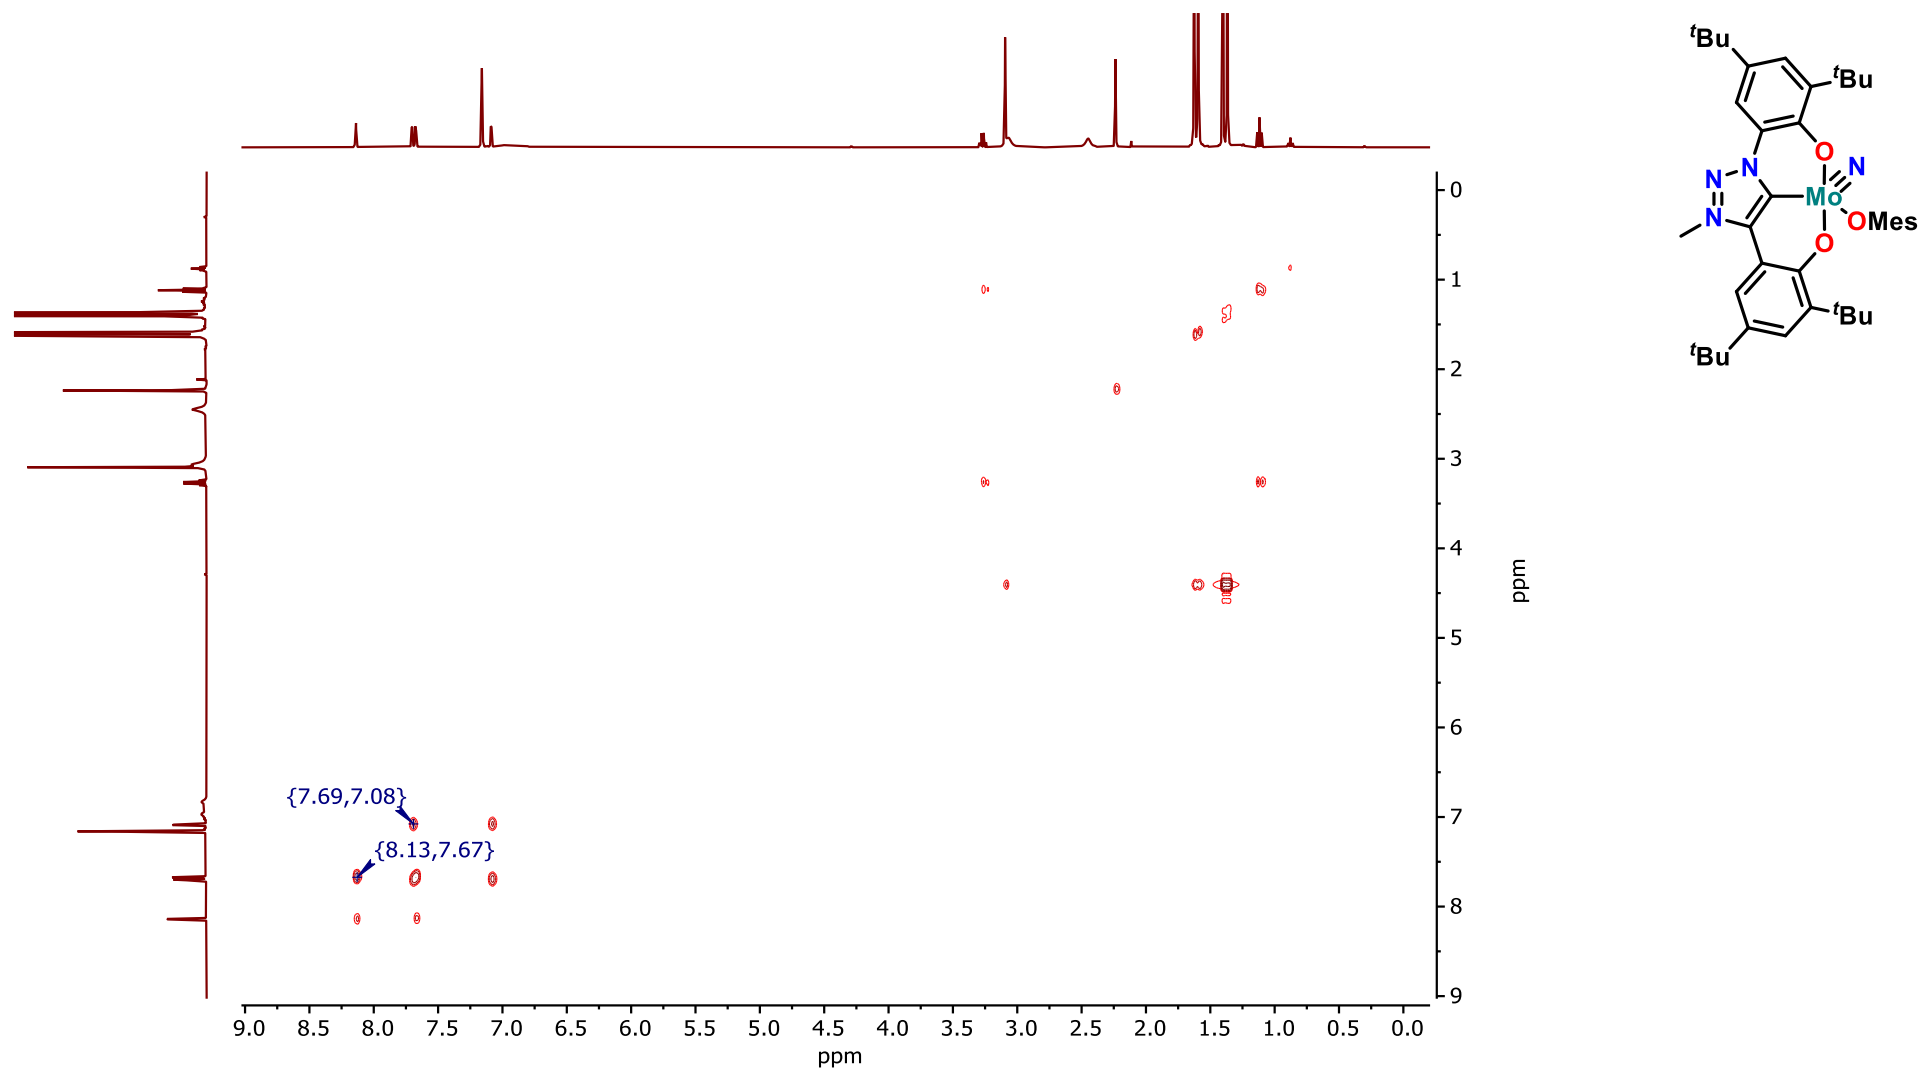

Figure S 68:  $^1\text{H}$  -  $^1\text{H}$  COSY of **1-OMes** in  $\text{C}_6\text{D}_6$  at 298 K.

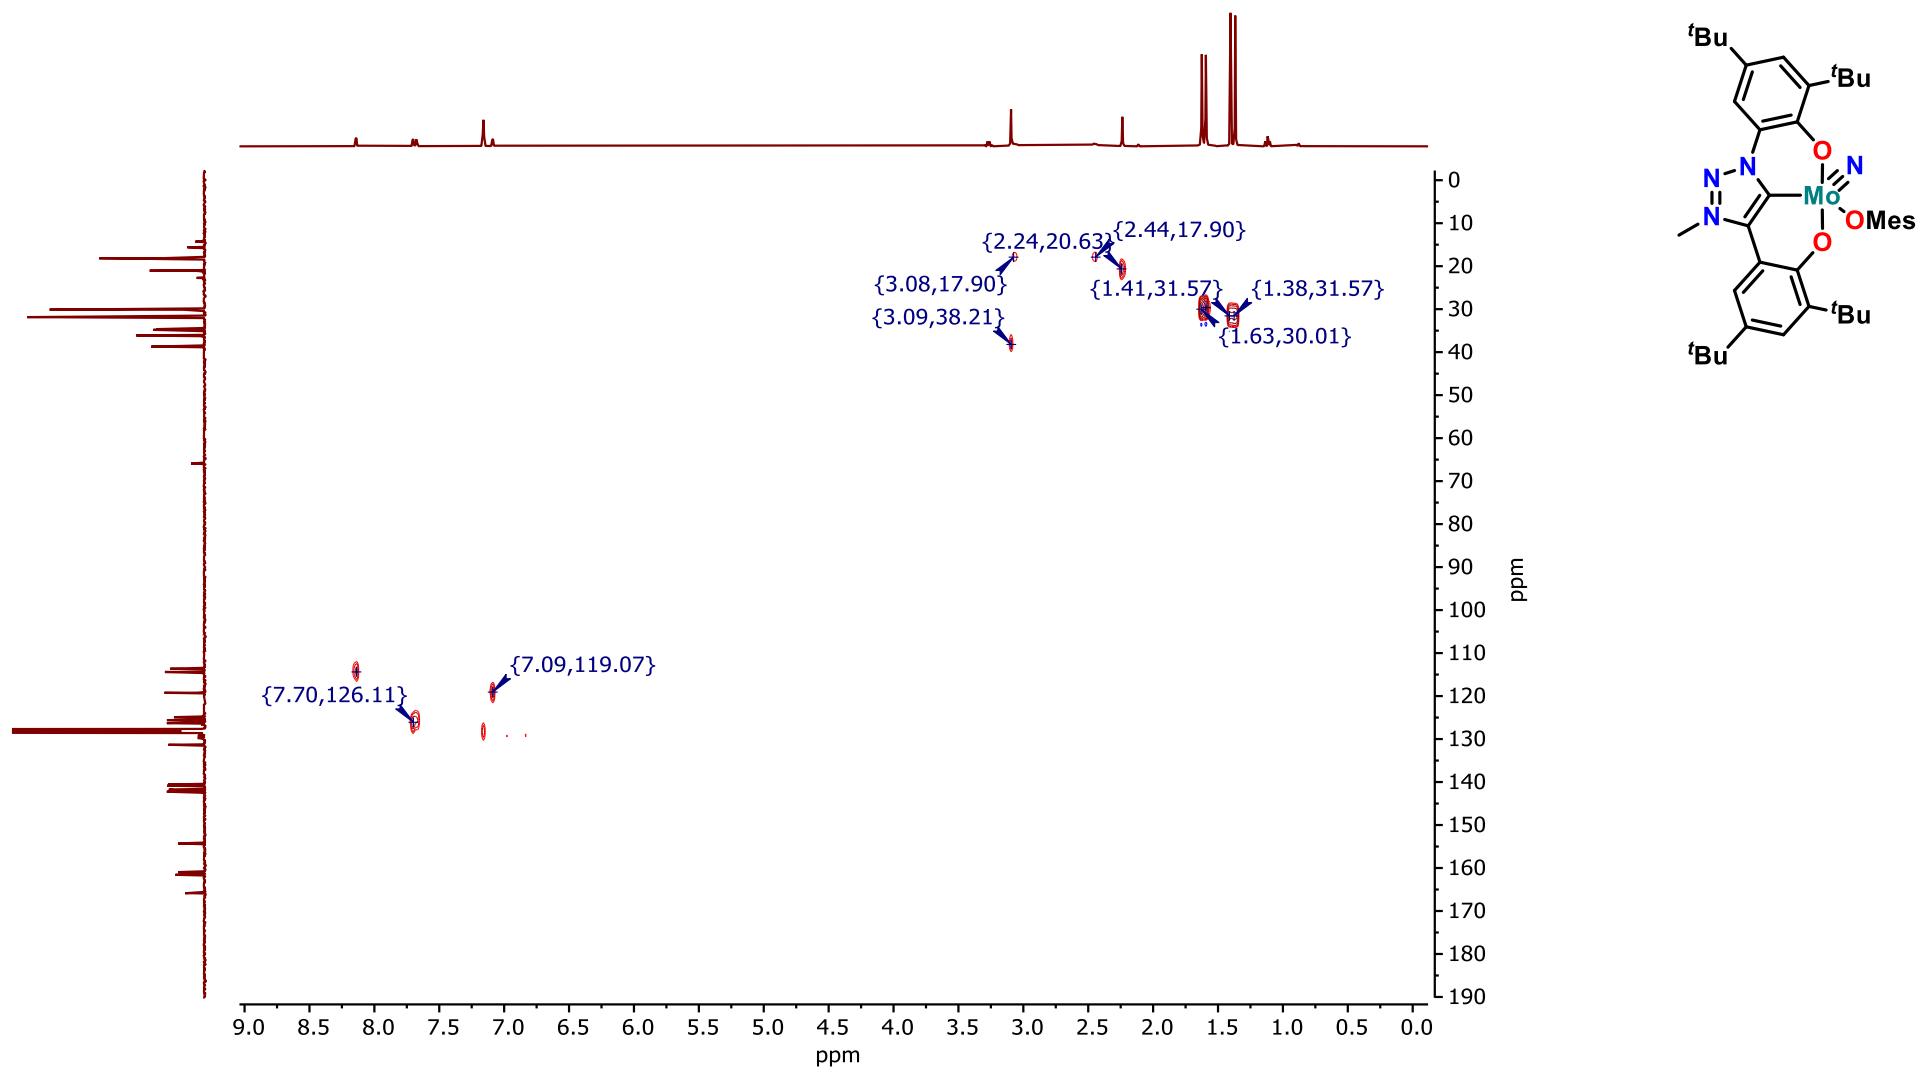

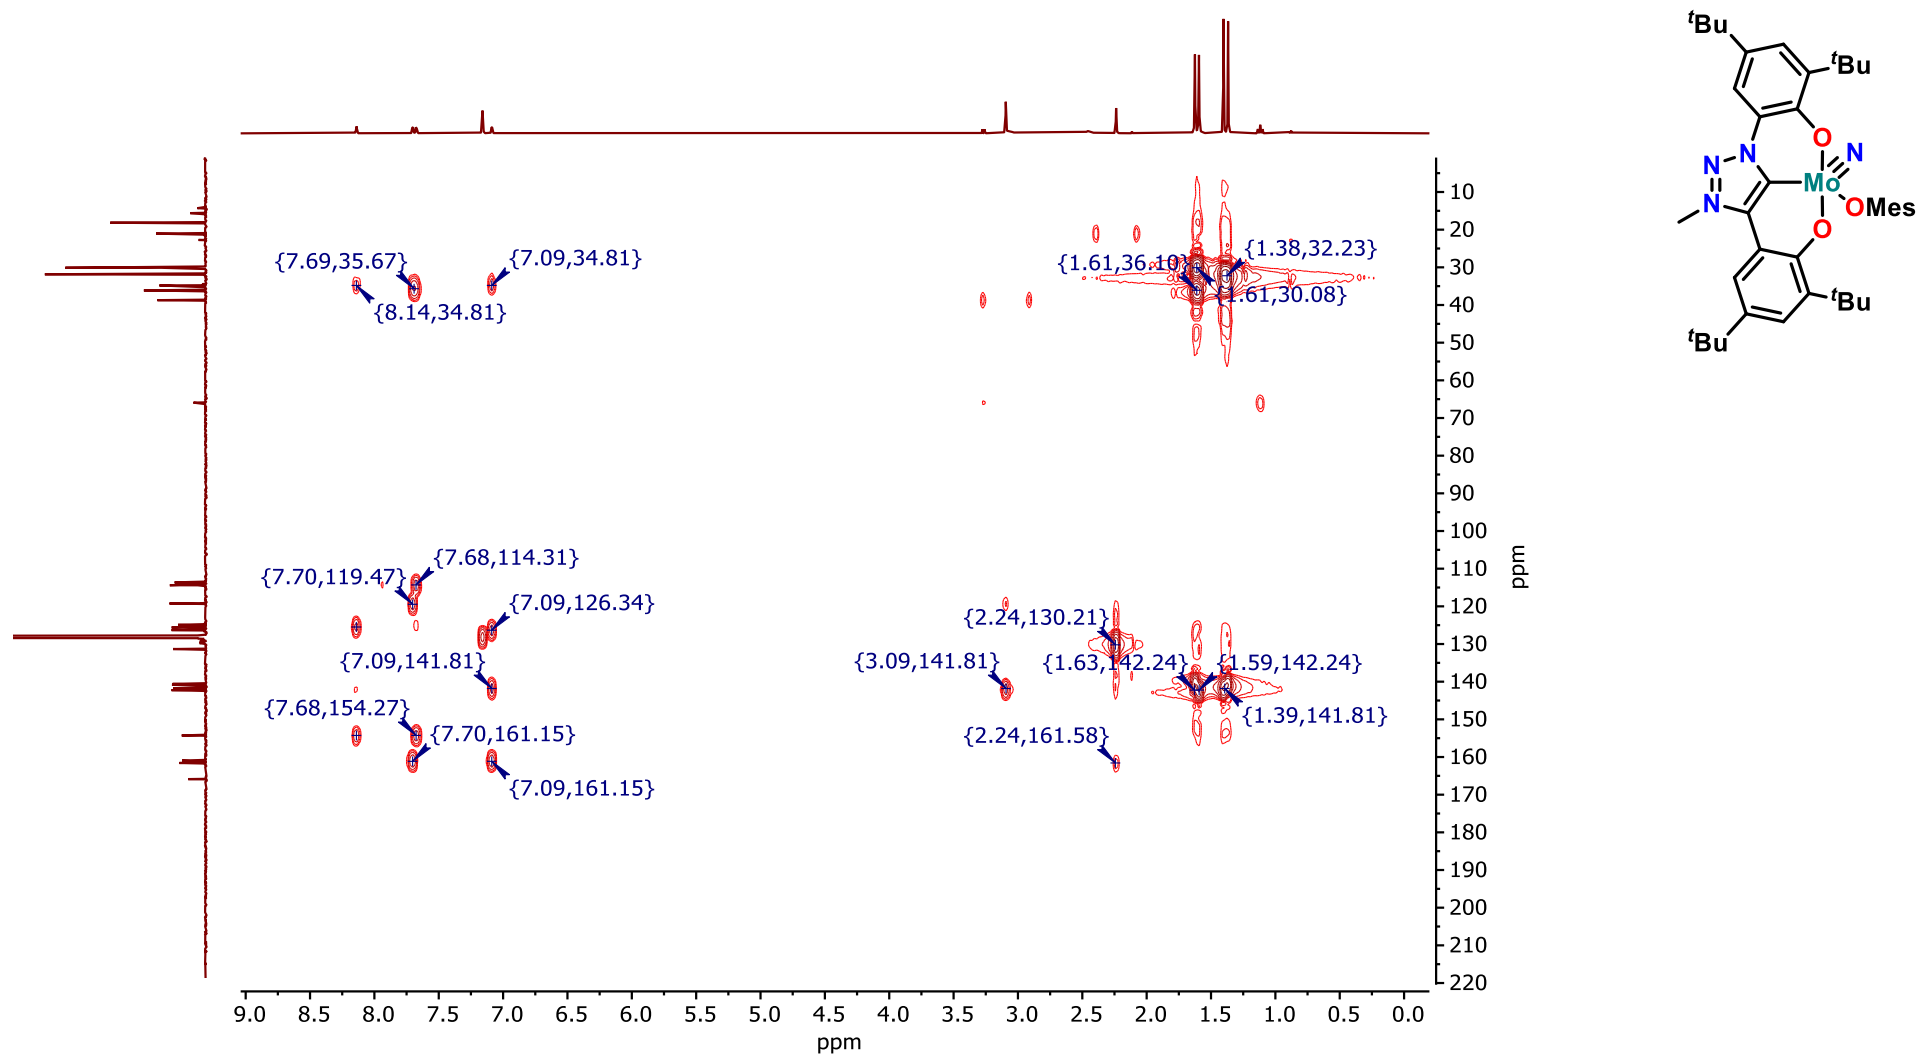

Figure S 70:  $^1\text{H} - ^{13}\text{C}$  HMBC of **1-OMes** in  $\text{C}_6\text{D}_6$  at 298 K.

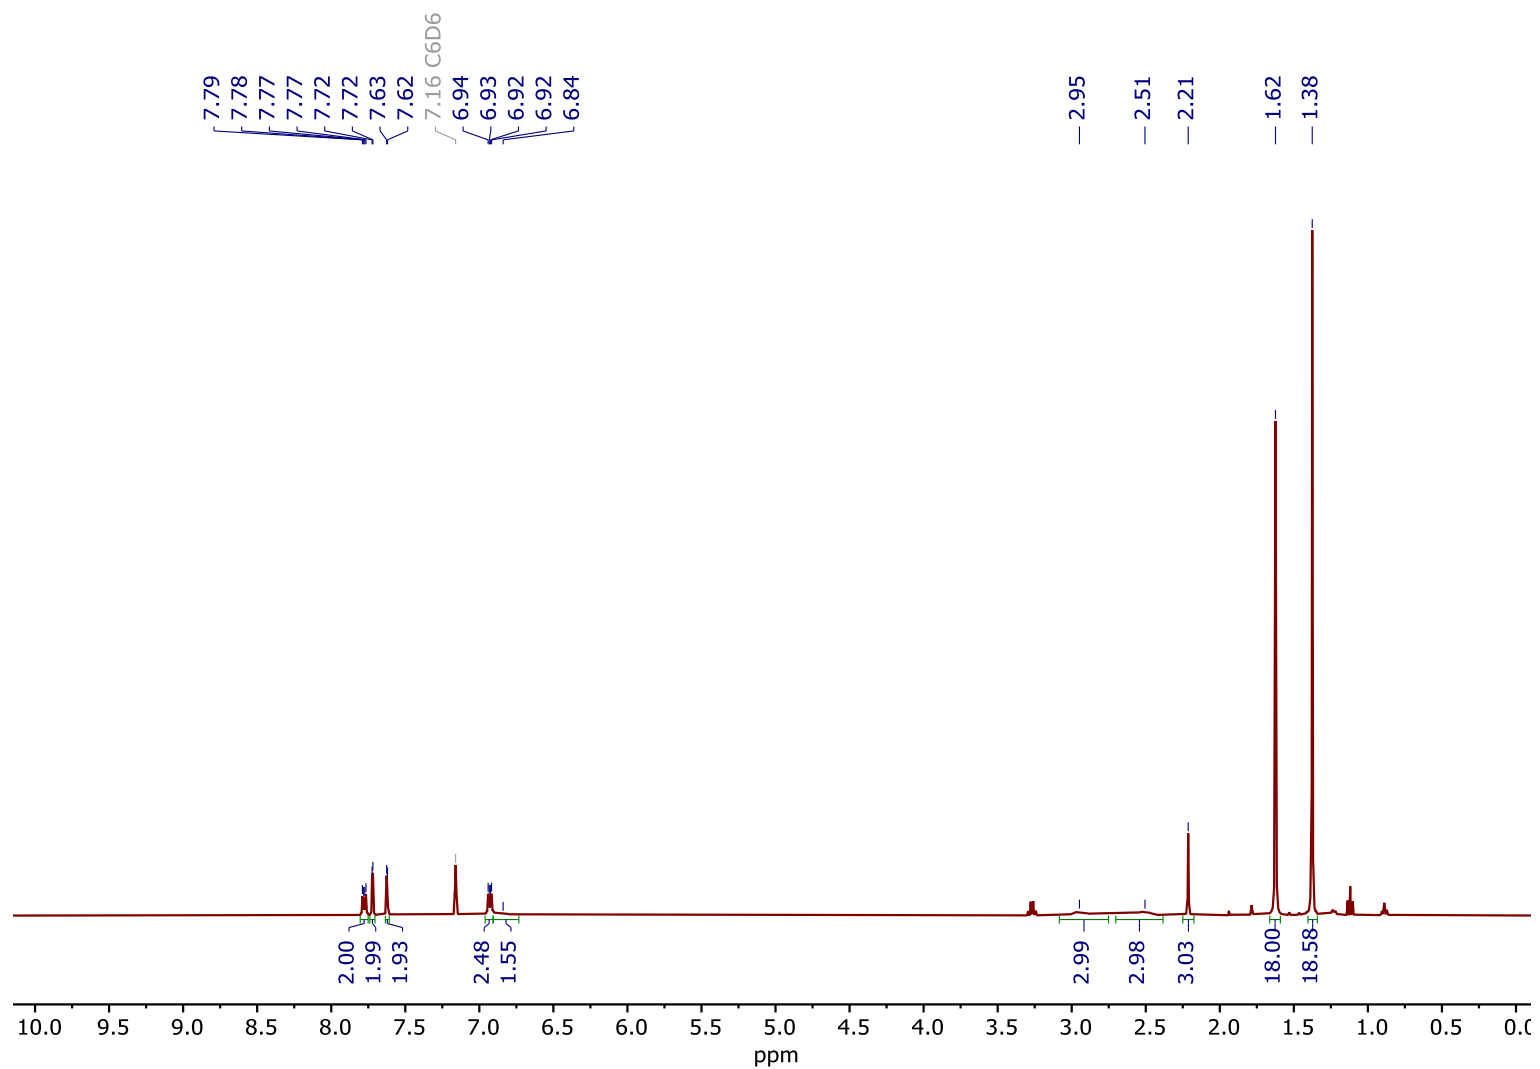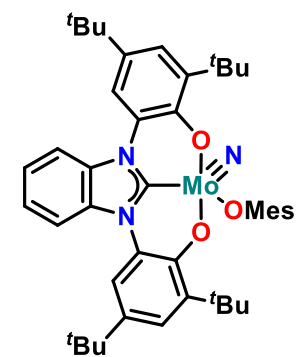

Figure S 71:  $^1\text{H}$  NMR of **2-OMes** in  $\text{C}_6\text{D}_6$  at 298 K.

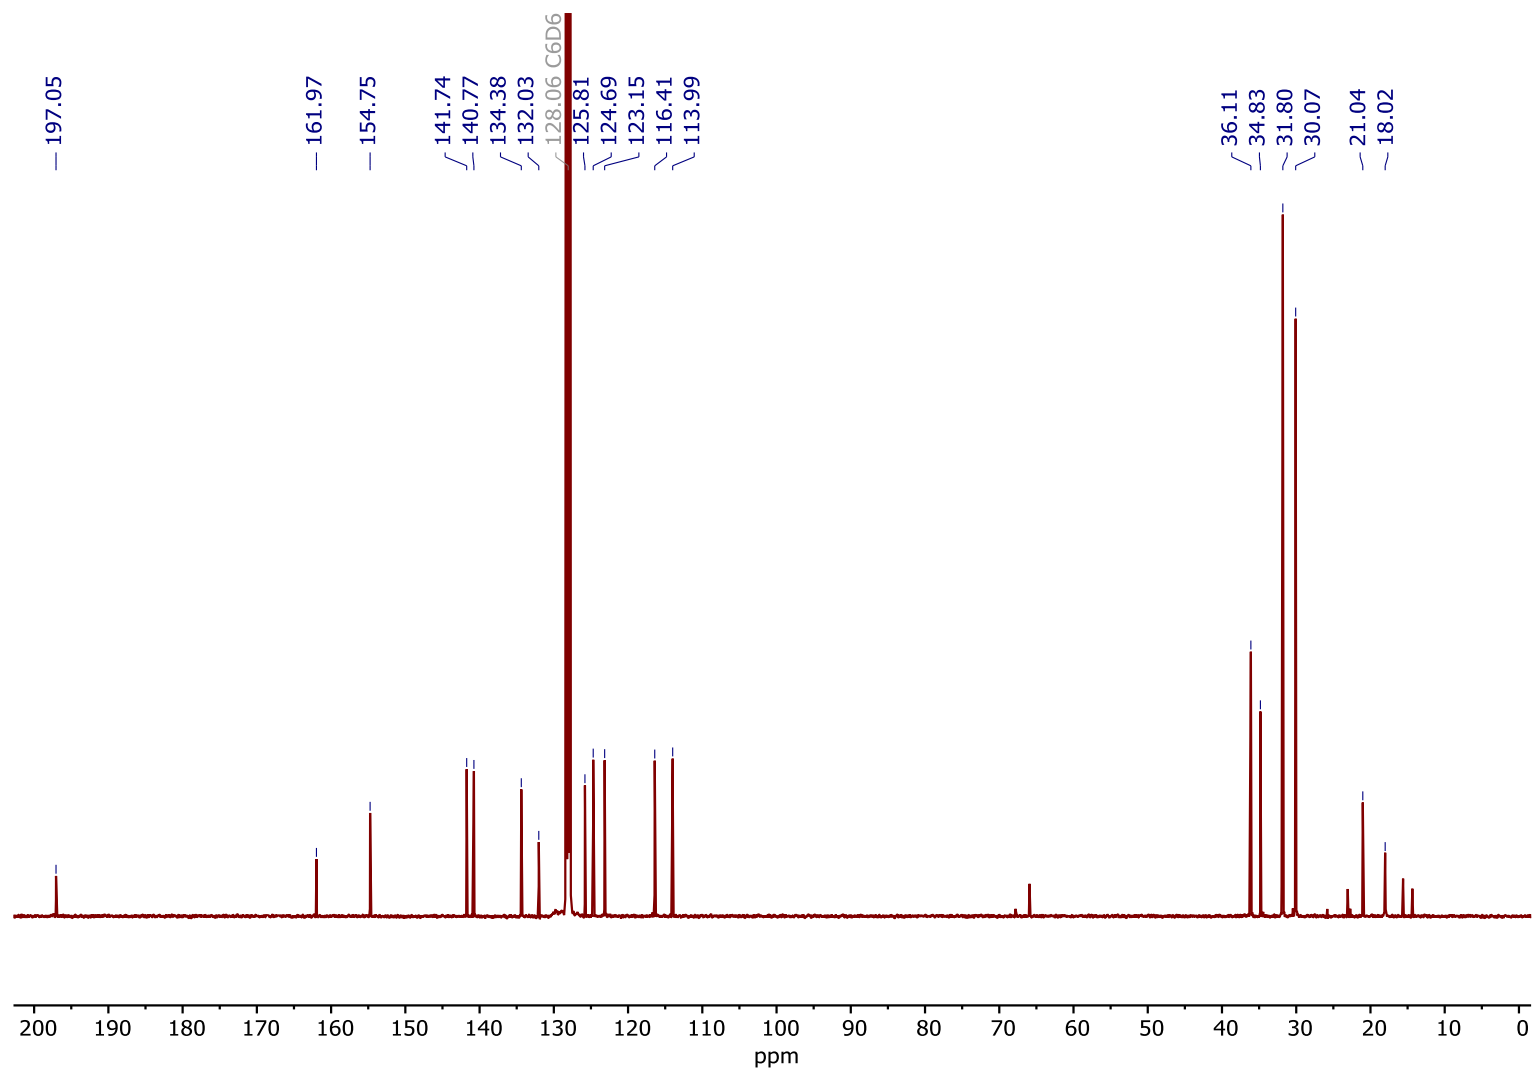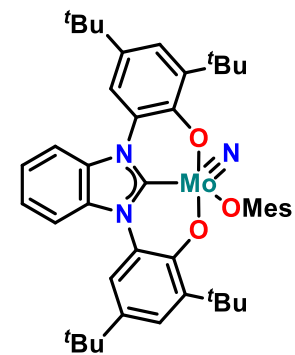

Figure S 72:  $^{13}\text{C}$  NMR of **2-OMes** in  $\text{C}_6\text{D}_6$  at 298 K.

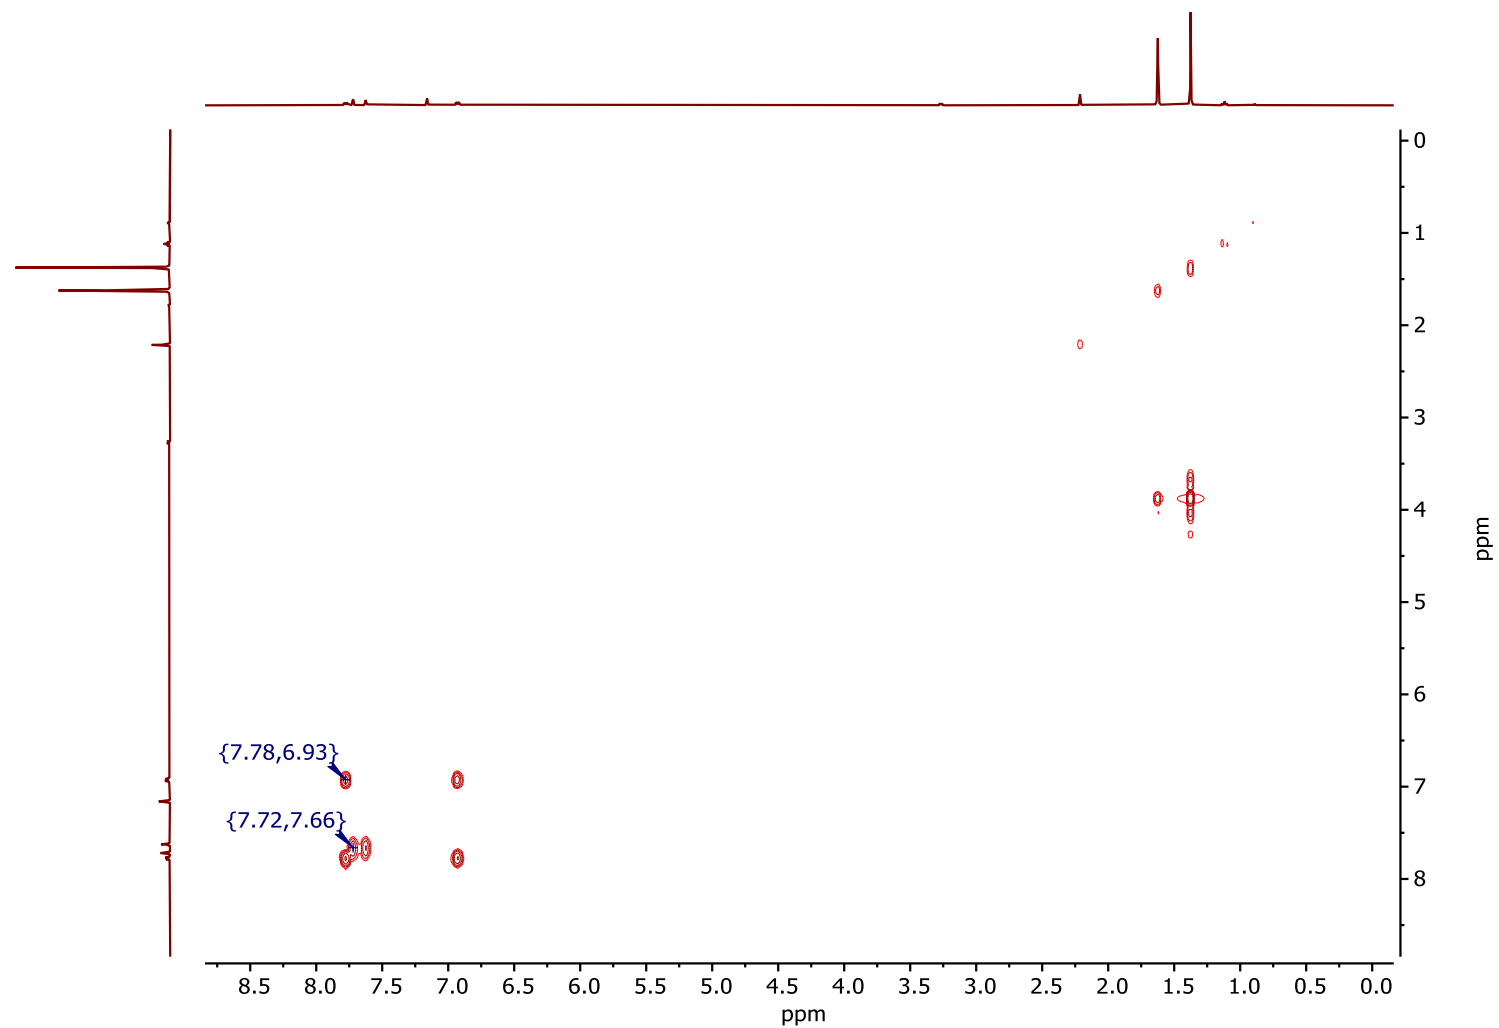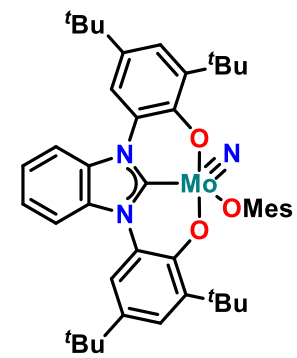

Figure S 73:  $^1\text{H} - ^1\text{H}$  COSY of **2-OMes** in  $\text{C}_6\text{D}_6$  at 298 K.

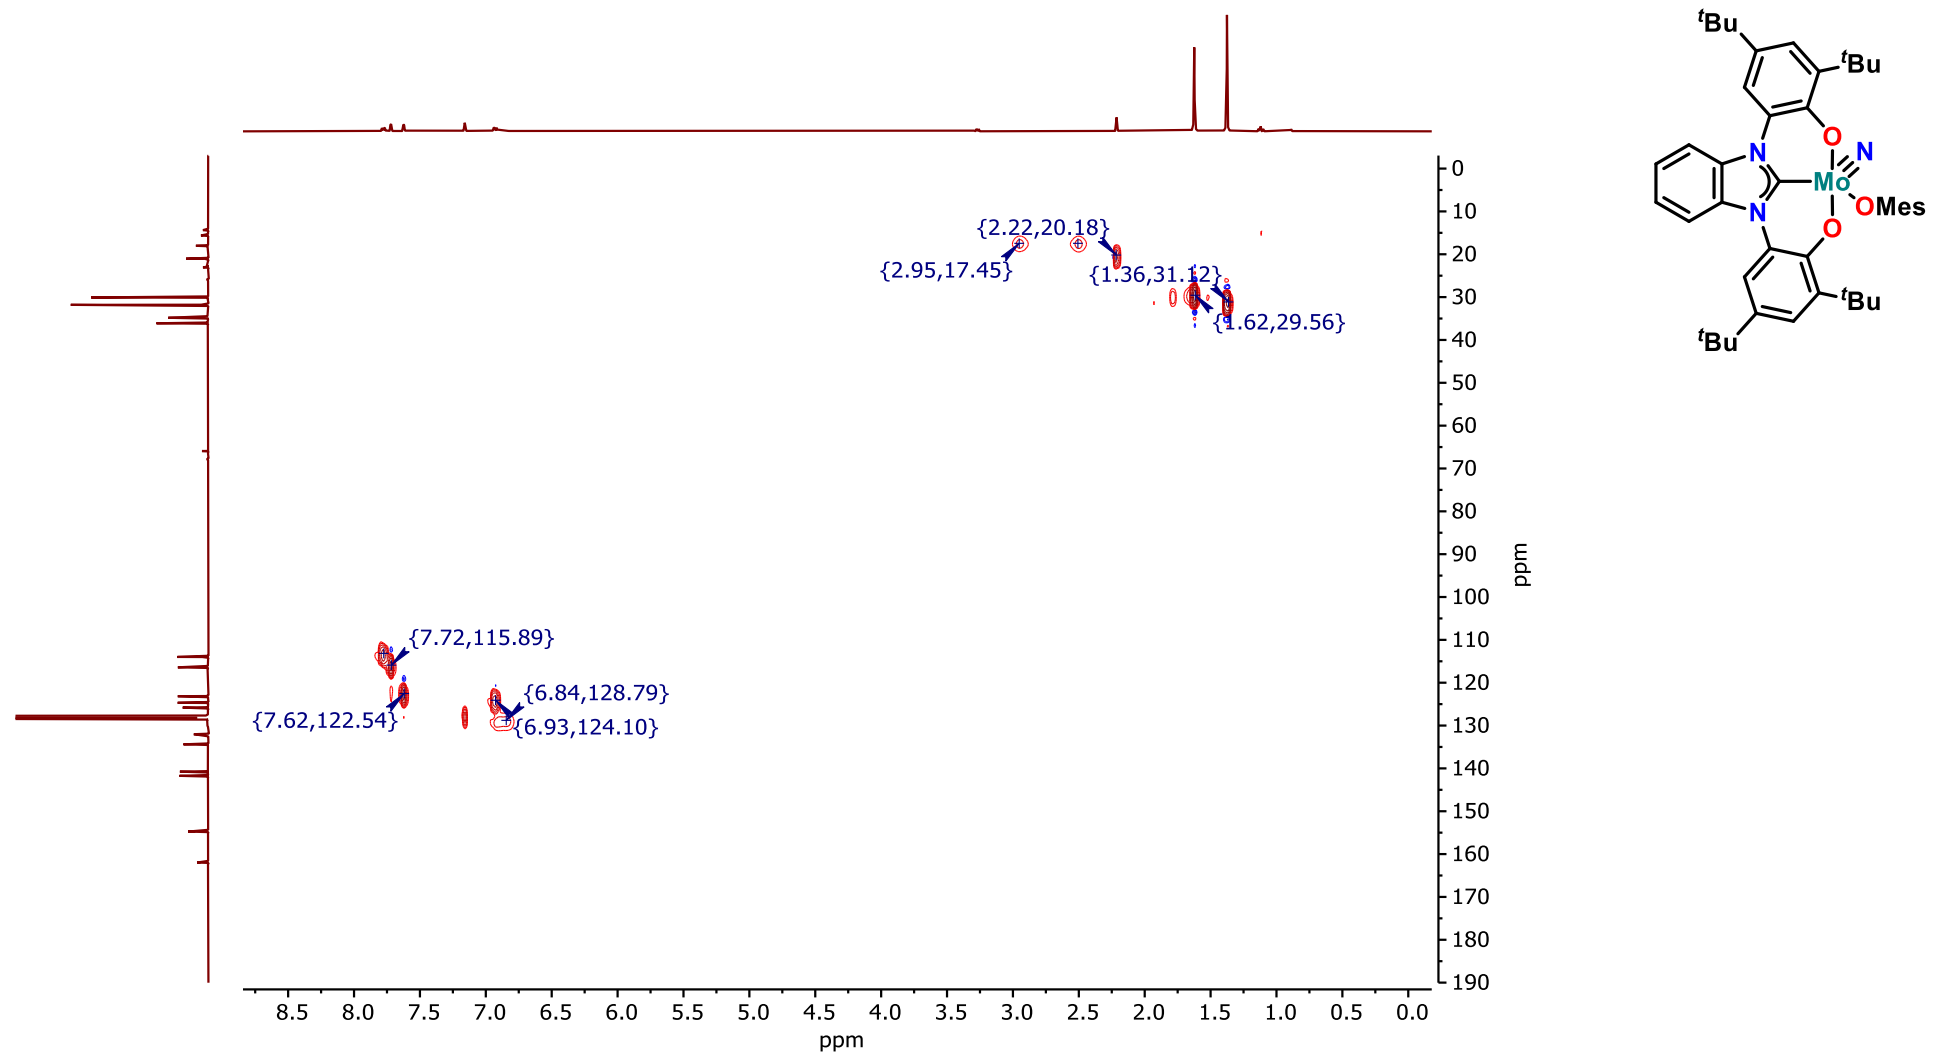

Figure S 74:  $^1\text{H} - ^{13}\text{C}$  HSQC of **2-OMes** in  $\text{C}_6\text{D}_6$  at 298 K.

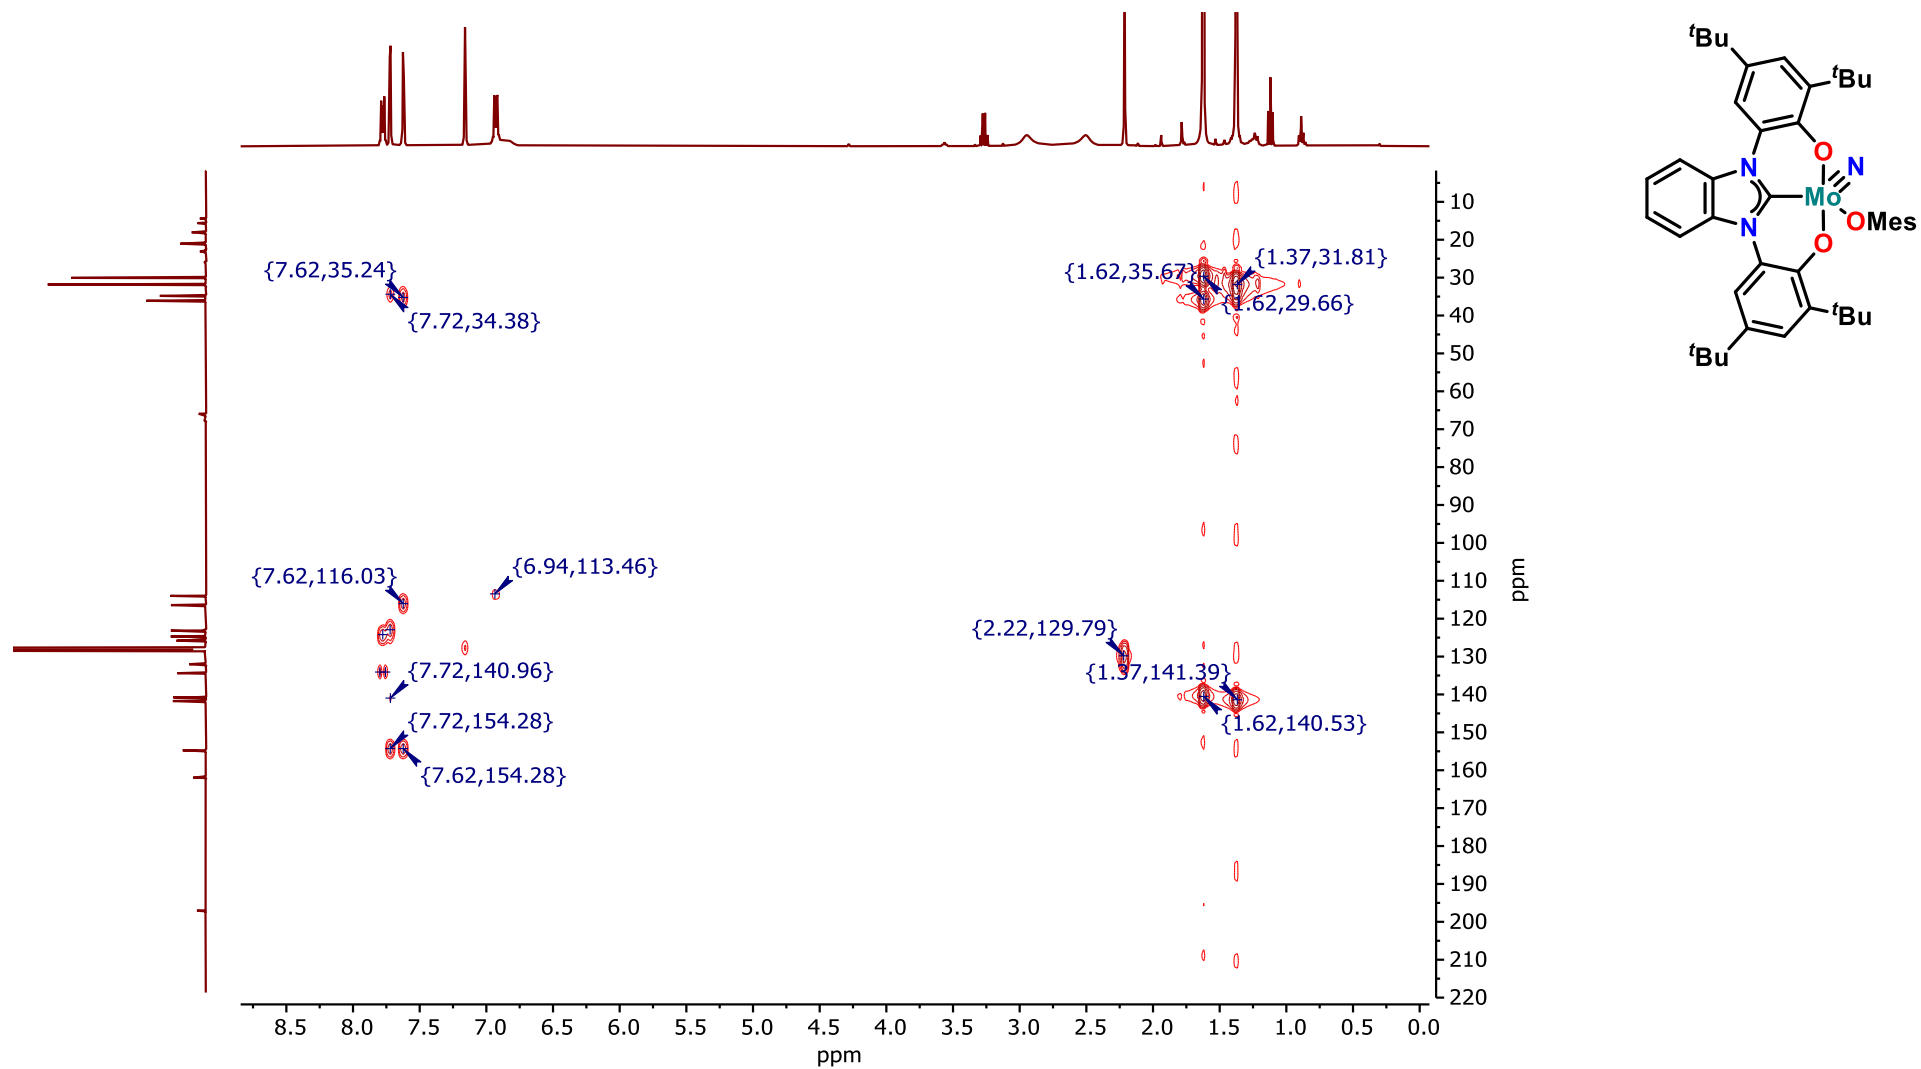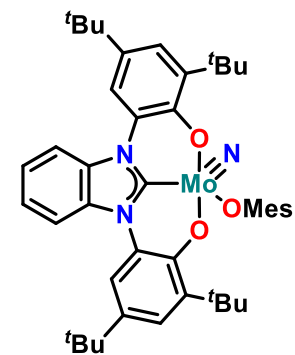



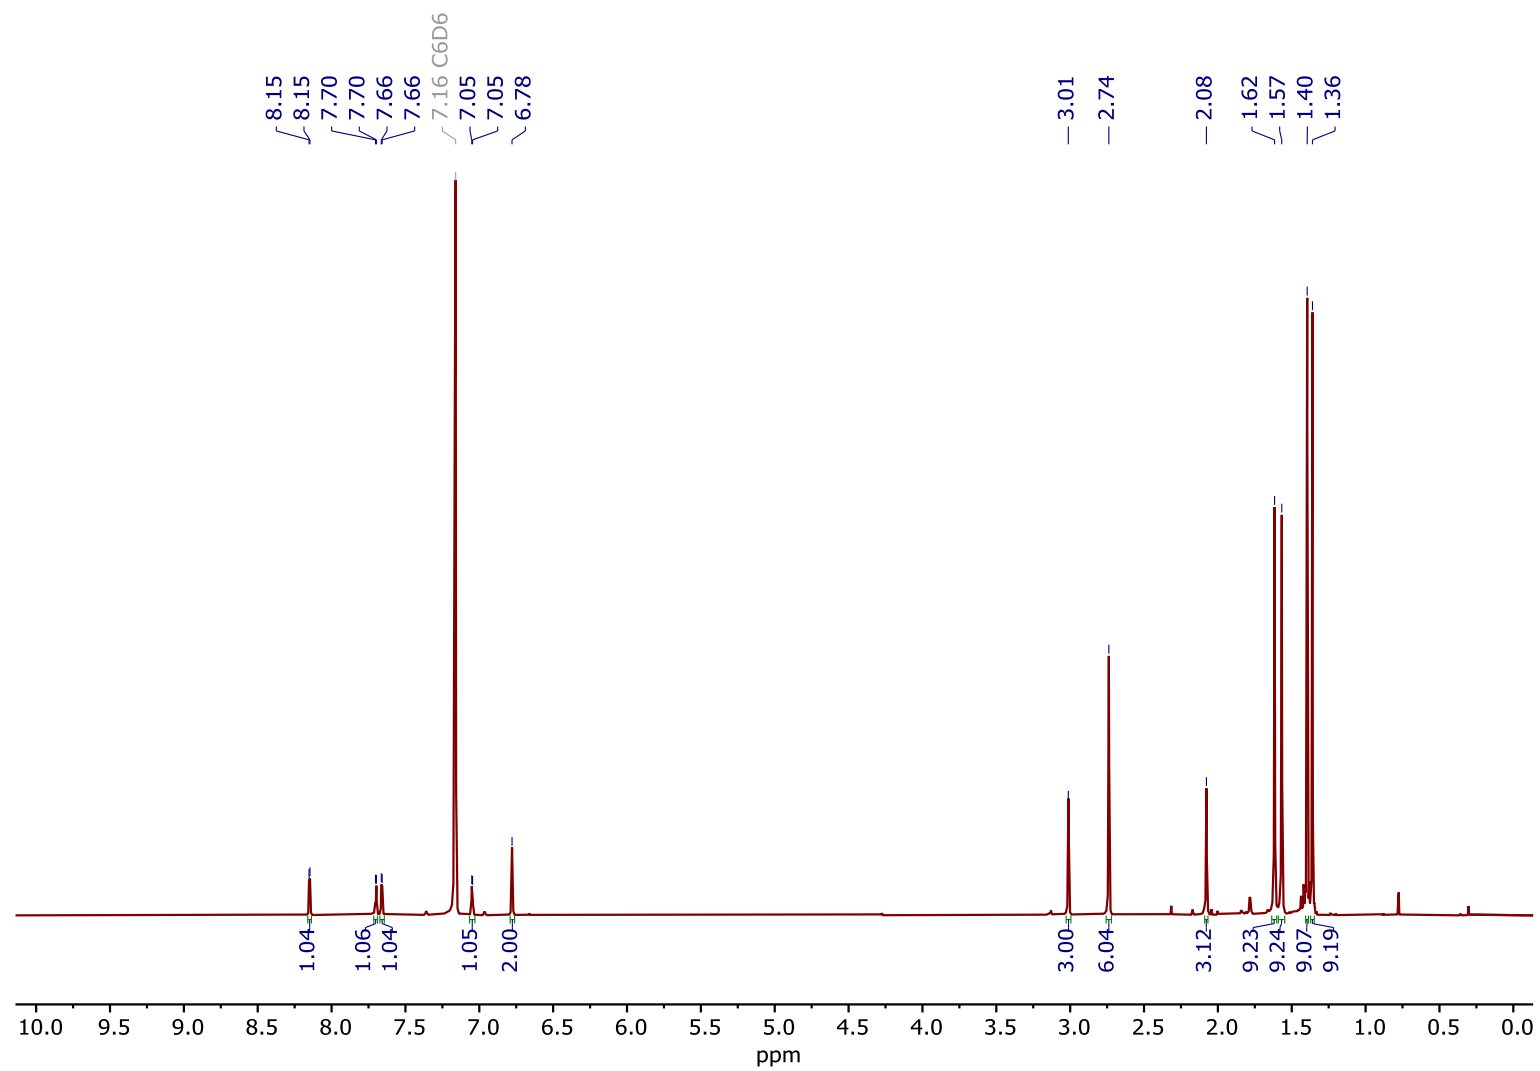

Figure S 76:  $^1\text{H}$  NMR of **1-SMes** in  $\text{C}_6\text{D}_6$  at 298 K.

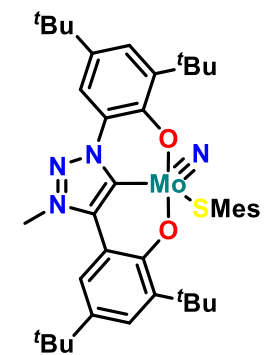

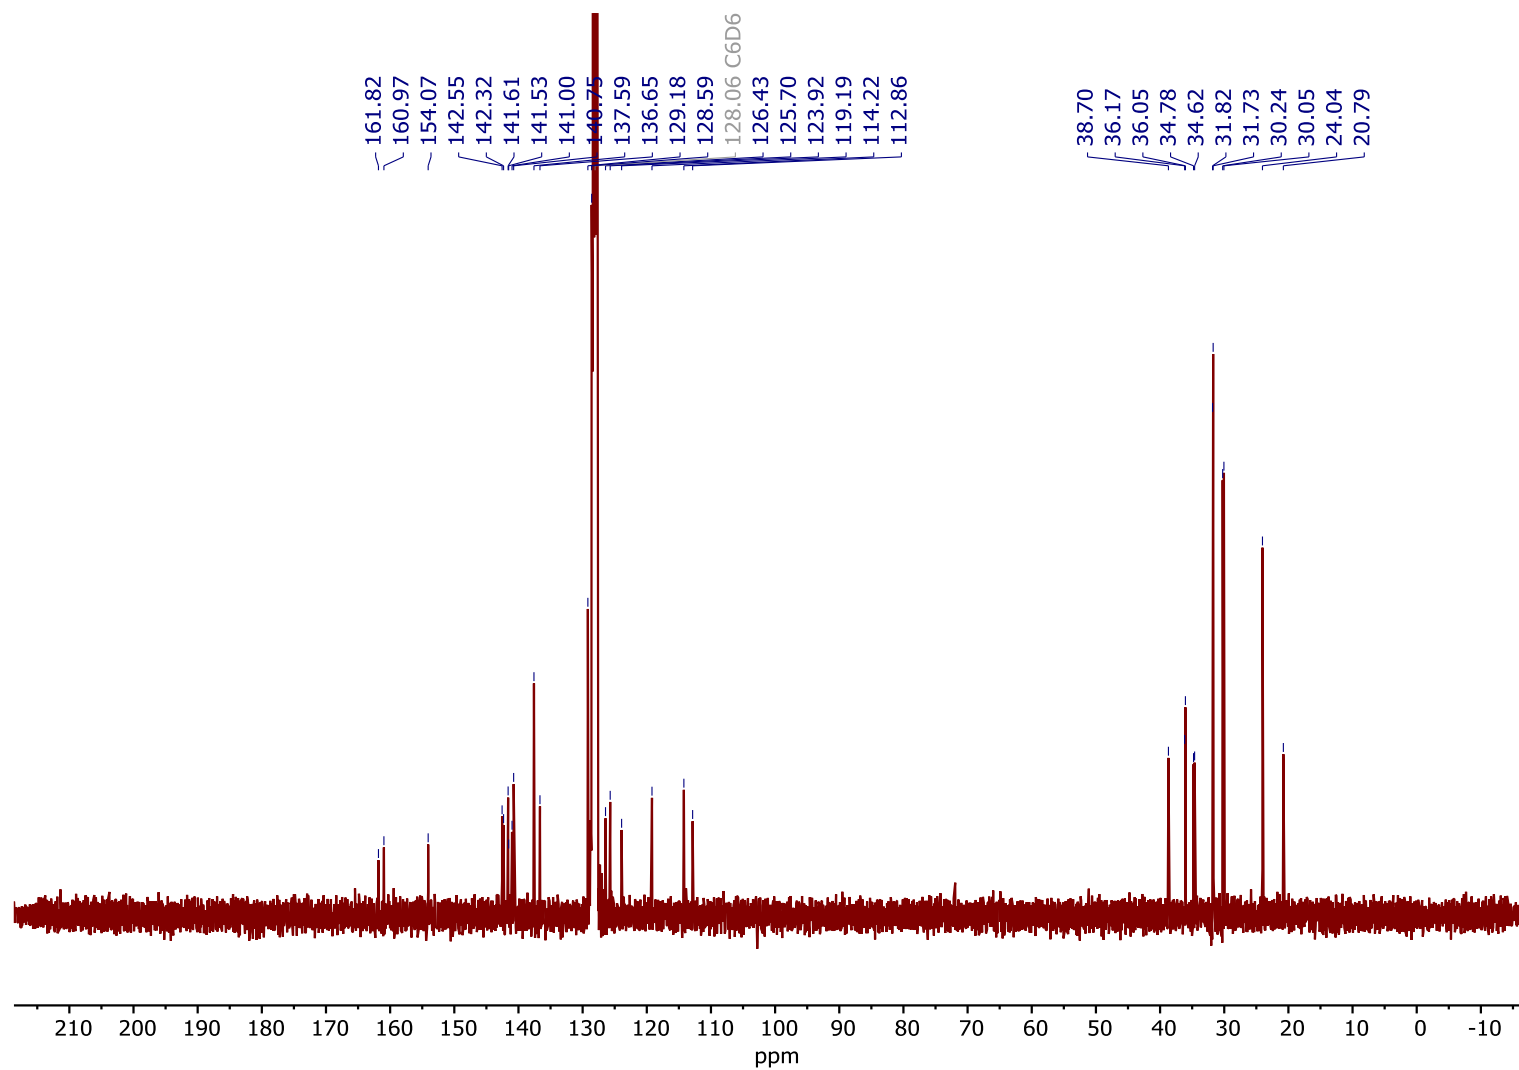

Figure S 77:  $^{13}\text{C}$  NMR of **1-SMes** in  $\text{C}_6\text{D}_6$  at 298 K.

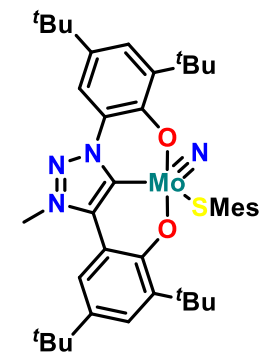

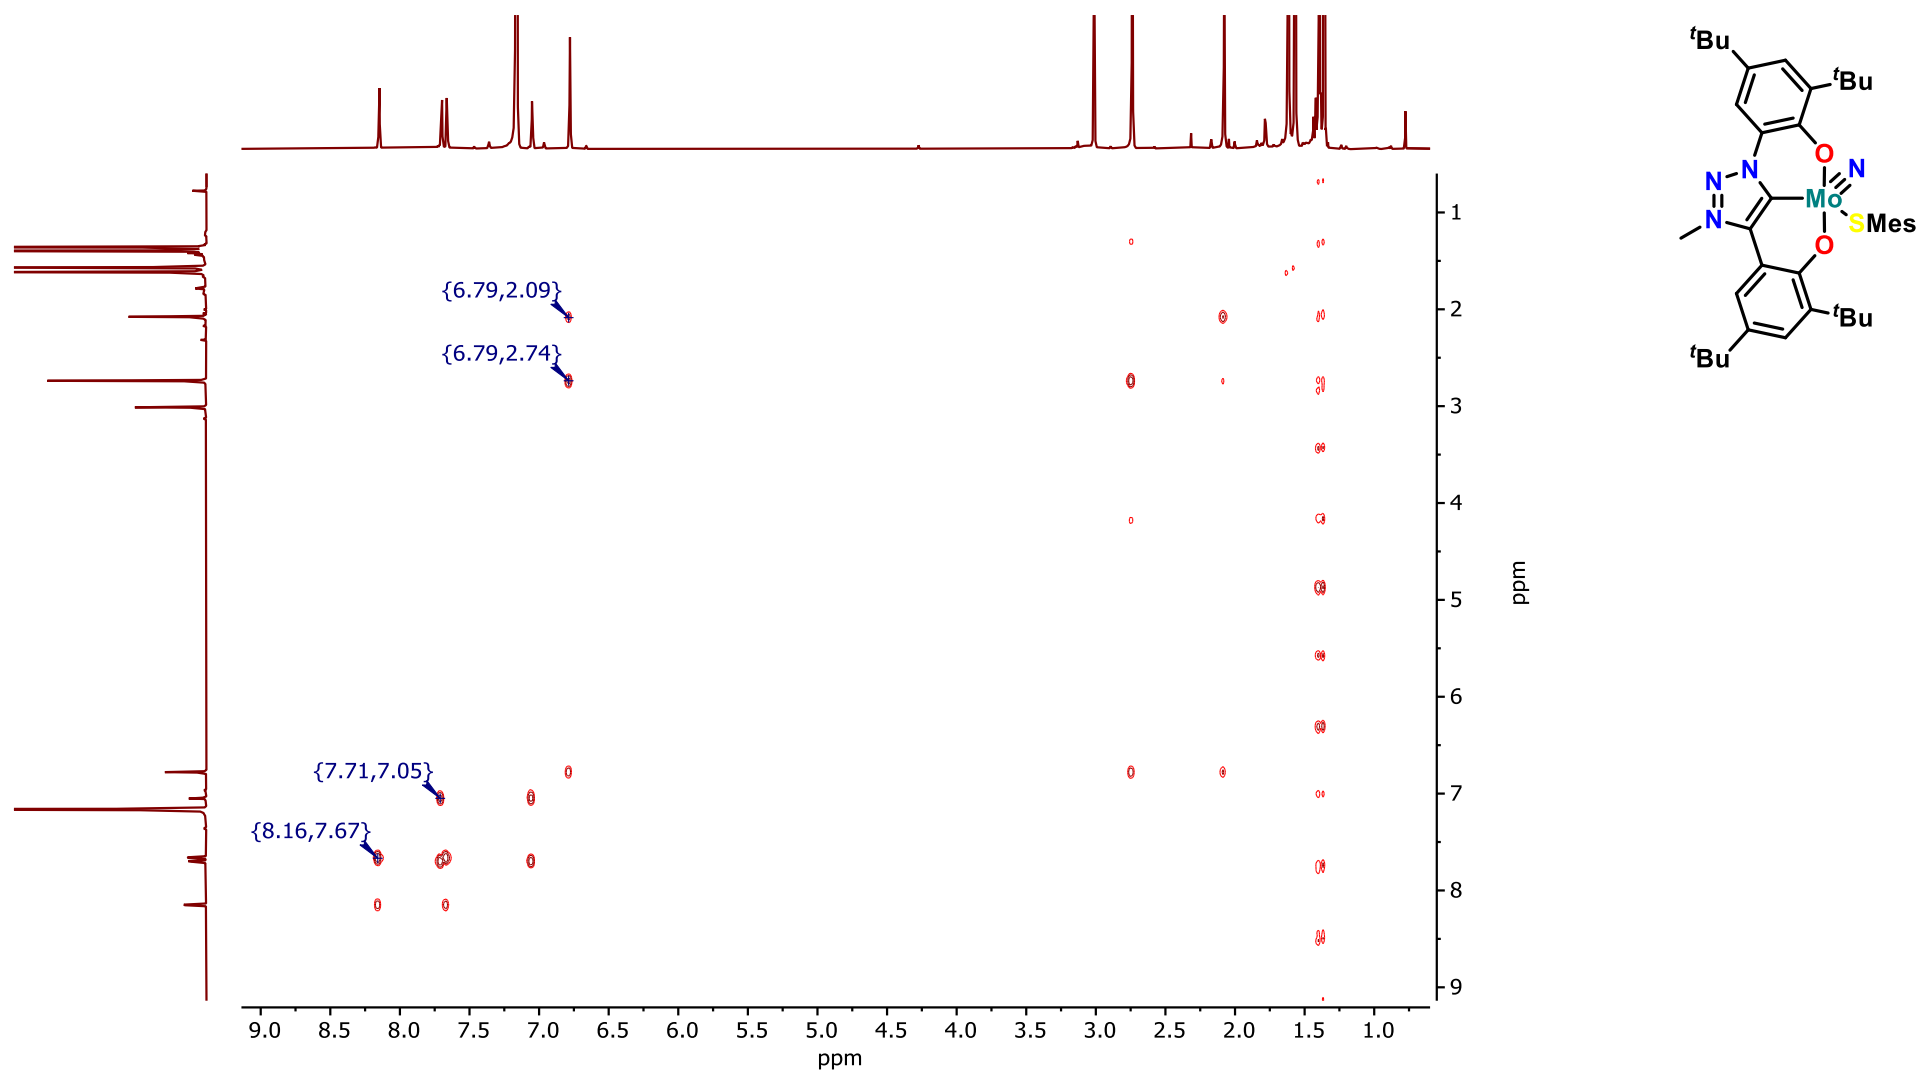

Figure S 78:  $^1\text{H} - ^1\text{H}$  COSY of **1-SMes** in  $\text{C}_6\text{D}_6$  at 298 K.

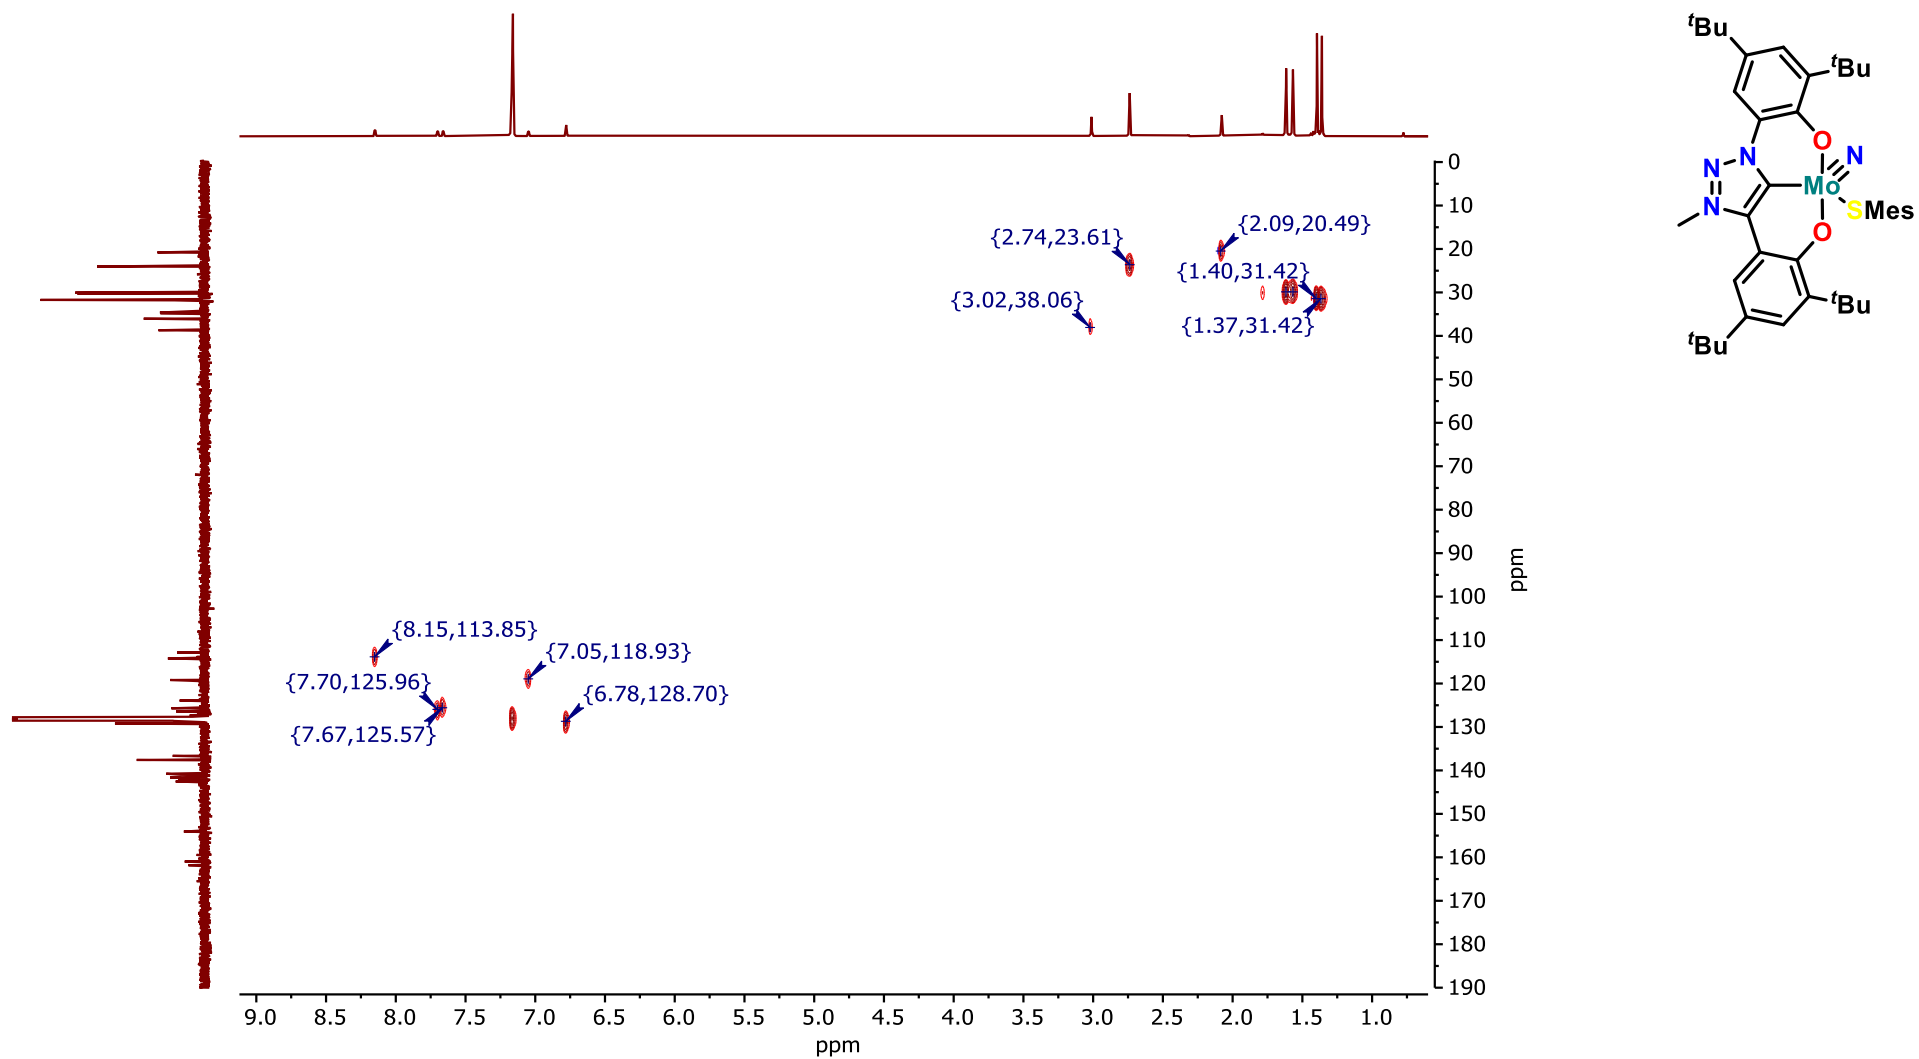

Figure S 79:  $^1\text{H}$  -  $^{13}\text{C}$  HSQC of **1-SMes** in  $\text{C}_6\text{D}_6$  at 298 K.

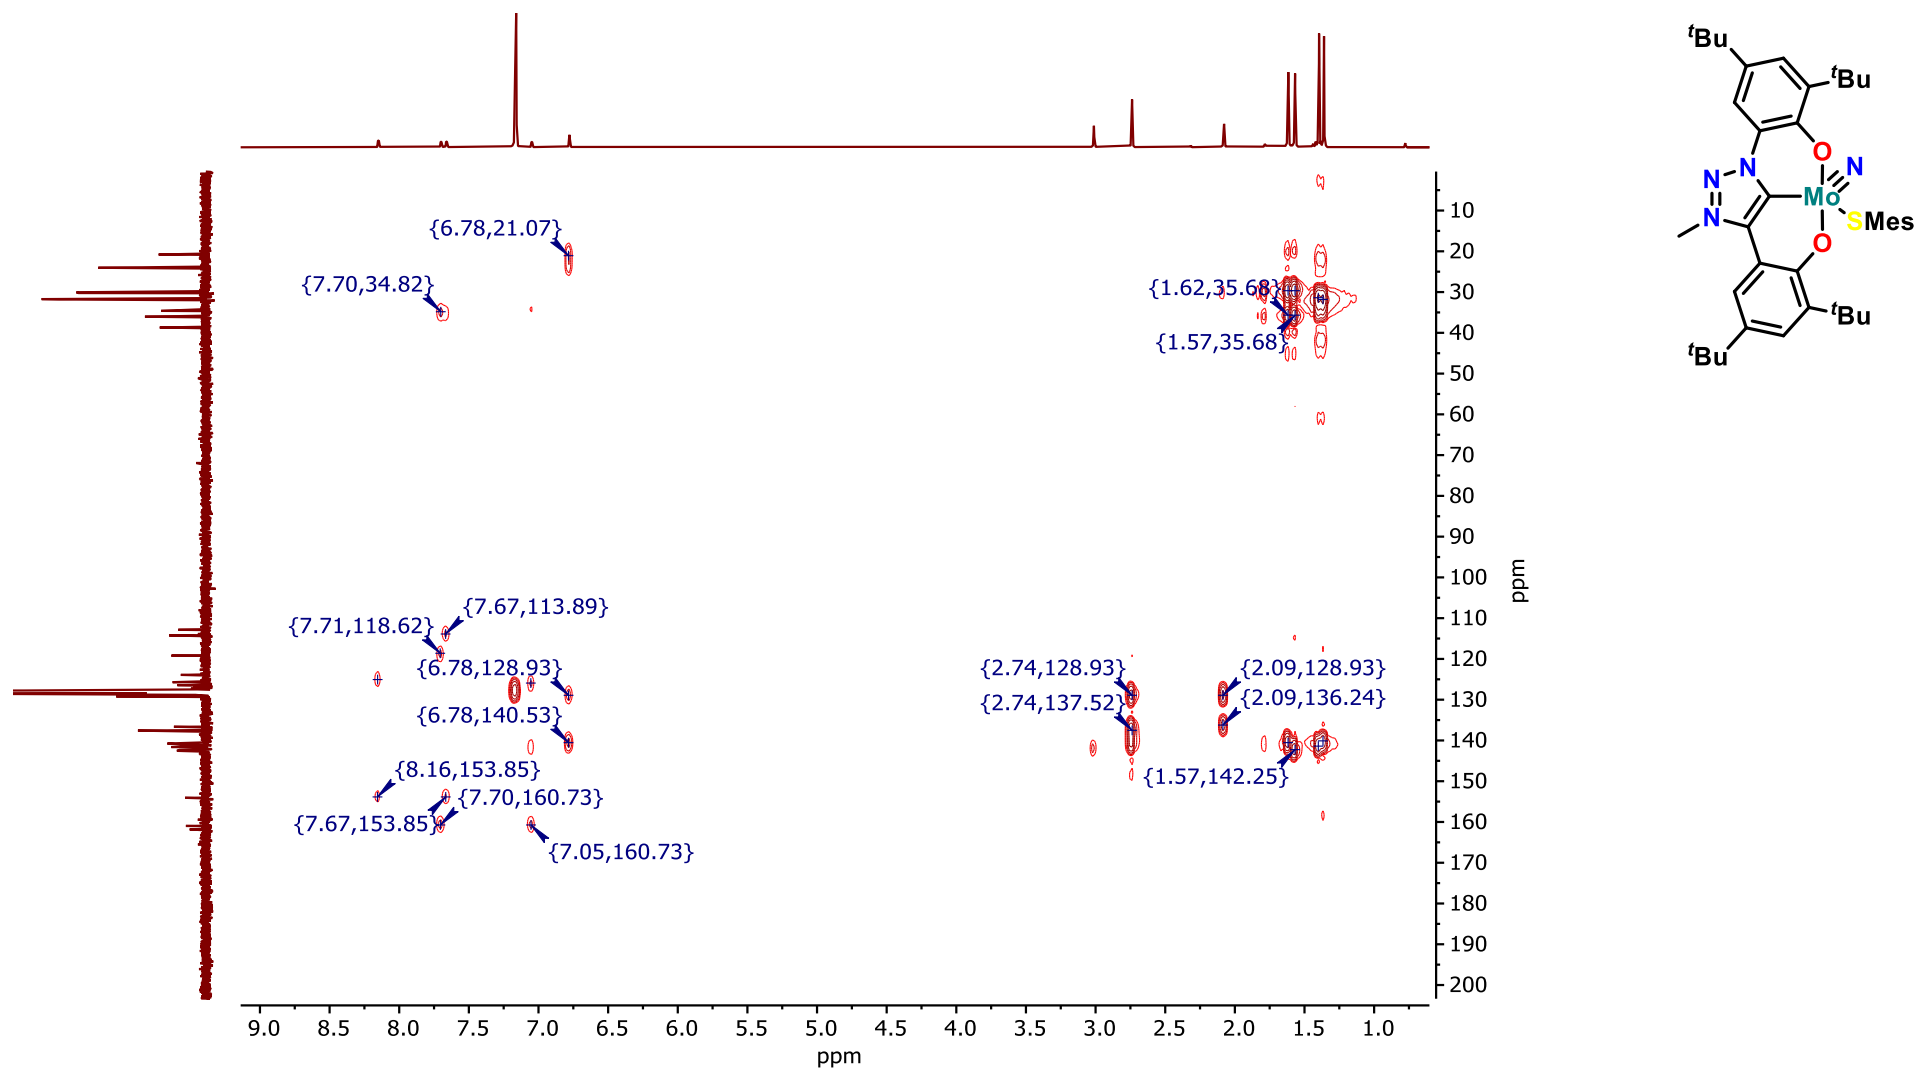

Figure S 80:  $^1\text{H}$  -  $^{13}\text{C}$  HMBC of **1-SMes** in  $\text{C}_6\text{D}_6$  at 298 K.

## 2. IR spectroscopy

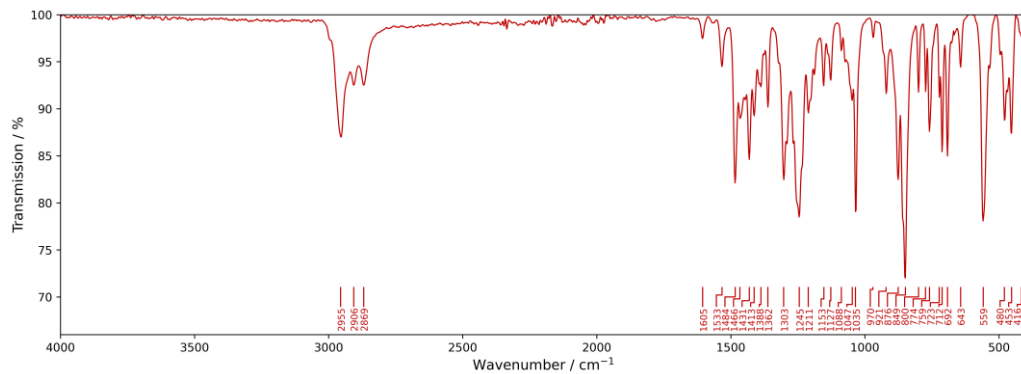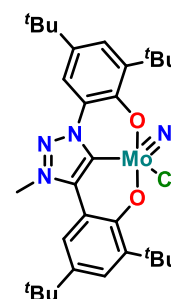

Figure S 81: ATR-IR spectrum of **1-Cl** at 298 K.

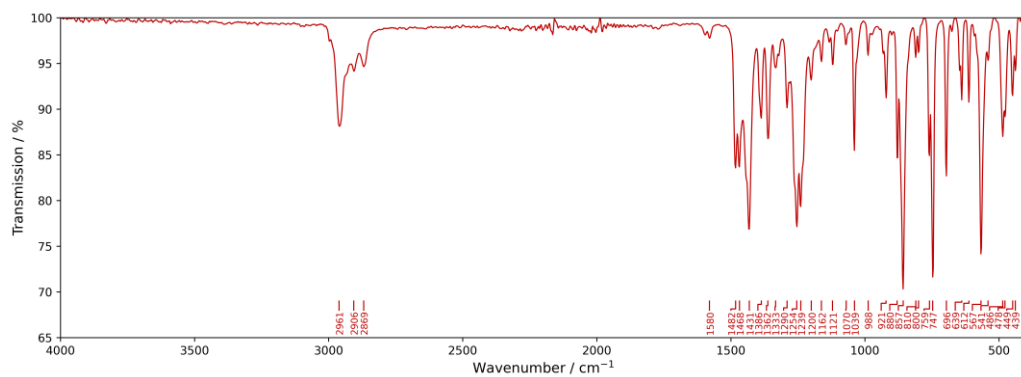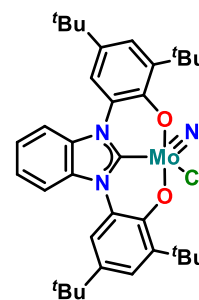

Figure S 82: ATR-IR spectrum of **2-Cl** at 298 K.

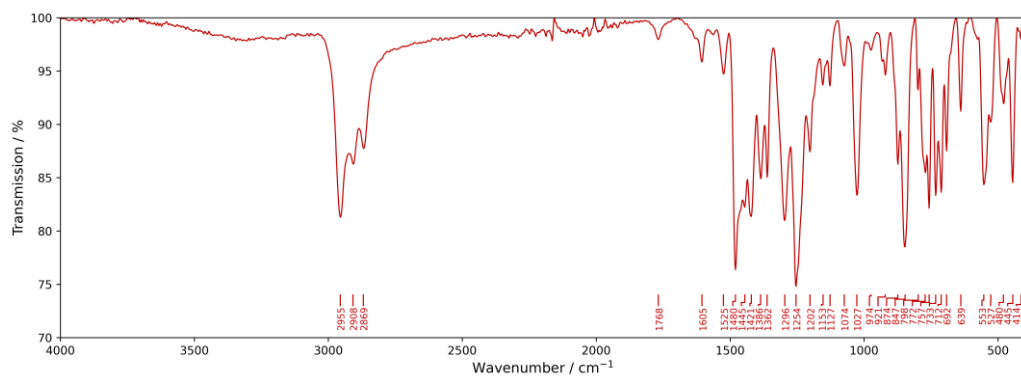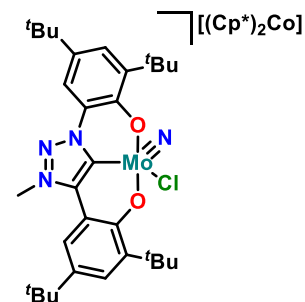

Figure S 83: ATR-IR spectrum of **[1-Cl]** at 298 K.

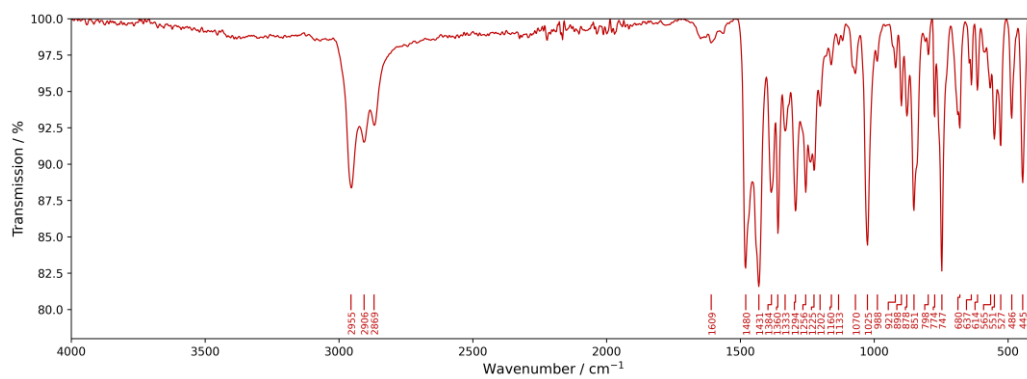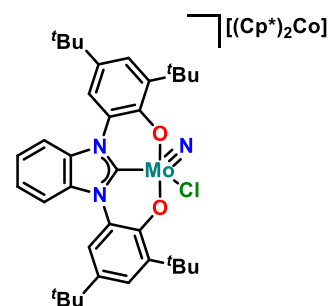

Figure S 84: ATR-IR spectrum of  $[2-Cl]^-$  at 298 K.

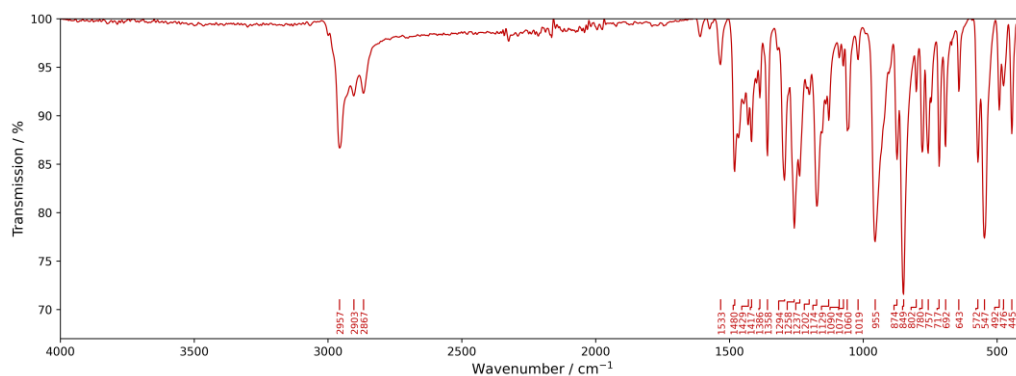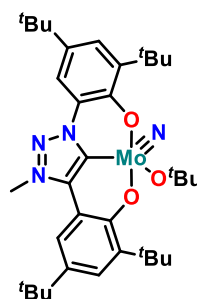

Figure S 85: ATR-IR spectrum of  $1-O^tBu$  at 298 K.

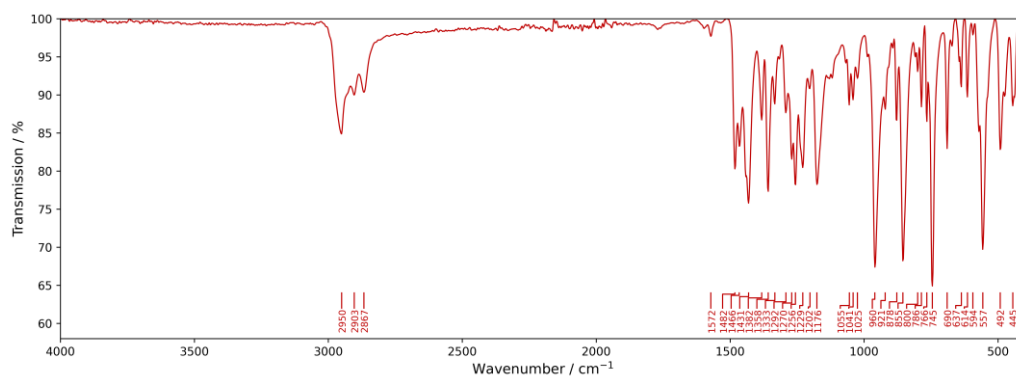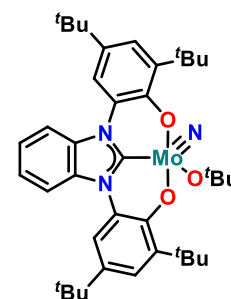

Figure S 86: ATR-IR spectrum of  $2-O^tBu$  at 298 K.

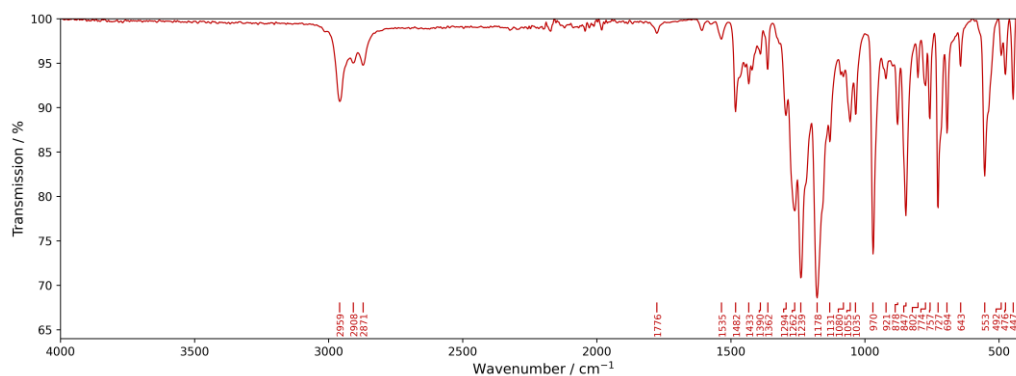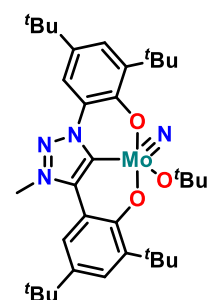

Figure S 87: ATR-IR spectrum of  $1-O^tBu^F$  at 298 K.

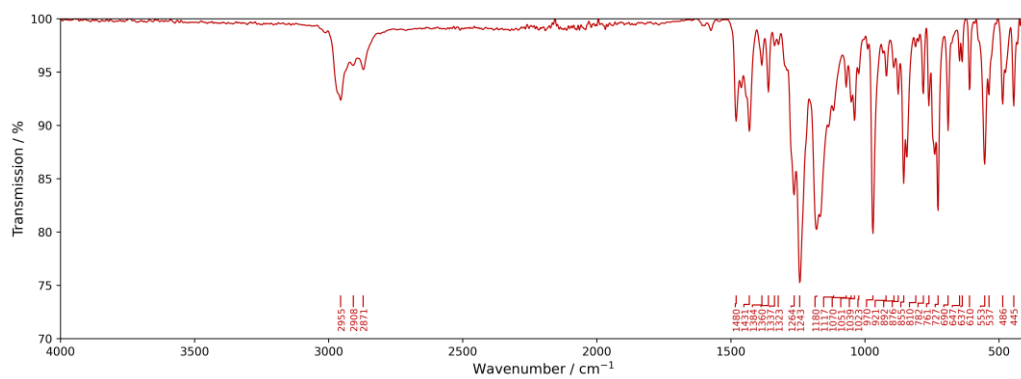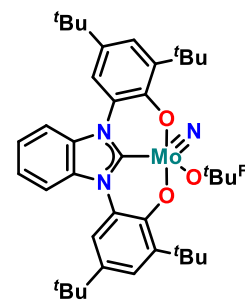

Figure S 88: ATR-IR spectrum of **2-O<sup>t</sup>Bu<sup>F</sup>9** at 298 K.

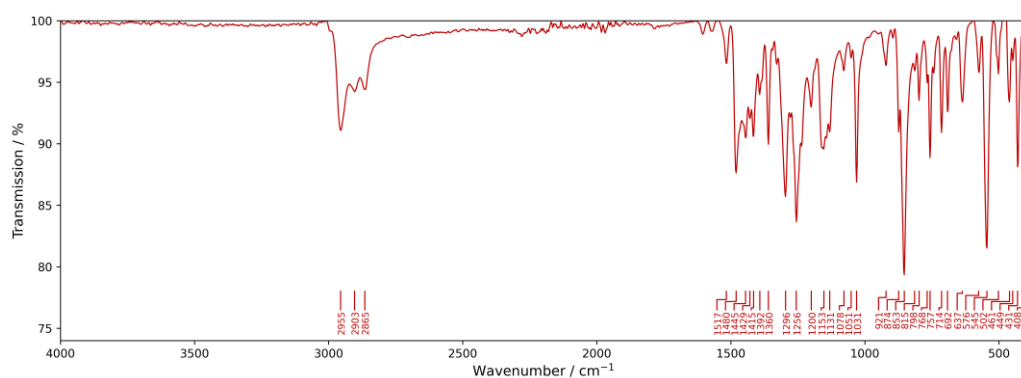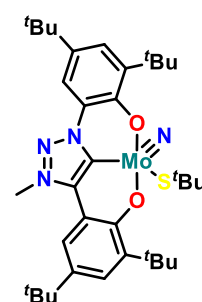

Figure S 89: ATR-IR spectrum of **1-S<sup>t</sup>Bu** at 298 K.

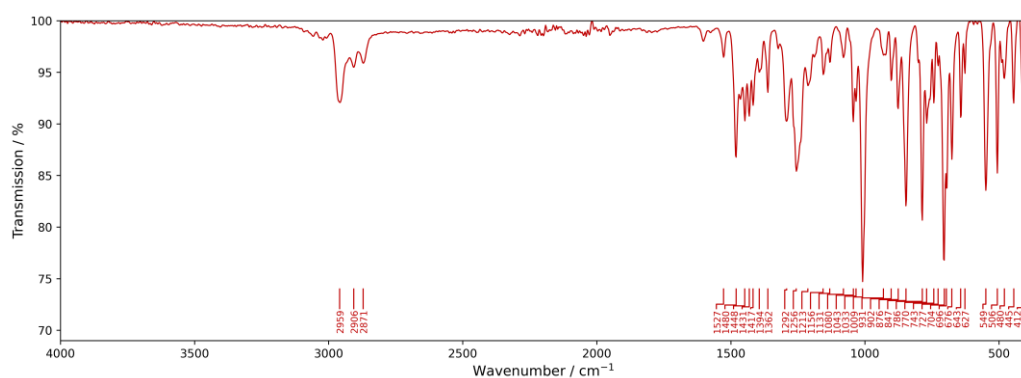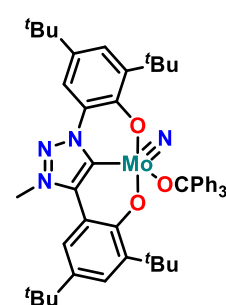

Figure S 90: ATR-IR spectrum of **1-OCPh<sub>3</sub>** at 298 K.

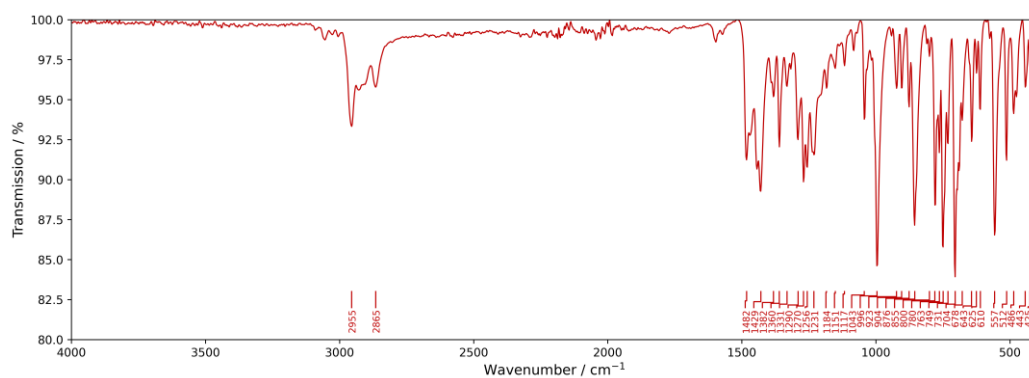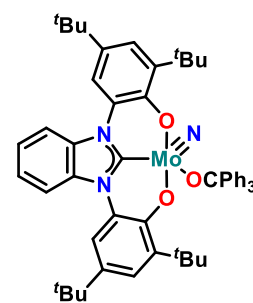

Figure S 91: ATR-IR spectrum of **2-OCPh<sub>3</sub>** at 298 K.



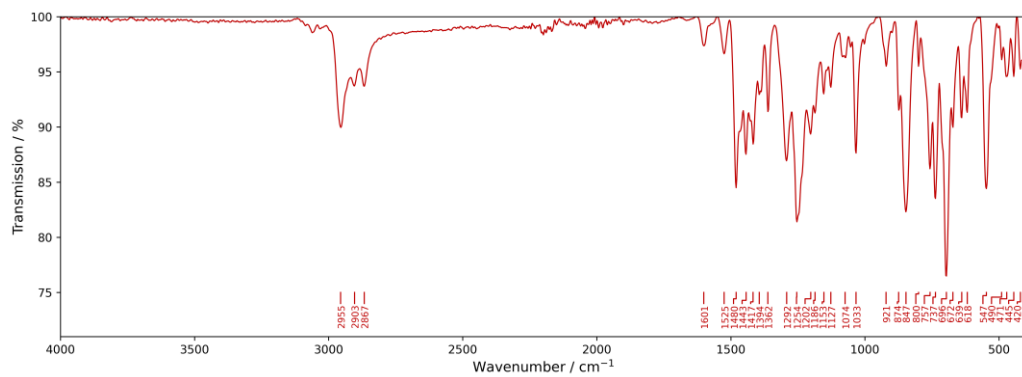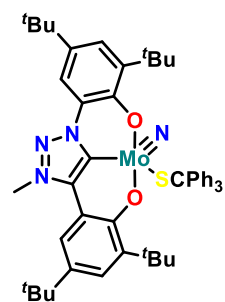

Figure S 92: ATR-IR spectrum of **1-SCPh<sub>3</sub>** at 298 K.

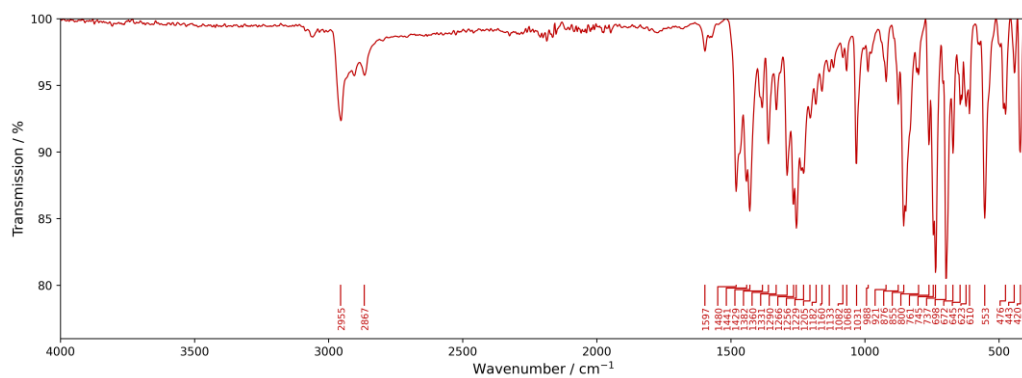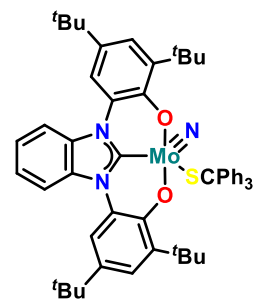

Figure S 93: ATR-IR spectrum of **2-SCPh<sub>3</sub>** at 298 K.

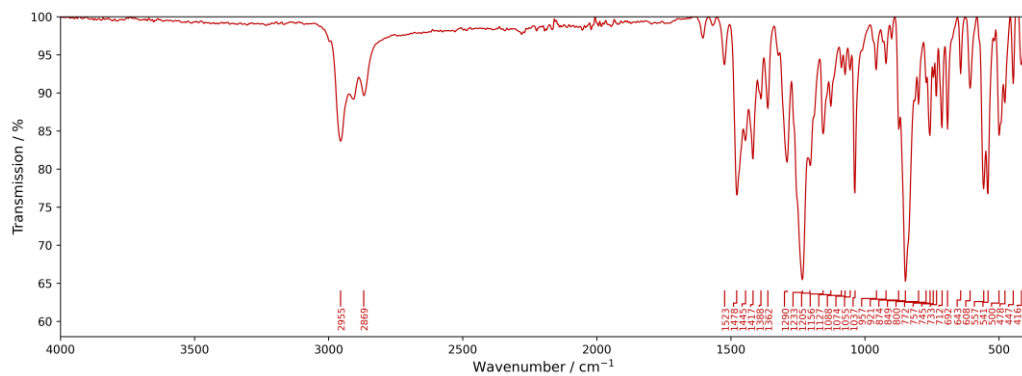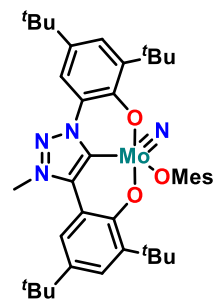

Figure S 94: ATR-IR spectrum of **1-OMes** at 298 K.

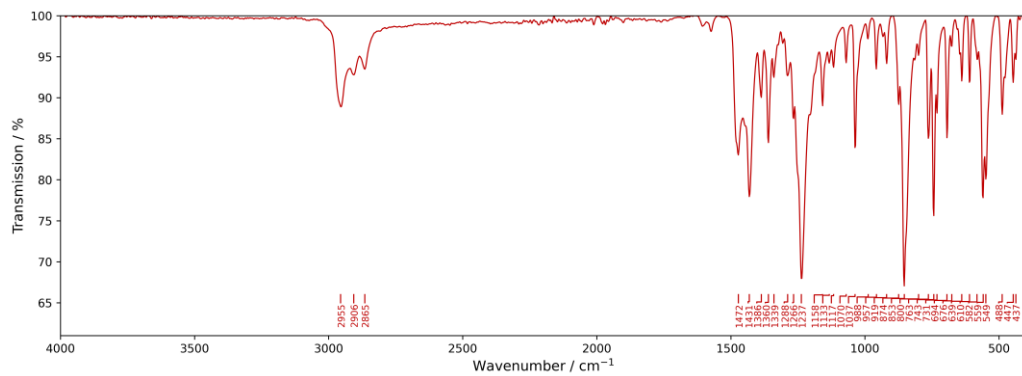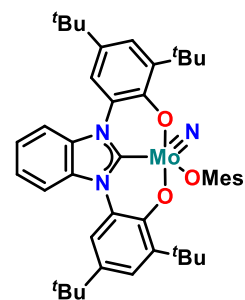

Figure S 95: ATR-IR spectrum of **2-OMes** at 298 K.

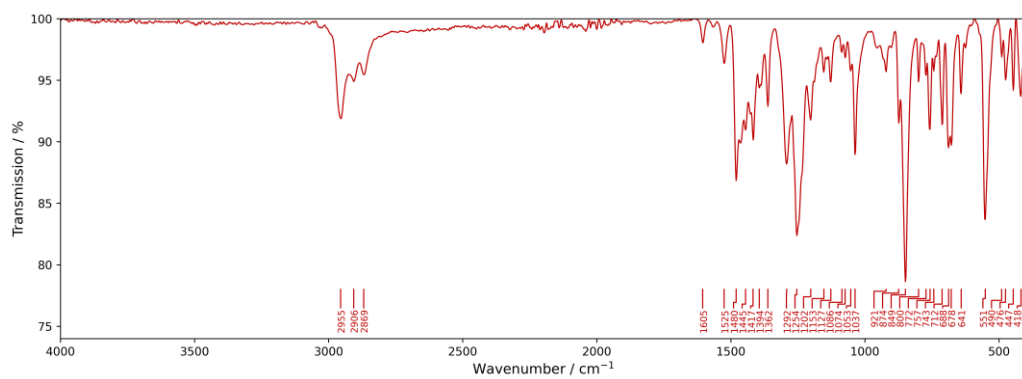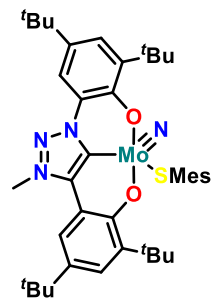

Figure S 96: ATR-IR spectrum of **1-SMes** at 298 K.

### 3. UV-Vis Spectroscopy

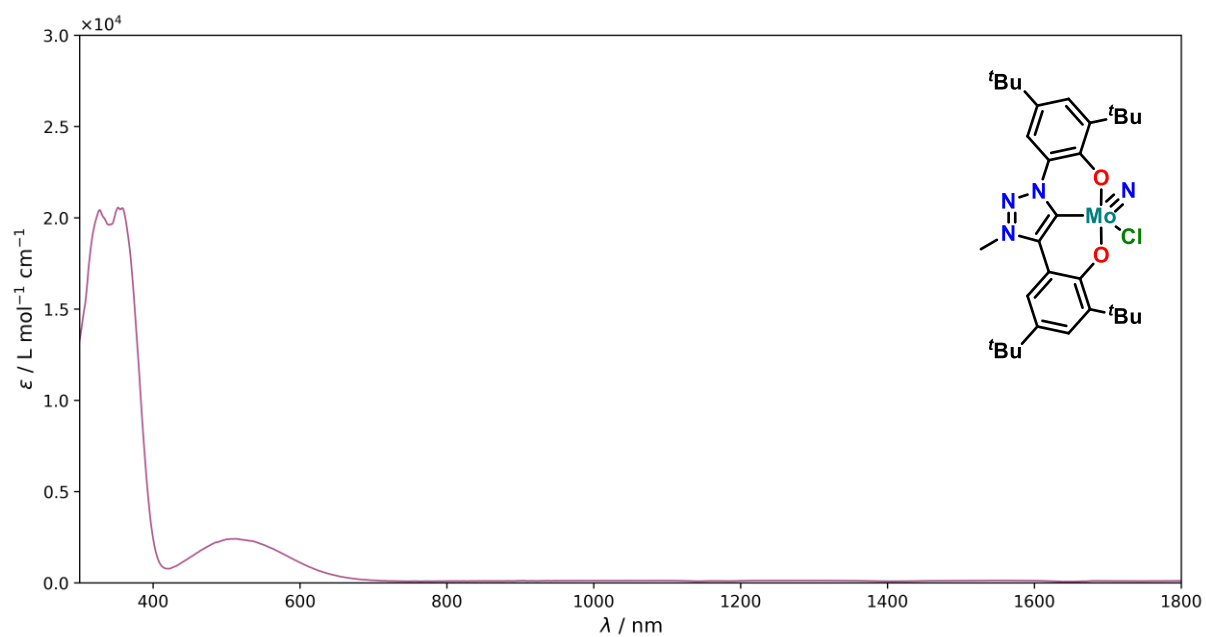

Figure S 97: UV-VIS-NIR spectrum of **1-Cl** in  $\text{CH}_2\text{Cl}_2$  at 298 K.

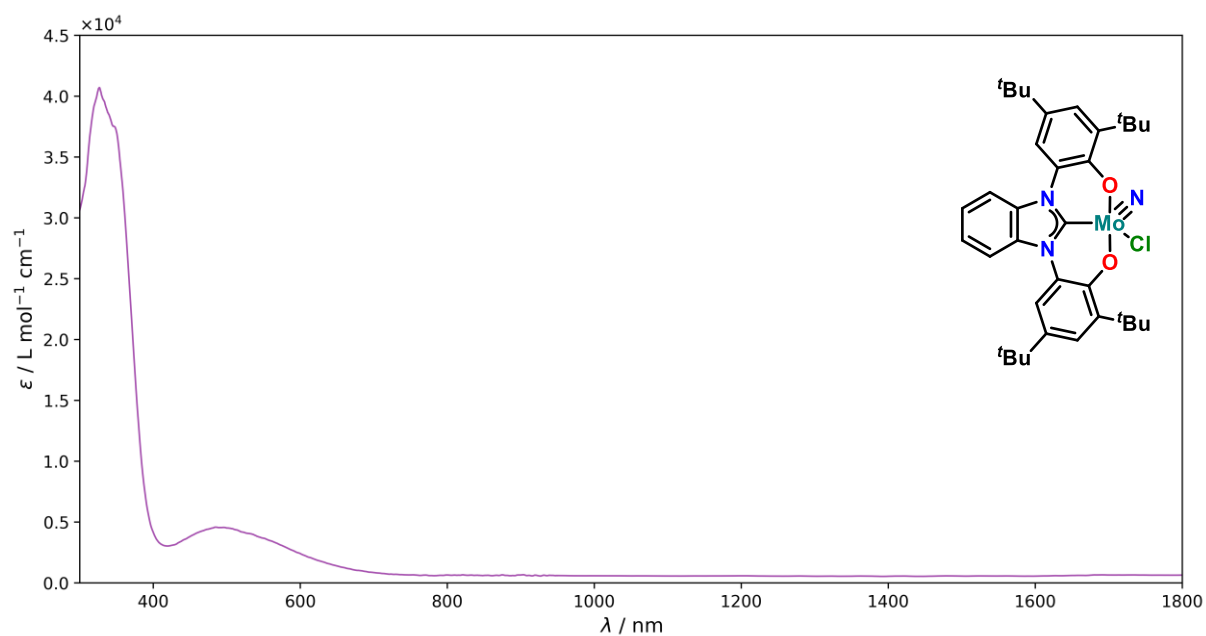

Figure S 98: UV-VIS-NIR spectrum of **2-Cl** in  $\text{CH}_2\text{Cl}_2$  at 298 K.

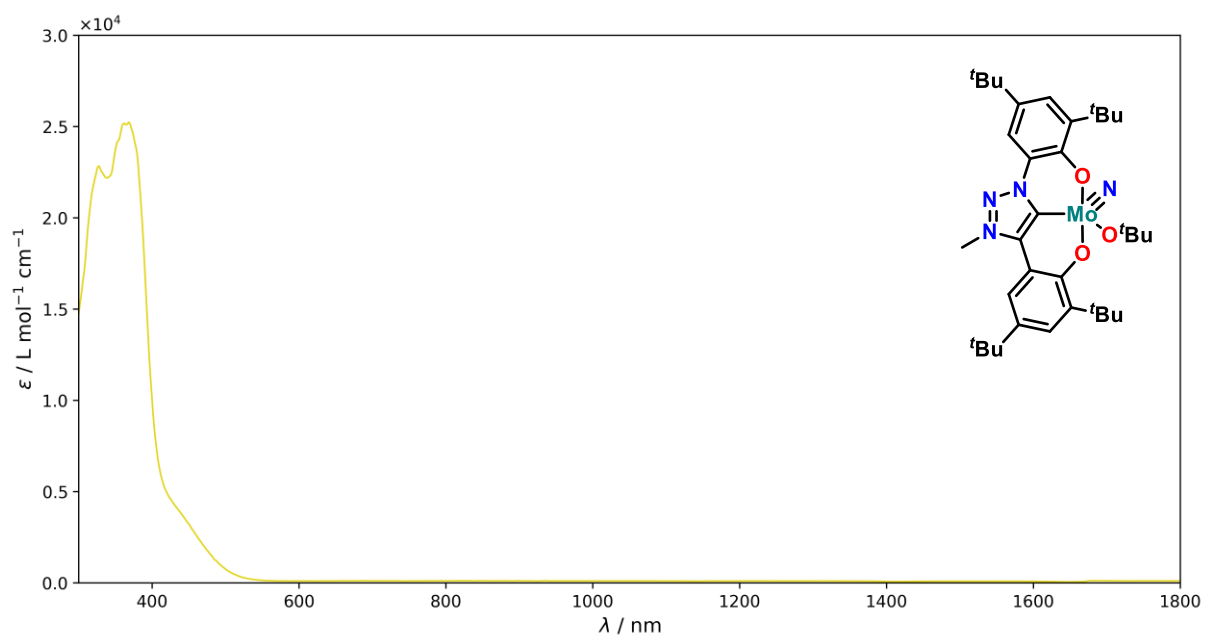

Figure S 99: UV-VIS-NIR spectrum of **1-O<sup>t</sup>Bu** in toluene at 298 K.

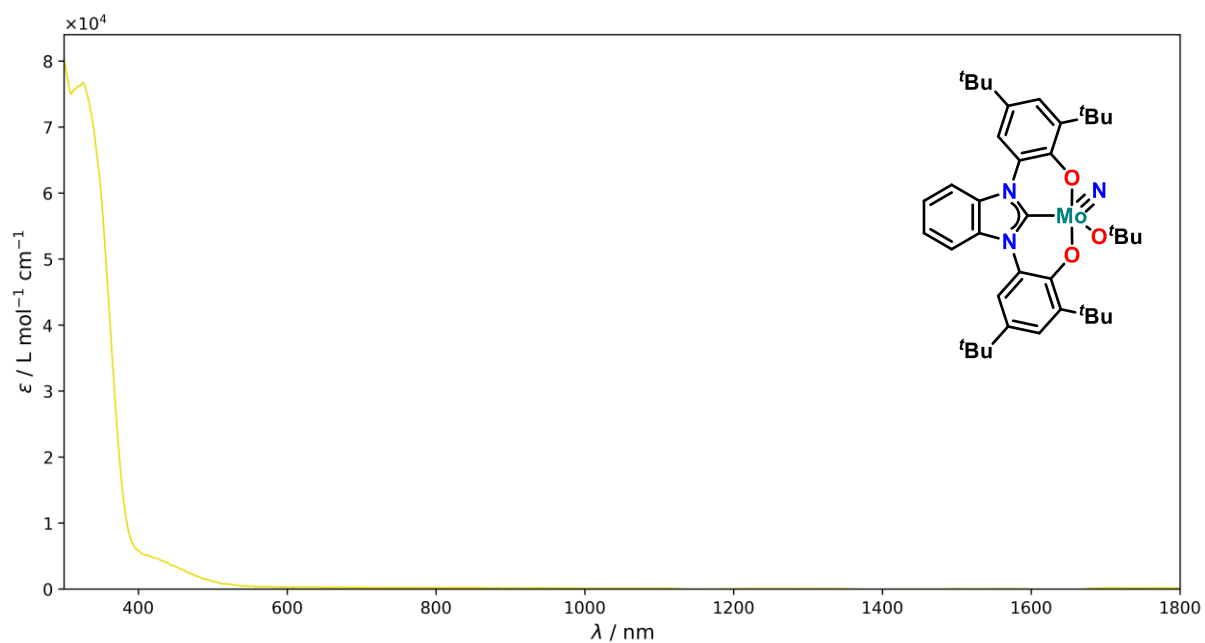

Figure S 100: UV-VIS-NIR spectrum of **2-O<sup>t</sup>Bu** in toluene at 298 K.

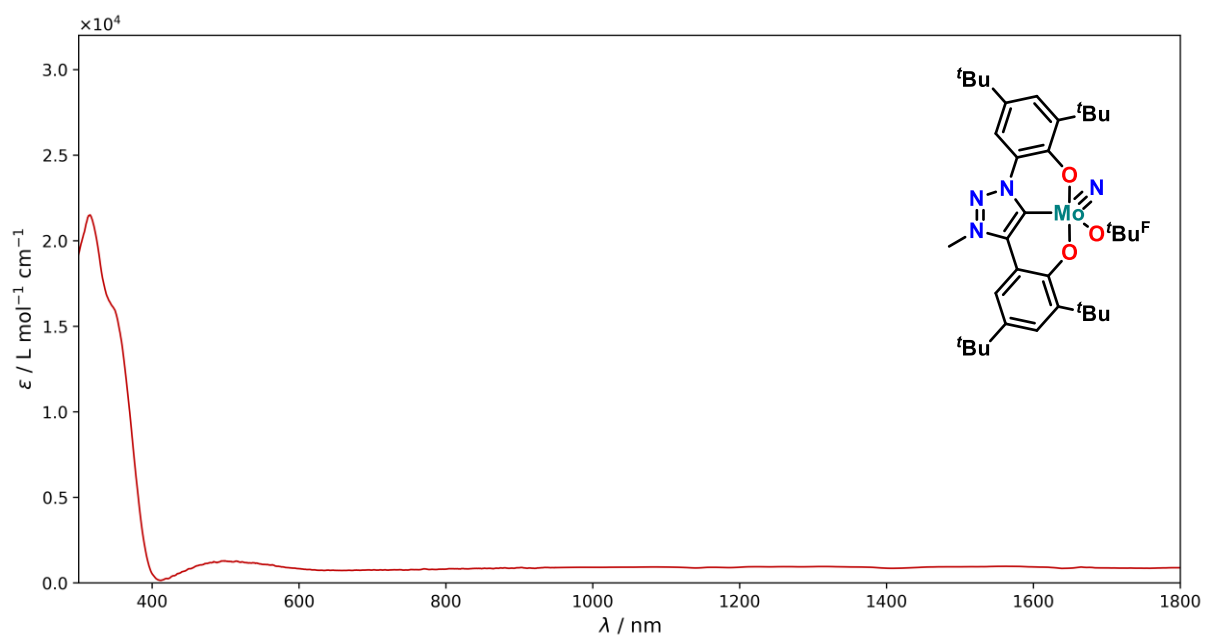

Figure S 101: UV-VIS-NIR spectrum of **1-O<sup>t</sup>Bu<sup>F</sup>** in toluene at 298 K.

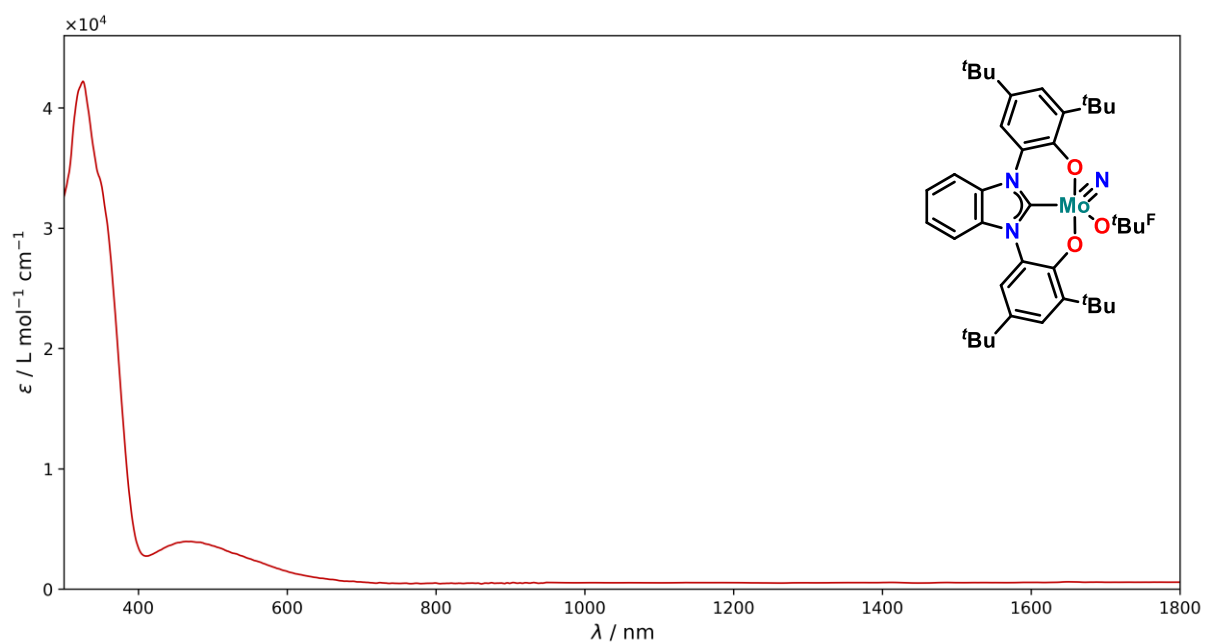

Figure S 102: UV-VIS-NIR spectrum of **2-O<sup>t</sup>Bu<sup>F</sup>** in toluene at 298 K.

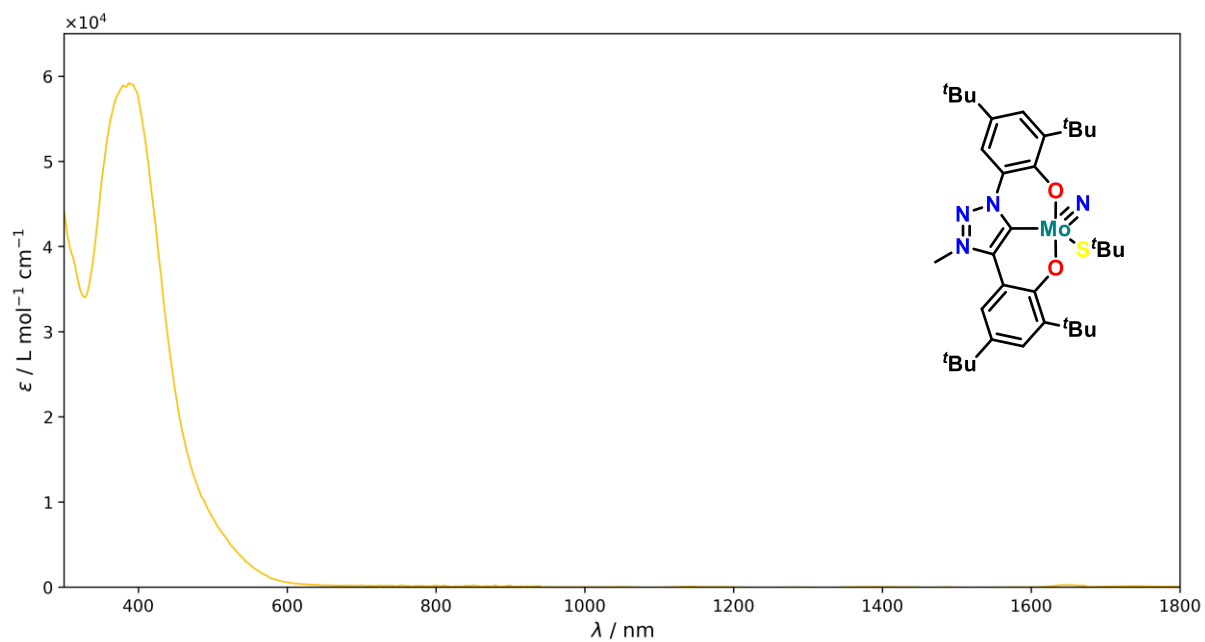

Figure S 103: UV-VIS-NIR spectrum of **1-S<sup>tBu</sup>** in toluene at 298 K.

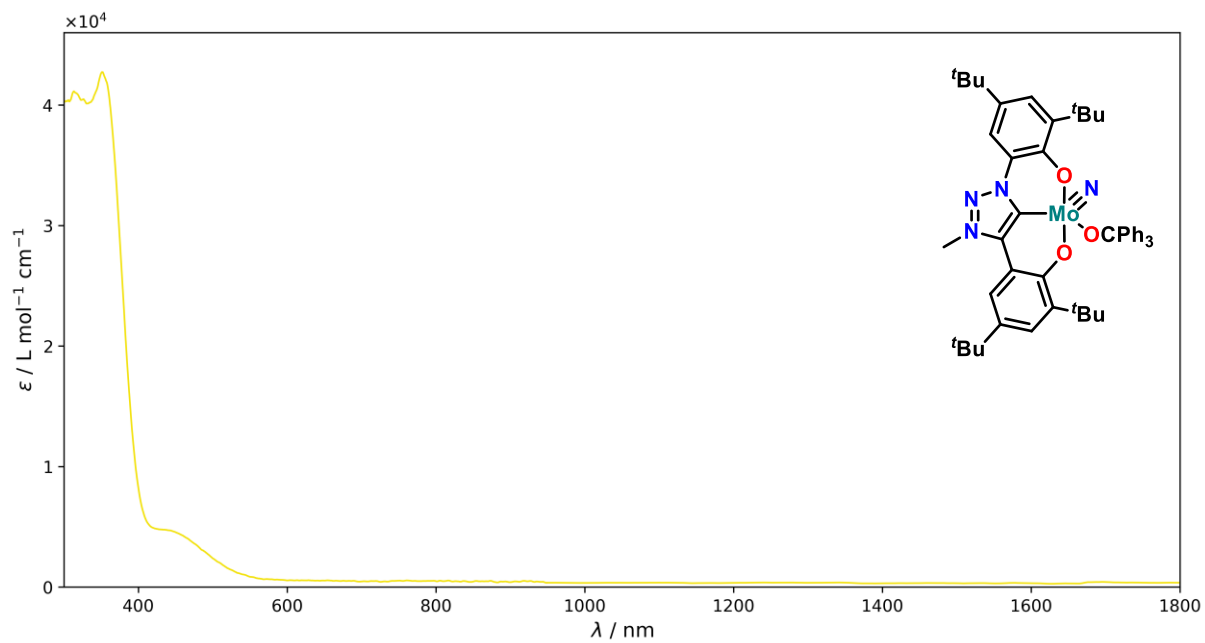

Figure S 104: UV-VIS-NIR spectrum of **1-OCPh<sub>3</sub>** in toluene at 298 K.

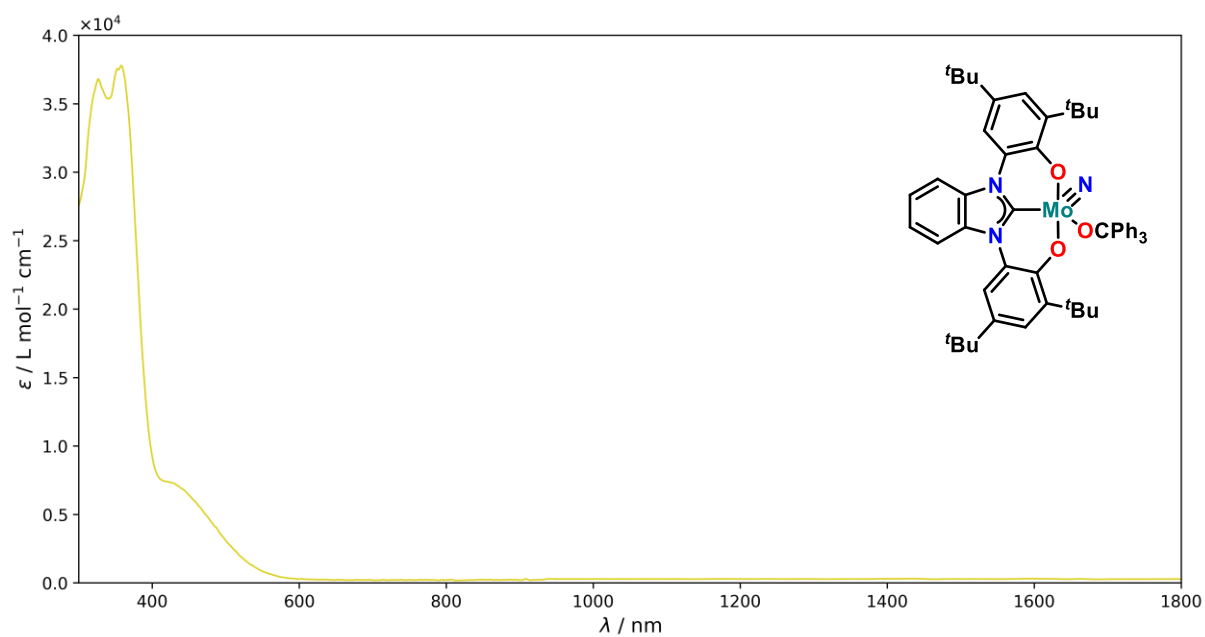

Figure S 105: UV-VIS-NIR spectrum of **2-OCPh<sub>3</sub>** in toluene at 298 K.

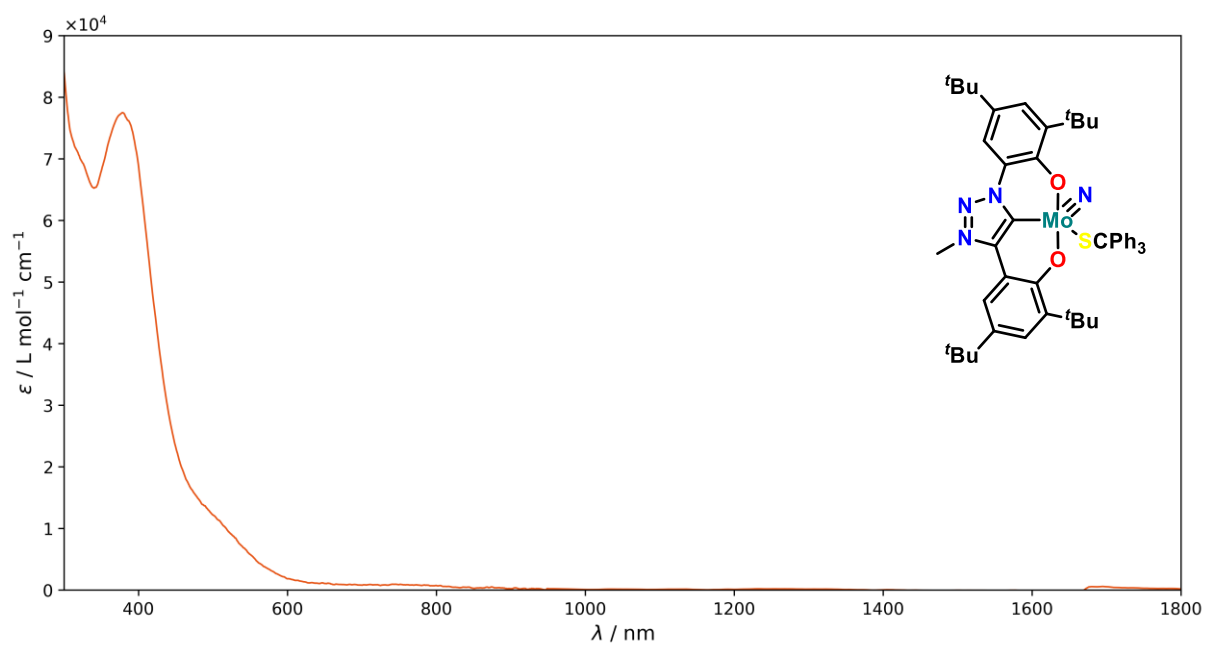

Figure S 106: UV-VIS-NIR spectrum of **1-SPh<sub>3</sub>** in toluene at 298 K.

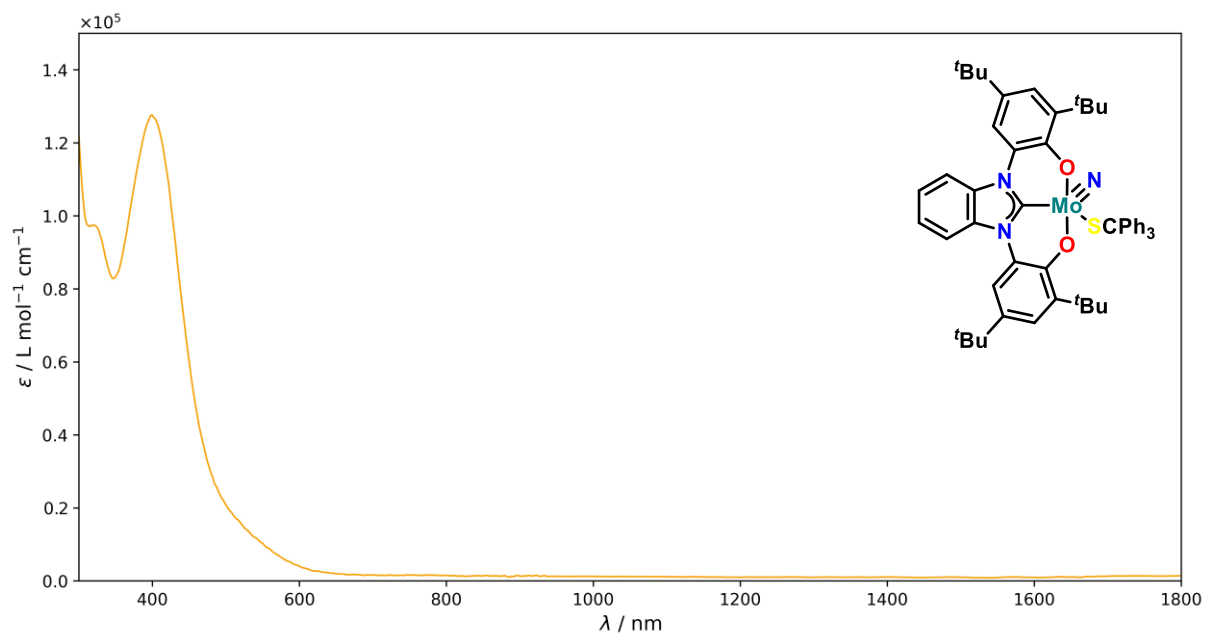

Figure S 107: UV-VIS-NIR spectrum of **2-SCPh<sub>3</sub>** in toluene at 298 K.

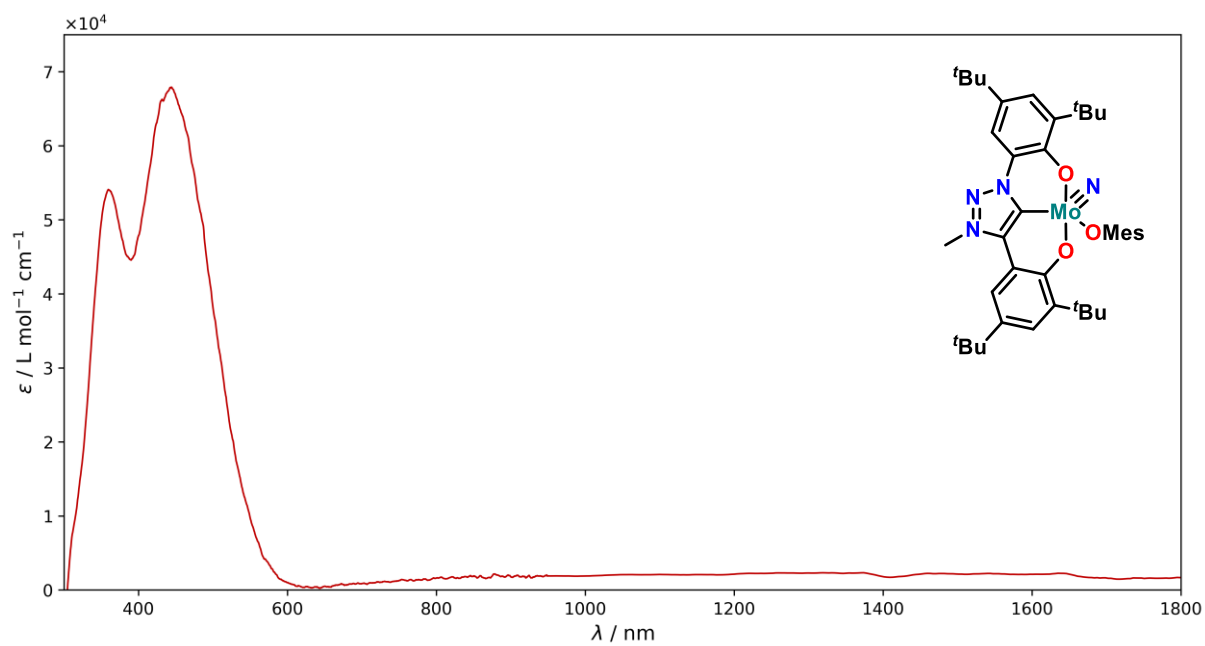

Figure S 108: UV-VIS-NIR spectrum of **1-OMes** in toluene at 298 K.



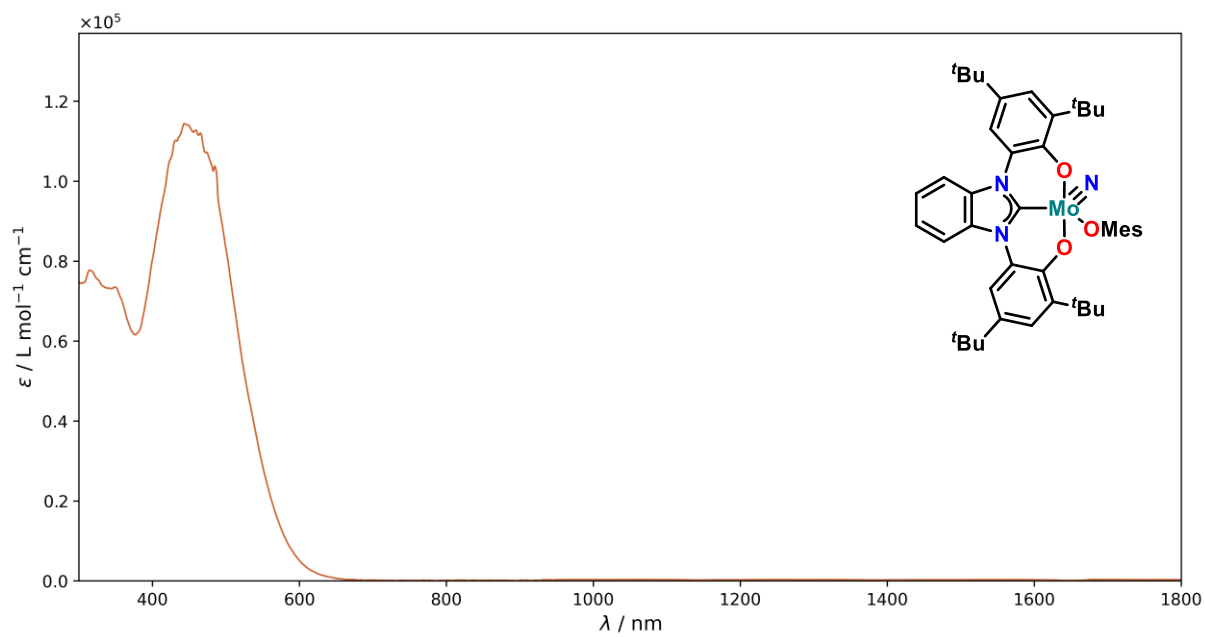

Figure S 109: UV-VIS-NIR spectrum of **2-OMes** in toluene at 298 K.

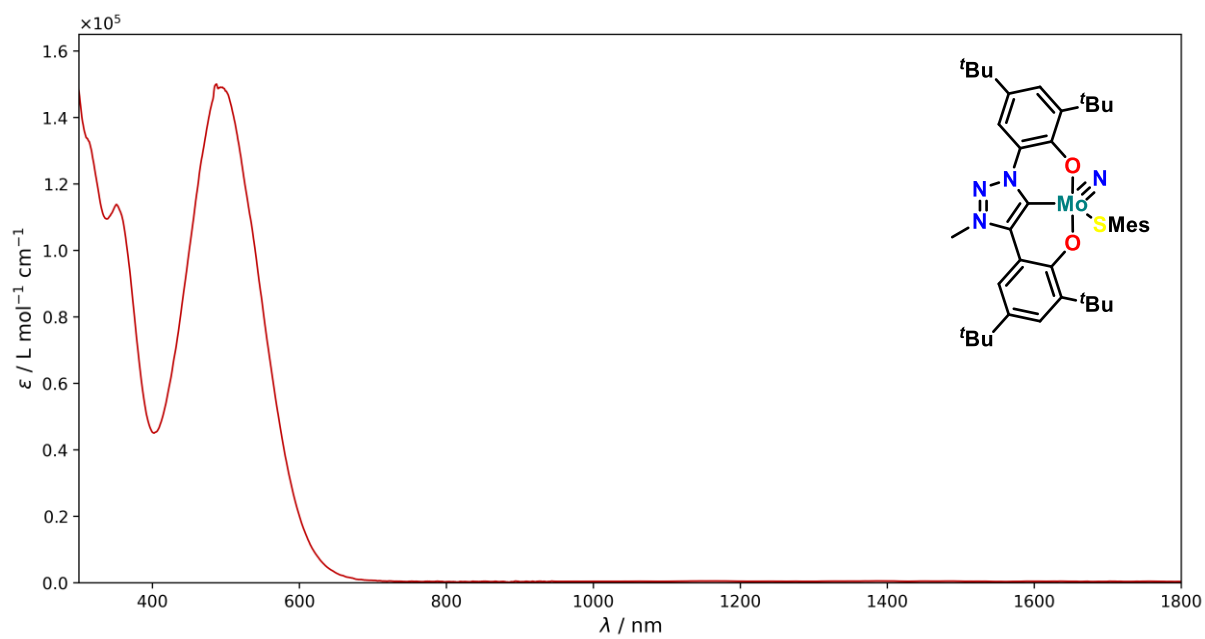

Figure S 110: UV-VIS-NIR spectrum of **1-SMes** in toluene at 298 K.

## 4. Cyclic Voltammetry

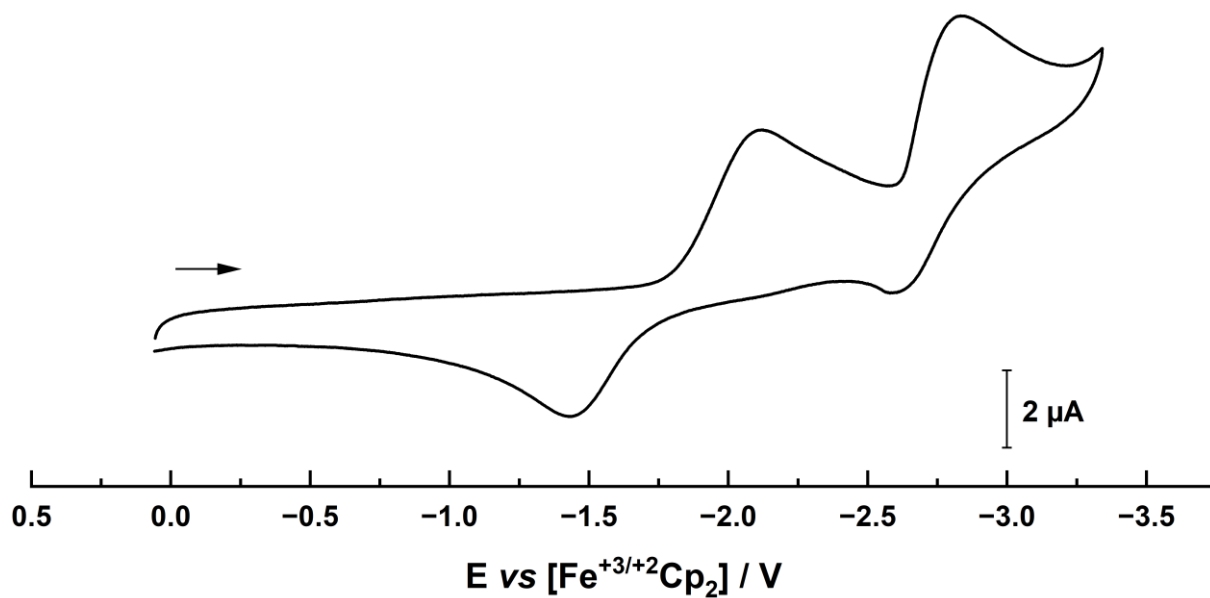

Figure S 111: Cyclic voltammogram of **1-O<sup>t</sup>Bu** in 0.15 M NBu<sub>4</sub>PF<sub>6</sub> THF solution at a scan rate of 100 mV s<sup>-1</sup>.

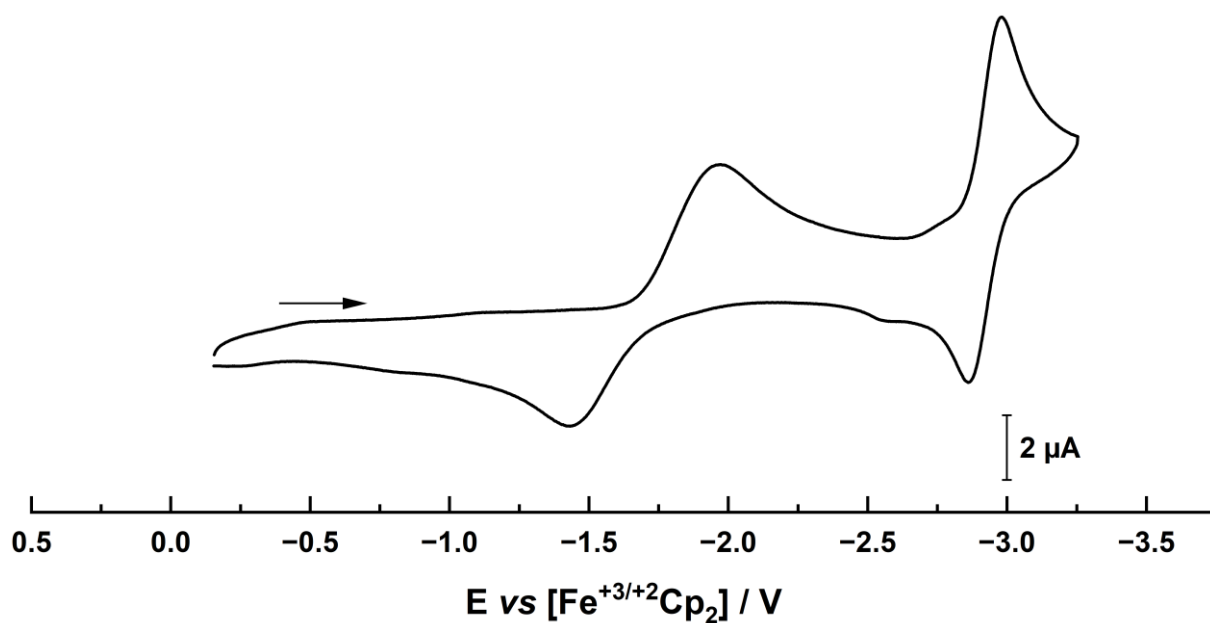

Figure S 112: Cyclic voltammogram of **2-O<sup>t</sup>Bu** in 0.15 M NBu<sub>4</sub>PF<sub>6</sub> THF solution at a scan rate of 100 mV s<sup>-1</sup>.

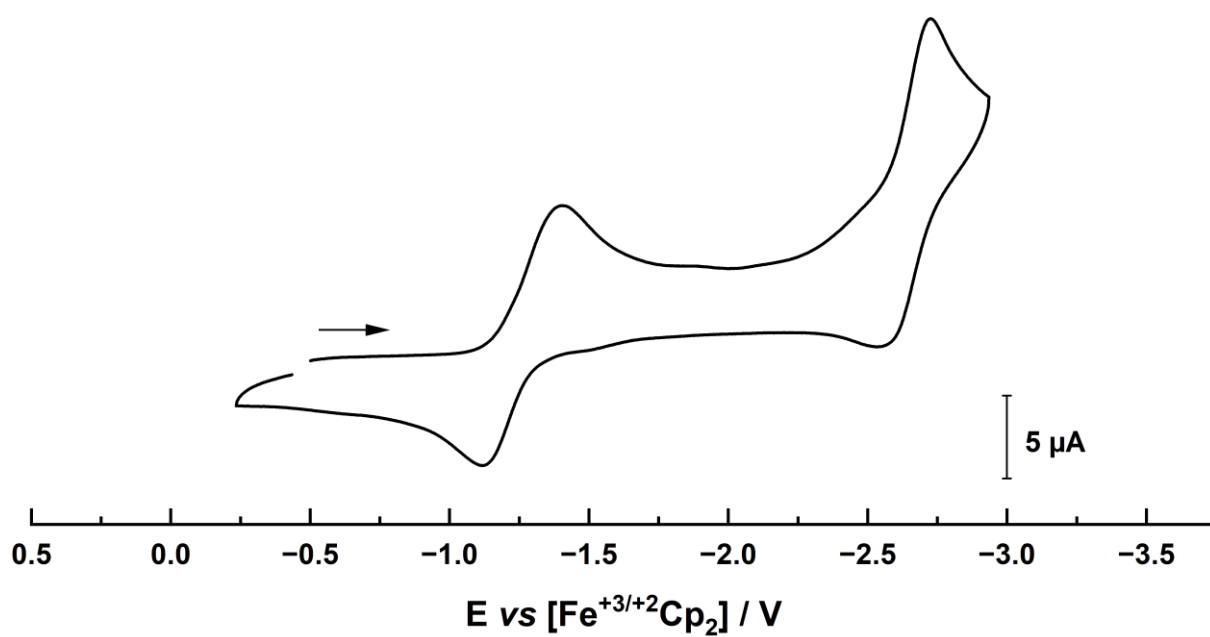

Figure S 113: Cyclic voltammogram of **1-O<sup>t</sup>BuF<sup>9</sup>** in 0.15 M  $\text{NBu}_4\text{PF}_6$  THF solution at a scan rate of  $100 \text{ mV s}^{-1}$ .

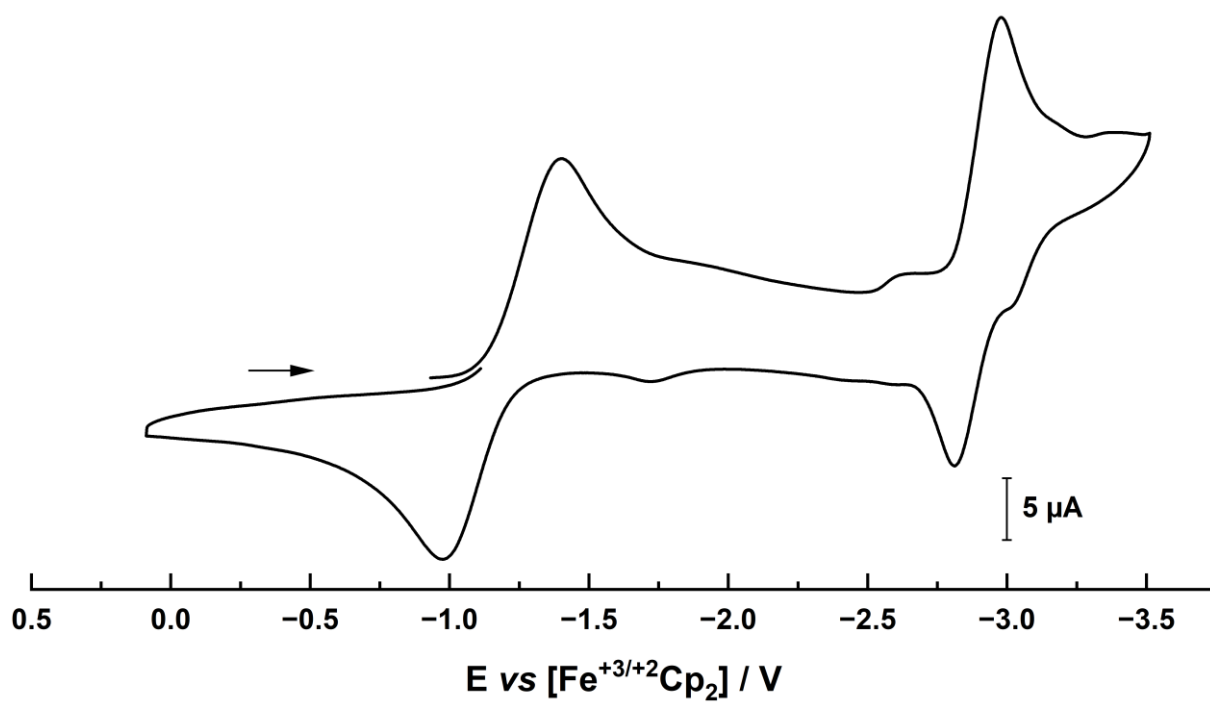

Figure S 114: Cyclic voltammogram of **2-O<sup>t</sup>BuF<sup>9</sup>** in 0.15 M  $\text{NBu}_4\text{PF}_6$  THF solution at a scan rate of  $100 \text{ mV s}^{-1}$ .

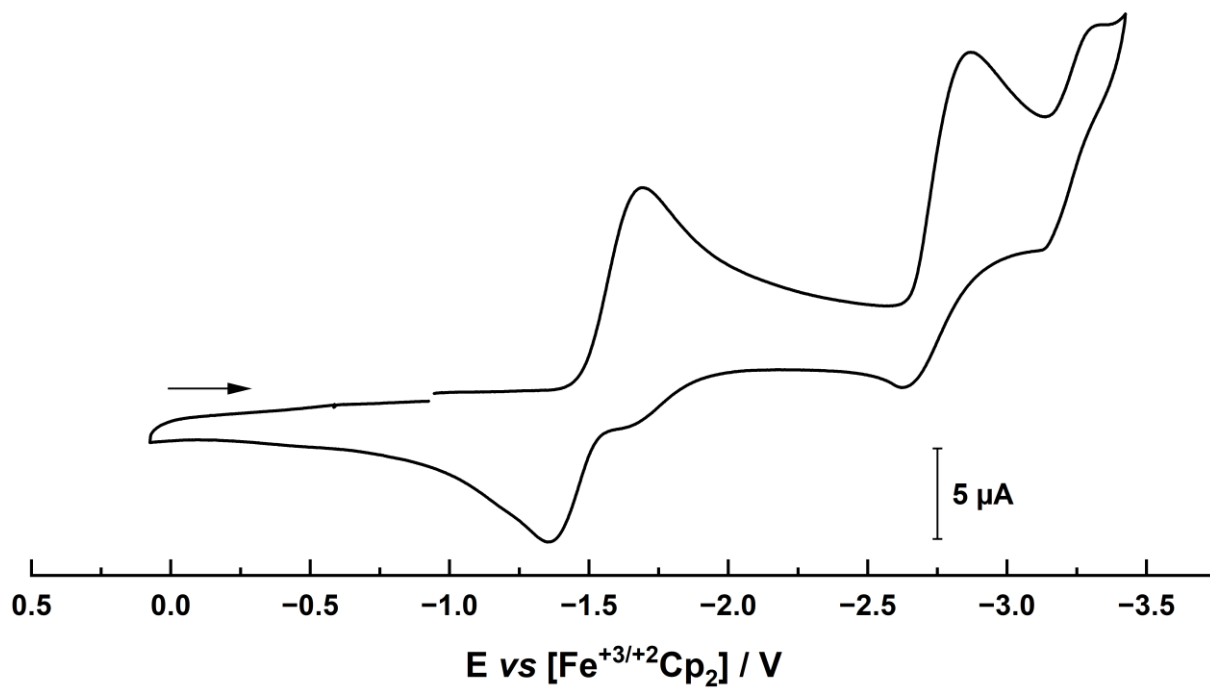

Figure S 115: Cyclic voltammogram of **1-S<sup>t</sup>Bu** in 0.15 M NBu<sub>4</sub>PF<sub>6</sub> THF solution at a scan rate of 100 mV s<sup>-1</sup>.

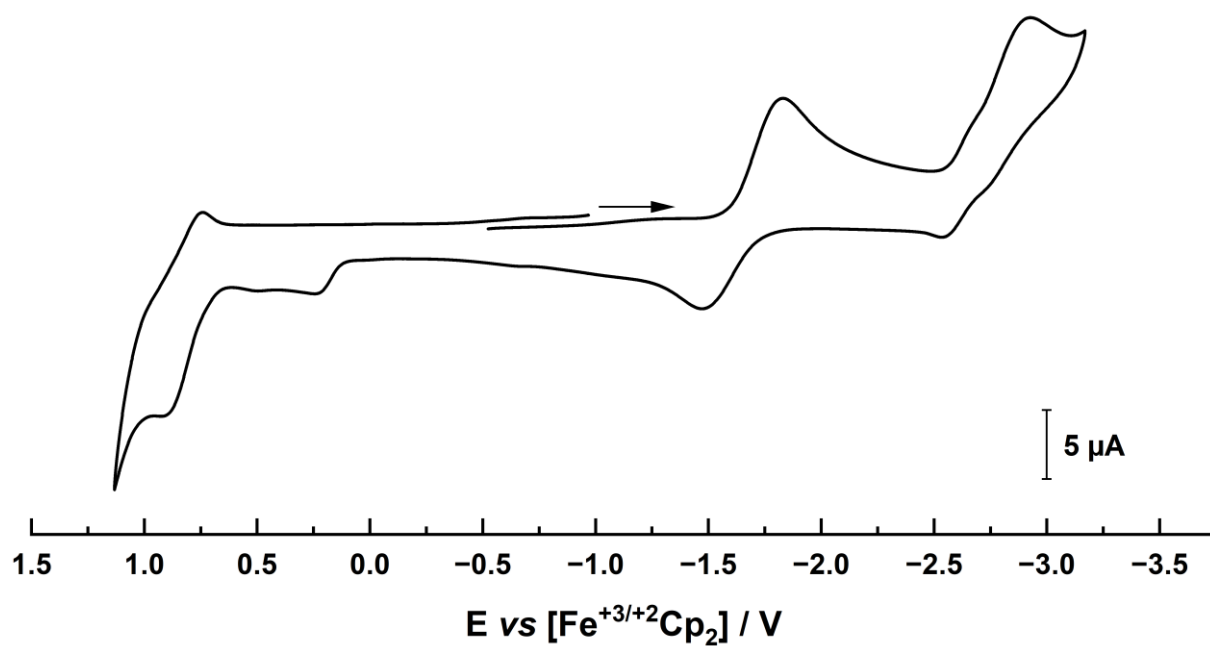

Figure S 116: Cyclic voltammogram of **1-OCPh<sub>3</sub>** in 0.15 M NBu<sub>4</sub>PF<sub>6</sub> THF solution at a scan rate of 100 mV s<sup>-1</sup>.

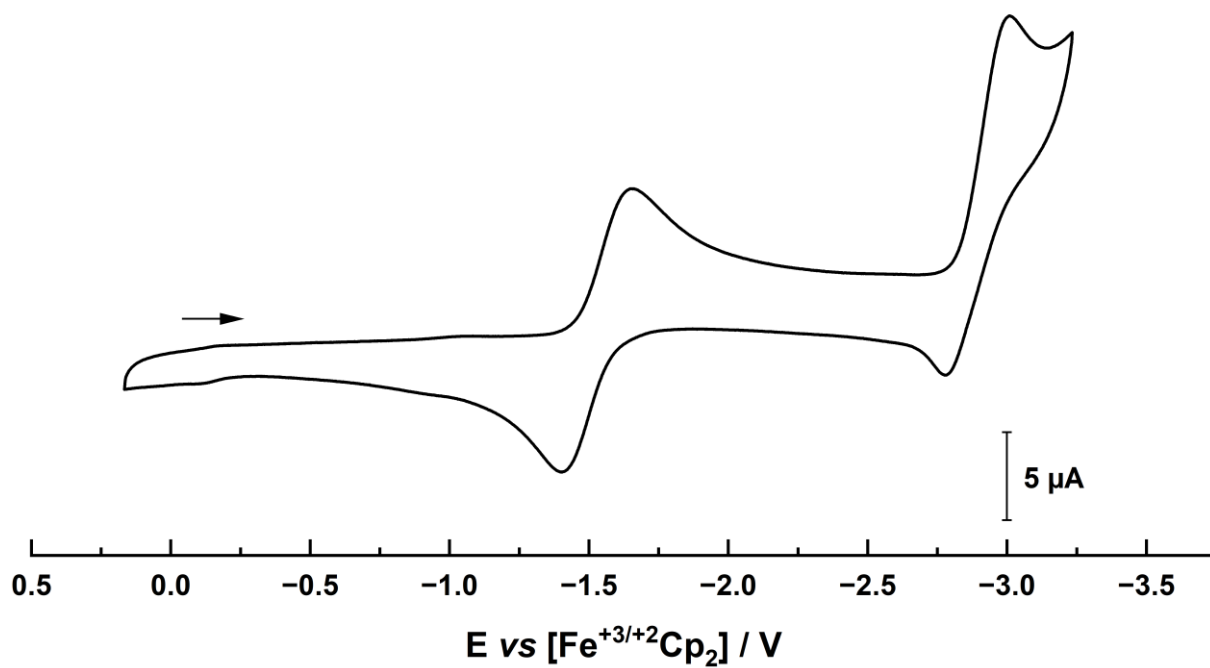

Figure S 117: Cyclic voltammogram of **2-OCPh<sub>3</sub>** in 0.15 M NBu<sub>4</sub>PF<sub>6</sub> THF solution at a scan rate of 100 mV s<sup>-1</sup>.

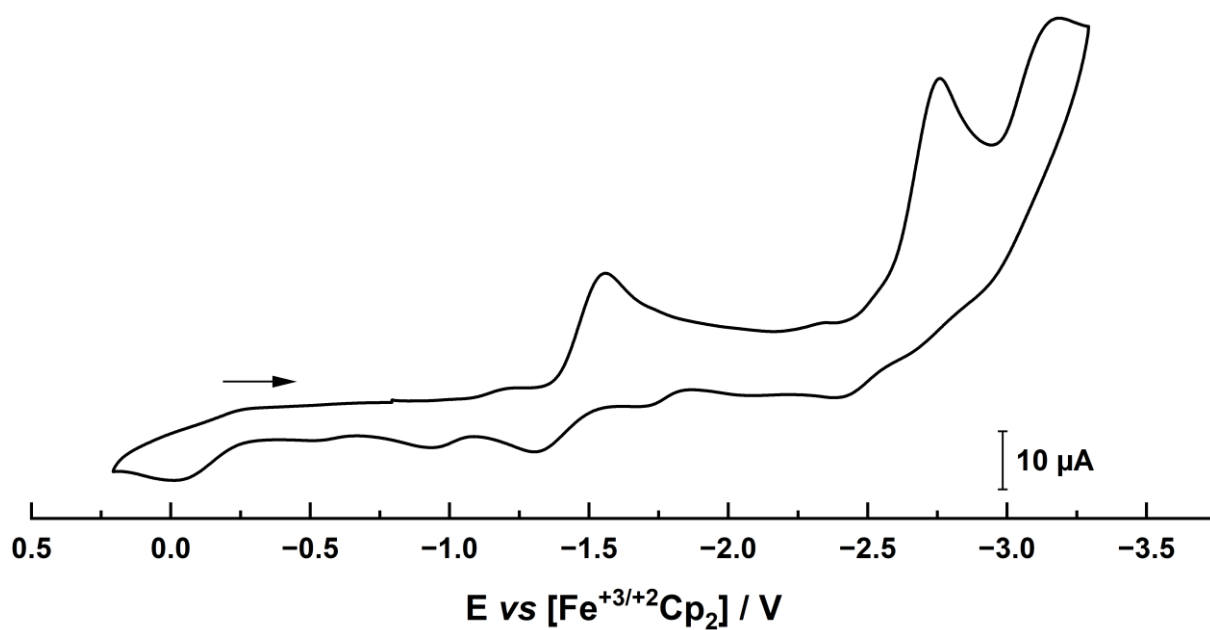

Figure S 118: Cyclic voltammogram of **1-SCPh<sub>3</sub>** in 0.15 M NBu<sub>4</sub>PF<sub>6</sub> THF solution at a scan rate of 100 mV s<sup>-1</sup>.

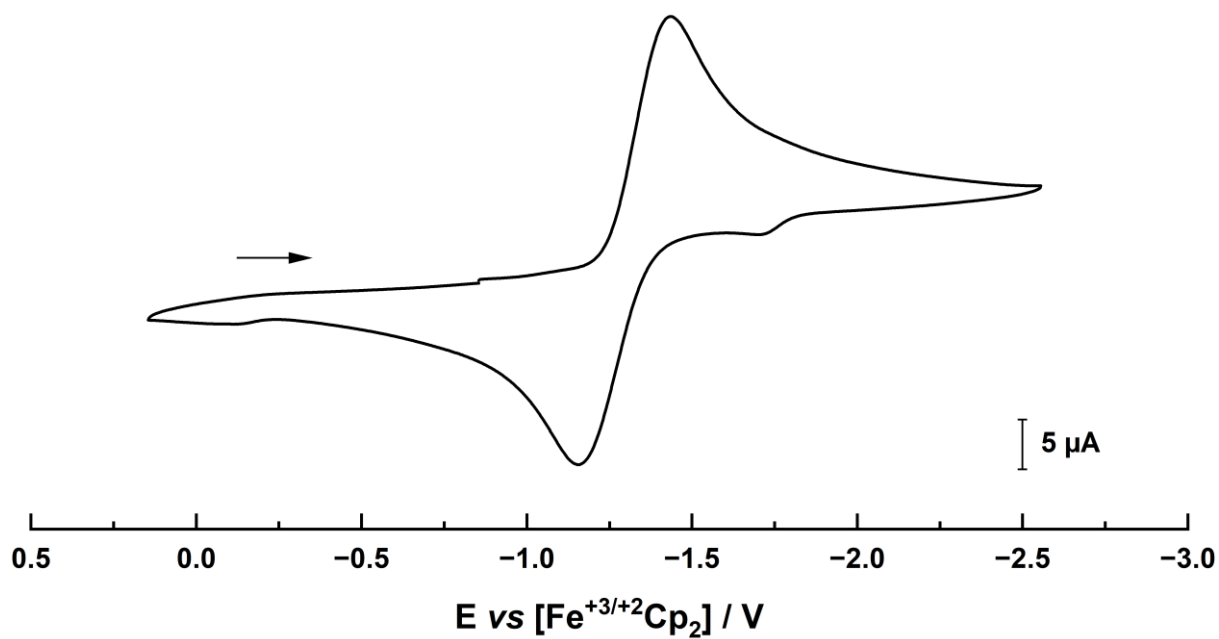

Figure S 119: Cyclic voltammogram of **2-SCPh<sub>3</sub>** in 0.15 M NBu<sub>4</sub>PF<sub>6</sub> THF solution at a scan rate of 100 mV s<sup>-1</sup>.

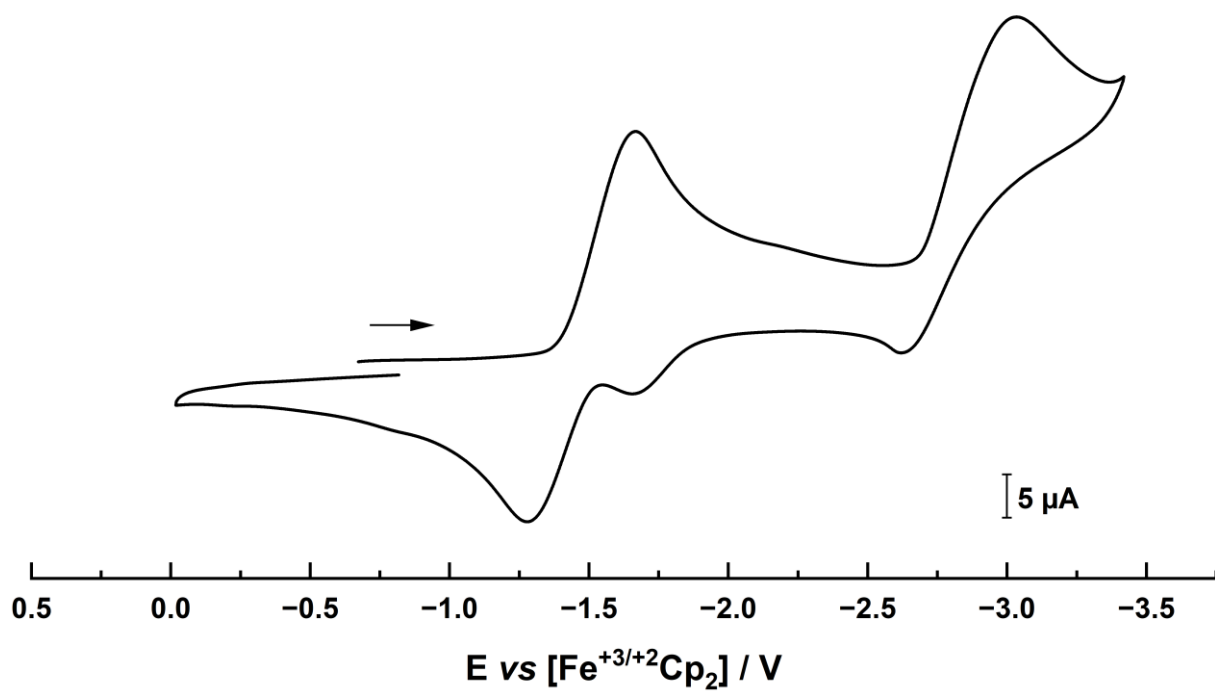

Figure S 120: Cyclic voltammogram of **1-OMes** in 0.15 M NBu<sub>4</sub>PF<sub>6</sub> THF solution at a scan rate of 100 mV s<sup>-1</sup>.

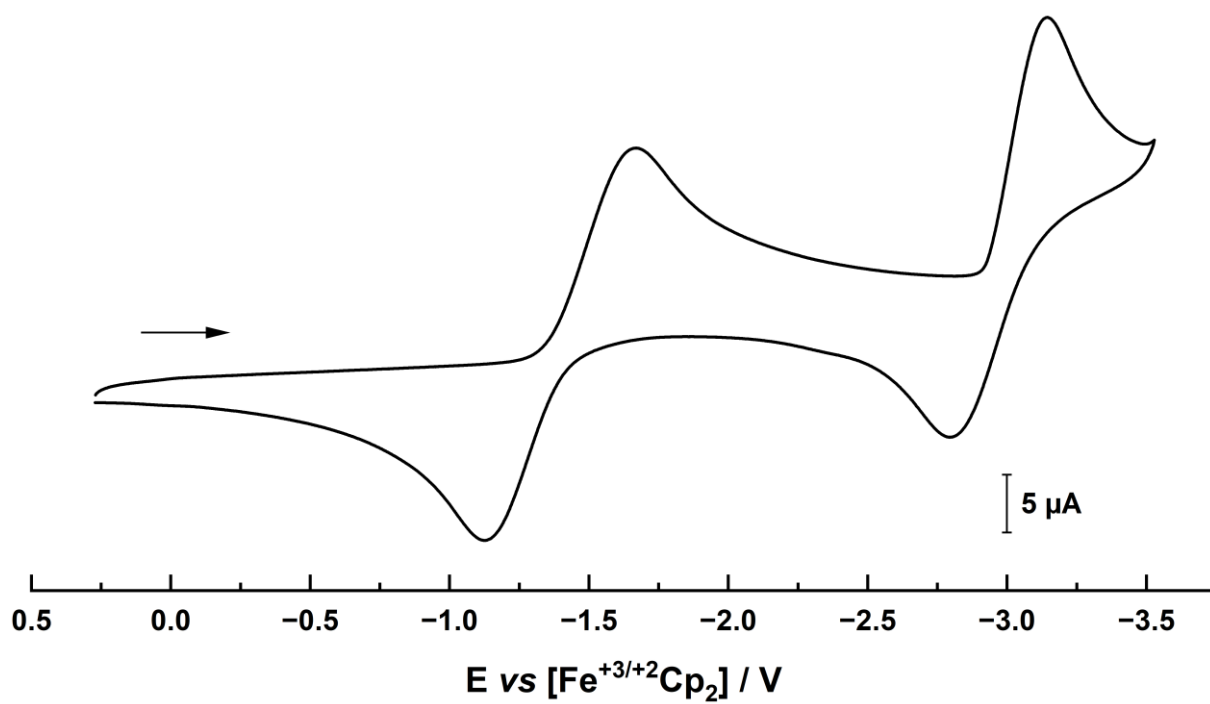

Figure S 121: Cyclic voltammogram of **2-OMes** in 0.15 M  $\text{NBu}_4\text{PF}_6$  THF solution at a scan rate of  $100 \text{ mV s}^{-1}$ .

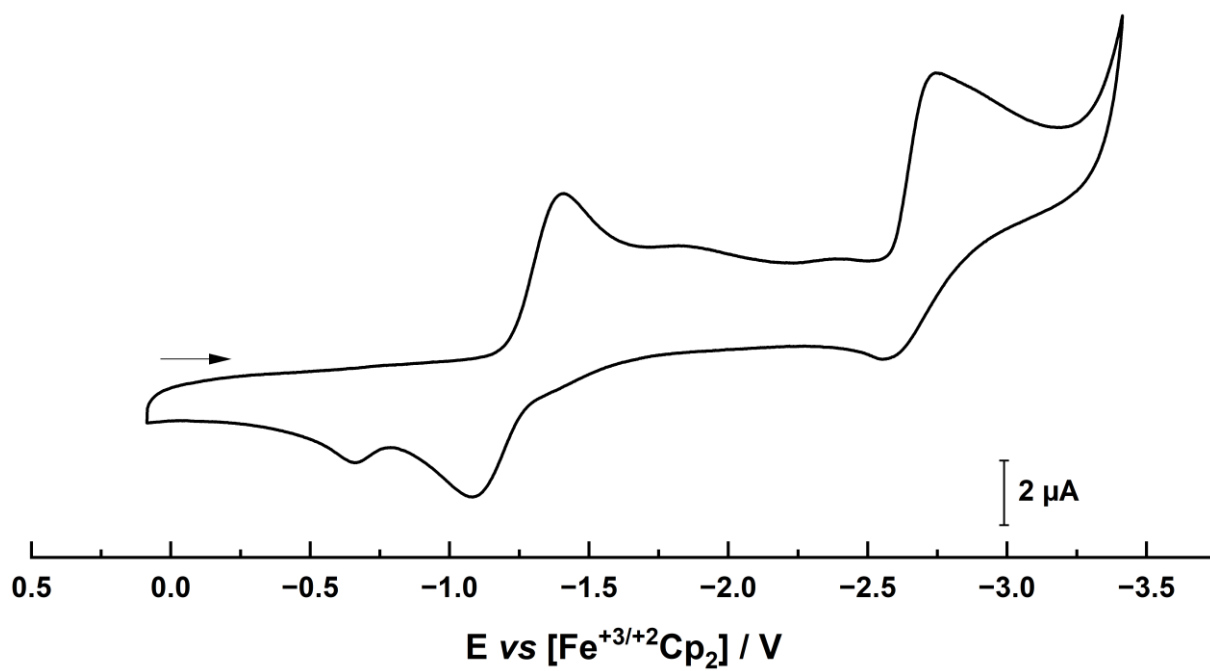

Figure S 122: Cyclic voltammogram of **1-SMes** in 0.15 M  $\text{NBu}_4\text{PF}_6$  THF solution at a scan rate of  $100 \text{ mV s}^{-1}$ .

## 5. Computational Details

Calculations were performed using the ORCA v5.0.4 software package.<sup>[1]</sup> Geometric parameters were optimized from the x-ray diffraction obtained structures on the ZORA-PBE-D3BJ level using the ZORA-def2-SVP basis set<sup>[2]</sup> for all atoms except molybdenum for which the all electron SARC-ZORA-TZVP set was used.<sup>[3]</sup> The final single point energy was calculated using the ZORA-def2-TZVP and SARC-ZORA-TZVPP basis sets for all other elements and molybdenum respectively. Scalar relativistic effects were modeled with the “Zeroth Order Regular Approximation” (ZORA).<sup>[4]</sup> The RI approximation was used with the SARC/J auxiliary basis set.<sup>[5]</sup> The optimized structures were verified as true minima by the absence of negative eigenvalues in the harmonic vibrational frequency analysis.

**1**

|    |          |          |           |
|----|----------|----------|-----------|
| Mo | 7.027779 | 7.171852 | 19.018112 |
| Cl | 8.870647 | 8.477580 | 18.125386 |
| O  | 7.931570 | 7.124924 | 20.877023 |
| O  | 6.668131 | 6.332661 | 17.170780 |
| N  | 6.322977 | 4.780053 | 20.938485 |
| N  | 5.811930 | 3.545200 | 21.050014 |
| N  | 5.645576 | 3.153317 | 19.775046 |
| N  | 5.677424 | 8.087360 | 19.324751 |
| C  | 6.464082 | 5.214058 | 19.638767 |
| C  | 6.065395 | 4.110897 | 18.859418 |
| C  | 5.871814 | 2.768972 | 16.735425 |
| H  | 5.772553 | 1.858923 | 17.327858 |
| C  | 5.840687 | 2.667245 | 15.343814 |
| C  | 6.074209 | 4.001732 | 17.407682 |
| C  | 6.660628 | 5.497555 | 22.119962 |
| C  | 6.264550 | 5.107647 | 15.190765 |
| C  | 6.345696 | 5.192718 | 16.631383 |
| C  | 6.228916 | 4.989149 | 23.360101 |
| H  | 5.620236 | 4.081673 | 23.345718 |
| C  | 6.016505 | 3.863848 | 14.605215 |
| H  | 5.975137 | 3.804514 | 13.511895 |
| C  | 7.481274 | 6.667435 | 22.017575 |
| C  | 6.482634 | 6.374779 | 14.342203 |
| C  | 7.379275 | 6.789423 | 24.458163 |
| H  | 7.653368 | 7.300796 | 25.387248 |
| C  | 6.580125 | 5.623919 | 24.553926 |
| C  | 5.630303 | 1.335423 | 14.603229 |
| C  | 7.830384 | 7.331935 | 23.249029 |
| C  | 5.447169 | 7.456219 | 14.738543 |
| H  | 4.418475 | 7.096002 | 14.551474 |
| H  | 5.606778 | 8.369731 | 14.134928 |
| H  | 5.539326 | 7.721451 | 15.803064 |
| C  | 8.665304 | 8.626083 | 23.199342 |
| C  | 6.137635 | 5.111067 | 25.934962 |
| C  | 7.882201 | 9.710096 | 22.417845 |



|   |           |           |           |
|---|-----------|-----------|-----------|
| H | 7.670421  | 9.387834  | 21.386502 |
| H | 8.472447  | 10.645244 | 22.374823 |
| H | 6.921341  | 9.930120  | 22.917650 |
| C | 10.025951 | 8.366633  | 22.507107 |
| H | 10.585385 | 7.569779  | 23.031983 |
| H | 10.639740 | 9.287512  | 22.527470 |
| H | 9.880442  | 8.067119  | 21.457392 |
| C | 7.918112  | 6.918065  | 14.555460 |
| H | 8.093302  | 7.224434  | 15.599711 |
| H | 8.084525  | 7.798595  | 13.905616 |
| H | 8.665006  | 6.148865  | 14.283779 |
| C | 5.318550  | 6.206352  | 26.657408 |
| H | 5.907340  | 7.130938  | 26.789424 |
| H | 4.998152  | 5.861671  | 27.659582 |
| H | 4.417154  | 6.467115  | 26.074342 |
| C | 8.952729  | 9.175341  | 24.610473 |
| H | 8.023689  | 9.425593  | 25.155459 |
| H | 9.547599  | 10.102902 | 24.525112 |
| H | 9.533054  | 8.460869  | 25.223956 |
| C | 5.264533  | 3.847627  | 25.829398 |
| H | 4.346775  | 4.037506  | 25.244558 |
| H | 4.960056  | 3.512681  | 26.838305 |
| H | 5.809997  | 3.016361  | 25.347588 |
| C | 4.953220  | 1.892834  | 19.590482 |
| H | 5.647259  | 1.080855  | 19.307194 |
| H | 4.181740  | 1.995530  | 18.810087 |
| H | 4.478866  | 1.641819  | 20.551440 |
| C | 6.307054  | 6.091601  | 12.837066 |
| H | 7.051285  | 5.365372  | 12.460271 |
| H | 6.446346  | 7.031451  | 12.272431 |
| H | 5.297071  | 5.706437  | 12.602321 |
| C | 7.387823  | 4.767829  | 26.779298 |
| H | 7.984936  | 3.980872  | 26.284682 |
| H | 7.098845  | 4.406520  | 27.785226 |
| H | 8.039896  | 5.649329  | 26.908443 |
| H | 4.407746  | 2.243339  | 13.009258 |
| C | 6.841936  | 1.053760  | 13.684040 |
| H | 6.703794  | 0.105844  | 13.128839 |
| H | 7.770772  | 0.977424  | 14.277309 |
| C | 5.480170  | 0.147525  | 15.571606 |
| H | 5.331935  | -0.788834 | 15.002752 |
| H | 4.609296  | 0.274284  | 16.240466 |
| H | 6.985755  | 1.861402  | 12.945125 |
| C | 4.347049  | 1.421125  | 13.743592 |
| H | 3.464134  | 1.609352  | 14.380585 |
| H | 4.180591  | 0.478977  | 13.186267 |
| H | 6.380684  | 0.019761  | 16.199494 |

2

|    |           |           |           |
|----|-----------|-----------|-----------|
| Mo | 3.135411  | 4.239936  | 7.508071  |
| Cl | 3.597551  | 2.950281  | 5.501103  |
| O  | 2.624647  | 2.455054  | 8.436086  |
| O  | 4.845016  | 5.348405  | 7.092467  |
| N  | 3.396110  | 4.045609  | 10.657877 |
| N  | 4.572153  | 5.743136  | 9.881405  |
| C  | 3.640382  | 4.794943  | 9.529628  |
| C  | 2.070542  | 2.242165  | 9.603360  |
| N  | 1.799758  | 5.203388  | 7.276896  |
| C  | 4.995569  | 5.543062  | 11.201056 |
| C  | 5.767202  | 7.533374  | 6.796141  |
| C  | 0.783929  | 0.264402  | 8.584746  |
| C  | 5.040435  | 6.775745  | 9.010793  |
| C  | 5.506524  | 4.516157  | 13.743444 |
| H  | 5.729279  | 4.115104  | 14.739546 |
| C  | 4.241630  | 4.448351  | 11.700344 |
| C  | 0.521741  | 1.002437  | 11.037203 |
| H  | -0.198549 | 0.188430  | 11.150703 |
| C  | 2.386907  | 3.037304  | 10.753594 |
| C  | 5.330178  | 8.040739  | 9.552198  |
| H  | 5.097158  | 8.217507  | 10.606106 |
| C  | 1.712028  | 2.864894  | 11.970951 |
| H  | 1.914207  | 3.571997  | 12.783480 |
| C  | 5.191614  | 6.498364  | 7.616149  |
| C  | 6.202909  | 10.458770 | 9.299610  |
| C  | 6.254209  | 5.606985  | 13.247400 |
| H  | 7.049957  | 6.042798  | 13.863500 |
| C  | 1.128706  | 1.171559  | 9.781672  |
| C  | 0.111893  | 1.108630  | 7.473032  |
| H  | -0.793631 | 1.610950  | 7.859284  |
| H  | -0.188750 | 0.454579  | 6.632246  |
| H  | 0.798859  | 1.875119  | 7.081024  |
| C  | 6.088566  | 8.760025  | 7.391270  |
| H  | 6.516148  | 9.544636  | 6.757354  |
| C  | 6.017565  | 6.129000  | 11.968048 |
| H  | 6.626650  | 6.942251  | 11.562810 |
| C  | 5.983227  | 7.274263  | 5.293098  |
| C  | 0.048191  | 1.689408  | 13.496966 |
| C  | 0.768378  | 1.840249  | 12.144974 |
| C  | -0.774632 | 2.966358  | 13.787803 |
| H  | -0.130014 | 3.862062  | 13.825610 |
| H  | -1.300382 | 2.884845  | 14.758774 |
| H  | -1.527842 | 3.133125  | 12.997211 |
| C  | 2.067521  | -0.395216 | 8.023341  |
| H  | 2.765625  | 0.370215  | 7.648572  |
| H  | 1.806154  | -1.069550 | 7.185831  |
| H  | 2.572676  | -0.995489 | 8.803072  |

|   |           |           |           |
|---|-----------|-----------|-----------|
| C | 4.498619  | 3.915719  | 12.975629 |
| H | 3.953890  | 3.039460  | 13.338736 |
| C | 5.865497  | 9.060347  | 8.755452  |
| C | 5.879855  | 10.591352 | 10.799021 |
| H | 4.805403  | 10.431252 | 11.000439 |
| H | 6.140235  | 11.605754 | 11.153345 |
| H | 6.452942  | 9.867254  | 11.406494 |
| C | 1.092292  | 1.490425  | 14.621286 |
| H | 1.696520  | 0.584162  | 14.435663 |
| H | 0.597826  | 1.383301  | 15.605915 |
| H | 1.784438  | 2.348713  | 14.685461 |
| C | -0.909728 | 0.484208  | 13.512279 |
| H | -1.703801 | 0.586143  | 12.751172 |
| H | -1.399254 | 0.403991  | 14.500449 |
| H | -0.374944 | -0.463800 | 13.322250 |
| C | 6.658241  | 8.472789  | 4.598238  |
| H | 6.039224  | 9.387657  | 4.649951  |
| H | 6.808969  | 8.234816  | 3.529582  |
| H | 7.649506  | 8.699576  | 5.033826  |
| C | 7.712545  | 10.735484 | 9.105118  |
| H | 8.318612  | 9.991406  | 9.652905  |
| H | 7.979533  | 11.743390 | 9.477310  |
| H | 8.000057  | 10.679358 | 8.040612  |
| C | 5.385238  | 11.524693 | 8.533140  |
| H | 5.596722  | 11.493268 | 7.450118  |
| H | 5.624201  | 12.542356 | 8.897711  |
| H | 4.302078  | 11.353006 | 8.665191  |
| C | 6.890486  | 6.035519  | 5.092649  |
| H | 7.868570  | 6.181334  | 5.588115  |
| H | 7.072421  | 5.874251  | 4.013053  |
| H | 6.408621  | 5.133887  | 5.503211  |
| C | -0.191597 | -0.860866 | 8.981671  |
| H | 0.224738  | -1.512223 | 9.772902  |
| H | -0.392980 | -1.494252 | 8.098621  |
| H | -1.162349 | -0.465562 | 9.334018  |
| C | 4.617403  | 7.025893  | 4.605612  |
| H | 4.132780  | 6.115961  | 4.992940  |
| H | 4.763959  | 6.899109  | 3.515904  |
| H | 3.937228  | 7.882110  | 4.765164  |

## 6. Crystallographic Information

Table S 1: Crystallographic Details of Complexes 1-Cl, 2-Cl, [1-Cl], [2-Cl], 3, 4, 1-OtBu, 2-OtBu and 1-OtBu<sup>F9</sup>.

|                                          | 1-Cl                                                              | 2-Cl                                                              | [1-Cl]                                                            | [2-Cl]                                                            | 3                                                                                             | 4                                                                                             | 1-OtBu                                                          | 2-OtBu                                                          | 1-OtBu <sup>F9</sup>                                                            |
|------------------------------------------|-------------------------------------------------------------------|-------------------------------------------------------------------|-------------------------------------------------------------------|-------------------------------------------------------------------|-----------------------------------------------------------------------------------------------|-----------------------------------------------------------------------------------------------|-----------------------------------------------------------------|-----------------------------------------------------------------|---------------------------------------------------------------------------------|
| Chemical Formula                         | C <sub>31</sub> H <sub>43</sub> ClMoN <sub>4</sub> O <sub>2</sub> | C <sub>35</sub> H <sub>44</sub> ClMoN <sub>3</sub> O <sub>2</sub> | C <sub>31</sub> H <sub>43</sub> ClMoN <sub>4</sub> O <sub>2</sub> | C <sub>35</sub> H <sub>44</sub> ClMoN <sub>3</sub> O <sub>2</sub> | C <sub>62</sub> H <sub>86</sub> Cl <sub>2</sub> Mo <sub>2</sub> N <sub>6</sub> O <sub>4</sub> | C <sub>70</sub> H <sub>88</sub> Cl <sub>2</sub> Mo <sub>2</sub> N <sub>4</sub> O <sub>4</sub> | C <sub>35</sub> H <sub>52</sub> MoN <sub>4</sub> O <sub>3</sub> | C <sub>39</sub> H <sub>53</sub> MoN <sub>3</sub> O <sub>3</sub> | C <sub>35</sub> H <sub>43</sub> N <sub>4</sub> O <sub>3</sub> F <sub>9</sub> Mo |
|                                          |                                                                   |                                                                   | C <sub>20</sub> H <sub>30</sub> Co                                | C <sub>20</sub> H <sub>30</sub> Co                                |                                                                                               |                                                                                               |                                                                 |                                                                 | C <sub>4</sub> H <sub>8</sub> O                                                 |
| M <sub>r</sub> (g mol <sup>-1</sup> )    | 0.5(C <sub>6</sub> H <sub>6</sub> )<br>674.14                     | 670.12                                                            | CH <sub>2</sub> Cl <sub>2</sub><br>1049.38                        | CH <sub>2</sub> Cl <sub>2</sub><br>1084.41                        | 0.75(C <sub>7</sub> H <sub>8</sub> )<br>1311.24                                               | 0.6[C <sub>4</sub> H <sub>10</sub> O]<br>1356.69                                              | 672.74                                                          | 707.78                                                          | 0.9 C <sub>4</sub> H <sub>10</sub> O<br>973.48                                  |
| Crystal System                           | orthorhombic                                                      | orthorhombic                                                      | orthorhombic                                                      | monoclinic                                                        | triclinic                                                                                     | triclinic                                                                                     | orthorhombic                                                    | orthorhombic                                                    | Monoclinic                                                                      |
| Space Group                              | C m c e                                                           | P b c a                                                           | P b c a                                                           | C 1 c 1                                                           | P -1                                                                                          | P -1                                                                                          | P b c m                                                         | P 21 21 21                                                      | P2 <sub>1</sub> /n                                                              |
| a (Å)                                    | 32.4454(15)                                                       | 13.7921(6)                                                        | 11.2229(8)                                                        | 19.5656(5)                                                        | 10.0665(10)                                                                                   | 13.0612(17)                                                                                   | 5.9259(3)                                                       | 5.8275(12)                                                      | 16.7763(10)                                                                     |
| b (Å)                                    | 9.7068(4)                                                         | 16.5408(8)                                                        | 18.4476(14)                                                       | 15.4251(4)                                                        | 10.9440(11)                                                                                   | 16.0524(18)                                                                                   | 19.4438(7)                                                      | 19.533(4)                                                       | 10.5017(6)                                                                      |
| c (Å)                                    | 21.5529(9)                                                        | 29.0621(13)                                                       | 51.454(4)                                                         | 19.5452(5)                                                        | 30.514(3)                                                                                     | 18.038(2)                                                                                     | 31.0776(13)                                                     | 31.857(7)                                                       | 28.0439(18)                                                                     |
| α (°)                                    | 90                                                                | 90                                                                | 90                                                                | 90                                                                | 90.214(4)                                                                                     | 103.777(6)                                                                                    | 90                                                              | 90                                                              | 90                                                                              |
| β (°)                                    | 90                                                                | 90                                                                | 90                                                                | 112.7890(10)                                                      | 97.829(4)                                                                                     | 100.008(6)                                                                                    | 90                                                              | 90                                                              | 96.409(2)                                                                       |
| γ (°)                                    | 90                                                                | 90                                                                | 90                                                                | 90                                                                | 94.020(4)                                                                                     | 104.777(6)                                                                                    | 90                                                              | 90                                                              | 90                                                                              |
| V (Å <sup>3</sup> )                      | 6787.9(5)                                                         | 6630.0(5)                                                         | 10652.8(13)                                                       | 5438.3(2)                                                         | 3321.8(6)                                                                                     | 3439.1(7)                                                                                     | 3580.8(3)                                                       | 3626.2(13)                                                      | 4909.9(5)                                                                       |
| Z                                        | 8                                                                 | 8                                                                 | 8                                                                 | 4                                                                 | 2                                                                                             | 2                                                                                             | 4                                                               | 4                                                               | 4                                                                               |
| Density (g cm <sup>-3</sup> )            | 1.319                                                             | 1.343                                                             | 1.309                                                             | 1.324                                                             | 1.311                                                                                         | 1.310                                                                                         | 1.248                                                           | 1.296                                                           | 1.317                                                                           |
| F(000)                                   | 2824                                                              | 2800                                                              | 4408                                                              | 2276                                                              | 1375                                                                                          | 1422                                                                                          | 1424                                                            | 1496                                                            | 2023                                                                            |
| Radiation Type                           | MoKα                                                              | MoKα                                                              | MoKα                                                              | MoKα                                                              | MoKα                                                                                          | MoKα                                                                                          | MoKα                                                            | MoKα                                                            | MoKα                                                                            |
| μ (mm <sup>-1</sup> )                    | 0.500                                                             | 0.511                                                             | 0.738                                                             | 0.725                                                             | 0.508                                                                                         | 0.493                                                                                         | 0.403                                                           | 0.401                                                           | 0.344                                                                           |
| Crystal Size (mm)                        | 0.48x0.11x0.09                                                    | 0.35x0.32x0.02                                                    | 0.4x0.38x0.25                                                     | 0.05x0.04x0.02                                                    | 0.15x0.11x0.04                                                                                | 0.35x0.01x0.005                                                                               | 0.25x0.1x0.08                                                   | 0.13x0.02x0.01                                                  | 0.10x0.08x0.01                                                                  |
| Meas. Refl.                              | 69352                                                             | 95100                                                             | 66020                                                             | 78827                                                             | 13717                                                                                         | 45614                                                                                         | 39210                                                           | 35165                                                           | 67721                                                                           |
| Indep. Refl.                             | 3069                                                              | 6071                                                              | 10874                                                             | 10329                                                             | 13717                                                                                         | 12246                                                                                         | 3746                                                            | 6425                                                            | 8700                                                                            |
| Obsvd. [ <i>I</i> > 2σ( <i>I</i> )]      | 2605                                                              | 5020                                                              | 8776                                                              | 10139                                                             | 12646                                                                                         | 6189                                                                                          | 3286                                                            | 3816                                                            | 6362                                                                            |
| R <sub>int</sub>                         | 0.0789                                                            | 0.0620                                                            | 0.0560                                                            | 0.0480                                                            | ?                                                                                             | 0.2026                                                                                        | 0.0540                                                          | 0.2076                                                          | 0.1059                                                                          |
| R [F <sup>2</sup> > 2σ(F <sup>2</sup> )] | 0.0377                                                            | 0.0311                                                            | 0.0437                                                            | 0.0212                                                            | 0.0776                                                                                        | 0.0718                                                                                        | 0.0275                                                          | 0.0673                                                          | 0.0492                                                                          |
| wR(F <sup>2</sup> )                      | 0.1021                                                            | 0.0774                                                            | 0.0980                                                            | 0.0516                                                            | 0.2007                                                                                        | 0.1879                                                                                        | 0.0671                                                          | 0.1459                                                          | 0.1407                                                                          |
| S                                        | 1.134                                                             | 1.100                                                             | 1.082                                                             | 1.048                                                             | 1.144                                                                                         | 0.922                                                                                         | 1.067                                                           | 0.985                                                           | 1.044                                                                           |
| Δρ <sub>max</sub>                        | 1.427                                                             | 0.782                                                             | 0.738                                                             | 0.399                                                             | 1.578                                                                                         | 0.709                                                                                         | 0.263                                                           | 0.653                                                           | 0.475                                                                           |
| Δρ <sub>min</sub>                        | -0.598                                                            | -0.519                                                            | -0.534                                                            | -0.296                                                            | -1.559                                                                                        | -0.866                                                                                        | -0.358                                                          | -0.378                                                          | -0.894                                                                          |
| CCDC                                     | 2364769                                                           | 2364763                                                           | 1364770                                                           | 2364765                                                           | 2364775                                                                                       | 2364773                                                                                       | 2364774                                                         | 2364760                                                         | 2364772                                                                         |

Table S 2: Crystallographic Details of Complexes 1-R (R = *S*<sup>t</sup>Bu, SCPh<sub>3</sub>, OMe<sub>s</sub>, SMes) and 2-R (R = *O*tBu<sup>F9</sup>, OCPH<sub>3</sub>, OMe<sub>s</sub>, SMes).

|                                                                          | 2- <i>O</i> <sup>t</sup> Bu <sup>F9</sup>                                                                          | 1- <i>S</i> <sup>t</sup> Bu                                       | 2-OCPh <sub>3</sub>                                              | 1-SCPh <sub>3</sub>                                               | 1-OMe <sub>s</sub>                                               | 2-OMe <sub>s</sub>                                               | 1-SMe <sub>s</sub>                                                | 2-SMe <sub>s</sub>                                                |
|--------------------------------------------------------------------------|--------------------------------------------------------------------------------------------------------------------|-------------------------------------------------------------------|------------------------------------------------------------------|-------------------------------------------------------------------|------------------------------------------------------------------|------------------------------------------------------------------|-------------------------------------------------------------------|-------------------------------------------------------------------|
| Chemical Formula                                                         | C <sub>39</sub> H <sub>44</sub> N <sub>3</sub> O <sub>3</sub> F <sub>9</sub> Mo<br>C <sub>4</sub> H <sub>8</sub> O | C <sub>35</sub> H <sub>52</sub> N <sub>4</sub> O <sub>2</sub> SMo | C <sub>54</sub> H <sub>59</sub> N <sub>3</sub> O <sub>3</sub> Mo | C <sub>50</sub> H <sub>58</sub> N <sub>4</sub> O <sub>2</sub> SMo | C <sub>40</sub> H <sub>54</sub> N <sub>4</sub> O <sub>3</sub> Mo | C <sub>44</sub> H <sub>55</sub> N <sub>3</sub> O <sub>3</sub> Mo | C <sub>40</sub> H <sub>54</sub> N <sub>4</sub> O <sub>2</sub> SMo | C <sub>44</sub> H <sub>55</sub> N <sub>3</sub> O <sub>2</sub> SMo |
| <i>M<sub>r</sub></i> (g mol <sup>-1</sup> )                              | 986.28                                                                                                             | 703.16                                                            | 980.55                                                           | 875.00                                                            | 851.97                                                           | 769.85                                                           | 837.04                                                            | 858.05                                                            |
| Crystal System                                                           | Orthorhombic                                                                                                       | Triclinic                                                         | Monoclinic                                                       | Triclinic                                                         | Triclinic                                                        | Monoclinic                                                       | Triclinic                                                         | Trigonal                                                          |
| Space Group                                                              | <i>Pn</i> nm                                                                                                       | <i>P</i> -1                                                       | <i>P</i> 2 <sub>1</sub> / <i>c</i>                               | <i>P</i> 1                                                        | <i>P</i> -1                                                      | <i>C</i> <sub>2</sub> / <i>c</i>                                 | <i>P</i> -1                                                       | <i>R</i> -3                                                       |
| <i>a</i> (Å)                                                             | 23.4925(19)                                                                                                        | 19.0492(14)                                                       | 13.5078(7)                                                       | 9.3240(16)                                                        | 12.3406(6)                                                       | 33.202(4)                                                        | 16.754(2)                                                         | 37.041(2)                                                         |
| <i>b</i> (Å)                                                             | 9.8772(9)                                                                                                          | 19.4669(16)                                                       | 28.4083(15)                                                      | 11.1134(18)                                                       | 13.6168(7)                                                       | 13.0643(10)                                                      | 17.595(2)                                                         | 37.041(2)                                                         |
| <i>c</i> (Å)                                                             | 20.6824(15)                                                                                                        | 20.4769(17)                                                       | 13.9736(7)                                                       | 23.386(4)                                                         | 15.6475(9)                                                       | 18.5211(17)                                                      | 18.362(2)                                                         | 21.5515(16)                                                       |
| $\alpha$ (°)                                                             | 90                                                                                                                 | 102.384(4)                                                        | 90                                                               | 81.921(5)                                                         | 95.467(2)                                                        | 90                                                               | 65.177(59)                                                        | 90                                                                |
| $\beta$ (°)                                                              | 90                                                                                                                 | 115.020(3)                                                        | 95.292(2)                                                        | 85.646(5)                                                         | 107.910(2)                                                       | 93.051(3)                                                        | 68.890(5)                                                         | 90                                                                |
| $\gamma$ (°)                                                             | 90                                                                                                                 | 101.929(4)                                                        | 90                                                               | 86.098(5)                                                         | 109.900(2)                                                       | 90                                                               | 81.949(5)                                                         | 120                                                               |
| <i>V</i> (Å <sup>3</sup> )                                               | 4799.1(7)                                                                                                          | 6330.0(9)                                                         | 5339.3(5)                                                        | 2388.2(7)                                                         | 2293.1(2)                                                        | 8022.4(13)                                                       | 4582.7(10)                                                        | 25608(3)                                                          |
| <i>Z</i>                                                                 | 4                                                                                                                  | 6                                                                 | 4                                                                | 2                                                                 | 2                                                                | 8                                                                | 4                                                                 | 18                                                                |
| Density (g cm <sup>-3</sup> )                                            | 1.365                                                                                                              | 1.107                                                             | 1.220                                                            | 1.217                                                             | 1.234                                                            | 1.275                                                            | 1.213                                                             | 1.002                                                             |
| <i>F</i> (000)                                                           | 2045                                                                                                               | 2234                                                              | 2082                                                             | 920                                                               | 902                                                              | 3248                                                             | 1784                                                              | 8208                                                              |
| Radiation Type                                                           | MoK $\alpha$                                                                                                       | MoK $\alpha$                                                      | MoK $\alpha$                                                     | MoK $\alpha$                                                      | MoK $\alpha$                                                     | MoK $\alpha$                                                     | MoK $\alpha$                                                      | MoK $\alpha$                                                      |
| $\mu$ (mm <sup>-1</sup> )                                                | 0.353                                                                                                              | 0.391                                                             | 0.292                                                            | 0.359                                                             | 0.330                                                            | 0.369                                                            | 0.371                                                             | 0.300                                                             |
| Crystal Size (mm)                                                        | 0.24x0.19x0.02                                                                                                     | 0.02x0.01x0.005                                                   | 0.10x0.09x0.05                                                   | 0.20x0.19x0.01                                                    | 0.25x0.23x0.08                                                   | 0.25x0.20x0.04                                                   | 0.08x0.04x0.02                                                    | 0.34x0.21x0.18                                                    |
| Meas. Refl.                                                              | 100217                                                                                                             | 135451                                                            | 107140                                                           | 16723                                                             | 78746                                                            | 44014                                                            | 75311                                                             | 242159                                                            |
| Indep. Refl.                                                             | 4844                                                                                                               | 22463                                                             | 9449                                                             | 16723                                                             | 9426                                                             | 8212                                                             | 16173                                                             | 12577                                                             |
| Obsvd. [ <i>I</i> > 2 $\sigma$ ( <i>I</i> )]                             | 3665                                                                                                               | 10622                                                             | 7267                                                             | 15095                                                             | 7786                                                             | 5487                                                             | 8411                                                              | 8512                                                              |
| <i>R</i> <sub>int</sub>                                                  | 0.1261                                                                                                             | 0.2740                                                            | 0.0806                                                           | -                                                                 | 0.0968                                                           | 0.1445                                                           | 0.1975                                                            | 0.1711                                                            |
| <i>R</i> [ <i>F</i> <sup>2</sup> > 2 $\sigma$ ( <i>F</i> <sup>2</sup> )] | 0.0543                                                                                                             | 0.0716                                                            | 0.0544                                                           | 0.0625                                                            | 0.0432                                                           | 0.0540                                                           | 0.0680                                                            | 0.0582                                                            |
| w <i>R</i> ( <i>F</i> <sup>2</sup> )                                     | 0.1706                                                                                                             | 0.1946                                                            | 0.1457                                                           | 0.1622                                                            | 0.1114                                                           | 0.1360                                                           | 0.1828                                                            | 0.1722                                                            |
| <i>S</i>                                                                 | 1.064                                                                                                              | 0.939                                                             | 1.053                                                            | 1.042                                                             | 1.040                                                            | 1.027                                                            | 0.958                                                             | 1.000                                                             |
| $\Delta\rho_{max}$                                                       | 0.828                                                                                                              | 1.549                                                             | 0.598                                                            | 1.590                                                             | 0.656                                                            | 0.680                                                            | 0.377                                                             | 0.647                                                             |
| $\Delta\rho_{min}$                                                       | -0.886                                                                                                             | -0.576                                                            | -0.657                                                           | -0.873                                                            | -0.586                                                           | -0.663                                                           | -0.823                                                            | -0.807                                                            |
| CCDC                                                                     | 2364764                                                                                                            | 2364766                                                           | 2364768                                                          | 2364759                                                           | 2364771                                                          | 2364761                                                          | 2364762                                                           | 2364767                                                           |

Table S 3: Selected bond lengths and angles for the complexes 1-R (R = Cl, O<sup>t</sup>Bu, OtBu<sup>F9</sup>, S<sup>t</sup>Bu, SCPh<sub>3</sub>, OMe<sub>s</sub>, SMes) and 2-R (R = Cl, O<sup>t</sup>Bu, OtBu<sup>F9</sup>, OCP<sub>3</sub>, OMe<sub>s</sub>, SMes) as well as reduced complexes [1]<sup>-</sup> and [2]<sup>-</sup> and dimers 3 and 4.

| Atoms               | 1-Cl                                  | 2-Cl                     | [1] <sup>-</sup>          | [2] <sup>-</sup>          | 3             | 4             | 1-O <sup>t</sup> Bu | 2-O <sup>t</sup> Bu | 1-O <sup>t</sup> Bu <sup>F9</sup> |
|---------------------|---------------------------------------|--------------------------|---------------------------|---------------------------|---------------|---------------|---------------------|---------------------|-----------------------------------|
| Mo1 – Mo1A          | -                                     | -                        | -                         | -                         | 2.2707(8)     | 2.2726(10)    | -                   | -                   | -                                 |
| Mo1 – C1            | 2.145(4)                              | 2.208(2)                 | 2.115(3)                  | 2.173(3)                  | 2.142(6)      | 2.177(7)      | 2.188(2)            | 2.256(11)           | 2.163(3)                          |
| Mo1 – O1            | 1.9268(19)                            | 1.9217(18)               | 2.0422(19)                | 2.0585(18)                | 1.929(5)      | 1.921(5)      | 1.9650(12)          | 1.945(7)            | 1.942(2)                          |
| Mo1 – O2            | 1.9269(19)                            | 1.9203(18)               | 2.0655(19)                | 2.0477(19)                | 1.929(5)      | 1.918(5)      | 1.9651(12)          | 1.959(8)            | 1.950(2)                          |
| Mo1 – N10           | 1.642(4)                              | 1.647(2)                 | 1.654(3)                  | 1.657(2)                  | -             | -             | 1.648(2)            | 1.641(8)            | 1.645(3)                          |
| Mo1 – X*            | 2.3714(11)                            | 2.3502(7)                | 2.4559(8)                 | 2.4520(7)                 | 2.3643(18)    | 2.3399(19)    | 1.8987(17)          | 1.892(6)            | 1.997(2)                          |
| C1 – Mo1 – X        | 161.74(10)                            | 157.88(7)                | 147.83(8)                 | 146.80(7)                 | 157.31(18)    | 159.1(2)      | 153.20(9)           | 156.2(3)            | 158.59(11)                        |
| O1 – Mo1 – O2       | 141.21(13)                            | 140.72(8)                | 145.93(8)                 | 142.13(8)                 | 147.7(2)      | 140.4(2)      | 145.94(8)           | 143.7(3)            | 149.61(10)                        |
| C1 – Mo1 – N10/Mo1A | 92.99(16)                             | 94.49(10)                | 102.61(11)                | 104.15(11)                | 96.71(17)     | 96.3(2)       | 98.68(10)           | 97.3(4)             | 94.75(14)                         |
| N10/Mo1A – Mo1 – X* | 105.30(13)                            | 107.62(8)                | 109.40(9)                 | 109.04(9)                 | 105.76(6)     | 104.55(6)     | 108.13(10)          | 106.5(4)            | 106.66(13)                        |
| Mo1 – X – C40       | -                                     | -                        | -                         | -                         | -             | -             | 141.87(17)          | 142.4(6)            | 152.0(2)                          |
| τ <sub>s</sub>      | 0.34                                  | 0.29                     | 0.03                      | 0.08                      | 0.16          | 0.31          | 0.12                | 0.21                | 0.15                              |
|                     | <b>2-O<sup>t</sup>Bu<sup>F9</sup></b> | <b>1-S<sup>t</sup>Bu</b> | <b>2-OCPh<sub>3</sub></b> | <b>1-SCPh<sub>3</sub></b> | <b>1-OMes</b> | <b>2-OMes</b> | <b>1-SMes</b>       | <b>2-SMes</b>       |                                   |
| Mo1 – Mo1A          | -                                     | -                        | -                         | -                         | -             | -             | -                   | -                   |                                   |
| Mo1 – C1            | 2.221(5)                              | 2.179(7)                 | 2.227(4)                  | 2.178(10)                 | 2.154(3)      | 2.201(4)      | 2.183(6)            | 2.225(3)            |                                   |
| Mo1 – O1            | 1.957(2)                              | 1.958(4)                 | 1.954(3)                  | 1.947(7)                  | 1.9271(19)    | 1.970(3)      | 1.941(4)            | 1.954(2)            |                                   |
| Mo1 – O2            | 1.957(2)                              | 1.970(5)                 | 1.945(3)                  | 1.947(7)                  | 1.9734(19)    | 1.941(3)      | 1.977(4)            | 1.946(2)            |                                   |
| Mo1 – N10           | 1.638(5)                              | 1.654(6)                 | 1.639(3)                  | 1.639(8)                  | 1.644(2)      | 1.650(4)      | 1.657(5)            | 1.639(2)            |                                   |
| Mo1 – X*            | 1.979(4)                              | 2.360(2)                 | 1.929(2)                  | 2.369(3)                  | 1.9378(17)    | 1.922(3)      | 2.3767(17)          | 2.3529(8)           |                                   |
| C1 – Mo1 – X        | 157.06(18)                            | 166.6(2)                 | 151.56(13)                | 156.1(3)                  | 159.09(9)     | 157.85(15)    | 165.92(17)          | 163.45(8)           |                                   |
| O1 – Mo1 – O2       | 149.49(16)                            | 141.53(19)               | 148.22(11)                | 150.5(3)                  | 140.65(8)     | 138.39(13)    | 142.88(18)          | 140.73(8)           |                                   |
| C1 – Mo1 – N10      | 96.5(2)                               | 96.7(3)                  | 101.22(15)                | 103.3(4)                  | 94.71(11)     | 92.50(16)     | 96.6(3)             | 97.39(12)           |                                   |
| N10 – Mo1 – X*      | 106.4(2)                              | 98.43(14)                | 107.22(14)                | 100.6(3)                  | 105.44(10)    | 109.27(15)    | 97.09(19)           | 98.74(9)            |                                   |
| Mo1 – X – C40       | 155.6(4)                              | 112.2(3)                 | 126.1(2)                  | 107.5(3)                  | 138.89(17)    | 158.3(3)      | 118.1(2)            | 116.17(10)          |                                   |
| τ <sub>s</sub>      | 0.13                                  | 0.42                     | 0.06                      | 0.09                      | 0.14          | 0.32          | 0.38                | 0.38                |                                   |

\*X = Cl1, O40, S40

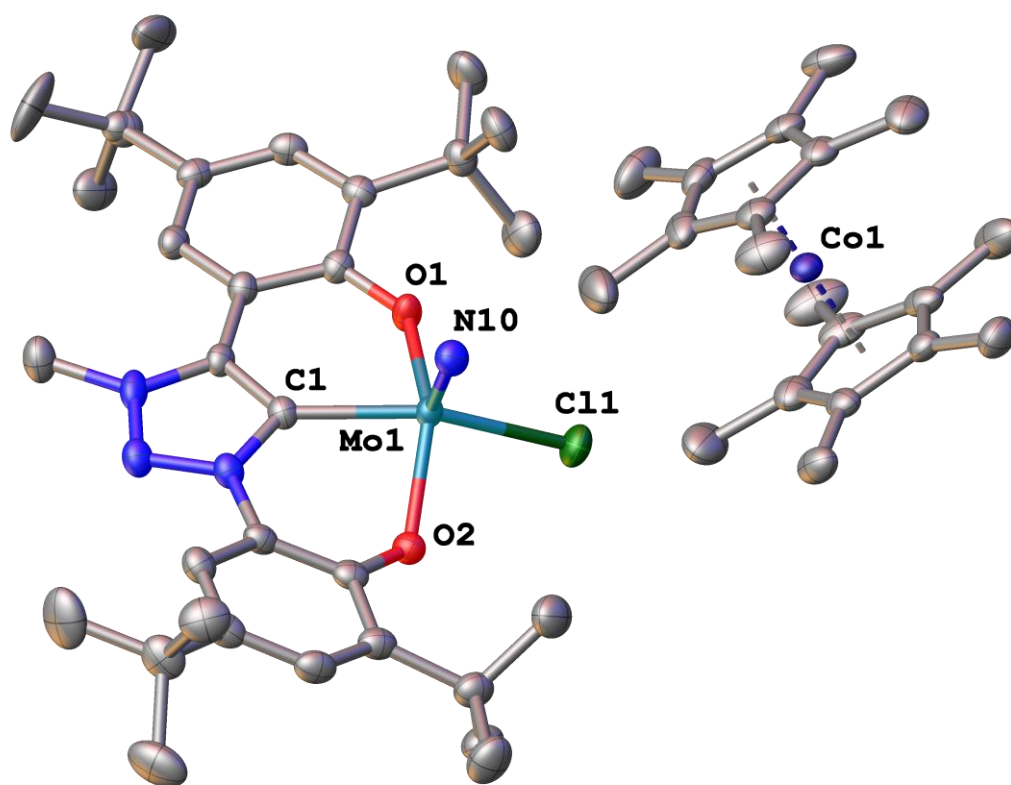

Figure S 123: Full molecular structure of the anionic complex  $[1-Cl]^-$  including the decamethyl cobaltocenium counterion. Hydrogen atoms and lattice solvent molecules have been omitted for clarity. Ellipsoids are shown at a probability level of 50%.

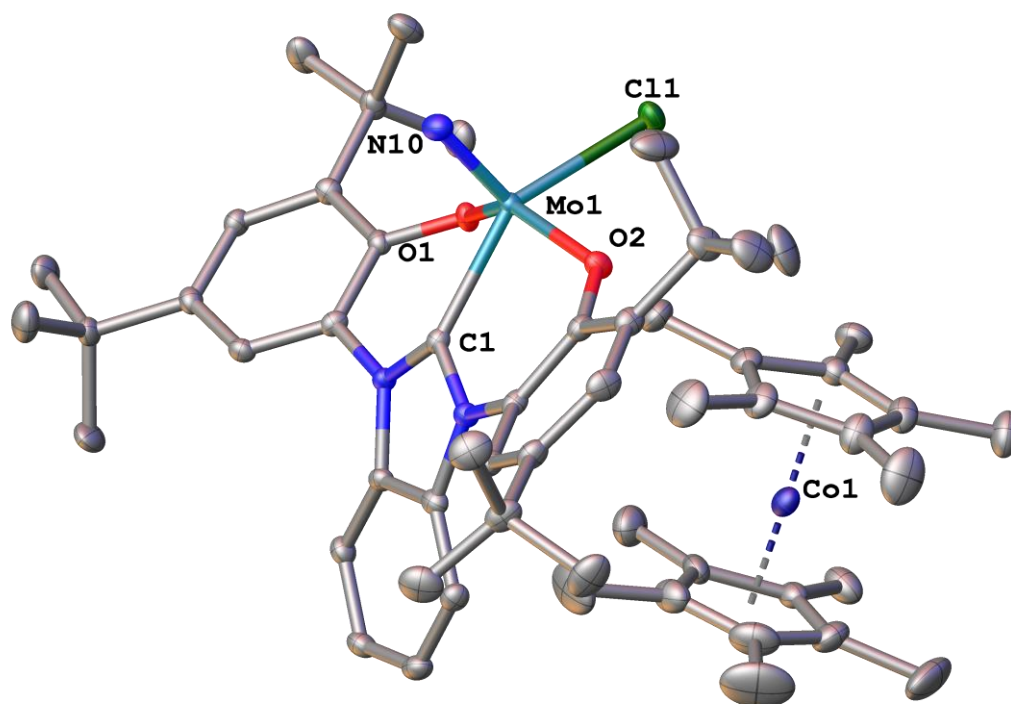

Figure S 124: Full molecular structure of the anionic complex  $[2-Cl]^-$  including the decamethyl cobaltocenium counterion. Hydrogen atoms and lattice solvent molecules have been omitted for clarity. Ellipsoids are shown at a probability level of 50%.

## 7. References

- [1] F. Neese, *WIREs*, **2022**, *12*, e1606.
- [2] a) S. Grimme, S. Ehrlich, L. Goerigk, *J. Comput. Chem.* **2011**, *32*, 1456-1465; b) S. Grimme, J. Antony, S. Ehrlich, H. Krieg, *J. Chem. Phys.* **2010**, *132*, 154104; d) J. P. Perdew, *Phys. Rev. B* **1986**, *33*, 8822-8824; e) F. Weigend, R. Ahlrichs, *Phys. Chem. Chem. Phys.* **2005**, *7*, 3297- 3305; g) J. P. Perdew, K. Burke, M. Ernzerhof, *Phys. Rev. Lett.* **1996**, *77*, 3865-3868.
- [3] D. A. Pantazis, X.-Y. Chen, C. R. Landis, F. Neese, *J. Chem. Theor. Comput.* **2008**, *4*, 908-919
- [4] a) E. v. Lenthe, E. J. Baerends, J. G. Snijders, *J. Chem. Phys.* **1993**, *99*, 4597-4610; b) C. van Wüllen, *J. Chem. Phys.* **1998**, *109*, 392-399.
- [5] F. Weigend, *Phys. Chem. Chem. Phys.* **2006**, *8*, 1057-1065.
